# Supplementary material
Source: PubMed Central journal article supplement (PMC6543812)
Supplement: NIHMS1026625-supplement-Supp_TableS1.pdf [file NIHMS1026625-supplement-Supp_TableS1.pdf]

| UniProt Acce | Protein Name   | P7 Mouse 1 | P7 Mouse 2 | P7 Mouse 3 | P7 Mouse 4 | P42 Mouse 1 |
|--------------|----------------|------------|------------|------------|------------|-------------|
| Q03265       | ATP synthase   | 15885000   | 15521000   | 12083000   | 13160000   | 66235000    |
| Q62277       | Synaptophysin  | 495950     | 333950     | 531900     | 802520     | 1691500     |
| Q9DCW4       | Electron tran  | 14857      | 37857      | 22106      | 13443      | 787140      |
| P63044       | Vesicle-assoc  | 233880     | 1066400    | 183210     | 132730     | 2098100     |
| Q64332       | Synapsin-2 O   | 335570     | 407180     | 234560     | 117360     | 1706200     |
| Q8BHS8       | Syntabulin O   | 212360     | 218550     | 331800     | 228880     | 23455       |
| Q91VD9       | NADH-ubiqui    | 1440300    | 1275200    | 1413100    | 941380     | 3355900     |
| Q9DBU0       | Transmembr     | 29327      | 23878      | 20027      | 36411      | 458900      |
| P11798       | Calcium/caln   | 198470     | 179650     | 158740     | 137900     | 1268800     |
| P51880       | Fatty acid-bir | 637470     | 595750     | 431740     | 518950     | 14043       |
| P68368       | Tubulin alpha  | 189090     | 130840     | 83719      | 129670     | 1070400     |
| P70404       | Isocitrate del | 103080     | 125900     | 66142      | 264860     | 1097600     |
| Q3TXX4       | Vesicular glu  | 96722      | 79398      | 33279      | 61898      | 312690      |
| Q9CPQ3       | Mitochondria   | 4760300    | 3612100    | 3559400    | 2933200    | 673070      |
| Q9CQ54       | NADH dehyd     | 210000     | 555240     | 224670     | 528320     | 1180200     |
| Q9Z1G4       | V-type proto   | 145600     | 240770     | 218600     | 164150     | 1103100     |
| Q99KI0       | Aconitate hy   | 4632500    | 4799500    | 4461200    | 3768500    | 12008000    |
| Q3TC72       | Fumarylaceto   | 6456.5     | 25767      | 25355      | 5506.3     | 157330      |
| P04370       | Myelin basic   | 67494      | 84944      | 94634      | 77209      | 731940      |
| P30275       | Creatine kina  | 1818200    | 2197000    | 1292400    | 905110     | 5414800     |
| P32037       | Solute carrier | 8482       | 56565      | 3712.1     | 5976.6     | 105450      |
| P39053       | Dynamin-1 C    | 220080     | 231980     | 214410     | 93221      | 978040      |
| P46096       | Synaptotagm    | 325410     | 419920     | 269220     | 205970     | 1120300     |
| P08249       | Malate dehyd   | 9798900    | 10694000   | 20648000   | 13419000   | 19369000    |
| P62754       | 40S ribosoma   | 264090     | 216890     | 135900     | 247550     | 12068       |
| P99027       | 60S acidic rib | 213700     | 301860     | 282260     | 229660     | 74083       |
| Q8BMF4       | Dihydrolipoy   | 225570     | 1887600    | 1491000    | 811170     | 2131400     |
| Q8BH04       | Phosphoenol    | 84515      | 127130     | 105310     | 71602      | 559500      |
| P01831       | Thy-1 memb     | 116030     | 97195      | 112310     | 333750     | 437720      |
| Q9D6F9       | Tubulin beta   | 88349      | 40732      | 23973      | 19411      | 292830      |
| O55100       | Synaptogyrin   | 171280     | 147400     | 117870     | 93837      | 488670      |
| P60202       | Myelin prote   | 29033      | 28807      | 54711      | 85723      | 339790      |
| Q99LC5       | Electron tran  | 42493      | 58823      | 56710      | 81983      | 861150      |
| Q9CRB8       | Mitochondria   | 53452      | 419150     | 206270     | 62880      | 833550      |
| Q9D164       | FXFD domain    | 169140     | 141650     | 139540     | 105160     | 33008       |
| Q9JLZ3       | Methylglutac   | 492950     | 713930     | 321110     | 288060     | 1446200     |
| A2ASZ8       | Calcium-bind   | 55341      | 22902      | 34818      | 51138      | 486700      |
| P60904       | DnaJ homolo    | 71454      | 66295      | 28975      | 29902      | 150840      |
| Q8BP92       | Reticulocalbi  | 171910     | 184390     | 326540     | 261410     | 57760       |
| Q9CQC7       | NADH dehyd     | 558150     | 563650     | 470820     | 2273700    | 1853700     |
| Q9Z2W9       | Glutamate re   | 1982.3     | 2736.1     | 2268.7     | 3274.4     | 59792       |

|        |               |          |          |          |          |         |
|--------|---------------|----------|----------|----------|----------|---------|
| O35658 | Complement    | 1778500  | 1430700  | 842770   | 1134500  | 619210  |
| Q8CD10 | Calcium upta  | 159170   | 128090   | 137050   | 135530   | 22401   |
| P14094 | Sodium/pota   | 245640   | 409030   | 231340   | 319960   | 732410  |
| P60710 | Actin, cytopl | 1508300  | 875230   | 2308800  | 2509000  | 50152   |
| Q9Z2Q6 | Septin-5 OS=  | 74405    | 87347    | 14252    | 25252    | 219950  |
| O08749 | Dihydrolipoy  | 48586    | 2086100  | 1133300  | 762610   | 2039000 |
| Q91WS0 | CDGSH iron-s  | 662380   | 820610   | 954840   | 1470900  | 1758100 |
| Q9WUR9 | Adenylate kin | 170860   | 345120   | 296660   | 482620   | 828860  |
| Q9D172 | ES1 protein h | 275330   | 273040   | 43511    | 20017    | 711240  |
| P09671 | Superoxide d  | 1761700  | 1870900  | 2531900  | 2482600  | 4576300 |
| P26049 | Gamma-amir    | 57118    | 52243    | 381540   | 19309    | 571240  |
| P24369 | Peptidyl-prol | 327280   | 261400   | 337450   | 117810   | 87588   |
| P30412 | Peptidyl-prol | 170950   | 136880   | 179800   | 244690   | 44608   |
| P50516 | V-type proto  | 223800   | 153010   | 127600   | 78453    | 375050  |
| P62823 | Ras-related p | 19444    | 20035    | 4738.9   | 9604     | 121890  |
| Q62420 | Endophilin-A  | 55025    | 41165    | 47679    | 15682    | 224500  |
| Q80Y14 | Glutaredoxin  | 2152200  | 2149900  | 2383100  | 2302700  | 960390  |
| Q9CZU6 | Citrate synth | 28258000 | 24517000 | 23211000 | 21922000 | 9297000 |
| P50518 | V-type proto  | 140270   | 332400   | 104780   | 146670   | 555470  |
| Q91ZX7 | Prolow-densi  | 151700   | 236750   | 192110   | 98422    | 31870   |
| Q6A058 | Armadillo rep | 98947    | 113570   | 101920   | 81240    | 4450.2  |
| Q9WTQ8 | Mitochondria  | 206040   | 270950   | 223110   | 180650   | 95384   |
| P17710 | Hexokinase-1  | 1462200  | 1378300  | 667810   | 558320   | 2307400 |
| Q9CY16 | 28S ribosoma  | 320050   | 676370   | 414850   | 561730   | 195870  |
| P52480 | Pyruvate kin  | 147730   | 330960   | 138220   | 203880   | 689030  |
| P63017 | Heat shock c  | 9664     | 232930   | 10131    | 15197    | 344020  |
| D3Z7P3 | Glutaminase   | 1021500  | 1202500  | 965620   | 789660   | 2626300 |
| Q6PDS3 | Sterile alpha | 238030   | 354940   | 281830   | 268950   | 61812   |
| P97450 | ATP synthase  | 492000   | 1048000  | 1505000  | 889940   | 2215000 |
| Q8BG39 | Synaptic vesi | 65186    | 84118    | 59502    | 113260   | 474060  |
| Q8BI08 | Protein MAL   | 153510   | 141510   | 105410   | 232990   | 453460  |
| Q8BMS1 | Trifunctional | 154220   | 15453    | 275640   | 263350   | 356270  |
| Q9CQ69 | Cytochrome    | 826610   | 929560   | 1117500  | 2246300  | 1093400 |
| Q8QZT1 | Acetyl-CoA a  | 11169000 | 11112000 | 13898000 | 12536000 | 7073600 |
| P28663 | Beta-soluble  | 141110   | 78477    | 14098    | 88807    | 237280  |
| O08599 | Syntaxin-bin  | 548280   | 715710   | 239620   | 211140   | 1614200 |
| P84075 | Neuron-spec   | 20557    | 27784    | 8436.6   | 16451    | 185740  |
| P63260 | Actin, cytopl | 1038800  | 605410   | 2013700  | 1769200  | 66976   |
| Q9D1G1 | Ras-related p | 101200   | 63053    | 17923    | 7695.2   | 185100  |
| Q9QXV0 | ProSAAS OS=   | 140810   | 206360   | 165410   | 213270   | 404990  |
| Q9CZR8 | Elongation fa | 46844    | 30034    | 53097    | 43615    | 250310  |
| Q7TMF3 | NADH dehyd    | 617590   | 617590   | 458380   | 416970   | 2485700 |

|        |                |         |          |          |         |          |
|--------|----------------|---------|----------|----------|---------|----------|
| P14131 | 40S ribosoma   | 133120  | 101730   | 110460   | 175500  | 26905    |
| P16125 | L-lactate deh  | 290450  | 254280   | 198020   | 242090  | 457790   |
| P46097 | Synaptotagr    | 24356   | 45275    | 46573    | 75612   | 129320   |
| Q9CYH2 | Redox-regula   | 317340  | 634840   | 316630   | 248240  | 986500   |
| Q9EQF6 | Dihydropyri    | 273990  | 230050   | 430790   | 118520  | 88437    |
| Q8R191 | Synaptogyrin   | 366110  | 396480   | 281530   | 275970  | 643230   |
| Q9R0K7 | Plasma mem     | 95428   | 147080   | 30592    | 44633   | 162360   |
| Q99N89 | 39S ribosoma   | 516810  | 266830   | 568510   | 574820  | 164130   |
| Q9Z0V7 | Mitochondria   | 445850  | 416940   | 392190   | 339820  | 148210   |
| Q99MB2 | Mitochondria   | 291460  | 227490   | 103740   | 27509   | 28572    |
| Q9JJG9 | Nitric oxide-a | 7661.5  | 8735.9   | 1830400  | 1911600 | 15447    |
| Q61425 | Hydroxyacyl-   | 37949   | 279440   | 57853    | 40292   | 168410   |
| P35802 | Neuronal me    | 281480  | 307290   | 141300   | 150390  | 567860   |
| P46460 | Vesicle-fusio  | 276710  | 446880   | 201170   | 611700  | 1195100  |
| Q8BLN5 | Lanosterol sy  | 114980  | 121720   | 120640   | 114830  | 10027    |
| Q8BMG8 | Mitochondria   | 55579   | 30050    | 68440    | 11955   | 40099    |
| Q9D6R2 | Isocitrate del | 8373100 | 10927000 | 10760000 | 8607000 | 15932000 |
| Q9D8E6 | 60S ribosoma   | 212410  | 165370   | 79231    | 206620  | 50470    |
| Q9WVL0 | Maleylaceto    | 11162   | 153620   | 9989.4   | 31582   | 21518    |
| P28652 | Calcium/caln   | 197520  | 153610   | 143120   | 96685   | 285790   |
| Q6PIC6 | Sodium/pota    | 110270  | 95562    | 56287    | 38239   | 142710   |
| Q9D6U8 | Protein FAM    | 103840  | 21376    | 36055    | 45896   | 159120   |
| P61264 | Syntaxin-1B (  | 297230  | 265460   | 205070   | 253260  | 571800   |
| Q9JHS4 | ATP-depende    | 434290  | 580440   | 596770   | 504790  | 274080   |
| Q9CQ40 | 39S ribosoma   | 310790  | 447110   | 505940   | 393670  | 167890   |
| P05202 | Aspartate ar   | 1744100 | 2398000  | 3364300  | 2300900 | 3301800  |
| Q62425 | Cytochrome     | 3646000 | 5739700  | 3663200  | 3625600 | 6311100  |
| Q68FD5 | Clathrin heav  | 669040  | 683020   | 426640   | 334530  | 1179000  |
| Q791T5 | Mitochondria   | 260940  | 435660   | 279180   | 136210  | 31679    |
| P05063 | Fructose-bisph | 54731   | 197930   | 27293    | 115170  | 236860   |
| Q99KR7 | Peptidyl-prol  | 4168.6  | 1398.8   | 975.5    | 8117.2  | 48520    |
| O08734 | Bcl-2 homolc   | 205390  | 240570   | 255330   | 229110  | 83458    |
| P06837 | Neuromodul     | 777390  | 512680   | 455970   | 481690  | 360730   |
| P58064 | 28S ribosoma   | 54208   | 58580    | 314170   | 268460  | 3248.8   |
| Q6PCP5 | Mitochondria   | 23692   | 18429    | 11790    | 47961   | 217470   |
| Q8K009 | Mitochondria   | 429190  | 1098500  | 446600   | 301630  | 177160   |
| Q91XM9 | Disks large ho | 60107   | 100520   | 45359    | 98775   | 188600   |
| Q91YT0 | NADH dehyd     | 801880  | 3293000  | 721290   | 729140  | 3117400  |
| Q91ZZ3 | Beta-synucle   | 41330   | 56215    | 57876    | 123840  | 190720   |
| Q99KK9 | Probable hist  | 236580  | 214160   | 228440   | 209990  | 93086    |
| Q921H9 | Cytochrome     | 234010  | 369740   | 609120   | 567470  | 150380   |
| P05201 | Aspartate ar   | 60611   | 20908    | 5757.1   | 4509.5  | 101240   |

|        |                |         |         |         |         |         |
|--------|----------------|---------|---------|---------|---------|---------|
| P57746 | V-type proto   | 50740   | 43052   | 42154   | 69764   | 96672   |
| Q64516 | Glycerol kina  | 692650  | 1715400 | 844110  | 613420  | 1794100 |
| P14873 | Microtubule-   | 292590  | 293900  | 223610  | 7598.7  | 44508   |
| P55096 | ATP-binding    | 91422   | 105110  | 281720  | 160350  | 31848   |
| P50431 | Serine hydro   | 111830  | 134500  | 825420  | 906030  | 46137   |
| P16858 | Glyceraldehy   | 39285   | 91693   | 77928   | 59904   | 351700  |
| Q9Z110 | Delta-1-pyrr   | 506600  | 570170  | 681190  | 632920  | 232050  |
| Q9D855 | Cytochrome     | 80316   | 57640   | 27806   | 98295   | 246940  |
| P08228 | Superoxide d   | 6448.5  | 12444   | 28101   | 34308   | 40418   |
| Q7TQD2 | Tubulin polyr  | 125850  | 86879   | 94476   | 60509   | 233510  |
| Q8BX10 | Serine/threo   | 1549700 | 1211700 | 1091700 | 1317900 | 390370  |
| Q923T9 | Calcium/caln   | 20976   | 20511   | 29002   | 30343   | 190570  |
| Q9CQU3 | Protein RER1   | 31894   | 22645   | 25158   | 27100   | 958.57  |
| Q9DC71 | 28S ribosoma   | 7465.1  | 11771   | 1886    | 982.71  | 6552.4  |
| P17183 | Gamma-enol     | 9719.3  | 8078.8  | 2341.1  | 3013.7  | 48286   |
| Q80U23 | Syntaphilin C  | 13886   | 17980   | 28938   | 14238   | 78580   |
| Q99JB2 | Stomatin-like  | 35613   | 67735   | 22364   | 8130.3  | 253110  |
| Q9CR62 | Mitochondria   | 1296800 | 1430500 | 1499100 | 1364000 | 2046500 |
| P54071 | Isocitrate del | 1125800 | 2505100 | 2406100 | 2209200 | 798280  |
| Q9D964 | Glycine amid   | 195760  | 195200  | 167920  | 96616   | 41304   |
| Q8BIZ1 | Ankyrin repe   | 2124.4  | 6802.3  | 6044.7  | 1027.8  | 25551   |
| Q8JZM4 | Delta and No   | 101110  | 82298   | 62925   | 134450  | 21935   |
| Q8K1Z0 | Ubiquinone b   | 68678   | 58716   | 48018   | 68038   | 167250  |
| Q9CQE3 | 28S ribosoma   | 452700  | 466470  | 491500  | 434420  | 180950  |
| Q9D1I6 | 39S ribosoma   | 622520  | 634030  | 718830  | 692630  | 190930  |
| Q9Z218 | Dipeptidyl ar  | 13989   | 97661   | 23266   | 10279   | 92546   |
| Q60936 | Atypical kina  | 12715   | 11440   | 49694   | 8684.8  | 171410  |
| Q6P3A8 | 2-oxoisovaler  | 177450  | 134990  | 406720  | 350600  | 9506.5  |
| Q3TL26 | Dimethylade    | 85749   | 65947   | 65899   | 72823   | 5283.5  |
| Q8BWT1 | 3-ketoacyl-Co  | 1735000 | 1756200 | 1562800 | 1300300 | 619810  |
| Q62442 | Vesicle-assoc  | 303510  | 233230  | 76466   | 56851   | 614430  |
| Q9CQA6 | Coiled-coil-h  | 152690  | 233190  | 346150  | 353010  | 100540  |
| P62737 | Actin, aortic  | 79212   | 136120  | 140200  | 98270   | 51356   |
| O88986 | 2-amino-3-ke   | 61718   | 84942   | 442090  | 428320  | 41817   |
| P63011 | Ras-related p  | 50597   | 47938   | 23838   | 16202   | 114030  |
| O70503 | Very-long-ch   | 165850  | 114930  | 121120  | 117940  | 17340   |
| Q9CQR4 | Acyl-coenzyn   | 322180  | 557490  | 575390  | 551320  | 1280900 |
| Q9Z1S5 | Neuronal-spe   | 170130  | 84606   | 138960  | 122880  | 231390  |
| P54869 | Hydroxymetf    | 114650  | 163140  | 331420  | 505070  | 49479   |
| P31786 | Acyl-CoA-bin   | 518140  | 499160  | 281440  | 369480  | 145270  |
| P58059 | 28S ribosoma   | 893970  | 864130  | 825280  | 808250  | 354430  |
| P14211 | Calreticulin C | 243500  | 294450  | 357440  | 344380  | 97283   |

|        |                |         |         |         |        |         |
|--------|----------------|---------|---------|---------|--------|---------|
| Q8VE22 | 28S ribosoma   | 1446400 | 1280600 | 1018000 | 903740 | 317170  |
| P14115 | 60S ribosoma   | 125480  | 105950  | 174600  | 342550 | 96592   |
| Q8BTX9 | Inactive hydr  | 340710  | 449770  | 433690  | 355850 | 164220  |
| Q9Z2W8 | Glutamate re   | 34620   | 50313   | 17172   | 3786.5 | 62257   |
| P01869 | Ig gamma-1 c   | 362070  | 368340  | 443550  | 453570 | 161700  |
| P14869 | 60S acidic rib | 247430  | 149790  | 157410  | 192300 | 73197   |
| Q62188 | Dihydropyrim   | 532140  | 465010  | 177900  | 197010 | 91378   |
| Q6ZQA6 | Immunoglob     | 8433.7  | 6674.3  | 2210.8  | 12727  | 20202   |
| Q61548 | Clathrin coat  | 55429   | 7307.3  | 8681.8  | 5222.7 | 297930  |
| Q9D0S9 | Histidine tria | 296180  | 247580  | 274220  | 196800 | 571520  |
| P62855 | 40S ribosoma   | 81992   | 79403   | 36342   | 69450  | 4326.3  |
| Q6GQS1 | Calcium-bind   | 14138   | 121030  | 51226   | 39196  | 95941   |
| Q8BHC1 | Ras-related p  | 17677   | 64011   | 48766   | 71293  | 67828   |
| Q9D3D9 | ATP synthase   | 74310   | 48931   | 80811   | 59754  | 148840  |
| Q9WV55 | Vesicle-assoc  | 12283   | 3538.3  | 5526.2  | 30817  | 80366   |
| O35972 | 39S ribosoma   | 155770  | 156760  | 179380  | 161210 | 18489   |
| P17182 | Alpha-enolas   | 90544   | 229020  | 119660  | 73725  | 379390  |
| Q9CQU0 | Thioredoxin c  | 28744   | 56574   | 63791   | 139870 | 11958   |
| Q9CR95 | Adaptin ear-l  | 9731.3  | 9283    | 3451.7  | 16748  | 19307   |
| Q8C5Q4 | G-rich seque   | 160860  | 181810  | 170000  | 149550 | 86634   |
| Q9D1H6 | NADH dehyd     | 22283   | 64107   | 15433   | 2930.9 | 59893   |
| P63040 | Complexin-1    | 9112.6  | 12721   | 6722.8  | 34989  | 6081.3  |
| P62814 | V-type proto   | 136350  | 200610  | 125940  | 97164  | 182690  |
| P16330 | 2',3'-cyclic-n | 135680  | 66996   | 138680  | 110160 | 305870  |
| P32848 | Parvalbumin    | 6946.1  | 7514.8  | 14193   | 3468.7 | 31427   |
| Q9R1T4 | Septin-6 OS=   | 22571   | 40648   | 5651.7  | 16425  | 14571   |
| Q8K2Y7 | 39S ribosoma   | 52377   | 19373   | 144450  | 35778  | 317040  |
| Q8BVE3 | V-type proto   | 252200  | 205980  | 177080  | 190670 | 605360  |
| O88712 | C-terminal-bi  | 18649   | 21065   | 45132   | 19266  | 45675   |
| Q9DB60 | Prostamide/p   | 79014   | 68485   | 54437   | 74554  | 123640  |
| Q8K3J1 | NADH dehyd     | 61313   | 45817   | 28834   | 7877.2 | 68824   |
| Q9CTY5 | Calcium upta   | 74044   | 151220  | 44369   | 49416  | 290060  |
| O55042 | Alpha-synucl   | 45559   | 32894   | 1285.3  | 81188  | 103510  |
| P21279 | Guanine nucl   | 521230  | 473270  | 409360  | 272000 | 193750  |
| Q8VDN2 | Sodium/pota    | 353980  | 337680  | 248970  | 261670 | 748650  |
| Q61578 | NADPH:adren    | 241450  | 220220  | 250160  | 218280 | 131000  |
| Q8R1I1 | Cytochrome     | 76595   | 108860  | 90584   | 104180 | 161560  |
| Q8C0M9 | Isoaspartyl p  | 9882.8  | 53285   | 28256   | 61117  | 30770   |
| Q9CXZ1 | NADH dehyd     | 289770  | 555380  | 163920  | 436760 | 1382800 |
| P56564 | Excitatory an  | 68272   | 109750  | 80294   | 24700  | 235160  |
| Q9DC69 | NADH dehyd     | 77993   | 51689   | 32308   | 20815  | 890290  |
| Q3UHJ0 | AP2-associat   | 28234   | 9835    | 20870   | 20251  | 93106   |

|        |                |          |          |          |          |          |
|--------|----------------|----------|----------|----------|----------|----------|
| Q8BVI4 | Dihydropteri   | 12947    | 17553    | 5094.7   | 14609    | 64176    |
| Q91V92 | ATP-citrate s  | 491940   | 428730   | 242840   | 193470   | 103190   |
| P56480 | ATP synthase   | 46306000 | 42399000 | 37229000 | 31068000 | 51266000 |
| Q3UZV7 | UPF0577 pro    | 5077.4   | 22852    | 7876.7   | 20949    | 15387    |
| P09411 | Phosphoglyc    | 68331    | 123400   | 87109    | 67991    | 295950   |
| P43006 | Excitatory an  | 97575    | 53678    | 75901    | 30833    | 36261    |
| Q9DCU6 | 39S ribosoma   | 517500   | 798610   | 640500   | 957130   | 329340   |
| Q80TJ1 | Calcium-depe   | 32155    | 19225    | 12048    | 30107    | 28484    |
| Q9CZS1 | Aldehyde del   | 436710   | 529980   | 516560   | 451710   | 277290   |
| Q9D1L0 | Coiled-coil-h  | 12612    | 9253.3   | 863140   | 840630   | 17710    |
| P99029 | Peroxiredoxi   | 3855300  | 7615400  | 6052300  | 3386300  | 8538600  |
| Q3UIU2 | NADH dehyd     | 10086    | 38824    | 54797    | 17238    | 17210    |
| P67778 | Prohibitin OS  | 13514000 | 12668000 | 10127000 | 10099000 | 8523300  |
| P17751 | Triosephosph   | 108790   | 36476    | 70484    | 131210   | 167670   |
| Q9ZOR9 | Fatty acid de  | 85509    | 69213    | 51731    | 99861    | 7639.4   |
| P14148 | 60S ribosoma   | 266820   | 227540   | 157140   | 198850   | 117340   |
| O70439 | Syntaxin-7 O   | 177410   | 128450   | 141250   | 135100   | 60243    |
| Q99LC3 | NADH dehyd     | 722920   | 1496600  | 435360   | 92612    | 1332000  |
| Q9JK42 | [Pyruvate de   | 104770   | 531190   | 367920   | 275520   | 517140   |
| P14152 | Malate dehyd   | 359750   | 365520   | 190200   | 172310   | 170260   |
| Q99JX3 | Golgi reasser  | 6694.1   | 9387     | 19487    | 12059    | 7838.7   |
| Q9WUM5 | Succinate--Co  | 448120   | 337200   | 406120   | 868890   | 511740   |
| P03888 | NADH-ubiqui    | 57067    | 50153    | 128130   | 84218    | 79606    |
| Q3UUI3 | Acyl-coenzym   | 580170   | 491790   | 335080   | 736340   | 923330   |
| Q99N96 | 39S ribosoma   | 267890   | 291470   | 304160   | 233110   | 93609    |
| Q9ER00 | Syntaxin-12 C  | 463440   | 178430   | 347520   | 270530   | 188000   |
| Q3UHB1 | 5'-nucleotida  | 63293    | 73577    | 108660   | 109000   | 145900   |
| Q99LB2 | Dehydrogenase  | 98809    | 49555    | 51810    | 130530   | 161900   |
| Q9CQV7 | Mitochondria   | 241380   | 251990   | 265400   | 304910   | 156240   |
| P05064 | Fructose-bisph | 136890   | 80568    | 62247    | 145900   | 461940   |
| Q9QZH6 | Evolutionarily | 302790   | 372640   | 358460   | 371060   | 194180   |
| Q78J03 | Methionine-l   | 128520   | 864530   | 133350   | 963420   | 170860   |
| Q9CXD6 | Mitochondria   | 175780   | 182880   | 118110   | 78954    | 36599    |
| Q9JIS5 | Synaptic vesic | 164660   | 79043    | 99771    | 124170   | 162380   |
| Q7TQF7 | Amphiphysin    | 48817    | 21918    | 32241    | 42283    | 103760   |
| Q9CQE1 | Protein NipSi  | 328910   | 639230   | 1014400  | 1144800  | 226490   |
| Q3UHL1 | CaM kinase-l   | 75197    | 76937    | 29010    | 25711    | 112740   |
| Q61206 | Platelet-activ | 456.47   | 236.08   | 11007    | 1775     | 12366    |
| P12787 | Cytochrome     | 2475300  | 6732900  | 3248100  | 2742400  | 4335500  |
| P17225 | Polypyrimidin  | 66269    | 59249    | 41188    | 145820   | 21112    |
| P56135 | ATP synthase   | 147500   | 176950   | 330480   | 164650   | 132370   |
| Q3ULJ0 | Glycerol-3-ph  | 30574    | 64789    | 45732    | 48111    | 64185    |

|        |                |         |         |         |         |         |
|--------|----------------|---------|---------|---------|---------|---------|
| Q99JY0 | Trifunctional  | 16576   | 10123   | 5629.8  | 15773   | 40401   |
| Q9CR68 | Cytochrome     | 2040900 | 2106800 | 1006500 | 953410  | 2448300 |
| P08752 | Guanine nucl   | 235930  | 214710  | 250280  | 205270  | 128560  |
| P09925 | Surfeit locus  | 30714   | 19464   | 22419   | 33169   | 203100  |
| P26040 | Ezrin OS=Mu    | 37661   | 50600   | 14536   | 12230   | 218570  |
| Q8VCL2 | Protein SCO2   | 157150  | 176390  | 161150  | 167280  | 84827   |
| Q9WU79 | Proline dehy   | 163500  | 41228   | 46635   | 88620   | 91013   |
| P02088 | Hemoglobin     | 78865   | 43269   | 32124   | 58882   | 293530  |
| Q9CQ92 | Mitochondria   | 47328   | 26470   | 17666   | 16004   | 273300  |
| Q9D6K8 | FUN14 doma     | 56049   | 8447.7  | 116100  | 48505   | 161290  |
| Q9CRD0 | OCIA domain    | 11656   | 5129.1  | 1759.4  | 4326.5  | 4663.2  |
| P13595 | Neural cell ac | 855860  | 920750  | 911470  | 822190  | 582300  |
| P62077 | Mitochondria   | 106260  | 156330  | 431230  | 379670  | 128980  |
| P62743 | AP-2 comple    | 171270  | 156350  | 85089   | 103330  | 297760  |
| P97427 | Dihydropyrim   | 91690   | 100970  | 37114   | 264570  | 60714   |
| Q8CAQ8 | MICOS comp     | 1389500 | 1619600 | 1923100 | 2111100 | 3279600 |
| Q9CRA7 | ATP synthase   | 40477   | 112350  | 85606   | 75217   | 96968   |
| Q9Z2I2 | Peptidyl-prol  | 52460   | 40983   | 16108   | 183750  | 68714   |
| Q5SWT3 | Solute carrier | 22554   | 14826   | 11002   | 5620.6  | 43380   |
| Q922B1 | O-acetyl-ADF   | 9057.4  | 71606   | 41345   | 51340   | 42684   |
| Q61165 | Sodium/hydr    | 66741   | 68608   | 23571   | 11726   | 21486   |
| Q8C437 | PEX5-related   | 65043   | 102560  | 6252.7  | 29356   | 162250  |
| Q91ZE0 | Trimethyllysi  | 50391   | 63422   | 76361   | 74468   | 14266   |
| Q8BW75 | Amine oxidase  | 49791   | 34332   | 18149   | 32877   | 74162   |
| Q91WM2 | Haloacid deh   | 17073   | 8809.7  | 22908   | 1272.2  | 41717   |
| Q9CWE0 | Mitochondria   | 37566   | 65178   | 16619   | 21214   | 98959   |
| D3YZU1 | SH3 and mul    | 42949   | 8566.3  | 29506   | 3787.8  | 57410   |
| P10649 | Glutathione !  | 290430  | 150930  | 355290  | 808410  | 122960  |
| Q60714 | Long-chain fa  | 195180  | 212980  | 188220  | 226510  | 108660  |
| Q9D1Q6 | Endoplasmic    | 141920  | 99170   | 4854.7  | 305460  | 32948   |
| O55131 | Septin-7 OS=   | 215980  | 191010  | 16249   | 9339.1  | 212690  |
| P38647 | Stress-70 prc  | 2134800 | 4481200 | 1363900 | 1104800 | 5272800 |
| P51175 | Protoporphyr   | 81164   | 62532   | 193060  | 186200  | 111570  |
| Q91YY4 | ATP synthase   | 52987   | 57775   | 263620  | 263610  | 13270   |
| Q9CQX8 | 28S ribosoma   | 492340  | 1213300 | 495690  | 346020  | 1205200 |
| Q9CR88 | 28S ribosoma   | 264070  | 254160  | 146950  | 115150  | 117720  |
| Q71LX4 | Talin-2 OS=M   | 60729   | 138110  | 51623   | 5277.1  | 4401.2  |
| Q9DC51 | Guanine nucl   | 81333   | 85407   | 48397   | 39387   | 94677   |
| Q9D0K2 | Succinyl-CoA   | 334330  | 566910  | 411140  | 225730  | 444650  |
| Q8VCM4 | Lipoyltransfe  | 416630  | 394910  | 526970  | 47880   | 617470  |
| Q91WC3 | Long-chain-fa  | 41840   | 41154   | 11958   | 26769   | 368260  |
| Q8C1B1 | Calmodulin-r   | 15967   | 5693.8  | 27357   | 5314.7  | 6197    |

|        |                 |         |         |         |         |         |
|--------|-----------------|---------|---------|---------|---------|---------|
| Q8BVU5 | ADP-ribose p    | 90485   | 103920  | 99896   | 76158   | 55561   |
| Q9CZ13 | Cytochrome      | 1517000 | 1297100 | 237810  | 5173900 | 1183000 |
| Q9JKF7 | 39S ribosoma    | 554960  | 1039500 | 428860  | 330610  | 475780  |
| Q9Z0S1 | 3'(2'),5'-bispl | 40101   | 38749   | 41444   | 107670  | 84384   |
| O08756 | 3-hydroxyacy    | 1548700 | 1531400 | 1739700 | 1250100 | 1004600 |
| P35279 | Ras-related p   | 46070   | 124360  | 31376   | 103430  | 252220  |
| P84091 | AP-2 comple:    | 12670   | 56482   | 5079.1  | 39332   | 181310  |
| Q60864 | Stress-induce   | 46088   | 4048.2  | 45083   | 2861    | 61119   |
| Q8R164 | Valacyclovir l  | 149740  | 115810  | 266940  | 209190  | 136510  |
| Q91YM4 | Protein TBRC    | 151160  | 124160  | 139820  | 87015   | 70630   |
| A2AN08 | E3 ubiquitin-   | 13970   | 1281500 | 53863   | 25925   | 1130800 |
| Q8BH59 | Calcium-bind    | 3524400 | 4565400 | 4462400 | 4152200 | 6990400 |
| O70252 | Heme oxygen     | 8644.3  | 18753   | 26306   | 9677.1  | 34616   |
| P56379 | 6.8 kDa mito    | 252750  | 206620  | 533100  | 1630700 | 268380  |
| Q61187 | Tumor susce     | 7786.7  | 7763.9  | 3655.8  | 15360   | 14229   |
| Q9DB77 | Cytochrome      | 2972300 | 2807100 | 2609700 | 2202200 | 4121800 |
| Q9QYF1 | Retinol dehy    | 50174   | 35552   | 43693   | 39546   | 15343   |
| Q9WTP6 | Adenylate kir   | 16172   | 5316.2  | 4652.8  | 4774.3  | 181660  |
| Q9Z2I8 | Succinate--Cr   | 536650  | 469690  | 517200  | 506480  | 209160  |
| Q6DYE8 | Ectonucleoti    | 4613    | 3735.9  | 3702.1  | 26665   | 1316.2  |
| Q9R1V6 | Disintegrin a   | 4832.5  | 5490.4  | 1814.4  | 2645.3  | 6802.6  |
| Q9CQN1 | Heat shock p    | 410150  | 392550  | 489060  | 356820  | 230340  |
| Q9CPP6 | NADH dehyd      | 241640  | 221480  | 143040  | 140560  | 1328300 |
| G5E829 | Plasma mem      | 49976   | 42908   | 24754   | 632140  | 7562.3  |
| P51660 | Peroxisomal     | 125610  | 193440  | 301530  | 270030  | 156700  |
| Q8K0T0 | Reticulon-1 C   | 6945.2  | 144440  | 113990  | 48172   | 101600  |
| Q8K4Z3 | NAD(P)H-hyc     | 8546.6  | 101020  | 25298   | 39781   | 92890   |
| Q9CRC0 | Vitamin K ep    | 15616   | 3482.8  | 179480  | 167040  | 10672   |
| Q9D1B9 | 39S ribosoma    | 278600  | 335000  | 380140  | 473940  | 232690  |
| Q99JT1 | Glutamyl-tRN    | 165090  | 204070  | 189690  | 184660  | 134000  |
| Q9CQS4 | Solute carri    | 58990   | 95991   | 92477   | 52305   | 150900  |
| Q8BK03 | Mitoguardin     | 82136   | 71881   | 34751   | 45348   | 128580  |
| Q04447 | Creatine kina   | 1132100 | 1521300 | 781780  | 65389   | 1584900 |
| Q8K2T4 | Ubiquinol-cy    | 29033   | 14950   | 38009   | 35908   | 54690   |
| Q3TUH1 | Phosphatida     | 57834   | 4283.9  | 63194   | 54410   | 2367.1  |
| Q6ZWN5 | 40S ribosoma    | 98720   | 8191.1  | 86838   | 215810  | 73246   |
| Q99JR6 | Nicotinamide    | 19499   | 55995   | 68953   | 74621   | 26164   |
| Q9DCX2 | ATP synthase    | 888760  | 884640  | 904190  | 881260  | 1179400 |
| Q9DCC8 | Mitochondria    | 918940  | 705630  | 787760  | 774990  | 581100  |
| Q9CQV8 | 14-3-3 protei   | 8169.6  | 35192   | 13608   | 2263    | 41812   |
| Q8BUY5 | Complex I as    | 213060  | 218930  | 255170  | 247780  | 147690  |
| O35657 | Sialidase-1 O   | 27006   | 14446   | 39436   | 4319.1  | 17443   |



|        |               |         |         |         |         |         |
|--------|---------------|---------|---------|---------|---------|---------|
| Q8BPN8 | DmX-like pro  | 24511   | 12050   | 38677   | 9037.9  | 69077   |
| P47962 | 60S ribosoma  | 30704   | 20787   | 18513   | 136660  | 5815.1  |
| Q3UNZ8 | Quinone oxid  | 11372   | 1393    | 13906   | 40133   | 40597   |
| Q5FWK3 | Rho GTPase-   | 84653   | 39363   | 19992   | 46528   | 97522   |
| Q8R123 | FAD synthase  | 54451   | 42273   | 11367   | 7333.8  | 66181   |
| Q921H8 | 3-ketoacyl-Co | 122310  | 111630  | 148630  | 21294   | 17452   |
| Q99J39 | Malonyl-CoA   | 79258   | 109780  | 195830  | 131110  | 164510  |
| Q9DBF1 | Alpha-amino   | 31076   | 5461.5  | 13273   | 25060   | 12976   |
| Q8K0U4 | Heat shock 7  | 84287   | 90782   | 45319   | 40647   | 165060  |
| P18872 | Guanine nucl  | 446070  | 328840  | 199100  | 247850  | 581650  |
| Q61016 | Guanine nucl  | 8395.7  | 56580   | 22579   | 15259   | 136630  |
| Q8BMF3 | NADP-depen    | 128670  | 103300  | 47021   | 50373   | 185690  |
| P97287 | Induced mye   | 76293   | 52918   | 56621   | 39628   | 1713.5  |
| P85094 | Isochorismat  | 3536.2  | 2111.4  | 1848.9  | 3477.5  | 1985.3  |
| P47857 | ATP-depende   | 90769   | 76587   | 16396   | 11446   | 94515   |
| O55125 | Protein NipSi | 63400   | 192660  | 204510  | 76632   | 14467   |
| P03921 | NADH-ubiqui   | 48536   | 11275   | 55363   | 111500  | 12134   |
| P12970 | 60S ribosoma  | 261240  | 220800  | 134880  | 219810  | 88437   |
| Q3U186 | Probable arg  | 721600  | 57318   | 722000  | 116380  | 49555   |
| Q9DBG3 | AP-2 comple   | 102480  | 180550  | 105680  | 115780  | 208350  |
| Q9Z0W3 | Nuclear pore  | 130050  | 185900  | 316520  | 514040  | 42794   |
| Q9Z2Q5 | 39S ribosoma  | 387770  | 356820  | 324130  | 213190  | 245140  |
| F6SEU4 | Ras/Rap GTP   | 9716.2  | 8880.7  | 20286   | 11493   | 9378.1  |
| Q9DCS9 | NADH dehyd    | 1312000 | 1013100 | 1244700 | 1102800 | 1320600 |
| P61021 | Ras-related p | 6031.4  | 67840   | 21615   | 37860   | 76526   |
| P97807 | Fumarate hy   | 413490  | 534610  | 224730  | 153660  | 510760  |
| Q3V384 | AFG1-like AT  | 5969.5  | 1196.6  | 2151.1  | 4810.9  | 3698.7  |
| Q8BFY9 | Transportin-  | 77186   | 112880  | 69000   | 47904   | 44964   |
| Q8BYL4 | Tyrosine--tRN | 25906   | 37593   | 24769   | 7798.6  | 40182   |
| Q99LB7 | Sarcosine del | 3895.7  | 5088.5  | 4760    | 2256.4  | 35878   |
| Q9WUA3 | ATP-depende   | 16687   | 24369   | 85481   | 14094   | 87986   |
| Q9WUM4 | Coronin-1C C  | 244050  | 201610  | 22227   | 9454.5  | 44241   |
| P53702 | Cytochrome    | 3475.1  | 32129   | 88106   | 257640  | 1455.1  |
| P08551 | Neurofilamen  | 4772.3  | 3590.9  | 2163.9  | 7681.7  | 101440  |
| Q9CQN7 | 39S ribosoma  | 294330  | 240840  | 410260  | 283970  | 180370  |
| P30285 | Cyclin-depen  | 257.81  | 10798   | 18785   | 9028.1  | 4386.8  |
| P62806 | Histone H4 C  | 88265   | 48466   | 541710  | 4601600 | 151650  |
| Q61102 | ATP-binding   | 2496.5  | 4429.1  | 5397.4  | 2159    | 4070.7  |
| Q8BK67 | Protein RCC2  | 30279   | 12690   | 539670  | 48429   | 19582   |
| Q91VA6 | Polymerase c  | 751050  | 953310  | 644930  | 758160  | 507510  |
| Q7TMM9 | Tubulin beta- | 760540  | 461210  | 165390  | 373560  | 840240  |
| Q8VBZ3 | Cleft lip and | 43322   | 20676   | 8685.5  | 30526   | 6296.5  |

|        |                |         |         |         |         |         |
|--------|----------------|---------|---------|---------|---------|---------|
| Q92511 | ATPase famil   | 152340  | 266670  | 119300  | 135870  | 404500  |
| Q99LY9 | NADH dehyd     | 11053   | 8447.6  | 39131   | 10486   | 7832.7  |
| P35486 | Pyruvate def   | 2454800 | 3362200 | 4076700 | 6432000 | 6070800 |
| Q3UJU9 | Regulator of   | 366070  | 436250  | 271950  | 373790  | 1003800 |
| Q8K596 | Sodium/calci   | 4577.5  | 1014.6  | 19801   | 25717   | 23893   |
| O35435 | Dihydroorota   | 214340  | 214610  | 263040  | 211880  | 154540  |
| B2RSH2 | Guanine nucl   | 100990  | 115170  | 78615   | 62025   | 128390  |
| Q8C7K6 | Prenylcysteir  | 13713   | 6095    | 31869   | 24828   | 204070  |
| Q91YJ5 | Translation ir | 51557   | 211200  | 292130  | 278460  | 87647   |
| Q9CPQ8 | ATP synthase   | 15763   | 1118800 | 110780  | 93513   | 3415000 |
| Q3UN04 | Ubiquitin car  | 88731   | 60849   | 68226   | 62831   | 31801   |
| O88696 | ATP-depende    | 1842400 | 2129200 | 2161100 | 1976700 | 1246000 |
| Q8K0Z7 | Translational  | 127580  | 150230  | 354460  | 276910  | 57044   |
| Q9CZU4 | GTPase Era, r  | 26165   | 43176   | 43087   | 27241   | 7490.3  |
| P62751 | 60S ribosoma   | 95955   | 118970  | 132550  | 97827   | 13444   |
| Q80U40 | RIMS-binding   | 6598.1  | 16271   | 9637.3  | 10408   | 19854   |
| P63001 | Ras-related C  | 71564   | 91074   | 37159   | 308360  | 57315   |
| Q78IK4 | MICOS comp     | 29578   | 21194   | 69463   | 22825   | 96251   |
| Q8CHC4 | Synaptojanin   | 10511   | 87787   | 84243   | 25594   | 157690  |
| P14206 | 40S ribosoma   | 113480  | 80524   | 57719   | 74304   | 46004   |
| Q91WD5 | NADH dehyd     | 858400  | 917070  | 800770  | 621550  | 998820  |
| Q9D7X3 | Dual specifici | 7900.5  | 6977.6  | 6684.2  | 14439   | 30880   |
| Q9D023 | Mitochondria   | 32727   | 282030  | 164170  | 117840  | 209310  |
| P36371 | Antigen pept   | 262170  | 25984   | 204880  | 158160  | 132340  |
| Q9DCA2 | 28S ribosoma   | 20696   | 74530   | 107120  | 55017   | 8510.3  |
| Q99MR8 | Methylcrotoi   | 5512.3  | 3573.9  | 12823   | 362.74  | 2404.1  |
| O89053 | Coronin-1A C   | 67402   | 68089   | 40831   | 10226   | 87259   |
| O09106 | Histone deac   | 95044   | 54849   | 73491   | 9319.9  | 42642   |
| Q3ULD5 | Methylcrotoi   | 569500  | 590100  | 644050  | 530130  | 295940  |
| Q91VR2 | ATP synthase   | 3193300 | 3034900 | 3350600 | 3495500 | 3642900 |
| Q9CQF8 | Ribosomal pr   | 24593   | 29151   | 27160   | 31704   | 10513   |
| Q9CZ57 | 5-methylcytc   | 63292   | 68338   | 207640  | 273880  | 78860   |
| Q9QXS6 | Drebrin OS=F   | 162300  | 196030  | 124710  | 87199   | 58689   |
| Q61879 | Myosin-10 O    | 83854   | 57877   | 29923   | 27079   | 15543   |
| Q61644 | Protein kinas  | 7310.8  | 47362   | 12032   | 7528.3  | 45367   |
| Q99KI3 | ER membran     | 38283   | 27581   | 39111   | 37471   | 26573   |
| Q9DBE8 | Alpha-1,3/1,4  | 5481.7  | 3982.7  | 3742.3  | 582.78  | 5627    |
| Q8CGP2 | Histone H2B    | 17465   | 17718   | 41717   | 294020  | 14353   |
| Q8R0Y6 | Cytosolic 10-  | 335880  | 254130  | 55364   | 98405   | 70555   |
| Q9D404 | 3-oxoacyl-[ac  | 143120  | 121420  | 151790  | 104620  | 78329   |
| P51863 | V-type proto   | 53751   | 41089   | 49326   | 26343   | 69009   |
| P35803 | Neuronal me    | 23096   | 15847   | 17503   | 356360  | 20334   |

|        |                |         |         |         |         |         |
|--------|----------------|---------|---------|---------|---------|---------|
| Q8CHT0 | Delta-1-pyrro  | 413360  | 423440  | 505070  | 458070  | 215920  |
| Q4KMM3 | Oxidation res  | 6698.2  | 154700  | 167410  | 31437   | 26918   |
| Q811U4 | Mitofusin-1 C  | 127830  | 83129   | 79041   | 69793   | 36375   |
| Q8R1S0 | Ubiquinone b   | 7298.3  | 5089    | 2920.9  | 6292.2  | 7173.1  |
| P14231 | Sodium/pota    | 317720  | 181880  | 82785   | 159350  | 274800  |
| P42932 | T-complex pr   | 149500  | 178090  | 96299   | 148940  | 95835   |
| P50544 | Very long-ch   | 626270  | 784770  | 809150  | 627250  | 321610  |
| Q00612 | Glucose-6-ph   | 59856   | 15751   | 49017   | 119140  | 69812   |
| Q920P3 | BMP/retinoic   | 312980  | 121280  | 29120   | 134140  | 25156   |
| Q8BGZ1 | Hippocalcin-l  | 5834.6  | 2554.2  | 4807.4  | 6996.9  | 57123   |
| Q9R257 | Heme-bindin    | 44492   | 5865.1  | 10139   | 8571.3  | 24586   |
| P60879 | Synaptosoma    | 273560  | 313350  | 66841   | 106650  | 402750  |
| Q9CY58 | Plasminogen    | 13568   | 18967   | 7012.9  | 8724.5  | 1709.4  |
| P67984 | 60S ribosoma   | 72538   | 41767   | 125410  | 184150  | 36537   |
| Q61171 | Peroxiredoxi   | 6437.1  | 2805.1  | 2278.8  | 3144    | 36612   |
| P63082 | V-type proto   | 31363   | 26814   | 27157   | 34851   | 27153   |
| P63101 | 14-3-3 protei  | 83806   | 131410  | 53005   | 70253   | 51001   |
| P63325 | 40S ribosoma   | 122290  | 8843.5  | 2358.1  | 7094.4  | 2882.9  |
| Q8VCW8 | Acyl-CoA syn   | 8462.9  | 2255.3  | 1406    | 1335.6  | 39131   |
| Q9CZ42 | ATP-depende    | 124560  | 868750  | 96621   | 108030  | 568490  |
| Q9D6J5 | NADH dehyd     | 992680  | 918440  | 978740  | 986720  | 1121400 |
| Q9DCF9 | Translocon-a   | 47573   | 40877   | 38230   | 41447   | 4726.3  |
| Q9EQ20 | Methylmalor    | 475730  | 611790  | 571190  | 346790  | 377870  |
| Q9ERI6 | Retinol dehyd  | 92249   | 216290  | 227300  | 2543400 | 112680  |
| Q8C7X2 | ER membran     | 35462   | 22021   | 31951   | 32981   | 16922   |
| Q8K0S0 | Phytanoyl-Cc   | 1137.5  | 24068   | 11636   | 19553   | 83409   |
| Q99N92 | 39S ribosoma   | 202480  | 201530  | 114060  | 145210  | 119880  |
| Q8VEM8 | Phosphate ca   | 3050600 | 2684600 | 3832000 | 3570300 | 3935000 |
| B7ZMP1 | Probable Xaa   | 1406.7  | 1575.6  | 30218   | 34101   | 939.42  |
| Q02053 | Ubiquitin-like | 21642   | 9130.2  | 5302.2  | 6766.3  | 135930  |
| Q99J25 | rRNA methyl    | 132680  | 162800  | 130300  | 83165   | 21949   |
| P60603 | Reactive oxy   | 156720  | 166350  | 364030  | 346090  | 208800  |
| P61922 | 4-aminobuty    | 391230  | 287410  | 669580  | 630930  | 1276600 |
| Q9DCJ5 | NADH dehyd     | 633090  | 620590  | 908110  | 1393600 | 1545100 |
| Q5M8N0 | CB1 cannabir   | 40459   | 56115   | 28158   | 19809   | 67883   |
| Q9CWX2 | Complex I int  | 160670  | 119230  | 130070  | 246280  | 139450  |
| Q3U2U7 | Methyltransf   | 32215   | 29922   | 5860.5  | 30870   | 5257.1  |
| Q31125 | Zinc transpor  | 1187.8  | 3431.5  | 5601.6  | 1303.3  | 8456.1  |
| P19157 | Glutathione S  | 52112   | 48172   | 25835   | 18143   | 69114   |
| P35980 | 60S ribosoma   | 68054   | 38063   | 31813   | 18351   | 59232   |
| P55302 | Alpha-2-mac    | 53077   | 48554   | 50487   | 36906   | 8128.6  |
| Q8CHH9 | Septin-8 OS=   | 5451    | 920.96  | 26062   | 30675   | 4568.2  |

|        |                       |         |         |         |         |         |
|--------|-----------------------|---------|---------|---------|---------|---------|
| Q8R0S2 | IQ motif and          | 7890.6  | 20471   | 16666   | 20882   | 18237   |
| Q91WK1 | SPRY domain           | 234930  | 386920  | 399020  | 368840  | 227880  |
| Q99J99 | 3-mercaptop           | 403800  | 343820  | 249380  | 584650  | 110980  |
| Q9CZD5 | Translation in        | 52181   | 14281   | 193650  | 84049   | 27629   |
| Q9R088 | Thymidine ki          | 24988   | 39674   | 30564   | 18082   | 48967   |
| O09111 | NADH dehyd            | 410820  | 785940  | 162770  | 148090  | 852650  |
| Q9D051 | Pyruvate def          | 1720900 | 1570500 | 4092800 | 3746200 | 973900  |
| Q9D8Y1 | Transmembr            | 123360  | 691850  | 545630  | 446610  | 196390  |
| P61226 | Ras-related p         | 7024.2  | 7667    | 4351.7  | 4985.9  | 50974   |
| Q9CPQ1 | Cytochrome            | 1050800 | 619450  | 381360  | 1476600 | 991400  |
| Q8VDQ8 | NAD-depend            | 80732   | 62311   | 38788   | 2958.3  | 126910  |
| Q8CI94 | Glycogen pho          | 148120  | 179640  | 345110  | 38450   | 111280  |
| P50171 | Estradiol 17- $\beta$ | 325260  | 139670  | 302240  | 334330  | 98172   |
| P61358 | 60S ribosoma          | 80415   | 96813   | 79512   | 147430  | 50669   |
| Q78IK2 | Up-regulatec          | 4170400 | 6067900 | 6394900 | 6642900 | 3987700 |
| P84099 | 60S ribosoma          | 29675   | 52494   | 27616   | 33228   | 18073   |
| Q6NVE9 | Protein phos          | 214290  | 261040  | 176750  | 116340  | 318000  |
| Q8VDT9 | 39S ribosoma          | 114020  | 140130  | 179610  | 143800  | 87807   |
| Q9CQV5 | 28S ribosoma          | 19067   | 45921   | 169780  | 110900  | 19699   |
| O88544 | COP9 signalo          | 85015   | 8082.6  | 77832   | 300290  | 74978   |
| P12382 | ATP-depende           | 91850   | 77843   | 19943   | 59292   | 99598   |
| Q3KNM2 | E3 ubiquitin-         | 731670  | 390960  | 563280  | 732880  | 518590  |
| Q64133 | Amine oxidas          | 2147900 | 1952100 | 2400300 | 1899600 | 1051700 |
| Q80VL1 | Tudor and Kf          | 4202.9  | 3045.3  | 2387.5  | 5466.7  | 19618   |
| Q920I9 | WD repeat-c           | 1345.5  | 6123.1  | 3472.3  | 2184.8  | 5170.2  |
| Q99JY8 | Phospholipid          | 357350  | 313820  | 309800  | 195210  | 115810  |
| Q99N93 | 39S ribosoma          | 6872.9  | 11522   | 6217.5  | 3966.1  | 35219   |
| P35285 | Ras-related p         | 7650    | 4151.8  | 84608   | 2108.2  | 17419   |
| P11438 | Lysosome-as           | 90090   | 221150  | 97295   | 105130  | 141520  |
| Q3UHD6 | Sorting nexin         | 8173.4  | 1519.4  | 4393.4  | 6593.4  | 6080.9  |
| Q9CQN3 | Mitochondria          | 407540  | 351240  | 142670  | 130690  | 213010  |
| P54227 | Stathmin OS-          | 74175   | 112050  | 79561   | 71645   | 22281   |
| Q9EQI8 | 39S ribosoma          | 18257   | 7878    | 53480   | 63553   | 15237   |
| Q9CQV1 | Mitochondria          | 5110.3  | 36556   | 6931    | 8471.4  | 1847.9  |
| P40630 | Transcriptior         | 326390  | 264760  | 212010  | 267600  | 217180  |
| Q8R127 | Saccharopine          | 9057.7  | 1102.5  | 3795.8  | 5421    | 57238   |
| Q9DAT5 | Mitochondria          | 93074   | 118550  | 117800  | 88343   | 13706   |
| P52503 | NADH dehyd            | 19969   | 22502   | 12940   | 4983.4  | 300120  |
| P97478 | 5-demethoxy           | 119320  | 192650  | 203570  | 256000  | 30472   |
| A2AJ88 | Patatin-like p        | 1701.1  | 20630   | 11241   | 46077   | 5365.3  |
| P47738 | Aldehyde del          | 322820  | 1030300 | 445060  | 309800  | 248240  |
| P62242 | 40S ribosoma          | 10857   | 48064   | 107720  | 169370  | 10700   |

|        |                |         |         |         |         |          |
|--------|----------------|---------|---------|---------|---------|----------|
| Q08331 | Calretinin OS  | 21320   | 22431   | 16273   | 13751   | 22678    |
| Q80ZS3 | 28S ribosoma   | 125290  | 43451   | 127880  | 180670  | 97839    |
| Q9CYI0 | Protein Njmu   | 4556.6  | 4330.5  | 3736.4  | 2242.3  | 14512    |
| Q7TSQ8 | Pyruvate deh   | 848260  | 746280  | 733200  | 563650  | 450050   |
| Q99JI4 | 26S proteasc   | 81661   | 103870  | 150230  | 98508   | 98337    |
| Q02248 | Catenin beta   | 39571   | 69599   | 37163   | 52374   | 73167    |
| Q3UGR5 | Haloacid deh   | 161500  | 8439.5  | 84051   | 10031   | 75319    |
| Q5HZI9 | Solute carrie  | 4060.8  | 5245.3  | 6468.7  | 6140.5  | 6511.7   |
| Q922Q1 | Mitochondria   | 83493   | 96069   | 1326500 | 1160300 | 52707    |
| Q9Z2I9 | Succinate--Co  | 1079200 | 1036500 | 667390  | 510240  | 1517300  |
| Q9DCT2 | NADH dehyd     | 6393200 | 9014300 | 5462800 | 2311400 | 10265000 |
| P09405 | Nucleolin OS   | 5303.7  | 17645   | 23937   | 9746.9  | 19616    |
| P10126 | Elongation fa  | 15994   | 15090   | 25142   | 29674   | 21600    |
| P35979 | 60S ribosoma   | 157230  | 130890  | 151760  | 323150  | 168940   |
| Q9CQF0 | 39S ribosoma   | 113770  | 181820  | 74178   | 3147.3  | 6266.7   |
| P01837 | Ig kappa chai  | 198370  | 243620  | 91332   | 86707   | 147330   |
| P29758 | Ornithine am   | 161800  | 80415   | 118390  | 45757   | 90157    |
| P50543 | Protein S100   | 62433   | 33873   | 28673   | 54111   | 5562.9   |
| P57776 | Elongation fa  | 168440  | 121170  | 115890  | 148540  | 81638    |
| Q61387 | Cytochrome     | 269980  | 314220  | 325330  | 390330  | 157590   |
| Q8BQJ6 | tRNA (uracil)  | 13059   | 6036.1  | 238680  | 179620  | 19376    |
| Q91VR7 | Microtubule-   | 9234    | 6871.8  | 13973   | 8650.3  | 25470    |
| Q9CZR3 | Mitochondria   | 45918   | 12670   | 19894   | 235130  | 12566    |
| Q9D1D4 | Transmembr     | 4235    | 4780.6  | 16681   | 4576.3  | 33753    |
| Q9DB73 | NADH-cytoch    | 764.82  | 4841.2  | 6149.8  | 4729.8  | 5029.6   |
| P60335 | Poly(rC)-bind  | 33815   | 37314   | 41324   | 47215   | 12269    |
| P19096 | Fatty acid syr | 165210  | 173660  | 57224   | 20122   | 67807    |
| Q61235 | Beta-2-syntro  | 4468.5  | 1372.9  | 3557.5  | 176860  | 4498     |
| Q91YQ5 | Dolichyl-diph  | 112220  | 156560  | 206850  | 232940  | 134610   |
| Q9CQB5 | CDGSH iron-s   | 181070  | 4361.7  | 35984   | 48616   | 32030    |
| Q9DBG6 | Dolichyl-diph  | 4355.5  | 2535.9  | 6511.2  | 6021.2  | 59897    |
| P28660 | Nck-associat   | 32417   | 156810  | 124860  | 73891   | 11295    |
| Q14CH7 | Alanine--tRN   | 78282   | 96939   | 102820  | 67246   | 42617    |
| Q9CR98 | Protein FAM1   | 12096   | 86634   | 31196   | 214650  | 158210   |
| Q9WTT4 | V-type proto   | 45976   | 9805.4  | 18697   | 13798   | 33619    |
| P97370 | Sodium/pota    | 1848    | 4586.3  | 1765.4  | 1495.6  | 46680    |
| Q80ZK0 | 28S ribosoma   | 158860  | 133610  | 164520  | 131170  | 65116    |
| Q8BGC4 | Prostaglandin  | 252660  | 232920  | 514180  | 429430  | 172230   |
| O35633 | Vesicular inh  | 2004.9  | 7582.8  | 2223.8  | 9021.1  | 3321.8   |
| P35438 | Glutamate re   | 211540  | 165500  | 223480  | 349730  | 189410   |
| Q80TZ3 | Putative tyro  | 16649   | 23175   | 12000   | 29137   | 42990    |
| P26883 | Peptidyl-prol  | 193360  | 146430  | 183340  | 383880  | 243920   |

|        |               |         |          |         |         |         |
|--------|---------------|---------|----------|---------|---------|---------|
| Q9D2R6 | Cytochrome    | 713190  | 634290   | 642710  | 714100  | 415670  |
| P62852 | 40S ribosoma  | 36635   | 15659    | 47851   | 128860  | 31878   |
| Q9CWG8 | Protein argin | 158040  | 147960   | 149120  | 109210  | 75919   |
| Q921G7 | Electron tran | 4157.4  | 4273.8   | 3779.6  | 4590.4  | 4256.3  |
| Q8VE33 | Ganglioside-i | 89116   | 121250   | 45172   | 52245   | 47177   |
| Q8BU88 | 39S ribosoma  | 281850  | 471520   | 417780  | 394270  | 209850  |
| Q9CQZ6 | NADH dehyd    | 853030  | 566480   | 874220  | 3042700 | 1299000 |
| P63328 | Serine/threo  | 42022   | 4305.5   | 5252.9  | 25542   | 47495   |
| Q9JIK9 | 28S ribosoma  | 10658   | 16729    | 30371   | 354270  | 10206   |
| Q07646 | Mesoderm-s    | 3912.8  | 2228.9   | 13295   | 3045.3  | 1416.1  |
| P15105 | Glutamine sy  | 263680  | 221950   | 81331   | 590530  | 329670  |
| P26443 | Glutamate de  | 9986200 | 15676000 | 8513200 | 7143000 | 5831700 |
| P61027 | Ras-related p | 53032   | 65151    | 39467   | 34864   | 479510  |
| Q91V41 | Ras-related p | 53255   | 74525    | 41968   | 29417   | 61835   |
| P84228 | Histone H3.2  | 1599.6  | 2336.5   | 2600.3  | 120430  | 1646    |
| O88741 | Ganglioside-i | 3176900 | 3017400  | 2756000 | 2455300 | 2566600 |
| Q8BGH2 | Sorting and a | 5824.8  | 4793.4   | 6929.8  | 2744.8  | 75671   |
| Q80SW1 | S-adenosylhc  | 6665.9  | 4438.2   | 6834.5  | 23431   | 3031.5  |
| O35526 | Syntaxin-1A ( | 17609   | 10510    | 16991   | 17476   | 17370   |
| Q3U5Q7 | UMP-CMP ki    | 103790  | 201780   | 493500  | 265920  | 158780  |
| Q9D338 | 39S ribosoma  | 56316   | 43491    | 85473   | 78028   | 3850.1  |
| P62911 | 60S ribosoma  | 6512.7  | 6110.9   | 25988   | 108990  | 12272   |
| A6H611 | Mitochondria  | 96190   | 111660   | 178760  | 175960  | 69480   |
| O55126 | Protein NipSi | 369830  | 537630   | 474410  | 93146   | 294190  |
| P17047 | Lysosome-as   | 97116   | 113230   | 10220   | 57394   | 16246   |
| Q9JLM8 | Serine/threo  | 289530  | 197770   | 104490  | 106270  | 68703   |
| Q3UQ84 | Threonine--tl | 26658   | 28388    | 169090  | 153030  | 7045.3  |
| P47963 | 60S ribosoma  | 624890  | 635590   | 150490  | 859710  | 782530  |
| Q9WV92 | Band 4.1-like | 197520  | 17689    | 192710  | 340790  | 69101   |
| Q8VCH8 | UBX domain-   | 44612   | 31624    | 30472   | 21643   | 21142   |
| P62897 | Cytochrome    | 98055   | 98860    | 66253   | 100100  | 210740  |
| Q9WVA2 | Mitochondria  | 39857   | 94227    | 185580  | 109340  | 78450   |
| Q64520 | Guanylate kii | 4455.4  | 38232    | 11031   | 23122   | 16013   |
| Q8R404 | MICOS comp    | 1582.3  | 3346.9   | 5495.5  | 26098   | 1128.4  |
| O08553 | Dihydropyrim  | 840480  | 1107700  | 360260  | 319630  | 920300  |
| P03899 | NADH-ubiqui   | 300290  | 212180   | 1068800 | 1212100 | 53956   |
| O70318 | Band 4.1-like | 3121    | 16281    | 11322   | 15973   | 23637   |
| Q5U458 | DnaJ homolo   | 499040  | 661460   | 1099100 | 820750  | 187510  |
| Q9QYR9 | Acyl-coenzym  | 8543.9  | 132540   | 17976   | 23634   | 38204   |
| P62908 | 40S ribosoma  | 74209   | 49671    | 72355   | 76267   | 25724   |
| P23506 | Protein-L-iso | 14307   | 28705    | 4841.2  | 2828.9  | 20023   |
| P62889 | 60S ribosoma  | 43342   | 81834    | 199340  | 154840  | 50707   |

|        |                |         |         |         |         |         |
|--------|----------------|---------|---------|---------|---------|---------|
| Q9D7P6 | Iron-sulfur cl | 43177   | 166940  | 237730  | 277440  | 26275   |
| P97493 | Thioredoxin,   | 644740  | 635150  | 922440  | 911640  | 470900  |
| P36552 | Oxygen-depe    | 31384   | 39380   | 107110  | 88178   | 8888.3  |
| P47911 | 60S ribosoma   | 73237   | 116810  | 81870   | 94009   | 65994   |
| Q924L1 | LETM1 doma     | 399590  | 666650  | 917070  | 1007500 | 442250  |
| Q9JLJ2 | 4-trimethyla   | 51680   | 62948   | 75460   | 91195   | 80878   |
| Q91YP2 | Neurolysin, r  | 137300  | 118540  | 82334   | 60032   | 83369   |
| Q91WK5 | Glycine cleav  | 115450  | 110260  | 661160  | 531770  | 47387   |
| Q9DBS2 | Tumor prote    | 20185   | 4707.1  | 8016.6  | 6854    | 19407   |
| Q8BYM8 | Probable cys   | 29608   | 57189   | 55278   | 109050  | 80074   |
| Q9Z1G3 | V-type proto   | 73305   | 117130  | 102110  | 18660   | 85916   |
| P50396 | Rab GDP diss   | 47986   | 15700   | 9221.3  | 68989   | 140100  |
| PODN34 | NADH dehyd     | 400420  | 386090  | 374110  | 688630  | 466540  |
| Q920A7 | AFG3-like pro  | 7981.5  | 2973    | 68856   | 12770   | 9444.3  |
| P11352 | Glutathione p  | 102280  | 31386   | 110750  | 131530  | 100630  |
| Q9R0P6 | Signal peptid  | 51915   | 63367   | 93635   | 195600  | 43176   |
| Q9WV96 | Mitochondria   | 259160  | 165270  | 234000  | 268470  | 173340  |
| Q9ESW4 | Acylglycerol l | 2638000 | 2425300 | 2462300 | 2359300 | 1537100 |
| P12367 | cAMP-depen     | 1564.4  | 61100   | 1331.4  | 11968   | 4944.4  |
| P35762 | CD81 antiger   | 125710  | 144800  | 86423   | 83407   | 195280  |
| Q9R111 | Guanine dea    | 42897   | 20136   | 12499   | 18060   | 41648   |
| Q80X85 | 28S ribosoma   | 302740  | 338920  | 329590  | 311780  | 150410  |
| Q9D0L4 | Uncharacteri   | 147060  | 129260  | 169540  | 173620  | 67118   |
| Q8BGB8 | Ubiquinone b   | 96839   | 159170  | 141290  | 155140  | 119050  |
| Q9D8V7 | Signal peptid  | 12673   | 53120   | 5948.4  | 17443   | 38692   |
| Q78YY6 | DnaJ homolo    | 82598   | 63211   | 110190  | 133030  | 74143   |
| Q9D0G0 | 28S ribosoma   | 3755.5  | 7185.2  | 139360  | 69660   | 16468   |
| P62141 | Serine/threo   | 14677   | 1944.2  | 17988   | 40750   | 3622.4  |
| Q9QZ23 | NFU1 iron-su   | 1142500 | 1248700 | 1078900 | 843730  | 423010  |
| Q8R0F8 | Acylpyruvase   | 26574   | 24331   | 73781   | 63010   | 416610  |
| Q9ER88 | 28S ribosoma   | 117840  | 681220  | 177660  | 118250  | 641610  |
| Q9CQ91 | NADH dehyd     | 373280  | 357870  | 884340  | 970080  | 584080  |
| Q9WVK8 | Cholesterol 2  | 92178   | 43527   | 91427   | 40668   | 135600  |
| Q99JI6 | Ras-related p  | 121240  | 45708   | 5693.6  | 23707   | 350.03  |
| P45878 | Peptidyl-prol  | 150820  | 144160  | 186340  | 174320  | 133160  |
| Q8JZU2 | Tricarboxylat  | 919710  | 950550  | 1186700 | 1016700 | 285040  |
| Q9D6M3 | Mitochondria   | 2513300 | 3143300 | 5695200 | 6181500 | 3615200 |
| Q99JY9 | Actin-related  | 9808    | 41384   | 16603   | 26871   | 30102   |
| Q9CQL5 | 39S ribosoma   | 29085   | 18551   | 20064   | 2585    | 9351.1  |
| Q9DCV4 | Regulator of   | 506670  | 456260  | 407490  | 335020  | 329760  |
| Q9CWB7 | Glutaredoxin   | 5945.5  | 3379.7  | 5446.4  | 1987.4  | 477.55  |
| Q9Z2Y3 | Homer prote    | 35900   | 49441   | 28705   | 59343   | 78674   |

|        |                |         |         |         |         |         |
|--------|----------------|---------|---------|---------|---------|---------|
| O88441 | Metaxin-2 O    | 28415   | 22978   | 23188   | 32728   | 13615   |
| Q8R317 | Ubiquilin-1 C  | 3317.9  | 2108.9  | 5095.8  | 8643.1  | 5712.5  |
| P52825 | Carnitine O-p  | 395320  | 677240  | 200260  | 207740  | 193930  |
| Q9DBL7 | Bifunctional   | 4156.5  | 21567   | 22055   | 4096.1  | 11238   |
| Q9ERD7 | Tubulin beta   | 165370  | 164180  | 64691   | 90549   | 82614   |
| Q8BGX2 | Mitochondria   | 313950  | 355870  | 329840  | 284510  | 259840  |
| Q9D2R8 | 28S ribosoma   | 97556   | 90507   | 45820   | 74374   | 39515   |
| Q6R0H7 | Guanine nucl   | 146090  | 48621   | 118110  | 98796   | 83670   |
| Q8JZN7 | Mitochondria   | 4176.9  | 3813.7  | 97368   | 66199   | 6097    |
| Q9D1H8 | 39S ribosoma   | 40486   | 74897   | 294640  | 695870  | 37684   |
| Q9DBL1 | Short/branch   | 446210  | 498530  | 479430  | 331630  | 309210  |
| P47708 | Rabphilin-3A   | 55905   | 30667   | 113570  | 81024   | 71082   |
| O88396 | GrpE protein   | 63678   | 58019   | 63382   | 43709   | 24107   |
| P63030 | Mitochondria   | 92914   | 31963   | 32669   | 177380  | 142830  |
| Q8K370 | Acyl-CoA de    | 7333.3  | 56088   | 61813   | 48504   | 54579   |
| Q8BGF9 | Solute carrier | 13716   | 18637   | 23227   | 30429   | 30460   |
| P06745 | Glucose-6-ph   | 25091   | 23044   | 19557   | 76900   | 15689   |
| P56391 | Cytochrome     | 59451   | 121890  | 5118000 | 4487200 | 29959   |
| Q08943 | FACT comple    | 28211   | 5206.6  | 40582   | 40102   | 18812   |
| P17426 | AP-2 comple    | 130450  | 137020  | 145560  | 108730  | 154400  |
| O08709 | Peroxiredoxi   | 7432.6  | 22838   | 2201.4  | 6936.2  | 13242   |
| P47791 | Glutathione    | 221830  | 133540  | 85169   | 139650  | 99507   |
| Q8K1J6 | CCA tRNA nu    | 54712   | 52527   | 15892   | 48505   | 12545   |
| P57759 | Endoplasmic    | 103730  | 215290  | 266440  | 253400  | 81827   |
| Q99N28 | Cell adhesior  | 7151    | 6377.8  | 8635.9  | 27931   | 8159.5  |
| Q9WTP7 | GTP:AMP ph     | 1567500 | 1507100 | 1402300 | 1124200 | 1169600 |
| Q8BUV3 | Gephyrin OS    | 13961   | 40491   | 24478   | 21096   | 38615   |
| Q9JKW0 | ADP-ribosyla   | 9797    | 3005.5  | 11919   | 44885   | 8571.2  |
| Q66GT5 | Phosphatidyl   | 11049   | 727.48  | 14274   | 1300.9  | 11067   |
| Q99N84 | 28S ribosoma   | 90513   | 65033   | 40134   | 25225   | 27042   |
| Q9CXW2 | 28S ribosoma   | 170400  | 161160  | 127080  | 120390  | 80103   |
| A2APY7 | Arginine-hyd   | 119410  | 123690  | 216470  | 206970  | 71621   |
| Q9JIA1 | Leucine-rich   | 30729   | 38150   | 31842   | 54560   | 18216   |
| Q8R3Q6 | Coiled-coil d  | 126190  | 114040  | 261600  | 270870  | 110650  |
| O35683 | NADH dehyd     | 129060  | 28876   | 25569   | 41451   | 39651   |
| P43276 | Histone H1.5   | 17148   | 13893   | 12328   | 76499   | 18809   |
| P52196 | Thiosulfate s  | 2748800 | 2249500 | 1725400 | 1330200 | 807740  |
| P62270 | 40S ribosoma   | 52476   | 31139   | 30173   | 104440  | 19884   |
| Q3TDK6 | Protein rogdi  | 1262700 | 1103600 | 630250  | 869860  | 27109   |
| Q60902 | Epidermal gr   | 3823    | 3356.2  | 9479.8  | 4983.7  | 6273.6  |
| Q8BG51 | Mitochondria   | 445740  | 492900  | 461360  | 474560  | 451990  |
| Q8BSY0 | Aspartyl/asp   | 93773   | 50567   | 71063   | 19309   | 12583   |



|        |                    |         |         |         |         |         |
|--------|--------------------|---------|---------|---------|---------|---------|
| Q9CZ30 | Obg-like ATP       | 6982.5  | 94274   | 7090.6  | 44743   | 277.96  |
| P31648 | Sodium- and        | 171260  | 128620  | 117670  | 108940  | 169470  |
| O35643 | AP-1 comple:       | 63321   | 36924   | 140490  | 93664   | 68082   |
| Q9D8W7 | OCIA domain        | 17721   | 11219   | 13001   | 41773   | 4933.5  |
| O70443 | Guanine nucl       | 136840  | 25948   | 12590   | 49749   | 178930  |
| P40124 | Adenylyl cycl      | 51586   | 31273   | 26203   | 98179   | 3535.6  |
| Q8BJZ4 | 28S ribosoma       | 1674.3  | 16334   | 2519.1  | 6719.3  | 605.84  |
| Q8BTE5 | Protein CEBP       | 5270.8  | 15516   | 7671.8  | 12008   | 642.49  |
| O35459 | Delta(3,5)-De      | 205170  | 287600  | 233730  | 203710  | 25945   |
| Q8CH72 | E3 ubiquitin-      | 50492   | 20523   | 52771   | 733320  | 176140  |
| Q02819 | Nucleobindir       | 2091.7  | 19620   | 12583   | 1868.5  | 12129   |
| P38060 | Hydroxymetf        | 368610  | 371080  | 154930  | 171160  | 154330  |
| O88455 | 7-dehydroch        | 18146   | 6289.1  | 47579   | 82709   | 5274.5  |
| P80318 | T-complex pr       | 307910  | 245560  | 145710  | 102430  | 204870  |
| P97742 | Carnitine O- $\mu$ | 3265.8  | 3393.1  | 4828    | 26562   | 28998   |
| Q64105 | Sepiapterin r      | 46870   | 64361   | 33755   | 35092   | 67086   |
| Q9CY28 | GTP-binding        | 32662   | 19792   | 74502   | 7334    | 75294   |
| Q9CYR0 | Single-strand      | 7981.3  | 12733   | 5887.1  | 15118   | 20333   |
| Q9D2G2 | Dihydrolipoy       | 1974700 | 1681400 | 1222300 | 1088900 | 2598400 |
| P63038 | 60 kDa heat :      | 3256800 | 9811000 | 6141900 | 2750000 | 6113800 |
| Q61735 | Leukocyte su       | 64712   | 37946   | 53484   | 73988   | 59861   |
| Q61792 | LIM and SH3        | 162390  | 131650  | 139150  | 214660  | 114410  |
| Q8R5J9 | PRA1 family        | 48492   | 41729   | 44801   | 15759   | 24085   |
| P14824 | Annexin A6 C       | 4783.4  | 4864.6  | 45537   | 9095.4  | 4820.1  |
| Q99M87 | DnaJ homolo        | 1395100 | 1523300 | 1552500 | 1270700 | 1221300 |
| Q9R112 | Sulfide:quinc      | 59893   | 28552   | 3176.9  | 27196   | 24844   |
| P26645 | Myristoylate       | 45384   | 29393   | 31934   | 28275   | 7362.6  |
| Q11011 | Puromycin-se       | 137850  | 180580  | 186710  | 176810  | 97524   |
| Q2TBE6 | Phosphatidyl       | 82508   | 20630   | 52603   | 1547.7  | 12980   |
| Q9D517 | 1-acyl-sn-gly      | 8944.2  | 5437.4  | 2828.6  | 7007.5  | 1675    |
| P53026 | 60S ribosoma       | 25881   | 18188   | 19789   | 11158   | 17364   |
| Q9D880 | Mitochondria       | 898420  | 1739100 | 910260  | 1070800 | 941190  |
| P51881 | ADP/ATP tra        | 5728800 | 4444000 | 7967900 | 6807100 | 2678600 |
| Q76MZ3 | Serine/threo       | 14426   | 2967.7  | 7789.8  | 8615.9  | 73674   |
| P22315 | Ferrochelata       | 14000   | 11380   | 38849   | 74061   | 20943   |
| P13707 | Glycerol-3-ph      | 3448.5  | 3756    | 25827   | 22082   | 21007   |
| P28571 | Sodium- and        | 27296   | 5922.2  | 63680   | 247900  | 35896   |
| Q8R3F5 | Malonyl-CoA        | 50034   | 58776   | 22139   | 9616.8  | 26136   |
| Q9JJV2 | Profilin-2 OS      | 555120  | 52637   | 366620  | 113090  | 106530  |
| Q60870 | Receptor exp       | 20726   | 18419   | 70015   | 75846   | 12718   |
| Q8BRT1 | CLIP-associat      | 711740  | 922000  | 6707.4  | 755970  | 962010  |
| Q9D0M3 | Cytochrome         | 3444300 | 4131800 | 2807500 | 2093800 | 2799300 |

|        |                |         |        |        |         |         |
|--------|----------------|---------|--------|--------|---------|---------|
| P62830 | 60S ribosoma   | 4341.7  | 19566  | 23078  | 90138   | 17731   |
| Q80YD1 | ATP-depende    | 453160  | 280270 | 196840 | 170220  | 180470  |
| Q3THW5 | Histone H2A.   | 68469   | 9975.5 | 35965  | 73088   | 36236   |
| Q8K2M0 | 39S ribosoma   | 148630  | 139310 | 111240 | 113710  | 87464   |
| Q9WUD1 | STIP1 homolo   | 15046   | 1970.9 | 5357.7 | 14095   | 2642.3  |
| Q8VCF0 | Mitochondria   | 6775.6  | 11249  | 26277  | 7032.5  | 14554   |
| P62962 | Profilin-1 OS  | 35744   | 141070 | 18798  | 38006   | 86241   |
| P10630 | Eukaryotic in  | 13164   | 51431  | 37590  | 438570  | 59361   |
| O70579 | Peroxisomal    | 93011   | 92277  | 111620 | 84555   | 169710  |
| P35564 | Calnexin OS=   | 155210  | 320930 | 181400 | 127420  | 75744   |
| Q99L04 | Dehydrogena    | 20692   | 13026  | 185410 | 145970  | 6336.7  |
| Q9D7N3 | 28S ribosoma   | 190570  | 344830 | 257790 | 225570  | 142620  |
| Q9Z2U0 | Proteasome :   | 5331.4  | 103590 | 193280 | 208550  | 13653   |
| P17427 | AP-2 comple    | 145090  | 108080 | 79640  | 99734   | 79102   |
| P50136 | 2-oxoisovaler  | 298650  | 572510 | 352110 | 326740  | 380830  |
| Q8K4F5 | Protein ABHE   | 44377   | 129830 | 260570 | 64007   | 161410  |
| Q9CPY7 | Cytosol amin   | 82162   | 76292  | 219040 | 147570  | 103590  |
| Q8BFP9 | [Pyruvate de   | 589900  | 717780 | 762210 | 506660  | 845460  |
| O08547 | Vesicle-traffi | 46455   | 7649.2 | 27670  | 1536.2  | 101100  |
| P70349 | Histidine tria | 1160900 | 61889  | 54874  | 3647900 | 1015500 |
| Q00493 | Carboxypept    | 98373   | 99328  | 110730 | 99166   | 47749   |
| P26231 | Catenin alpha  | 61842   | 41051  | 29344  | 12735   | 37091   |
| Q811P8 | Rho GTPase-    | 25447   | 25255  | 51247  | 56815   | 4841.6  |
| O55022 | Membrane-a     | 50773   | 24638  | 53088  | 36733   | 9698.7  |
| Q3UFY8 | Mitochondria   | 23415   | 35334  | 51431  | 34529   | 16240   |
| Q99PJ0 | Neurotrimin    | 133080  | 26862  | 110700 | 100300  | 141650  |
| Q9D1R1 | Complex I as   | 78188   | 85610  | 68666  | 76137   | 68846   |
| Q9D8B4 | NADH dehyd     | 170270  | 420440 | 353240 | 177250  | 79839   |
| P10639 | Thioredoxin (  | 50274   | 54777  | 25583  | 25371   | 45375   |
| P16546 | Spectrin alph  | 171660  | 197370 | 168580 | 160630  | 228940  |
| P46638 | Ras-related p  | 253370  | 196420 | 144030 | 156610  | 127210  |
| Q80YN3 | Breast carcin  | 11626   | 9036.1 | 6666.1 | 11287   | 7260.9  |
| Q9CZP5 | Mitochondria   | 143850  | 113160 | 85262  | 29767   | 198530  |
| Q9JKL4 | NADH dehyd     | 182460  | 194340 | 268960 | 260200  | 187500  |
| O55028 | [3-methyl-2-c  | 38080   | 5279.6 | 51740  | 4332.4  | 54449   |
| P26041 | Moesin OS=M    | 1041.7  | 31995  | 19353  | 5186.8  | 33009   |
| P31324 | cAMP-depen     | 28729   | 34609  | 23702  | 23516   | 9099.9  |
| P62880 | Guanine nucl   | 22189   | 68949  | 38820  | 96985   | 38586   |
| Q62443 | Neuronal per   | 1545.6  | 18122  | 4166.3 | 9633    | 1549.1  |
| Q8BSS9 | Liprin-alpha-  | 139470  | 30851  | 50439  | 28966   | 35638   |
| Q9D0L7 | Armadillo rep  | 191240  | 330240 | 264320 | 347000  | 209160  |
| Q91W43 | Glycine dehy   | 14433   | 69464  | 84223  | 2488    | 14171   |

|        |                |         |         |         |         |         |
|--------|----------------|---------|---------|---------|---------|---------|
| Q91ZA3 | Propionyl-Co   | 458340  | 515540  | 443230  | 206000  | 595960  |
| P61089 | Ubiquitin-cor  | 119640  | 106330  | 63953   | 115630  | 155590  |
| P68181 | cAMP-depen     | 3850.7  | 11537   | 2975.6  | 2665.7  | 4739.4  |
| Q4ACU6 | SH3 and mul    | 12277   | 31678   | 3804.9  | 6112.7  | 8461.9  |
| Q9CQZ5 | NADH dehyd     | 1754300 | 2588800 | 2759400 | 2694200 | 2775600 |
| Q4VAE3 | Transmembr     | 2914700 | 2588900 | 2198700 | 2285100 | 2862500 |
| O89112 | LanC-like pro  | 98895   | 64384   | 59011   | 61040   | 101470  |
| Q6ZQ38 | Cullin-associ  | 75790   | 81628   | 46681   | 52349   | 77376   |
| Q8R0A7 | Uncharacteri   | 24235   | 26604   | 87247   | 233280  | 31171   |
| Q99L13 | 3-hydroxyiso   | 327640  | 401380  | 377720  | 332320  | 487160  |
| Q9CVB6 | Actin-related  | 17810   | 23261   | 15764   | 24580   | 4840.4  |
| Q9CXI0 | 2-methoxy-6    | 89090   | 25928   | 46938   | 38956   | 26747   |
| Q9DB20 | ATP synthase   | 6549700 | 8174100 | 3398700 | 2934500 | 7473300 |
| Q9QWI6 | SRC kinase si  | 16668   | 16149   | 7053.7  | 15450   | 16409   |
| Q9JHI5 | Isovaleryl-Co  | 34888   | 57636   | 82998   | 124690  | 22240   |
| Q8K411 | Presequence    | 211120  | 364080  | 305110  | 172530  | 191780  |
| Q8VDP6 | CDP-diacylgl   | 106710  | 116950  | 74613   | 61317   | 165640  |
| O35857 | Mitochondri    | 1171200 | 1160500 | 1009400 | 1099800 | 1149600 |
| Q3TIU4 | 2',5'-phosph   | 33927   | 101960  | 64872   | 45674   | 47223   |
| Q8BGN3 | Ectonucleoti   | 64958   | 66068   | 40127   | 6744.3  | 62824   |
| Q9CR26 | Vacuolar pro   | 1652.4  | 26553   | 3469    | 16759   | 2290.3  |
| P56382 | ATP synthase   | 126890  | 52172   | 81364   | 419960  | 193800  |
| Q8CFI5 | Probable pro   | 9480.3  | 22700   | 19080   | 6642.5  | 56940   |
| Q8BWF0 | Succinate-se   | 1181800 | 1467600 | 1880300 | 1497100 | 1416700 |
| P80314 | T-complex pr   | 82232   | 105450  | 34105   | 28107   | 44684   |
| Q71RI9 | Kynurenine--   | 209670  | 217760  | 149990  | 135780  | 145510  |
| P62874 | Guanine nucl   | 27996   | 166740  | 78046   | 122620  | 124470  |
| Q61207 | Prosaposin C   | 8566.1  | 44459   | 228020  | 231060  | 16085   |
| O35129 | Prohibitin-2 ( | 2239100 | 2195900 | 1137000 | 1124400 | 1140000 |
| O70172 | Phosphatidyl   | 5027.9  | 21005   | 1514.6  | 3968.8  | 3521.6  |
| P51150 | Ras-related p  | 55284   | 94156   | 11936   | 98575   | 106840  |
| Q14C51 | Pentatricope   | 125170  | 111820  | 177430  | 174280  | 77849   |
| Q60649 | Caseinolytic   | 69557   | 110610  | 107180  | 76917   | 69456   |
| Q62261 | Spectrin beta  | 91140   | 139730  | 41435   | 49152   | 148700  |
| Q8CHU3 | Epsin-2 OS=N   | 4975.5  | 6439.1  | 1402.9  | 6373.9  | 10805   |
| P45377 | Aldose reduc   | 19583   | 8695.8  | 7970.1  | 20166   | 14044   |
| O35943 | Frataxin, mit  | 250520  | 240460  | 263070  | 365500  | 173170  |
| P61205 | ADP-ribosyla   | 287600  | 276150  | 134030  | 125920  | 222410  |
| P63216 | Guanine nucl   | 8556.8  | 12546   | 13786   | 18278   | 31430   |
| P63318 | Protein kinas  | 185990  | 48485   | 43706   | 124600  | 162220  |
| Q60597 | 2-oxoglutara   | 855540  | 1152600 | 1256100 | 788690  | 997980  |
| Q9D1P0 | 39S ribosoma   | 71842   | 91122   | 57990   | 26232   | 7999.9  |

|        |                |         |         |         |         |         |
|--------|----------------|---------|---------|---------|---------|---------|
| Q9QYA2 | Mitochondri    | 622630  | 785030  | 622610  | 447610  | 392020  |
| Q9JKC6 | Cell cycle exi | 5669900 | 5468800 | 5468600 | 5020700 | 5675400 |
| Q924T2 | 28S ribosoma   | 210170  | 129230  | 114900  | 51388   | 71367   |
| Q9CZX8 | 40S ribosoma   | 31228   | 32230   | 38508   | 93286   | 23499   |
| Q91V14 | Solute carrie  | 184110  | 106540  | 197070  | 118240  | 92773   |
| P23819 | Glutamate re   | 318200  | 161050  | 95995   | 156820  | 271990  |
| P09103 | Protein disulf | 131850  | 238710  | 142940  | 32417   | 36070   |
| P80315 | T-complex pr   | 169560  | 207170  | 102450  | 118220  | 125930  |
| Q3TXS7 | 26S proteasc   | 11181   | 19997   | 6477.1  | 32271   | 25828   |
| Q61753 | D-3-phospho    | 371910  | 378170  | 158910  | 171990  | 310540  |
| Q8BK30 | NADH dehyd     | 131120  | 112270  | 485170  | 421520  | 138190  |
| Q60930 | Voltage-depe   | 3695900 | 4284300 | 5307200 | 4222700 | 5013900 |
| Q8CCB4 | Vacuolar pro   | 23517   | 7259.9  | 1641    | 3390.4  | 15320   |
| Q91VC9 | Growth horn    | 12289   | 10075   | 3973.8  | 34116   | 1442.8  |
| Q9WTR5 | Cadherin-13    | 112220  | 105220  | 58443   | 19033   | 58684   |
| Q99NB1 | Acetyl-coenz   | 223620  | 50081   | 114190  | 138540  | 55360   |
| P70168 | Importin sub   | 31082   | 5667.3  | 8273.5  | 9403.8  | 91990   |
| Q8K2K6 | Arf-GAP dom    | 19015   | 27589   | 1814.9  | 15880   | 17458   |
| Q9DCZ4 | MICOS comp     | 4582800 | 3932700 | 5603300 | 5491700 | 4068400 |
| Q9JME5 | AP-3 comple    | 44426   | 41767   | 13067   | 47752   | 52596   |
| Q3U2A8 | Valine--tRNA   | 196710  | 257190  | 192450  | 149780  | 168910  |
| Q61166 | Microtubule-   | 48972   | 45101   | 16263   | 5207.7  | 84196   |
| Q63844 | Mitogen-acti   | 58780   | 50442   | 20864   | 7354.4  | 62785   |
| Q8JZN5 | Acyl-CoA def   | 553570  | 568910  | 603740  | 530680  | 691010  |
| Q922G0 | Solute carrie  | 24617   | 6384    | 48584   | 69514   | 2586.3  |
| Q8BYM5 | Neuroigin-3    | 82785   | 12979   | 6983.7  | 5735.8  | 30419   |
| Q05816 | Fatty acid-bir | 9038.7  | 16401   | 47154   | 43814   | 10568   |
| P21278 | Guanine nucl   | 102270  | 129810  | 95089   | 70521   | 49524   |
| Q99PT1 | Rho GDP-dis    | 63329   | 22594   | 12782   | 32422   | 25180   |
| Q9JHU4 | Cytoplasmic    | 303990  | 246390  | 96651   | 37651   | 152040  |
| Q8BKY8 | Transcriptior  | 47228   | 70934   | 171820  | 177280  | 61671   |
| P61804 | Dolichyl-diph  | 25769   | 40287   | 58616   | 43635   | 40353   |
| P07724 | Serum album    | 409260  | 295580  | 520170  | 441160  | 170540  |
| P63037 | DnaJ homolo    | 7680.4  | 21696   | 1062.8  | 79660   | 15096   |
| Q924D0 | Reticulon-4-i  | 55814   | 37544   | 48590   | 142190  | 68635   |
| Q3U6U5 | Putative GTP   | 19963   | 29976   | 17771   | 5508    | 13165   |
| P35293 | Ras-related p  | 205630  | 232290  | 88658   | 76455   | 106300  |
| Q9Z0H1 | WD repeat-c    | 19098   | 22566   | 27555   | 59096   | 11660   |
| Q80U28 | MAP kinase-i   | 41979   | 5389.2  | 4019.2  | 9835.5  | 14701   |
| Q8VEG4 | Exonuclease    | 56673   | 50544   | 59387   | 102340  | 116740  |
| Q91YP0 | L-2-hydroxyg   | 257840  | 211850  | 202580  | 190990  | 449700  |
| Q9D6S7 | Ribosome-re    | 340730  | 272010  | 405790  | 318290  | 356780  |

|        |                |          |          |          |          |          |
|--------|----------------|----------|----------|----------|----------|----------|
| P70296 | Phosphatidyl   | 249140   | 236300   | 131960   | 112850   | 251960   |
| Q3V1U8 | ELMO domai     | 111560   | 39526    | 88815    | 76285    | 112800   |
| Q8BU30 | Isoleucine--tl | 1056.9   | 6104.2   | 19999    | 2510.4   | 23634    |
| Q9CQY6 | Ubiquinol-cy   | 145940   | 187160   | 257450   | 186330   | 183190   |
| Q99LX0 | Protein DJ-1   | 100900   | 152690   | 69460    | 22451    | 172170   |
| Q9DCB8 | Iron-sulfur cl | 581760   | 970910   | 1286100  | 838680   | 626030   |
| Q99KJ8 | Dynactin sub   | 6945.4   | 20130    | 10715    | 14768    | 7940.9   |
| Q9CY50 | Translocon-a   | 12252    | 20958    | 16981    | 2740.6   | 30326    |
| O88967 | ATP-depende    | 1561200  | 1272600  | 1948700  | 1336300  | 1174700  |
| Q99N94 | 39S ribosoma   | 45356    | 279350   | 85489    | 183600   | 171950   |
| P47757 | F-actin-cappi  | 225630   | 250890   | 268290   | 488620   | 183880   |
| Q9CQX2 | Cytochrome     | 472860   | 352770   | 446930   | 436050   | 915910   |
| P47740 | Fatty aldehyc  | 249040   | 241100   | 221500   | 168840   | 306000   |
| Q8K354 | Carbonyl red   | 13515    | 12728    | 20321    | 24577    | 14709    |
| Q9CZW5 | Mitochondria   | 43414    | 41916    | 25954    | 66809    | 8123.8   |
| O08539 | Myc box-dep    | 7045.8   | 8090.5   | 2768.2   | 4616.1   | 7689.6   |
| Q8K209 | Adhesion G-p   | 36817    | 43900    | 51936    | 3041.5   | 38866    |
| Q8CHG7 | Rap guanine    | 7970.1   | 9951.4   | 95627    | 117960   | 36574    |
| Q8BWM0 | Prostaglandin  | 46478    | 117240   | 164660   | 110690   | 575060   |
| Q8C8R3 | Ankyrin-2 OS   | 4381     | 7172.7   | 2483.2   | 1928.8   | 3509.2   |
| P56213 | FAD-linked si  | 71447    | 48932    | 60394    | 70673    | 97286    |
| Q8BSF4 | Phosphatidyl   | 31243    | 24013    | 9281.6   | 15243    | 13611    |
| Q8QZS1 | 3-hydroxyiso   | 511840   | 522120   | 596160   | 329880   | 427280   |
| P00405 | Cytochrome     | 33188000 | 33212000 | 22970000 | 20504000 | 25984000 |
| P07901 | Heat shock p   | 63365    | 80187    | 98679    | 103560   | 97814    |
| Q8CC88 | von Willebra   | 129580   | 94423    | 232860   | 37083    | 40187    |
| Q3TBW2 | 39S ribosoma   | 6690.2   | 3945.3   | 41703    | 81219    | 12395    |
| O55143 | Sarcoplasmic   | 254320   | 289210   | 314560   | 303470   | 338150   |
| Q9CWZ7 | Gamma-solu     | 68900    | 17757    | 16181    | 50174    | 30026    |
| P48962 | ADP/ATP tra    | 1698600  | 1728100  | 18643000 | 20458000 | 1342300  |
| Q9JLJ5 | Elongation of  | 115260   | 372790   | 263010   | 316750   | 377110   |
| Q922F4 | Tubulin beta-  | 109730   | 209140   | 456890   | 479560   | 249960   |
| Q9JLJ8 | Serine--tRNA   | 293810   | 202950   | 177990   | 194990   | 108080   |
| P97300 | Neuroplastin   | 245070   | 163740   | 331790   | 316460   | 568020   |
| P63213 | Guanine nucl   | 130900   | 841230   | 669810   | 504590   | 360970   |
| Q99MN9 | Propionyl-Co   | 1097200  | 1163600  | 1461900  | 1242400  | 881760   |
| Q8BU31 | Ras-related p  | 18801    | 31051    | 1567.3   | 2739.6   | 444.99   |
| Q91VT4 | Carbonyl red   | 81284    | 97127    | 151970   | 186390   | 88470    |
| Q9CQH3 | NADH dehyd     | 1865500  | 1858400  | 2441100  | 58244    | 2056800  |
| Q9D2M8 | Ubiquitin-cor  | 43410    | 30191    | 24599    | 139610   | 42333    |
| P70699 | Lysosomal al   | 3713.7   | 1344.9   | 1012.6   | 2946.6   | 8049.8   |
| Q6PDL0 | Cytoplasmic    | 54511    | 40538    | 1636.4   | 136570   | 38932    |

|        |               |          |          |          |          |         |
|--------|---------------|----------|----------|----------|----------|---------|
| Q99N85 | 28S ribosoma  | 55658    | 102390   | 143780   | 159860   | 45871   |
| Q8R3K3 | Pentatricope  | 76723    | 43735    | 54814    | 25107    | 76732   |
| Q9WV85 | Nucleoside d  | 3564     | 5714.3   | 78282    | 169500   | 24131   |
| Q9CR61 | NADH dehyd    | 395970   | 467510   | 708450   | 534750   | 655690  |
| P29595 | NEDD8 OS=M    | 114290   | 155870   | 15327    | 75612    | 50045   |
| Q9D1I5 | Methylmalor   | 131260   | 196900   | 223070   | 81446    | 284860  |
| Q6PE15 | Mycophenoli   | 532860   | 527290   | 580200   | 596900   | 493570  |
| Q9QUJ7 | Long-chain-fa | 2316.3   | 1306.8   | 3074.3   | 15502    | 2817.3  |
| P62073 | Mitochondria  | 23537    | 63949    | 194900   | 49692    | 138680  |
| Q566J8 | Atypical kina | 22667    | 35120    | 139050   | 36700    | 14719   |
| Q80TR1 | Adhesion G p  | 25092    | 5815     | 8428.7   | 15610    | 19271   |
| Q9D6K5 | Synaptojanin  | 304520   | 334960   | 291100   | 252640   | 447380  |
| Q61553 | Fascin OS=M   | 46504    | 6106.4   | 454.65   | 175630   | 1086.2  |
| Q9CPR5 | 39S ribosoma  | 409730   | 71119    | 524040   | 288890   | 246740  |
| Q9CQN6 | Transmembr    | 65986    | 18963    | 127180   | 143820   | 69849   |
| Q9R0X4 | Acyl-coenzym  | 238410   | 698540   | 226400   | 147340   | 509520  |
| Q9CPW2 | Ferredoxin-2  | 82207    | 141810   | 184150   | 154060   | 139470  |
| Q80UG5 | Septin-9 OS=  | 88450    | 87967    | 71703    | 5901.5   | 34108   |
| P61982 | 14-3-3 protei | 184280   | 208500   | 206600   | 214470   | 213180  |
| Q8CGK3 | Lon protease  | 698570   | 666020   | 690860   | 577060   | 576450  |
| Q9Z247 | Peptidyl-prol | 15640    | 81046    | 35501    | 165100   | 68245   |
| P62281 | 40S ribosoma  | 1593.2   | 1847     | 9978.9   | 26337    | 15988   |
| Q922Q4 | Pyrroline-5-c | 192150   | 492170   | 161500   | 161200   | 146260  |
| O35598 | Disintegrin a | 147810   | 10748    | 121000   | 17594    | 147800  |
| P23818 | Glutamate re  | 33650    | 51306    | 48007    | 30558    | 12407   |
| Q8JZQ2 | AFG3-like pro | 300000   | 341460   | 201570   | 210100   | 357770  |
| Q3UMR5 | Calcium unip  | 134270   | 128010   | 125530   | 139820   | 122420  |
| Q8K0D5 | Elongation fa | 79815    | 56657    | 88329    | 56440    | 35062   |
| Q9DBJ1 | Phosphoglyc   | 67671    | 42929    | 119630   | 33485    | 61043   |
| Q64433 | 10 kDa heat s | 11147000 | 11642000 | 11193000 | 12981000 | 8755200 |
| Q8BK08 | Transmembr    | 213690   | 78794    | 120030   | 1288200  | 235180  |
| P12960 | Contactin-1 C | 566970   | 158440   | 162370   | 324380   | 138660  |
| Q8BX70 | Vacuolar pro  | 126990   | 135110   | 132380   | 277490   | 85780   |
| Q9CQP0 | 39S ribosoma  | 36020    | 55941    | 86626    | 89281    | 16337   |
| P58252 | Elongation fa | 172240   | 135880   | 17272    | 32326    | 50209   |
| Q8K2C6 | NAD-depend    | 118760   | 152540   | 221100   | 184380   | 163020  |
| Q9R0P9 | Ubiquitin car | 7191.6   | 115010   | 20867    | 26602    | 1940.1  |
| Q80UU9 | Membrane-a    | 65039    | 74026    | 60415    | 80386    | 43263   |
| P20029 | 78 kDa gluco  | 304230   | 120340   | 108950   | 198220   | 75886   |
| P20357 | Microtubule-  | 105760   | 99743    | 98687    | 74667    | 58424   |
| Q8BH86 | D-glutamate   | 74074    | 10794    | 12809    | 14430    | 42317   |
| Q8BLK3 | Limbic syster | 123850   | 93126    | 39220    | 25767    | 4682.8  |

|        |                |         |         |         |         |         |
|--------|----------------|---------|---------|---------|---------|---------|
| Q8VD26 | Transmembr     | 136760  | 164090  | 55058   | 65673   | 96403   |
| P62984 | Ubiquitin-60   | 972400  | 1286700 | 1199600 | 1164200 | 1042700 |
| P58044 | Isopentenyl-   | 23917   | 2314.3  | 6782.3  | 2546.5  | 9928.3  |
| Q9D924 | Iron-sulfur cl | 198550  | 229830  | 322510  | 677030  | 126700  |
| Q9JJR8 | Transmembr     | 170690  | 266460  | 303890  | 467610  | 25072   |
| P59017 | Bcl-2-like prc | 66130   | 27422   | 10449   | 37674   | 16895   |
| O88343 | Electrogenic   | 290860  | 180600  | 90716   | 86731   | 98565   |
| P56395 | Cytochrome     | 140340  | 129860  | 125880  | 164370  | 114690  |
| Q80Z24 | Neuronal grc   | 178950  | 152070  | 132360  | 100710  | 147550  |
| Q8K389 | CDK5 regulat   | 137290  | 134380  | 174030  | 192530  | 115050  |
| P16332 | Methylmalor    | 311610  | 253670  | 259090  | 344180  | 430880  |
| Q59J78 | Mimitin, mitc  | 70486   | 54115   | 15595   | 48896   | 50245   |
| P47199 | Quinone oxid   | 19976   | 12927   | 5123.1  | 7960.5  | 11611   |
| P56394 | Cytochrome     | 15951   | 11832   | 94398   | 153560  | 25697   |
| Q61595 | Kinectin OS=   | 4753.2  | 39251   | 1660    | 11124   | 28799   |
| O88935 | Synapsin-1 O   | 2249.1  | 82143   | 21466   | 60149   | 38199   |
| P70414 | Sodium/calci   | 39121   | 15920   | 201370  | 200260  | 45582   |
| Q8BRK9 | Alpha-mannn    | 99932   | 24098   | 12345   | 28884   | 74306   |
| Q9D394 | Protein RUFY   | 162350  | 118920  | 11257   | 59254   | 83448   |
| Q9QZD8 | Mitochondri    | 73252   | 73287   | 205370  | 206720  | 97811   |
| Q9D6J6 | NADH dehyd     | 1901900 | 2061600 | 1572500 | 1434500 | 2505200 |
| Q80XN0 | D-beta-hydr    | 3081500 | 5074400 | 1816500 | 1380700 | 1901300 |
| Q9DB05 | Alpha-solubl   | 22580   | 30607   | 7696    | 10384   | 27071   |
| P48771 | Cytochrome     | 6123900 | 6317200 | 3630100 | 3916000 | 6334700 |
| P52760 | 2-iminobutar   | 12717   | 108600  | 43571   | 76783   | 19197   |
| Q8K394 | Inactive phos  | 9419.5  | 6671.9  | 7564.9  | 1342.6  | 12126   |
| P47802 | Metaxin-1 O    | 93998   | 15938   | 265980  | 1042600 | 174940  |
| Q9EP89 | Serine beta-l  | 106880  | 81719   | 62865   | 89037   | 115770  |
| Q8BGT5 | Alanine amin   | 41040   | 50407   | 109610  | 70727   | 19197   |
| Q8CBE3 | WD repeat-c    | 23162   | 9951.3  | 14268   | 15260   | 13715   |
| Q9CZT8 | Ras-related p  | 29616   | 260100  | 25234   | 49368   | 70526   |
| Q921S7 | 39S ribosoma   | 64269   | 246820  | 214480  | 122900  | 108740  |
| Q9CQ62 | 2,4-dienoyl-C  | 154750  | 233800  | 386790  | 414230  | 123050  |
| Q9JKD3 | Secretory car  | 83139   | 677880  | 23135   | 34656   | 250710  |
| Q8BMS4 | Ubiquinone k   | 154180  | 210330  | 208780  | 122900  | 194500  |
| Q9DAS9 | Guanine nucl   | 14115   | 82888   | 42014   | 27592   | 41903   |
| P03911 | NADH-ubiqui    | 203490  | 200780  | 328310  | 287450  | 126730  |
| P53994 | Ras-related p  | 859310  | 955980  | 470680  | 451770  | 677070  |
| Q9CQF9 | Prenylcysteir  | 27318   | 13263   | 11795   | 13949   | 13752   |
| Q9D3P8 | Plasminogen    | 544980  | 1566600 | 207420  | 279110  | 636720  |
| P62331 | ADP-ribosyla   | 85781   | 53384   | 8160.5  | 15845   | 30393   |
| Q922R8 | Protein disul  | 59631   | 66238   | 76527   | 39415   | 161180  |

|        |                |         |         |         |         |         |
|--------|----------------|---------|---------|---------|---------|---------|
| Q8VDD5 | Myosin-9 OS    | 2309.4  | 7605.9  | 2471.1  | 4458.7  | 7373.1  |
| Q05920 | Pyruvate carl  | 1198200 | 1394500 | 1416800 | 1449200 | 1162300 |
| O35114 | Lysosome m     | 6988.9  | 3667.7  | 39698   | 7977.7  | 4945.3  |
| P34884 | Macrophage     | 123530  | 70434   | 199520  | 189360  | 3406.3  |
| P48722 | Heat shock 7   | 325310  | 82193   | 120440  | 98537   | 54027   |
| Q9CQA3 | Succinate de   | 1619900 | 1551000 | 723270  | 895370  | 550240  |
| Q9R0A0 | Peroxisomal    | 27695   | 10090   | 39391   | 16812   | 11717   |
| P35278 | Ras-related p  | 201810  | 259560  | 201480  | 110450  | 141940  |
| Q810S1 | Calcium unip   | 42881   | 15818   | 27860   | 32539   | 13738   |
| Q9JI99 | Sphingosine-   | 3170.8  | 25693   | 8056.9  | 2963    | 18488   |
| Q9WV98 | Mitochondri    | 458600  | 309650  | 467280  | 508340  | 394120  |
| P62715 | Serine/threo   | 150610  | 82800   | 12454   | 121310  | 23671   |
| Q8BKZ9 | Pyruvate def   | 544590  | 684460  | 847040  | 548120  | 755370  |
| Q9D773 | 39S ribosoma   | 97428   | 89219   | 69896   | 195320  | 51853   |
| P80560 | Receptor-ty    | 22885   | 32675   | 28390   | 5161.1  | 41706   |
| Q6NXX7 | Inactive dipe  | 56682   | 43805   | 11388   | 20204   | 59476   |
| Q9CRC9 | Glucosamine    | 5009.5  | 59913   | 13554   | 24450   | 55025   |
| P19253 | 60S ribosoma   | 190400  | 130050  | 142350  | 489430  | 40947   |
| Q99KE1 | NAD-depend     | 355590  | 367310  | 382940  | 387870  | 286780  |
| Q80Z38 | SH3 and mul    | 10841   | 27791   | 9528.2  | 2329    | 13019   |
| Q8BH95 | Enoyl-CoA hy   | 954630  | 948160  | 1395400 | 1124900 | 889870  |
| Q9DAM5 | Mitochondri    | 40593   | 57060   | 22293   | 56296   | 59301   |
| Q8VED8 | Mitochondri    | 18813   | 11223   | 5860    | 130790  | 45514   |
| Q922H2 | [Pyruvate de   | 24294   | 9017.6  | 7675    | 54148   | 16914   |
| Q5M8N4 | Epimerase fa   | 16133   | 215080  | 5667.7  | 16357   | 19683   |
| Q9CXT8 | Mitochondri    | 41478   | 100450  | 49172   | 46837   | 38886   |
| Q99JR1 | Sideroflexin-  | 2116800 | 2069100 | 2388200 | 2010300 | 2063300 |
| Q3URS9 | Coiled-coil d  | 111130  | 105170  | 30462   | 25437   | 60364   |
| Q9CRB9 | MICOS comp     | 948950  | 718440  | 1128900 | 1262500 | 1070000 |
| Q9WV54 | Acid ceramid   | 99585   | 77802   | 14579   | 11313   | 17322   |
| Q5DTL9 | Sodium-drive   | 88362   | 59671   | 20499   | 6334.9  | 44133   |
| Q61941 | NAD(P) trans   | 287520  | 164340  | 197390  | 327190  | 237630  |
| Q9CQJ8 | NADH dehyd     | 857010  | 1144600 | 734940  | 654450  | 1171500 |
| Q9JIY5 | Serine prote   | 201300  | 133600  | 199990  | 181140  | 208590  |
| Q9D7J4 | Cytochrome     | 106510  | 151410  | 144380  | 239060  | 121100  |
| Q9DC07 | LIM zinc-binc  | 28232   | 17837   | 29070   | 35271   | 29977   |
| P0DP28 | Calmodulin-ε   | 280430  | 319730  | 215400  | 159180  | 282110  |
| P62761 | Visinin-like p | 224880  | 171690  | 93552   | 78740   | 131180  |
| Q5IRJ6 | Zinc transpor  | 204900  | 164790  | 223660  | 200220  | 221390  |
| Q9CPV4 | Glyoxalase di  | 20557   | 66749   | 81058   | 21021   | 96416   |
| Q9D020 | Cytosolic 5'-r | 23306   | 24326   | 9526.4  | 16473   | 11135   |
| Q9DA03 | Complex III a  | 185400  | 178310  | 187180  | 143970  | 162380  |



|        |                |         |         |         |         |         |
|--------|----------------|---------|---------|---------|---------|---------|
| Q9JLV5 | Cullin-3 OS=M  | 658700  | 687540  | 548230  | 40118   | 610410  |
| Q9Z0X1 | Apoptosis-in   | 1047000 | 965070  | 731120  | 272340  | 612910  |
| O54901 | OX-2 membr     | 50720   | 46789   | 11449   | 54413   | 36677   |
| P18572 | Basigin OS=M   | 4172.8  | 8751.8  | 11972   | 86719   | 4313.4  |
| Q9JLV1 | BAG family n   | 58535   | 4208.6  | 18169   | 56551   | 6925.4  |
| Q9R1P0 | Proteasome     | 85185   | 3213.2  | 21232   | 18651   | 13139   |
| Q99J47 | Dehydrogena    | 143410  | 23957   | 37595   | 19756   | 81952   |
| Q811D0 | Disks large h  | 41643   | 28895   | 20494   | 261030  | 60637   |
| Q9D7B6 | Isobutyryl-Cc  | 163400  | 205800  | 382990  | 341950  | 99856   |
| Q9CQ06 | 39S ribosoma   | 11042   | 75998   | 35271   | 108400  | 9295.7  |
| Q922J9 | Fatty acyl-Co  | 967150  | 659250  | 257580  | 328630  | 258280  |
| Q9JKK7 | Tropomoduli    | 22954   | 32613   | 4922.1  | 7682.1  | 63040   |
| Q8BHF7 | CDP-diacylgl   | 223930  | 264380  | 194510  | 174320  | 168820  |
| Q60996 | Serine/threo   | 39717   | 50950   | 34004   | 20016   | 29169   |
| P00416 | Cytochrome     | 6163.3  | 2744.5  | 2597.1  | 41473   | 17462   |
| Q9CQW9 | Interferon-in  | 294130  | 209150  | 311250  | 1264900 | 16931   |
| P18242 | Cathepsin D    | 64004   | 87046   | 155230  | 193550  | 61691   |
| P63248 | cAMP-depen     | 129010  | 31747   | 67193   | 36895   | 17037   |
| P48758 | Carbonyl red   | 72971   | 233260  | 34276   | 76033   | 134930  |
| Q8C7H1 | Methylmalor    | 100260  | 248020  | 78490   | 254660  | 122690  |
| Q7TSJ2 | Microtubule-   | 15548   | 2361.1  | 15429   | 34289   | 12928   |
| Q8R2Y0 | Monoacylgl     | 88562   | 41655   | 45097   | 138990  | 127870  |
| Q9DCP2 | Sodium-cou     | 20804   | 105700  | 78416   | 73110   | 67622   |
| P56399 | Ubiquitin car  | 55057   | 79354   | 41587   | 23759   | 97865   |
| Q8CAK1 | Putative tran  | 278370  | 324200  | 269230  | 306900  | 261430  |
| Q9D273 | Cob(I)yrinic a | 201620  | 231950  | 196630  | 173730  | 203360  |
| Q8CFA2 | Aminomethy     | 80977   | 84961   | 80744   | 93168   | 13455   |
| Q80VP9 | Aspartate be   | 19742   | 1454.6  | 3007.9  | 170740  | 3022.2  |
| Q8BH55 | Threonine sy   | 273130  | 193810  | 293970  | 203840  | 189980  |
| Q8BIP0 | Aspartate--tF  | 61165   | 63082   | 65193   | 49485   | 37253   |
| Q9D6Z1 | Nucleolar pro  | 52969   | 22447   | 18886   | 25331   | 10296   |
| Q9DC70 | NADH dehyd     | 2929500 | 3423600 | 3595400 | 3111600 | 3078100 |
| Q9DCM2 | Glutathione    | 72888   | 66225   | 94953   | 76092   | 29773   |
| Q99MR3 | Solute carrier | 22753   | 21564   | 6815.2  | 11483   | 5187.9  |
| Q8BGU5 | Cyclin-Y OS=I  | 9866.7  | 9637.1  | 6330.8  | 10643   | 8165.3  |
| Q61151 | Serine/threo   | 2653.8  | 48472   | 5195.9  | 3746.3  | 2894.8  |
| Q8R3V5 | Endophilin-B   | 16221   | 4401.7  | 3296.4  | 25731   | 4411.2  |
| Q9EQH3 | Vacuolar pro   | 39681   | 18817   | 24878   | 22149   | 2599.1  |
| Q9DB41 | Mitochondria   | 509670  | 857320  | 1211900 | 2238700 | 470530  |
| P32020 | Non-specific   | 16569   | 8665.1  | 15992   | 126000  | 28799   |
| Q8VDC0 | Probable leu   | 5763.5  | 39173   | 26519   | 19991   | 19148   |
| Q9CQD1 | Ras-related p  | 53588   | 98828   | 67597   | 51661   | 91939   |

|        |                |         |         |         |         |         |
|--------|----------------|---------|---------|---------|---------|---------|
| Q9WTM5 | RuvB-like 2 C  | 515890  | 615760  | 761940  | 613460  | 652430  |
| Q9D1E8 | 1-acyl-sn-glyc | 2404.3  | 6467.9  | 1816.5  | 12412   | 1589    |
| Q9QX60 | Deoxyguanos    | 205790  | 234340  | 89830   | 52817   | 132020  |
| Q9DB25 | Dolichyl-pho   | 2210900 | 94569   | 2757100 | 114800  | 114190  |
| Q9CR51 | V-type proto   | 29291   | 30648   | 38582   | 58094   | 26398   |
| P70206 | Plexin-A1 OS   | 65492   | 44091   | 21568   | 19304   | 26604   |
| Q9CZN8 | Glutamyl-tRN   | 29854   | 36711   | 82094   | 15506   | 3263.1  |
| O88447 | Kinesin light  | 7779.6  | 70486   | 3174.2  | 41840   | 1270.6  |
| Q06185 | ATP synthase   | 5388600 | 4967400 | 5976800 | 7448700 | 5504600 |
| Q3THE2 | Myosin regul   | 43329   | 92592   | 63398   | 74372   | 71424   |
| Q8R570 | Synaptosoma    | 70669   | 44656   | 11794   | 42769   | 42127   |
| P42859 | Huntingtin O   | 8816.4  | 37526   | 33508   | 27831   | 39266   |
| Q8BP67 | 60S ribosoma   | 119100  | 137360  | 134540  | 322990  | 41809   |
| Q9CR16 | Peptidyl-prol  | 79630   | 11889   | 43322   | 25122   | 18731   |
| Q64521 | Glycerol-3-ph  | 3032000 | 3263500 | 188090  | 1413800 | 3405800 |
| P58281 | Dynamin-like   | 1072500 | 1035100 | 502050  | 620060  | 1591800 |
| Q9QXY6 | EH domain-c    | 26173   | 14543   | 5306.4  | 37198   | 42342   |
| Q8BLF1 | Neutral chole  | 81236   | 58350   | 107870  | 76196   | 82676   |
| Q8CI78 | Required for   | 154310  | 234430  | 67046   | 165360  | 245410  |
| Q9CRD2 | ER membran     | 28106   | 30435   | 48772   | 31940   | 12134   |
| Q9CWD8 | Iron-sulfur pr | 44259   | 112440  | 23944   | 61365   | 86423   |
| P51174 | Long-chain sp  | 997870  | 1611900 | 2115100 | 1825700 | 1155600 |
| Q91XV3 | Brain acid so  | 107580  | 63617   | 56464   | 78490   | 93940   |
| O70325 | Phospholipid   | 151590  | 166160  | 214550  | 294270  | 261250  |
| Q8R0S4 | Voltage-depe   | 11070   | 28212   | 5731.8  | 1611.7  | 5898.1  |
| Q8K1M6 | Dynamin-1-li   | 317320  | 243310  | 134040  | 24282   | 217560  |
| P99024 | Tubulin beta-  | 1528800 | 185840  | 341370  | 296290  | 966300  |
| Q9CYN9 | Renin recept   | 2525.7  | 42764   | 2801.8  | 13259   | 19399   |
| Q9D5T0 | ATPase famil   | 130330  | 117420  | 61486   | 98382   | 68854   |
| O88531 | Palmitoyl-pro  | 3014.9  | 19182   | 24753   | 20366   | 17997   |
| Q9R0Q6 | Actin-related  | 13136   | 16584   | 11322   | 19295   | 7209.2  |
| O88543 | COP9 signalo   | 56965   | 47544   | 17582   | 2490.6  | 34472   |
| Q60931 | Voltage-depe   | 5178000 | 4648500 | 4834100 | 4448600 | 3790900 |
| Q80V03 | Uncharacteri   | 30249   | 31156   | 29234   | 18710   | 29638   |
| Q8BGD8 | Cytochrome     | 15565   | 5472.9  | 91814   | 69500   | 22019   |
| Q8C0K5 | Graves disea   | 16941   | 13847   | 46459   | 80897   | 33038   |
| Q8CBY0 | Glutamyl-tRN   | 6902.4  | 21221   | 5721.6  | 17401   | 24408   |
| Q8R104 | NAD-depend     | 13584   | 73693   | 68140   | 83226   | 68842   |
| Q9JL56 | Glycerophos    | 17776   | 23609   | 52992   | 69222   | 13686   |
| P03930 | ATP synthase   | 2890700 | 3216400 | 3198800 | 4947500 | 3381400 |
| P99028 | Cytochrome     | 983430  | 949570  | 1813800 | 81875   | 856240  |
| Q499X9 | Methionine--   | 60107   | 38846   | 69497   | 59677   | 6476.6  |

|        |                |         |         |         |         |         |
|--------|----------------|---------|---------|---------|---------|---------|
| Q9CR57 | 60S ribosoma   | 110340  | 374960  | 45499   | 147390  | 114590  |
| P17742 | Peptidyl-prol  | 377340  | 372940  | 243520  | 184060  | 167620  |
| Q60766 | Immunity-rel   | 14120   | 9177.1  | 22050   | 7562.5  | 3561.9  |
| Q8CCJ3 | E3 UFM1-proc   | 58909   | 32505   | 11273   | 6210.6  | 11672   |
| Q01853 | Transitional e | 81221   | 51327   | 30865   | 22648   | 4267.3  |
| P80313 | T-complex pr   | 7928.6  | 5928.1  | 17230   | 18152   | 4584.1  |
| Q8BK72 | 28S ribosoma   | 120590  | 892880  | 41695   | 57860   | 304180  |
| P27601 | Guanine nucl   | 248420  | 537990  | 506740  | 592160  | 282760  |
| Q3UHD9 | Arf-GAP with   | 14136   | 27098   | 1477.8  | 9511.6  | 9719.2  |
| Q5SUC9 | Protein SCO1   | 67304   | 138340  | 108130  | 82749   | 38168   |
| Q99L43 | Phosphatida    | 27681   | 21347   | 39289   | 38325   | 47643   |
| Q8K183 | Pyridoxal kin  | 12318   | 36204   | 31145   | 35528   | 10795   |
| P57780 | Alpha-actinir  | 9948.1  | 29853   | 6372.1  | 19521   | 6712.2  |
| Q6Q477 | Plasma mem     | 22627   | 22227   | 32325   | 362980  | 30607   |
| P28738 | Kinesin heav   | 2708.8  | 39883   | 15876   | 8566.8  | 17814   |
| Q8R4N0 | Citrate lyase  | 562700  | 591870  | 477490  | 461990  | 454040  |
| P62245 | 40S ribosoma   | 22767   | 24015   | 28212   | 101040  | 40821   |
| Q99KV1 | DnaJ homolo    | 67667   | 84479   | 91235   | 10838   | 47333   |
| P70441 | Na(+)/H(+) e   | 64341   | 43082   | 24724   | 27871   | 50863   |
| Q9CWU6 | Ubiquinol-cy   | 330380  | 328440  | 217720  | 264950  | 328570  |
| P61161 | Actin-related  | 362830  | 383340  | 175090  | 167640  | 257320  |
| Q80U63 | Mitofusin-2 C  | 328260  | 281750  | 211700  | 223390  | 300740  |
| Q8VEJ9 | Vacuolar pro   | 164670  | 152180  | 39572   | 24208   | 112430  |
| Q8BRF7 | Sec1 family c  | 61868   | 29073   | 12038   | 7260.6  | 18009   |
| Q8K1R3 | Polyribonuck   | 15946   | 74312   | 12500   | 36032   | 27625   |
| P97930 | Thymidylate    | 17635   | 16490   | 106230  | 10599   | 106150  |
| Q9CQQ7 | ATP synthase   | 5682500 | 6030500 | 8555400 | 9546400 | 7441600 |
| O08807 | Peroxiredoxi   | 72745   | 156070  | 64320   | 31453   | 95522   |
| P68254 | 14-3-3 protei  | 122320  | 83451   | 63633   | 35845   | 44425   |
| Q62186 | Translocon-a   | 9269.6  | 26084   | 31805   | 15210   | 40076   |
| Q8BXZ1 | Protein disulf | 1376.2  | 2080.9  | 308.53  | 7056.9  | 963.99  |
| Q9JII6 | Alcohol dehy   | 55376   | 53534   | 44063   | 99225   | 56903   |
| Q9DCN2 | NADH-cytoch    | 136950  | 321630  | 108010  | 31322   | 159910  |
| P62717 | 60S ribosoma   | 5091.5  | 3391.9  | 8455.8  | 258960  | 8450.9  |
| P62259 | 14-3-3 protei  | 333310  | 321050  | 125590  | 124190  | 257080  |
| Q3UV70 | [Pyruvate de   | 241310  | 284590  | 163400  | 248470  | 267840  |
| Q922S4 | cGMP-depen     | 100620  | 132340  | 109760  | 76756   | 169590  |
| Q9D0F9 | Phosphogluc    | 22038   | 72135   | 30928   | 26131   | 18497   |
| Q9CPX8 | Cytochrome     | 63203   | 3301.5  | 2231.8  | 17276   | 6559.2  |
| Q9JLT4 | Thioredoxin r  | 10566   | 3015.5  | 7310.2  | 25441   | 2046    |
| P59999 | Actin-related  | 242140  | 363940  | 296790  | 283650  | 272930  |
| P98203 | Armadillo rep  | 1375.5  | 2192.8  | 420.45  | 951.16  | 4314.1  |

|        |                 |         |         |          |          |         |
|--------|-----------------|---------|---------|----------|----------|---------|
| P11983 | T-complex pr    | 63360   | 59948   | 8304.7   | 6923.3   | 39412   |
| Q9CZ83 | 39S ribosoma    | 513300  | 371020  | 303310   | 436280   | 446890  |
| B1AR13 | CDGSH iron-s    | 21823   | 22792   | 26518    | 20925    | 10628   |
| Q8C163 | Nuclease EXC    | 935300  | 938870  | 1001100  | 736820   | 1121400 |
| P62075 | Mitochondria    | 321000  | 566630  | 1109800  | 673880   | 477760  |
| Q6PB66 | Leucine-rich    | 101600  | 1912800 | 977300   | 45732    | 943710  |
| Q9QYF9 | Protein NDRG    | 85661   | 85809   | 64038    | 14104    | 73078   |
| Q9EPW0 | Type I inositol | 24567   | 19033   | 1920.4   | 160330   | 72191   |
| P70704 | Phospholipid    | 13566   | 37093   | 5233.7   | 1745.2   | 9620.2  |
| Q6RUT7 | Protein CCSM    | 35434   | 54751   | 15993    | 17384    | 36891   |
| Q91YJ2 | Sorting nexin   | 22517   | 16274   | 4482.2   | 5882.5   | 11360   |
| Q9WUR2 | Enoyl-CoA de    | 79947   | 124460  | 104780   | 34815    | 44762   |
| Q9WV60 | Glycogen syn    | 41241   | 30469   | 717.18   | 9525.2   | 13846   |
| Q8BIJ6 | Isoleucine--tl  | 1099400 | 1002200 | 906710   | 798600   | 911280  |
| Q62191 | E3 ubiquitin-   | 12952   | 24730   | 12427    | 84881    | 5786.1  |
| Q8K2B3 | Succinate de    | 337440  | 228720  | 1675500  | 872780   | 745430  |
| Q9CPU4 | Microsomal g    | 4822.7  | 16868   | 160920   | 14551    | 12474   |
| Q8BR92 | Paralemmin-     | 12780   | 26107   | 29158    | 32081    | 3379.1  |
| P23242 | Gap junction    | 33791   | 73752   | 28852    | 146530   | 84115   |
| Q6ZQI3 | Malectin OS=    | 4247.8  | 33935   | 6332.7   | 43712    | 44164   |
| Q9D1N9 | 39S ribosoma    | 247680  | 298760  | 69918    | 45619    | 170750  |
| O54734 | Dolichyl-diph   | 26020   | 77285   | 116700   | 10472    | 63202   |
| Q64727 | Vinculin OS=I   | 693.82  | 4921.6  | 1401     | 39388    | 1710.5  |
| Q60932 | Voltage-depe    | 9200300 | 7625000 | 13026000 | 12875000 | 8058400 |
| Q62108 | Disks large ho  | 53084   | 49421   | 275240   | 236370   | 106330  |
| Q921M7 | Protein FAM-    | 22232   | 11519   | 20198    | 4669.4   | 2818.7  |
| Q3TRM4 | Neuropathy t    | 134070  | 12269   | 2209.6   | 7405.4   | 34242   |
| Q3TVI8 | Pre-B-cell leu  | 26979   | 6275    | 8390.5   | 5617.8   | 4399.5  |
| P59481 | VIP36-like pr   | 73526   | 137060  | 13207    | 218520   | 114170  |
| Q99PU5 | Long-chain-fa   | 3830700 | 4051000 | 3904700  | 2866500  | 4598500 |
| Q3V3R1 | Monofunctio     | 1590700 | 1592000 | 1521100  | 1259100  | 1719800 |
| Q9CQ85 | Mitochondria    | 623600  | 666190  | 590310   | 487830   | 590920  |
| Q9CR13 | Protein FMC:    | 2561.7  | 138910  | 1832.1   | 4971.8   | 56594   |
| Q6ZWV7 | 60S ribosoma    | 45239   | 12690   | 5141.4   | 13480    | 986.56  |
| Q6R891 | Neurabin-2 C    | 14682   | 13838   | 12757    | 23804    | 4825.1  |
| O09061 | Proteasome :    | 73774   | 10726   | 5358.6   | 9733.1   | 33404   |
| P47934 | Carnitine O-a   | 236940  | 465130  | 365510   | 215270   | 218450  |
| Q8K400 | Syntaxin-binc   | 36770   | 33995   | 1180.8   | 964.7    | 11433   |
| Q99KB8 | Hydroxyacylg    | 110580  | 9646.5  | 251480   | 106350   | 99184   |
| Q9CQ60 | 6-phosphoglu    | 8207.1  | 27839   | 33149    | 39316    | 15214   |
| Q6URW6 | Myosin-14 O     | 9342    | 18699   | 20535    | 43289    | 25666   |
| Q3TC33 | Coiled-coil dc  | 45004   | 33999   | 72140    | 16195    | 25990   |

|        |                  |         |         |         |         |         |
|--------|------------------|---------|---------|---------|---------|---------|
| Q8BLQ9 | Cell adhesior    | 20113   | 2109.7  | 8650.6  | 20694   | 11191   |
| Q8K021 | Secretory car    | 246420  | 221560  | 163490  | 135590  | 171140  |
| Q9CRB6 | Tubulin polyr    | 15490   | 19329   | 36578   | 14046   | 29939   |
| Q6WVG3 | BTB/POZ dor      | 85397   | 15861   | 179660  | 86863   | 71332   |
| Q9DCS3 | Enoyl-[acyl-c    | 16077   | 6320.7  | 171990  | 131850  | 65839   |
| Q9WV84 | Nucleoside d     | 10523   | 8098.8  | 7539.5  | 63832   | 2345.9  |
| P00493 | Hypoxanthin      | 50389   | 79302   | 54199   | 49266   | 37000   |
| Q2TPA8 | Hydroxysterc     | 857.11  | 2680.7  | 1685.5  | 19048   | 4166.9  |
| Q99J85 | Neuronal per     | 65917   | 89982   | 93892   | 122070  | 97146   |
| Q9CZD3 | Glycine--tRN     | 858980  | 777880  | 674930  | 561760  | 697920  |
| P15116 | Cadherin-2 C     | 8787.6  | 50850   | 30304   | 5252    | 12780   |
| Q9WTX5 | S-phase kina:    | 7260.8  | 20854   | 46950   | 193050  | 72631   |
| P62821 | Ras-related p    | 451100  | 366240  | 178350  | 13459   | 326290  |
| O09167 | 60S ribosoma     | 21664   | 12963   | 11213   | 4600.1  | 15779   |
| P01633 | Ig kappa chai    | 228660  | 65646   | 44173   | 815670  | 233220  |
| P24288 | Branched-ch      | 541760  | 517920  | 518210  | 504200  | 449600  |
| P63276 | 40S ribosoma     | 8597.9  | 37256   | 40409   | 14357   | 3147.3  |
| P80316 | T-complex pr     | 3215.7  | 93046   | 21249   | 3627.7  | 33744   |
| Q99LP6 | GrpE protein     | 66590   | 955340  | 23288   | 552910  | 413080  |
| Q9CQ75 | NADH dehyd       | 5935800 | 5692600 | 6378900 | 6455100 | 7285300 |
| Q9D1K2 | V-type proto     | 36844   | 59707   | 45622   | 233400  | 68146   |
| Q9DCT5 | Stromal cell-    | 45704   | 4054.7  | 12920   | 85839   | 953.39  |
| Q9JLB0 | MAGUK p55        | 66206   | 17750   | 230800  | 37634   | 91961   |
| Q9Z2I0 | Mitochondria     | 2054300 | 1900600 | 1098400 | 737260  | 1945600 |
| P03995 | Glial fibrillary | 31481   | 44275   | 9994.2  | 45627   | 40867   |
| P08113 | Endoplasmic      | 14826   | 61218   | 2827.4  | 7504.4  | 43401   |
| PODJF2 | Protein PET1     | 61014   | 85740   | 3529    | 91481   | 100310  |
| P11499 | Heat shock p     | 68144   | 28495   | 6820.5  | 15826   | 1278.6  |
| P35700 | Peroxiredoxin    | 34722   | 36606   | 17724   | 8901.5  | 2853.9  |
| Q3ULF4 | Paraplegin O     | 9415.8  | 18852   | 56240   | 28893   | 13605   |
| Q91V12 | Cytosolic acy    | 145410  | 214980  | 162160  | 418600  | 142560  |
| Q925N0 | Sideroflexin-    | 1162800 | 1012800 | 1090200 | 1303300 | 807610  |
| Q9Z2Z6 | Mitochondria     | 6763.7  | 13823   | 16479   | 6186.1  | 8554.8  |
| Q791V5 | Mitochondria     | 663540  | 574260  | 642070  | 489270  | 658030  |
| Q9CZB0 | Succinate de     | 24553   | 17478   | 180560  | 96836   | 26414   |
| P63321 | Ras-related p    | 57349   | 68389   | 26225   | 47437   | 16878   |
| Q3UN90 | LYR motif-co     | 69720   | 74578   | 47319   | 31681   | 58770   |
| Q8R2Y8 | Peptidyl-tRN     | 185730  | 257320  | 10504   | 38354   | 106410  |
| Q5ND52 | rRNA methyl      | 11870   | 25050   | 6200.9  | 21685   | 3456    |
| Q9DC61 | Mitochondria     | 93234   | 67778   | 69890   | 1444.3  | 47531   |
| Q8R0N6 | Hydroxyacid-     | 23098   | 207800  | 23629   | 28290   | 39883   |
| Q5SV80 | Unconventio      | 91062   | 206310  | 258130  | 157240  | 65281   |

|        |                |          |         |          |          |          |
|--------|----------------|----------|---------|----------|----------|----------|
| Q8K3A0 | Iron-sulfur cl | 51294    | 67774   | 36452    | 55026    | 37974    |
| Q8VBT0 | Thioredoxin-   | 41335    | 28429   | 69851    | 203690   | 14500    |
| Q9D1I2 | Caspase recr   | 25048    | 41771   | 20573    | 21579    | 26636    |
| Q9QXX4 | Calcium-bind   | 33918    | 16065   | 82701    | 12512    | 17207    |
| E9PUL5 | Proline-rich t | 22220    | 14738   | 17138    | 6635.3   | 24274    |
| Q3TL44 | NLR family m   | 39102    | 51283   | 51652    | 38743    | 63702    |
| Q99104 | Unconventio    | 11830    | 133220  | 53702    | 39885    | 56506    |
| Q99N95 | 39S ribosoma   | 9804.1   | 61920   | 75802    | 56649    | 23124    |
| Q9ERT9 | Protein phos   | 27880    | 2005.5  | 7769.5   | 40174    | 10822    |
| Q9QYB5 | Gamma-addi     | 59842    | 71213   | 17444    | 15910    | 47877    |
| O08532 | Voltage-depe   | 17196    | 5450    | 26703    | 25211    | 24780    |
| P04223 | H-2 class I hi | 2855.8   | 6144.6  | 13520    | 25200    | 15319    |
| Q8VCX5 | Calcium upta   | 158980   | 174970  | 128900   | 92104    | 169410   |
| Q920E5 | Farnesyl pyr   | 39511    | 36996   | 19709    | 1184.8   | 271.64   |
| O88708 | Origin recogn  | 10822    | 33176   | 6676.9   | 14602    | 5219.1   |
| O35465 | Peptidyl-prol  | 128290   | 711950  | 202080   | 178500   | 443750   |
| P19246 | Neurofilamei   | 14101    | 11634   | 16485    | 48789    | 11604    |
| P28740 | Kinesin-like p | 143730   | 99459   | 123370   | 16815    | 69159    |
| P42125 | Enoyl-CoA de   | 719020   | 1007100 | 1079200  | 790560   | 663780   |
| P50429 | Arylsulfatase  | 18561    | 1656.1  | 5244.1   | 8018.1   | 10151    |
| Q501J2 | Protein FAM:   | 7159.3   | 143340  | 13242    | 22722    | 51812    |
| Q8BHE8 | m-AAA prote    | 286290   | 307060  | 98252    | 185370   | 186840   |
| Q8BL86 | Metallo-beta   | 25445    | 25578   | 66279    | 5092.5   | 6658     |
| Q91VU0 | Protein FAM:   | 35023    | 57326   | 46168    | 81020    | 50615    |
| Q9CQZ1 | Heat shock fa  | 82564    | 35327   | 75483    | 28391    | 51829    |
| Q9D710 | Thioredoxin-   | 62707    | 87515   | 82562    | 60256    | 57356    |
| Q9D898 | Actin-related  | 134670   | 109300  | 96063    | 135590   | 21025    |
| Q8C5H8 | NAD kinase 2   | 195690   | 197000  | 289110   | 27804    | 197360   |
| Q8VCE6 | 5'(3')-deoxyr  | 6795     | 27247   | 2911.9   | 6374.6   | 14534    |
| P20108 | Thioredoxin-   | 3954700  | 4135100 | 3965800  | 4534700  | 3496600  |
| P19783 | Cytochrome     | 10253000 | 9866200 | 10234000 | 9292100  | 10890000 |
| P40142 | Transketolas   | 151040   | 169500  | 71983    | 47175    | 92122    |
| P10637 | Microtubule-   | 376450   | 460790  | 175350   | 26465    | 410960   |
| Q8R1Q8 | Cytoplasmic    | 27982    | 22880   | 18920    | 8722.4   | 5252.7   |
| Q5FWH7 | Zinc transpor  | 20708    | 12146   | 2309.9   | 15492    | 10952    |
| Q9DCM0 | Persulfide dic | 165680   | 435990  | 282120   | 145680   | 265440   |
| Q3U1J4 | DNA damage     | 10689    | 8235.5  | 11120    | 11962    | 4939     |
| Q56A07 | Sodium chan    | 9217.1   | 3244.3  | 34422    | 20504    | 38757    |
| Q60759 | Glutaryl-CoA   | 45215    | 58244   | 30090    | 18629    | 33674    |
| Q91V61 | Sideroflexin-  | 2650900  | 2361500 | 1081800  | 1289800  | 1472200  |
| P19536 | Cytochrome     | 4230400  | 4757900 | 6504800  | 11182000 | 4670200  |
| P45952 | Medium-cha     | 192380   | 197270  | 155350   | 214640   | 102310   |

|        |               |         |         |         |         |         |
|--------|---------------|---------|---------|---------|---------|---------|
| P68372 | Tubulin beta- | 1548000 | 936120  | 463140  | 1032000 | 789950  |
| O08600 | Endonucleas   | 154680  | 284010  | 189660  | 183170  | 166570  |
| P18760 | Cofilin-1 OS= | 174010  | 190960  | 88126   | 77921   | 222220  |
| P59108 | Copine-2 OS-  | 47137   | 4496.5  | 2115.3  | 11430   | 5357.6  |
| Q61301 | Catenin alpha | 162870  | 192290  | 64429   | 102140  | 114810  |
| Q8BFR5 | Elongation fa | 4114600 | 6635900 | 3866300 | 2609800 | 4838100 |
| Q8BG32 | 26S proteasc  | 1548.2  | 13668   | 5366.8  | 1852.9  | 4825.6  |
| Q8C0C7 | Phenylalanin  | 5051.2  | 7086.8  | 3031    | 1364.4  | 847.8   |
| Q8CGY8 | UDP-N-acety   | 16388   | 2097.3  | 8389.1  | 12429   | 6182    |
| Q8K215 | LYR motif-co  | 247710  | 285530  | 271800  | 260410  | 184520  |
| Q91VM9 | Inorganic pyr | 44803   | 127130  | 84583   | 89134   | 113810  |
| Q91XC9 | Peroxisomal   | 6693.1  | 45089   | 36807   | 24043   | 17165   |
| Q921J2 | GTP-binding   | 559290  | 890070  | 459140  | 1587000 | 508590  |
| Q99M04 | Lipoyl syntha | 8420.2  | 37877   | 211910  | 8099    | 44967   |
| Q9CXJ4 | ATP-binding   | 166980  | 111190  | 260790  | 80871   | 157820  |
| Q9D8T7 | SRA stem-loc  | 22984   | 11348   | 19981   | 10343   | 12386   |
| Q9ERS2 | NADH dehyd    | 4826400 | 4819600 | 4639100 | 4675500 | 5866600 |
| Q9QUI0 | Transforming  | 6132.6  | 2212.5  | 35134   | 30573   | 13053   |
| Q9Z1P6 | NADH dehyd    | 870630  | 651610  | 399740  | 1217700 | 674870  |
| Q505D7 | Optic atroph  | 657900  | 647930  | 437000  | 500000  | 604460  |
| Q7TQ95 | Protein lunap | 13161   | 14379   | 910.76  | 23259   | 11434   |
| Q9D8S9 | BolA-like pro | 2600.4  | 87496   | 163890  | 76149   | 66964   |
| P31650 | Sodium- and   | 328020  | 226530  | 358880  | 1347000 | 178860  |
| Q91VN4 | MICOS comp    | 571620  | 559470  | 406330  | 355790  | 629750  |
| Q9Z0P4 | Paralemmin-   | 108880  | 129600  | 109150  | 63935   | 89084   |
| Q8K1N1 | Calcium-inde  | 204560  | 177480  | 149870  | 74754   | 363470  |
| Q8BHN3 | Neutral alpha | 24518   | 2127.2  | 10806   | 13300   | 8221.5  |
| Q7TPD2 | Protein FAM   | 9536.7  | 338.05  | 42857   | 60423   | 3518.2  |
| Q9D173 | Mitochondria  | 6290.4  | 26196   | 7788.6  | 3998.2  | 4433.4  |
| Q9Z1Q2 | Protein ABHL  | 68099   | 123660  | 63415   | 304430  | 155640  |
| Q8VBZ0 | Dehydrogena   | 2198.1  | 9972.6  | 6046.1  | 603.84  | 3510.9  |
| Q63912 | Oligodendro   | 3690.6  | 132250  | 174540  | 37760   | 73050   |
| Q9CY00 | Tetratricope  | 528280  | 805830  | 418020  | 1465500 | 504180  |
| P17156 | Heat shock-r  | 78781   | 60906   | 1453.1  | 65403   | 24401   |

| P42 Mouse 2 | P42 Mouse 3 | P42 Mouse 4 | P7 Avg    | P42 Avg   | Log2 P42/P7 |
|-------------|-------------|-------------|-----------|-----------|-------------|
| 58764000    | 41440000    | 43541000    | 14162250  | 52495000  | 1.89        |
| 2476700     | 3105800     | 4062000     | 541080    | 2834000   | 2.39        |
| 720750      | 1308700     | 1134900     | 22065.75  | 987872.5  | 5.48        |
| 1932400     | 2583900     | 1757000     | 404055    | 2092850   | 2.37        |
| 1357800     | 1805000     | 1795600     | 273667.5  | 1666150   | 2.61        |
| 21185       | 45112       | 45972       | 247897.5  | 33931     | -2.87       |
| 2753800     | 3807600     | 4072500     | 1267495   | 3497450   | 1.46        |
| 416550      | 613310      | 454270      | 27410.75  | 485757.5  | 4.15        |
| 1105000     | 1532500     | 1709200     | 168690    | 1403875   | 3.06        |
| 138340      | 23970       | 70743       | 545977.5  | 61774     | -3.14       |
| 1294400     | 632490      | 910620      | 133329.75 | 976977.5  | 2.87        |
| 1136800     | 1307300     | 1238600     | 139995.5  | 1195075   | 3.09        |
| 658100      | 669320      | 443050      | 67824.25  | 520790    | 2.94        |
| 1711800     | 1081500     | 1203500     | 3716250   | 1167467.5 | -1.67       |
| 1614200     | 2930600     | 2934100     | 379557.5  | 2164775   | 2.51        |
| 983200      | 1668800     | 1110800     | 192280    | 1216475   | 2.66        |
| 10458000    | 11049000    | 11768000    | 4415425   | 11320750  | 1.36        |
| 127520      | 208060      | 172030      | 15771.2   | 166235    | 3.40        |
| 879550      | 343540      | 602420      | 81070.25  | 639362.5  | 2.98        |
| 4914500     | 3397100     | 3168400     | 1553177.5 | 4223700   | 1.44        |
| 140530      | 250060      | 210310      | 18683.925 | 176587.5  | 3.24        |
| 938130      | 822390      | 696400      | 189922.75 | 858740    | 2.18        |
| 1049600     | 2333400     | 1809100     | 305130    | 1578100   | 2.37        |
| 19196000    | 29786000    | 37084000    | 13639975  | 26358750  | 0.95        |
| 111610      | 47611       | 29320       | 216107.5  | 50152.25  | -2.11       |
| 54490       | 58149       | 65465       | 256870    | 63046.75  | -2.03       |
| 2284400     | 4941200     | 3853200     | 1103835   | 3302550   | 1.58        |
| 418460      | 560460      | 449580      | 97139.25  | 497000    | 2.36        |
| 1076200     | 1398800     | 1398800     | 164821.25 | 1077880   | 2.71        |
| 272340      | 293630      | 169440      | 43116.25  | 257060    | 2.58        |
| 589410      | 1625200     | 1374500     | 132596.75 | 1019445   | 2.94        |
| 647050      | 359290      | 371230      | 49568.5   | 429340    | 3.11        |
| 198210      | 1185600     | 772730      | 60002.25  | 754422.5  | 3.65        |
| 916230      | 735170      | 772420      | 185438    | 814342.5  | 2.13        |
| 32774       | 48512       | 29194       | 138872.5  | 35872     | -1.95       |
| 1518400     | 1724600     | 1429200     | 454012.5  | 1529600   | 1.75        |
| 35646       | 555160      | 1088100     | 41049.75  | 541401.5  | 3.72        |
| 190600      | 313720      | 272550      | 49156.5   | 231927.5  | 2.24        |
| 35629       | 62480       | 126080      | 236062.5  | 70487.25  | -1.74       |
| 2841800     | 2379400     | 2952200     | 966580    | 2506775   | 1.37        |
| 59145       | 109840      | 70589       | 2565.375  | 74841.5   | 4.87        |



|          |          |          |           |           |       |
|----------|----------|----------|-----------|-----------|-------|
| 154460   | 214030   | 303610   | 1296617.5 | 322827.5  | -2.01 |
| 59799    | 27689    | 48557    | 139960    | 39611.5   | -1.82 |
| 950560   | 2586400  | 1788600  | 301492.5  | 1514492.5 | 2.33  |
| 280230   | 170770   | 1265500  | 1800332.5 | 441663    | -2.03 |
| 186530   | 215340   | 227740   | 50314     | 212390    | 2.08  |
| 2067200  | 3180700  | 2976500  | 1007649   | 2565850   | 1.35  |
| 3094100  | 2740600  | 2094200  | 977182.5  | 2421750   | 1.31  |
| 1268600  | 1214000  | 958880   | 323815    | 1067585   | 1.72  |
| 461920   | 1158000  | 582730   | 152974.5  | 728472.5  | 2.25  |
| 5138800  | 3626700  | 4057400  | 2161775   | 4349800   | 1.01  |
| 439480   | 522990   | 482840   | 127552.5  | 504137.5  | 1.98  |
| 23514    | 33753    | 98846    | 260985    | 60925.25  | -2.10 |
| 40458    | 31905    | 35683    | 183080    | 38163.5   | -2.26 |
| 343610   | 881670   | 647360   | 145715.75 | 561922.5  | 1.95  |
| 89558    | 109420   | 110650   | 13455.475 | 107879.5  | 3.00  |
| 142080   | 183020   | 142780   | 39887.75  | 173095    | 2.12  |
| 959440   | 878840   | 902820   | 2246975   | 925372.5  | -1.28 |
| 19362000 | 17296000 | 19172000 | 24477000  | 16281750  | -0.59 |
| 513140   | 685990   | 608520   | 181030    | 590780    | 1.71  |
| 40810    | 32795    | 38201    | 169745.5  | 35919     | -2.24 |
| 2328.4   | 9150.2   | 16654    | 98919.25  | 8145.7    | -3.60 |
| 112160   | 9142.6   | 80480    | 220187.5  | 74291.65  | -1.57 |
| 2047100  | 2575500  | 2610200  | 1016657.5 | 2385050   | 1.23  |
| 276040   | 37152    | 121510   | 493250    | 157643    | -1.65 |
| 582450   | 577930   | 486410   | 205197.5  | 583955    | 1.51  |
| 297140   | 315490   | 244280   | 66980.5   | 300232.5  | 2.16  |
| 2014500  | 1708400  | 2685900  | 994820    | 2258775   | 1.18  |
| 67772    | 40008    | 62560    | 285937.5  | 58038     | -2.30 |
| 1177400  | 4255700  | 2646700  | 983735    | 2573700   | 1.39  |
| 337880   | 459980   | 222800   | 80516.5   | 373680    | 2.21  |
| 424750   | 607940   | 498910   | 158355    | 496265    | 1.65  |
| 413970   | 903230   | 470030   | 177165.75 | 535875    | 1.60  |
| 2380100  | 5918000  | 5354900  | 1279992.5 | 3686600   | 1.53  |
| 6820200  | 6083800  | 6770700  | 12178750  | 6687075   | -0.86 |
| 241660   | 235650   | 271780   | 80623     | 246592.5  | 1.61  |
| 1518900  | 1197700  | 732340   | 428687.5  | 1265785   | 1.56  |
| 17407    | 179900   | 109990   | 18307.15  | 123259.25 | 2.75  |
| 178460   | 196470   | 947780   | 1356777.5 | 347421.5  | -1.97 |
| 205410   | 190570   | 150950   | 47467.8   | 183007.5  | 1.95  |
| 268560   | 835510   | 795800   | 181462.5  | 576215    | 1.67  |
| 144820   | 194890   | 213210   | 43397.5   | 200807.5  | 2.21  |
| 722570   | 1659600  | 1257400  | 527632.5  | 1531317.5 | 1.54  |

|          |          |          |           |           |       |
|----------|----------|----------|-----------|-----------|-------|
| 48881    | 22352    | 27188    | 130202.5  | 31331.5   | -2.06 |
| 482160   | 658820   | 614860   | 246210    | 553407.5  | 1.17  |
| 150320   | 183830   | 160830   | 47954     | 156075    | 1.70  |
| 1009300  | 944980   | 958580   | 379262.5  | 974840    | 1.36  |
| 66576    | 85478    | 45241    | 263337.5  | 71433     | -1.88 |
| 789590   | 1327000  | 1299000  | 330022.5  | 1014705   | 1.62  |
| 307390   | 313400   | 277720   | 79433.25  | 265217.5  | 1.74  |
| 216570   | 172020   | 170970   | 481742.5  | 180922.5  | -1.41 |
| 172950   | 10170    | 127660   | 398700    | 114747.5  | -1.80 |
| 18541    | 12017    | 17147    | 162549.75 | 19069.25  | -3.09 |
| 61592    | 6628     | 3466.8   | 939599.35 | 21783.45  | -5.43 |
| 187060   | 1016500  | 1168200  | 103883.5  | 635042.5  | 2.61  |
| 716190   | 1324600  | 450340   | 220115    | 764747.5  | 1.80  |
| 1227400  | 750700   | 740950   | 384115    | 978537.5  | 1.35  |
| 29750    | 11405    | 16877    | 118042.5  | 17014.75  | -2.79 |
| 351250   | 187910   | 232660   | 41506     | 202979.75 | 2.29  |
| 13602000 | 15776000 | 15409000 | 9666775   | 15179750  | 0.65  |
| 55004    | 48036    | 33238    | 165907.75 | 46687     | -1.83 |
| 321280   | 317210   | 335340   | 51588.35  | 248837    | 2.27  |
| 331440   | 686560   | 480390   | 147733.75 | 446045    | 1.59  |
| 192360   | 408320   | 209250   | 75089.5   | 238160    | 1.67  |
| 267160   | 116040   | 244560   | 51791.75  | 196720    | 1.93  |
| 582350   | 803650   | 557580   | 255255    | 628845    | 1.30  |
| 203430   | 183900   | 200480   | 529072.5  | 215472.5  | -1.30 |
| 148090   | 126970   | 154200   | 414377.5  | 149287.5  | -1.47 |
| 3240100  | 7059100  | 10187000 | 2451825   | 5947000   | 1.28  |
| 7001800  | 10553000 | 10290000 | 4168625   | 8538975   | 1.03  |
| 1023400  | 1422200  | 1484200  | 528307.5  | 1277200   | 1.27  |
| 32307    | 84158    | 120960   | 277997.5  | 67276     | -2.05 |
| 206910   | 387970   | 392500   | 98781     | 306060    | 1.63  |
| 44473    | 52303    | 50479    | 3665.025  | 48943.75  | 3.74  |
| 102680   | 142780   | 89424    | 232600    | 104585.5  | -1.15 |
| 143690   | 193270   | 123000   | 556932.5  | 205172.5  | -1.44 |
| 3004.7   | 22898    | 75819    | 173854.5  | 26242.625 | -2.73 |
| 165300   | 176250   | 11906    | 25468     | 142731.5  | 2.49  |
| 127630   | 134480   | 132420   | 568980    | 142922.5  | -1.99 |
| 229970   | 210770   | 197210   | 76190.25  | 206637.5  | 1.44  |
| 3124300  | 2621400  | 2628800  | 1386327.5 | 2872975   | 1.05  |
| 163020   | 501340   | 296680   | 69815.25  | 287940    | 2.04  |
| 115140   | 70090    | 108760   | 222292.5  | 96769     | -1.20 |
| 77467    | 134740   | 216430   | 445085    | 144754.25 | -1.62 |
| 128440   | 58959    | 114140   | 22946.4   | 100694.75 | 2.13  |

|         |         |         |            |           |       |
|---------|---------|---------|------------|-----------|-------|
| 136330  | 211770  | 195210  | 51427.5    | 159995.5  | 1.64  |
| 2183700 | 2046500 | 1822500 | 966395     | 1961700   | 1.02  |
| 78059   | 49661   | 61243   | 204424.675 | 58367.75  | -1.81 |
| 25174   | 19397   | 57586   | 159650.5   | 33501.25  | -2.25 |
| 38028   | 115890  | 226760  | 494445     | 106703.75 | -2.21 |
| 192280  | 1130600 | 194030  | 67202.5    | 467152.5  | 2.80  |
| 255650  | 224000  | 236290  | 597720     | 236997.5  | -1.33 |
| 103310  | 558730  | 333250  | 66014.25   | 310557.5  | 2.23  |
| 62306   | 284530  | 190010  | 20325.375  | 144316    | 2.83  |
| 246300  | 294630  | 270520  | 91928.5    | 261240    | 1.51  |
| 836510  | 588680  | 408830  | 1292750    | 556097.5  | -1.22 |
| 44624   | 119710  | 80746   | 25208      | 108912.5  | 2.11  |
| 1631.7  | 8230.3  | 507.59  | 26699.25   | 2832.04   | -3.24 |
| 109700  | 97408   | 102580  | 5526.2025  | 79060.1   | 3.84  |
| 33996   | 61715   | 39905   | 5788.225   | 45975.5   | 2.99  |
| 90605   | 91330   | 80807   | 18760.5    | 85330.5   | 2.19  |
| 44906   | 199890  | 104640  | 33460.575  | 150636.5  | 2.17  |
| 2371600 | 3278100 | 2744200 | 1397600    | 2610100   | 0.90  |
| 765640  | 945150  | 1443800 | 2061550    | 988217.5  | -1.06 |
| 47379   | 71849   | 51946   | 163874     | 53119.5   | -1.63 |
| 18882   | 68737   | 61777   | 3999.8     | 43736.75  | 3.45  |
| 13237   | 36502   | 12079   | 95195.75   | 20938.25  | -2.18 |
| 149780  | 270310  | 166490  | 60862.5    | 188457.5  | 1.63  |
| 191970  | 227870  | 259470  | 461272.5   | 215065    | -1.10 |
| 266780  | 222540  | 251950  | 667002.5   | 233050    | -1.52 |
| 91814   | 206040  | 119720  | 36298.75   | 127530    | 1.81  |
| 166100  | 123530  | 4507.8  | 20633.45   | 116386.95 | 2.50  |
| 25275   | 17993   | 221050  | 267440     | 68456.125 | -1.97 |
| 23071   | 22154   | 31541   | 72604.5    | 20512.375 | -1.82 |
| 577200  | 733430  | 702300  | 1588575    | 658185    | -1.27 |
| 549840  | 120580  | 671220  | 167514.25  | 489017.5  | 1.55  |
| 19307   | 105000  | 111430  | 271260     | 84069.25  | -1.69 |
| 116260  | 1742100 | 1352500 | 113450.5   | 815554    | 2.85  |
| 34233   | 21403   | 168040  | 254267.5   | 66373.25  | -1.94 |
| 108160  | 143860  | 95981   | 34643.75   | 115507.75 | 1.74  |
| 67302   | 62639   | 10108   | 129960     | 39347.25  | -1.72 |
| 1093200 | 1001000 | 1138700 | 501595     | 1128450   | 1.17  |
| 312970  | 574670  | 563630  | 129144     | 420665    | 1.70  |
| 56261   | 105770  | 73117   | 278570     | 71156.75  | -1.97 |
| 136650  | 241090  | 143790  | 417055     | 166700    | -1.32 |
| 380470  | 356930  | 313030  | 847907.5   | 351215    | -1.27 |
| 80395   | 142330  | 113120  | 309942.5   | 108282    | -1.52 |

|        |        |        |           |            |       |
|--------|--------|--------|-----------|------------|-------|
| 641890 | 479000 | 501700 | 1162185   | 484940     | -1.26 |
| 86006  | 18023  | 27569  | 187145    | 57047.5    | -1.71 |
| 138620 | 196320 | 125350 | 395005    | 156127.5   | -1.34 |
| 70138  | 190140 | 95852  | 26472.875 | 104596.75  | 1.98  |
| 186050 | 137550 | 215390 | 406882.5  | 175172.5   | -1.22 |
| 74095  | 29139  | 112590 | 186732.5  | 72255.25   | -1.37 |
| 129090 | 113980 | 70323  | 343015    | 101192.75  | -1.76 |
| 33035  | 35613  | 48808  | 7511.45   | 34414.5    | 2.20  |
| 101070 | 4477.3 | 103720 | 19160.2   | 126799.325 | 2.73  |
| 209780 | 686000 | 689830 | 253695    | 539282.5   | 1.09  |
| 5291   | 10722  | 24913  | 66796.75  | 11313.075  | -2.56 |
| 139360 | 279650 | 156800 | 56397.5   | 167937.75  | 1.57  |
| 266160 | 95432  | 235950 | 50436.75  | 166342.5   | 1.72  |
| 129320 | 242760 | 194390 | 65951.5   | 178827.5   | 1.44  |
| 40428  | 54756  | 38229  | 13041.125 | 53444.75   | 2.03  |
| 59303  | 52520  | 97481  | 163280    | 56948.25   | -1.52 |
| 331560 | 504200 | 349090 | 128237.25 | 391060     | 1.61  |
| 16637  | 18924  | 19435  | 72244.75  | 16738.5    | -2.11 |
| 51519  | 138620 | 55502  | 9803.5    | 66237      | 2.76  |
| 63207  | 46407  | 43850  | 165555    | 60024.5    | -1.46 |
| 52500  | 161540 | 140560 | 26188.475 | 103623.25  | 1.98  |
| 16385  | 491220 | 238230 | 15886.35  | 187979.075 | 3.56  |
| 241090 | 897210 | 442020 | 140016    | 440752.5   | 1.65  |
| 293200 | 371700 | 372540 | 112879    | 335827.5   | 1.57  |
| 26592  | 37060  | 69638  | 8030.65   | 41179.25   | 2.36  |
| 42701  | 197360 | 173980 | 21323.925 | 107153     | 2.33  |
| 123740 | 216880 | 99194  | 62994.5   | 189213.5   | 1.59  |
| 454550 | 385490 | 400080 | 206482.5  | 461370     | 1.16  |
| 238430 | 72459  | 99357  | 26028     | 113980.25  | 2.13  |
| 126550 | 278270 | 260840 | 69122.5   | 197325     | 1.51  |
| 122090 | 844900 | 280240 | 35960.3   | 329013.5   | 3.19  |
| 272720 | 215680 | 75605  | 79762.25  | 213516.25  | 1.42  |
| 88400  | 223640 | 88775  | 40231.575 | 126081.25  | 1.65  |
| 206230 | 154920 | 195650 | 418965    | 187637.5   | -1.16 |
| 520020 | 786800 | 542240 | 300575    | 649427.5   | 1.11  |
| 132140 | 101770 | 99002  | 232527.5  | 115978     | -1.00 |
| 142230 | 472600 | 324870 | 95054.75  | 275315     | 1.53  |
| 100840 | 180070 | 180170 | 38135.2   | 122962.5   | 1.69  |
| 792080 | 584090 | 623860 | 361457.5  | 845707.5   | 1.23  |
| 112460 | 274580 | 152410 | 70754     | 193652.5   | 1.45  |
| 24107  | 209930 | 259850 | 45701.25  | 346044.25  | 2.92  |
| 65826  | 62838  | 88142  | 19797.5   | 77478      | 1.97  |

|          |          |          |            |           |       |
|----------|----------|----------|------------|-----------|-------|
| 49650    | 74555    | 44184    | 12550.925  | 58141.25  | 2.21  |
| 58836    | 69783    | 221490   | 339245     | 113324.75 | -1.58 |
| 50105000 | 40857000 | 43203000 | 39250500   | 46357750  | 0.24  |
| 36648    | 114020   | 102990   | 14188.775  | 67261.25  | 2.25  |
| 151650   | 192990   | 188620   | 86707.75   | 207302.5  | 1.26  |
| 105610   | 571400   | 335810   | 64496.75   | 262270.25 | 2.02  |
| 341080   | 194040   | 370810   | 728435     | 308817.5  | -1.24 |
| 88766    | 104550   | 59721    | 23383.75   | 70380.25  | 1.59  |
| 231650   | 222400   | 243900   | 483740     | 243810    | -0.99 |
| 19315    | 71735    | 208810   | 431408.825 | 79392.5   | -2.44 |
| 8452700  | 9697400  | 9916000  | 5227325    | 9151175   | 0.81  |
| 255730   | 2219400  | 297680   | 30236.25   | 697505    | 4.53  |
| 9224100  | 5472400  | 6524900  | 11602000   | 7436175   | -0.64 |
| 154850   | 283570   | 223590   | 86740      | 207420    | 1.26  |
| 28662    | 20750    | 35208    | 76578.5    | 23064.85  | -1.73 |
| 145960   | 75754    | 90319    | 212587.5   | 107343.25 | -0.99 |
| 77452    | 68203    | 59749    | 145552.5   | 66411.75  | -1.13 |
| 1503700  | 1551900  | 1658900  | 686873     | 1511625   | 1.14  |
| 780600   | 805670   | 881540   | 319850     | 746237.5  | 1.22  |
| 720610   | 1157100  | 759060   | 271945     | 701757.5  | 1.37  |
| 236130   | 104210   | 13464    | 11906.775  | 90410.675 | 2.92  |
| 956960   | 1582800  | 1549900  | 515082.5   | 1150350   | 1.16  |
| 72413    | 487540   | 373970   | 79892      | 253382.25 | 1.67  |
| 986740   | 1370200  | 1142500  | 535845     | 1105692.5 | 1.05  |
| 82090    | 136960   | 155270   | 274157.5   | 116982.25 | -1.23 |
| 120810   | 122490   | 76437    | 314980     | 126934.25 | -1.31 |
| 71498    | 618790   | 515690   | 88632.5    | 337969.5  | 1.93  |
| 162590   | 235440   | 208470   | 82676      | 192100    | 1.22  |
| 143310   | 77678    | 113030   | 265920     | 122564.5  | -1.12 |
| 126230   | 221230   | 298790   | 106401.25  | 277047.5  | 1.38  |
| 186100   | 87709    | 125220   | 351237.5   | 148302.25 | -1.24 |
| 155550   | 182040   | 210330   | 522455     | 179695    | -1.54 |
| 118880   | 49116    | 35708    | 138931     | 60075.75  | -1.21 |
| 245090   | 592460   | 402120   | 116911     | 350512.5  | 1.58  |
| 60047    | 80060    | 180540   | 36314.75   | 106101.75 | 1.55  |
| 283750   | 402980   | 396110   | 781835     | 327332.5  | -1.26 |
| 127890   | 145170   | 114520   | 51713.75   | 125080    | 1.27  |
| 9025.5   | 62266    | 32004    | 3368.6375  | 28915.375 | 3.10  |
| 6285500  | 7271900  | 7161300  | 3799675    | 6263550   | 0.72  |
| 44134    | 12586    | 12288    | 78131.5    | 22530     | -1.79 |
| 301740   | 4150900  | 965650   | 204895     | 1387665   | 2.76  |
| 76080    | 209330   | 206580   | 47301.5    | 139043.75 | 1.56  |

|         |         |         |            |           |       |
|---------|---------|---------|------------|-----------|-------|
| 20691   | 216690  | 63945   | 12025.45   | 85431.75  | 2.83  |
| 2927500 | 2793700 | 2237900 | 1526902.5  | 2601850   | 0.77  |
| 107560  | 146040  | 130010  | 226547.5   | 128042.5  | -0.82 |
| 78757   | 48103   | 51646   | 26441.5    | 95401.5   | 1.85  |
| 176150  | 18728   | 32692   | 28756.75   | 111535    | 1.96  |
| 90140   | 60248   | 56893   | 165492.5   | 73027     | -1.18 |
| 70628   | 431690  | 345420  | 84995.75   | 234687.75 | 1.47  |
| 397060  | 39070   | 41739   | 53285      | 192849.75 | 1.86  |
| 65139   | 64879   | 38030   | 26867      | 110337    | 2.04  |
| 142380  | 116480  | 116500  | 57275.425  | 134162.5  | 1.23  |
| 16888   | 97734   | 40124   | 5717.75    | 39852.3   | 2.80  |
| 311260  | 437050  | 398920  | 877567.5   | 432382.5  | -1.02 |
| 33999   | 70444   | 183840  | 268372.5   | 104315.75 | -1.36 |
| 227210  | 298080  | 286400  | 129009.75  | 277362.5  | 1.10  |
| 17566   | 47488   | 17088   | 123586     | 35714     | -1.79 |
| 2326700 | 2881600 | 2687200 | 1760825    | 2793775   | 0.67  |
| 54309   | 346830  | 331630  | 78412.5    | 207434.25 | 1.40  |
| 286990  | 225650  | 201580  | 73325.25   | 195733.5  | 1.42  |
| 41058   | 55556   | 43645   | 13500.65   | 45909.75  | 1.77  |
| 47269   | 212320  | 267200  | 43337.1    | 142368.25 | 1.72  |
| 74313   | 203270  | 300190  | 42661.5    | 149814.75 | 1.81  |
| 144100  | 106780  | 87480   | 50802.925  | 125152.5  | 1.30  |
| 27286   | 30058   | 3319.2  | 66160.5    | 18732.3   | -1.82 |
| 77617   | 114330  | 87730   | 33787.25   | 88459.75  | 1.39  |
| 36493   | 49154   | 46473   | 12515.725  | 43459.25  | 1.80  |
| 89457   | 115080  | 74957   | 35144.25   | 94613.25  | 1.43  |
| 42903   | 90651   | 65914   | 21202.275  | 64219.5   | 1.60  |
| 88068   | 210550  | 213830  | 401265     | 158852    | -1.34 |
| 18959   | 139820  | 154550  | 205722.5   | 105497.25 | -0.96 |
| 112660  | 28762   | 9219.9  | 137851.175 | 45897.475 | -1.59 |
| 241890  | 265350  | 279380  | 108144.525 | 249827.5  | 1.21  |
| 3471300 | 3124200 | 3205000 | 2271175    | 3768325   | 0.73  |
| 8345.6  | 49815   | 34932   | 130739     | 51165.65  | -1.35 |
| 36118   | 67305   | 93412   | 159498     | 52526.25  | -1.60 |
| 1355300 | 1205200 | 1095500 | 636837.5   | 1215300   | 0.93  |
| 112460  | 68685   | 46334   | 195082.5   | 86299.75  | -1.18 |
| 8107.1  | 10471   | 27510   | 63934.775  | 12622.325 | -2.34 |
| 118020  | 173970  | 136570  | 63631      | 130809.25 | 1.04  |
| 421590  | 1508800 | 1057400 | 384527.5   | 858110    | 1.16  |
| 932170  | 624190  | 670950  | 346597.5   | 711195    | 1.04  |
| 29151   | 86695   | 50241   | 30430.25   | 133586.75 | 2.13  |
| 112400  | 14520   | 122100  | 13583.125  | 63804.25  | 2.23  |

|         |         |         |            |           |       |
|---------|---------|---------|------------|-----------|-------|
| 7180.2  | 8778.5  | 48804   | 92614.75   | 30080.925 | -1.62 |
| 401630  | 671810  | 690480  | 2056452.5  | 736730    | -1.48 |
| 229750  | 205520  | 167020  | 588482.5   | 269517.5  | -1.13 |
| 124770  | 158290  | 204580  | 56991      | 143006    | 1.33  |
| 687720  | 779620  | 761280  | 1517475    | 808305    | -0.91 |
| 249610  | 127720  | 64992   | 76309      | 173635.5  | 1.19  |
| 35281   | 36585   | 105230  | 28390.775  | 89601.5   | 1.66  |
| 56217   | 60730   | 88114   | 24520.05   | 66545     | 1.44  |
| 171420  | 735240  | 817570  | 185420     | 465185    | 1.33  |
| 66377   | 10869   | 63859   | 125538.75  | 52933.75  | -1.25 |
| 890460  | 612770  | 669670  | 343814.5   | 825925    | 1.26  |
| 6276700 | 6648600 | 5238600 | 4176100    | 6288575   | 0.59  |
| 17635   | 53462   | 659400  | 15845.1    | 191278.25 | 3.59  |
| 1420100 | 2446500 | 1888500 | 655792.5   | 1505870   | 1.20  |
| 42481   | 45197   | 19214   | 8641.6     | 30280.25  | 1.81  |
| 3441100 | 4666100 | 3296400 | 2647825    | 3881350   | 0.55  |
| 18152   | 12707   | 8793.5  | 42241.25   | 13748.875 | -1.62 |
| 14477   | 17530   | 32894   | 7728.825   | 61640.25  | 3.00  |
| 149090  | 442200  | 346060  | 507505     | 286627.5  | -0.82 |
| 33628   | 92148   | 50512   | 9679       | 44401.05  | 2.20  |
| 10540   | 52847   | 36566   | 3695.65    | 26688.9   | 2.85  |
| 231350  | 201140  | 225050  | 412145     | 221970    | -0.89 |
| 271090  | 268100  | 200390  | 186680     | 516970    | 1.47  |
| 29353   | 39643   | 16917   | 187444.5   | 23368.825 | -3.00 |
| 106100  | 155280  | 104130  | 222652.5   | 130552.5  | -0.77 |
| 138400  | 242550  | 184550  | 78386.8    | 166775    | 1.09  |
| 161330  | 11142   | 324380  | 43661.4    | 147435.5  | 1.76  |
| 51022   | 2094.9  | 7041.3  | 91404.7    | 17707.55  | -2.37 |
| 190850  | 125290  | 121150  | 366920     | 167495    | -1.13 |
| 23617   | 102380  | 110980  | 185877.5   | 92744.25  | -1.00 |
| 38280   | 236710  | 232590  | 74940.75   | 164620    | 1.14  |
| 156680  | 145030  | 72809   | 58529      | 125774.75 | 1.10  |
| 1248700 | 1978100 | 1591200 | 875142.25  | 1600725   | 0.87  |
| 107470  | 99094   | 75858   | 29475      | 84278     | 1.52  |
| 4210.4  | 8146.7  | 33624   | 44930.475  | 12087.05  | -1.89 |
| 7307.5  | 8677.5  | 20603   | 102389.775 | 27458.5   | -1.90 |
| 10823   | 22587   | 6224.5  | 54767      | 16449.625 | -1.74 |
| 1194900 | 1991300 | 1771700 | 889712.5   | 1534325   | 0.79  |
| 420770  | 255310  | 319010  | 796830     | 394047.5  | -1.02 |
| 33792   | 49517   | 38599   | 14808.15   | 40930     | 1.47  |
| 180080  | 107820  | 119440  | 233735     | 138757.5  | -0.75 |
| 18968   | 132860  | 133480  | 21301.775  | 75687.75  | 1.83  |

|         |         |         |            |            |       |
|---------|---------|---------|------------|------------|-------|
| 8658.2  | 96039   | 78782   | 21068.975  | 63139.05   | 1.58  |
| 1195.3  | 26357   | 1845.8  | 51666      | 8803.3     | -2.55 |
| 21902   | 81363   | 60091   | 16701      | 50988.25   | 1.61  |
| 172220  | 62467   | 133470  | 47634      | 116419.75  | 1.29  |
| 45101   | 24192   | 934180  | 28856.2    | 267413.5   | 3.21  |
| 37740   | 49638   | 53806   | 100966     | 39659      | -1.35 |
| 264110  | 240550  | 294610  | 128994.5   | 240945     | 0.90  |
| 42887   | 89202   | 97492   | 18717.625  | 60639.25   | 1.70  |
| 190630  | 117250  | 108210  | 65258.75   | 145287.5   | 1.15  |
| 598380  | 536210  | 384110  | 305465     | 525087.5   | 0.78  |
| 63093   | 33800   | 79329   | 25703.425  | 78213      | 1.61  |
| 164250  | 362150  | 73554   | 82341      | 196411     | 1.25  |
| 50430   | 5392.8  | 11878   | 56365      | 17353.575  | -1.70 |
| 3482.5  | 89648   | 21550   | 2743.5     | 29166.45   | 3.41  |
| 121330  | 122320  | 99549   | 48799.5    | 109428.5   | 1.17  |
| 112100  | 682200  | 692670  | 134300.5   | 375359.25  | 1.48  |
| 147710  | 202660  | 152840  | 56668.5    | 128836     | 1.18  |
| 83331   | 127880  | 168250  | 209182.5   | 116974.5   | -0.84 |
| 60546   | 422190  | 56036   | 404324.5   | 147081.75  | -1.46 |
| 182480  | 276310  | 266400  | 126122.5   | 233385     | 0.89  |
| 141290  | 149370  | 174960  | 286627.5   | 127103.5   | -1.17 |
| 144230  | 127590  | 125800  | 320477.5   | 160690     | -1.00 |
| 51937   | 50008   | 28481   | 12593.975  | 34951.025  | 1.47  |
| 1193400 | 2985900 | 2399300 | 1168150    | 1974800    | 0.76  |
| 71189   | 111780  | 80679   | 33336.6    | 85043.5    | 1.35  |
| 573210  | 1082600 | 422790  | 331622.5   | 647340     | 0.96  |
| 816.51  | 46754   | 45167   | 3532.025   | 24109.0525 | 2.77  |
| 31729   | 23736   | 30952   | 76742.5    | 32845.25   | -1.22 |
| 49748   | 67854   | 92096   | 24016.65   | 62470      | 1.38  |
| 44733   | 2822.8  | 1843.1  | 4000.15    | 21319.225  | 2.41  |
| 76841   | 100520  | 83634   | 35157.75   | 87245.25   | 1.31  |
| 16060   | 44613   | 26612   | 119335.375 | 32881.5    | -1.86 |
| 3733.4  | 13630   | 70466   | 95337.525  | 22321.125  | -2.09 |
| 14744   | 12733   | 3841.8  | 4552.2     | 33189.7    | 2.87  |
| 183420  | 108830  | 146980  | 307350     | 154900     | -0.99 |
| 42317   | 23194   | 60058   | 9717.2275  | 32488.95   | 1.74  |
| 151310  | 389520  | 193120  | 1320010.25 | 221400     | -2.58 |
| 4052.4  | 36515   | 45181   | 3620.5     | 22454.775  | 2.63  |
| 35636   | 10085   | 23809   | 157767     | 22278      | -2.82 |
| 446980  | 399800  | 397090  | 776862.5   | 437845     | -0.83 |
| 1266300 | 586110  | 590010  | 440175     | 820665     | 0.90  |
| 5779.5  | 13494   | 7702.4  | 25802.375  | 8318.1     | -1.63 |



|         |         |         |           |            |       |
|---------|---------|---------|-----------|------------|-------|
| 217340  | 265130  | 332350  | 168545    | 304830     | 0.85  |
| 19943   | 12259   | 795050  | 17279.4   | 208771.175 | 3.59  |
| 6157800 | 5258600 | 6288300 | 4081425   | 5943875    | 0.54  |
| 571810  | 914020  | 323720  | 362015    | 703337.5   | 0.96  |
| 43885   | 75167   | 11380   | 12777.525 | 38581.25   | 1.59  |
| 207960  | 96337   | 93231   | 225967.5  | 138017     | -0.71 |
| 166020  | 238930  | 179060  | 89200     | 178100     | 1.00  |
| 59883   | 19764   | 43425   | 19126.25  | 81785.5    | 2.10  |
| 119130  | 88807   | 151370  | 208336.75 | 111738.5   | -0.90 |
| 43154   | 1302100 | 47313   | 334714    | 1201891.75 | 1.84  |
| 37953   | 20890   | 23147   | 70159.25  | 28447.75   | -1.30 |
| 1162200 | 1451900 | 1453600 | 2027350   | 1328425    | -0.61 |
| 63700   | 108520  | 252120  | 227295    | 120346     | -0.92 |
| 4436    | 7209.1  | 29021   | 34917.25  | 12039.1    | -1.54 |
| 27759   | 31382   | 102120  | 111325.5  | 43676.25   | -1.35 |
| 24529   | 46765   | 28270   | 10728.6   | 29854.5    | 1.48  |
| 557790  | 215960  | 340450  | 127039.25 | 292878.75  | 1.21  |
| 58483   | 126540  | 62015   | 35765     | 85822.25   | 1.26  |
| 132300  | 90723   | 78656   | 52033.75  | 114842.25  | 1.14  |
| 45923   | 29594   | 20808   | 81506.75  | 35582.25   | -1.20 |
| 1130700 | 1834500 | 1518000 | 799447.5  | 1370505    | 0.78  |
| 37359   | 22758   | 20676   | 9000.325  | 27918.25   | 1.63  |
| 200210  | 295310  | 552330  | 149191.75 | 314290     | 1.07  |
| 127220  | 7090.4  | 22197   | 162798.5  | 72211.85   | -1.17 |
| 25667   | 27755   | 32874   | 64340.75  | 23701.575  | -1.44 |
| 9494.4  | 15065   | 152660  | 5567.985  | 44905.875  | 3.01  |
| 103310  | 96242   | 103240  | 46637     | 97512.75   | 1.06  |
| 14735   | 12069   | 13956   | 58175.975 | 20850.5    | -1.48 |
| 248220  | 314830  | 470730  | 583445    | 332430     | -0.81 |
| 4784300 | 4765600 | 5328400 | 3268575   | 4630300    | 0.50  |
| 21713   | 5042.5  | 6126.7  | 28152     | 10848.8    | -1.38 |
| 94616   | 39374   | 69905   | 153287.5  | 70688.75   | -1.12 |
| 68389   | 95030   | 80081   | 142559.75 | 75547.25   | -0.92 |
| 5250.7  | 9837.6  | 35569   | 49683.25  | 16550.075  | -1.59 |
| 36677   | 79531   | 37620   | 18558.275 | 49798.75   | 1.42  |
| 7730.9  | 10243   | 3639.5  | 35611.5   | 12046.6    | -1.56 |
| 7307.2  | 5591.7  | 48025   | 3447.37   | 16637.725  | 2.27  |
| 10373   | 27836   | 23169   | 92730     | 18932.75   | -2.29 |
| 63539   | 142590  | 74942   | 185944.75 | 87906.5    | -1.08 |
| 59069   | 80314   | 63690   | 130237.5  | 70350.5    | -0.89 |
| 28861   | 65952   | 318950  | 42627.25  | 120693     | 1.50  |
| 478260  | 271000  | 237480  | 103201.5  | 251768.5   | 1.29  |

|         |         |         |           |           |       |
|---------|---------|---------|-----------|-----------|-------|
| 262970  | 255950  | 347350  | 449985    | 270547.5  | -0.73 |
| 30573   | 26051   | 24938   | 90061.3   | 27120     | -1.73 |
| 34155   | 58268   | 17064   | 89948.25  | 36465.5   | -1.30 |
| 1407.3  | 50174   | 33731   | 5400.1    | 23121.35  | 2.10  |
| 208210  | 571490  | 416670  | 185433.75 | 367792.5  | 0.99  |
| 69674   | 50993   | 89278   | 143207.25 | 76445     | -0.91 |
| 360120  | 466620  | 451830  | 711860    | 400045    | -0.83 |
| 34613   | 1256800 | 56430   | 60941     | 354413.75 | 2.54  |
| 109560  | 16600   | 106070  | 149380    | 64346.5   | -1.22 |
| 5910.5  | 5011.6  | 14074   | 5048.275  | 20529.775 | 2.02  |
| 52605   | 57145   | 42987   | 17266.85  | 44330.75  | 1.36  |
| 293510  | 540660  | 251180  | 190100.25 | 372025    | 0.97  |
| 7526.6  | 3286.5  | 3513.4  | 12068.1   | 4008.975  | -1.59 |
| 54051   | 36311   | 47571   | 105966.25 | 43617.5   | -1.28 |
| 4478.1  | 2245.3  | 12429   | 3666.25   | 13941.1   | 1.93  |
| 17898   | 315130  | 58694   | 30046.25  | 104718.75 | 1.80  |
| 168550  | 226150  | 208050  | 84618.5   | 163437.75 | 0.95  |
| 2748.7  | 8254.5  | 3717.6  | 35146.5   | 4400.925  | -3.00 |
| 5787    | 8643.4  | 2482.8  | 3364.95   | 14011.05  | 2.06  |
| 512990  | 669410  | 391540  | 299490.25 | 535607.5  | 0.84  |
| 1081600 | 2128200 | 1824200 | 969145    | 1538850   | 0.67  |
| 41886   | 16086   | 5977.4  | 42031.75  | 17168.925 | -1.29 |
| 407010  | 1562900 | 1254300 | 501375    | 900520    | 0.84  |
| 168860  | 288210  | 254190  | 769809.75 | 205985    | -1.90 |
| 14848   | 6986    | 6100.3  | 30603.75  | 11214.075 | -1.45 |
| 50682   | 3979.2  | 23818   | 14098.625 | 40472.05  | 1.52  |
| 46108   | 39349   | 143680  | 165820    | 87254.25  | -0.93 |
| 3977100 | 5727800 | 4832500 | 3284375   | 4618100   | 0.49  |
| 10953   | 2708    | 1440.6  | 16825.325 | 4010.255  | -2.07 |
| 34773   | 3553.6  | 10072   | 10710.175 | 46082.15  | 2.11  |
| 53394   | 73190   | 109630  | 127236.25 | 64540.75  | -0.98 |
| 18052   | 148520  | 201220  | 258297.5  | 144148    | -0.84 |
| 457730  | 612400  | 952480  | 494787.5  | 824802.5  | 0.74  |
| 1654700 | 1243800 | 1295800 | 888847.5  | 1434850   | 0.69  |
| 76443   | 75131   | 68007   | 36135.25  | 71866     | 0.99  |
| 69178   | 88863   | 54066   | 164062.5  | 87889.25  | -0.90 |
| 4442.4  | 5804.5  | 19896   | 24716.875 | 8850      | -1.48 |
| 6534.2  | 7824.1  | 6603.4  | 2881.05   | 7354.45   | 1.35  |
| 65032   | 80486   | 68063   | 36065.5   | 70673.75  | 0.97  |
| 75791   | 180620  | 39786   | 39070.25  | 88857.25  | 1.19  |
| 22687   | 20910   | 27565   | 47256     | 19822.65  | -1.25 |
| 23731   | 72871   | 95129   | 15777.24  | 49074.8   | 1.64  |

|         |         |         |           |           |       |
|---------|---------|---------|-----------|-----------|-------|
| 31286   | 51192   | 53796   | 16477.4   | 38627.75  | 1.23  |
| 208630  | 160440  | 185730  | 347427.5  | 195670    | -0.83 |
| 262070  | 303990  | 223210  | 395412.5  | 225062.5  | -0.81 |
| 21916   | 31447   | 47169   | 86040.25  | 32040.25  | -1.43 |
| 79196   | 79480   | 37855   | 28327     | 61374.5   | 1.12  |
| 709640  | 709640  | 391840  | 376905    | 665942.5  | 0.82  |
| 257070  | 1266100 | 4050800 | 2782600   | 1636967.5 | -0.77 |
| 345930  | 223100  | 265950  | 451862.5  | 257842.5  | -0.81 |
| 7594.5  | 13382   | 17062   | 6007.2    | 22253.125 | 1.89  |
| 1772100 | 1763400 | 1365100 | 882052.5  | 1473000   | 0.74  |
| 12835   | 130310  | 127780  | 46197.325 | 99458.75  | 1.11  |
| 115210  | 73194   | 55310   | 177830    | 88748.5   | -1.00 |
| 101390  | 120280  | 293090  | 275375    | 153233    | -0.85 |
| 75786   | 23115   | 44738   | 101042.5  | 48577     | -1.06 |
| 4059100 | 4133800 | 3862400 | 5819025   | 4010750   | -0.54 |
| 21619   | 6846.4  | 8892.1  | 35753.25  | 13857.625 | -1.37 |
| 324860  | 380840  | 337630  | 192105    | 340332.5  | 0.83  |
| 46273   | 95019   | 90547   | 144390    | 79911.5   | -0.85 |
| 24982   | 8104.3  | 75067   | 86417     | 31963.075 | -1.43 |
| 19495   | 19158   | 49648   | 117804.9  | 40819.75  | -1.53 |
| 129460  | 124520  | 113710  | 62232     | 116822    | 0.91  |
| 389110  | 229660  | 278910  | 604697.5  | 354067.5  | -0.77 |
| 1170100 | 1616400 | 1872000 | 2099975   | 1427550   | -0.56 |
| 1354.1  | 19820   | 6342    | 3775.6    | 11783.525 | 1.64  |
| 6108.2  | 31915   | 5322.5  | 3281.425  | 12128.975 | 1.89  |
| 98848   | 269010  | 197620  | 294045    | 170322    | -0.79 |
| 4897.7  | 34840   | 5089    | 7144.625  | 20011.425 | 1.49  |
| 76199   | 166150  | 15883   | 24629.5   | 68912.75  | 1.48  |
| 37961   | 34006   | 32166   | 128416.25 | 61413.25  | -1.06 |
| 36995   | 6156.7  | 11738   | 5169.9    | 15242.65  | 1.56  |
| 197360  | 97081   | 76290   | 258035    | 145935.25 | -0.82 |
| 3094.3  | 72633   | 57462   | 84357.75  | 38867.575 | -1.12 |
| 9605.1  | 11913   | 13930   | 35792     | 12671.275 | -1.50 |
| 21876   | 64464   | 55961   | 14267.175 | 36037.225 | 1.34  |
| 153700  | 137480  | 145220  | 267690    | 163395    | -0.71 |
| 6780.6  | 4938.3  | 6457.8  | 4844.25   | 18853.675 | 1.96  |
| 47938   | 61726   | 89258   | 104441.75 | 53157     | -0.97 |
| 9605    | 6241.8  | 18132   | 15098.6   | 83524.7   | 2.47  |
| 139270  | 42887   | 221250  | 192885    | 108469.75 | -0.83 |
| 3094.7  | 3364.9  | 13465   | 19912.275 | 6322.475  | -1.66 |
| 283670  | 1867300 | 1592600 | 526995    | 997952.5  | 0.92  |
| 24252   | 12834   | 87762   | 84002.75  | 33887     | -1.31 |

|         |         |         |            |           |       |
|---------|---------|---------|------------|-----------|-------|
| 23646   | 68125   | 48528   | 18443.75   | 40744.25  | 1.14  |
| 50000   | 42332   | 36205   | 119322.75  | 56594     | -1.08 |
| 6769.4  | 9511.1  | 3764.3  | 3716.45    | 8639.2    | 1.22  |
| 392970  | 442050  | 466040  | 722847.5   | 437777.5  | -0.72 |
| 19180   | 12070   | 81513   | 108567.25  | 52775     | -1.04 |
| 81775   | 132240  | 94746   | 49676.75   | 95482     | 0.94  |
| 37214   | 220180  | 240290  | 66005.375  | 143250.75 | 1.12  |
| 14541   | 44276   | 4160.5  | 5478.825   | 17372.3   | 1.66  |
| 54695   | 42586   | 958030  | 666590.5   | 277004.5  | -1.27 |
| 1274600 | 1366600 | 1000500 | 823332.5   | 1289750   | 0.65  |
| 9723800 | 7224400 | 7032500 | 5795425    | 8561425   | 0.56  |
| 11191   | 19352   | 135370  | 14158.15   | 46382.25  | 1.71  |
| 32139   | 132110  | 28950   | 21475      | 53699.75  | 1.32  |
| 128530  | 59456   | 75962   | 190757.5   | 108222    | -0.82 |
| 76045   | 18681   | 62338   | 93228.825  | 40832.675 | -1.19 |
| 86091   | 67680   | 17857   | 155007.25  | 79739.5   | -0.96 |
| 78726   | 397320  | 219550  | 101590.5   | 196438.25 | 0.95  |
| 24813   | 46218   | 3028.3  | 44772.5    | 19905.55  | -1.17 |
| 110930  | 94855   | 64536   | 138510     | 87989.75  | -0.65 |
| 235810  | 153080  | 216250  | 324965     | 190682.5  | -0.77 |
| 33237   | 21110   | 92116   | 109348.775 | 41459.75  | -1.40 |
| 12341   | 42875   | 24875   | 9682.275   | 26390.25  | 1.45  |
| 28528   | 29037   | 35422   | 78403      | 26388.25  | -1.57 |
| 28107   | 18535   | 6001    | 7568.225   | 21599     | 1.51  |
| 8004.5  | 1154.5  | 56796   | 4121.405   | 17746.15  | 2.11  |
| 11015   | 11010   | 36340   | 39917      | 17658.5   | -1.18 |
| 58434   | 19682   | 42940   | 104054     | 47215.75  | -1.14 |
| 3777.4  | 18603   | 1977.2  | 46564.725  | 7213.9    | -2.69 |
| 161230  | 54762   | 60404   | 177142.5   | 102751.5  | -0.79 |
| 34542   | 8267.3  | 21512   | 67507.925  | 24087.825 | -1.49 |
| 5401.7  | 4888.6  | 4390.9  | 4855.95    | 18644.55  | 1.94  |
| 57223   | 64943   | 53823   | 96994.5    | 46821     | -1.05 |
| 42739   | 42379   | 43623   | 86321.75   | 42839.5   | -1.01 |
| 191250  | 172340  | 107200  | 86144      | 157250    | 0.87  |
| 63684   | 41769   | 58718   | 22069.1    | 49447.5   | 1.16  |
| 1872.8  | 2060.8  | 2229.3  | 2423.825   | 13210.725 | 2.45  |
| 60867   | 117150  | 95086   | 147040     | 84554.75  | -0.80 |
| 176820  | 259080  | 236580  | 357297.5   | 211177.5  | -0.76 |
| 9068.1  | 22677   | 18401   | 5208.15    | 13366.975 | 1.36  |
| 64657   | 96789   | 257740  | 237562.5   | 152149    | -0.64 |
| 17410   | 71764   | 48785   | 20240.25   | 45237.25  | 1.16  |
| 504120  | 345780  | 397370  | 226752.5   | 372797.5  | 0.72  |

|         |         |         |           |           |       |
|---------|---------|---------|-----------|-----------|-------|
| 403020  | 500070  | 312790  | 676072.5  | 407887.5  | -0.73 |
| 38992   | 12132   | 8358.2  | 57251.25  | 22840.05  | -1.33 |
| 71503   | 80045   | 105310  | 141082.5  | 83194.25  | -0.76 |
| 1764.7  | 6160.7  | 78263   | 4200.3    | 22611.175 | 2.43  |
| 135640  | 164450  | 163860  | 76945.75  | 127781.75 | 0.73  |
| 168210  | 185920  | 405110  | 391355    | 242272.5  | -0.69 |
| 2661600 | 2176600 | 2024600 | 1334107.5 | 2040450   | 0.61  |
| 48943   | 67776   | 4961.9  | 19280.6   | 42293.975 | 1.13  |
| 9030.8  | 24520   | 71583   | 103007    | 28834.95  | -1.84 |
| 17900   | 2261.7  | 51329   | 5620.5    | 18226.7   | 1.70  |
| 246060  | 768800  | 617650  | 289372.75 | 490545    | 0.76  |
| 6810100 | 9915500 | 7702900 | 10329600  | 7565050   | -0.45 |
| 48419   | 24094   | 17314   | 48128.5   | 142334.25 | 1.56  |
| 47415   | 143020  | 111060  | 49791.25  | 90832.5   | 0.87  |
| 10853   | 6485.3  | 2973.7  | 31741.6   | 5489.5    | -2.53 |
| 2562400 | 1796600 | 1523400 | 2851400   | 2112250   | -0.43 |
| 2107.3  | 1823    | 10934   | 5073.2    | 22633.825 | 2.16  |
| 5767.9  | 61030   | 43890   | 10342.4   | 28429.85  | 1.46  |
| 25477   | 70613   | 20887   | 15646.5   | 33586.75  | 1.10  |
| 154400  | 81737   | 210360  | 266247.5  | 151319.25 | -0.82 |
| 36728   | 43425   | 47273   | 65827     | 32819.025 | -1.00 |
| 31234   | 102.84  | 1375.4  | 36900.4   | 11246.06  | -1.71 |
| 52082   | 111340  | 114620  | 140642.5  | 86880.5   | -0.69 |
| 572670  | 745150  | 776910  | 368754    | 597230    | 0.70  |
| 7318.4  | 14456   | 86821   | 69490     | 31210.35  | -1.15 |
| 119550  | 109290  | 114090  | 174515    | 102908.25 | -0.76 |
| 64149   | 2207.7  | 99350   | 94291.5   | 43188     | -1.13 |
| 74912   | 136330  | 309480  | 567670    | 325813    | -0.80 |
| 154950  | 109200  | 98888   | 187177.25 | 108034.75 | -0.79 |
| 6478.2  | 16290   | 15499   | 32087.75  | 14852.3   | -1.11 |
| 271450  | 58581   | 94713   | 90817     | 158871    | 0.81  |
| 23770   | 355260  | 355670  | 107251    | 203287.5  | 0.92  |
| 22599   | 7597.5  | 185060  | 19210.1   | 57817.375 | 1.59  |
| 38763   | 59587   | 2817.5  | 9130.675  | 25573.975 | 1.49  |
| 834350  | 1419300 | 947530  | 657017.5  | 1030370   | 0.65  |
| 77010   | 72297   | 1190900 | 698342.5  | 348540.75 | -1.00 |
| 17582   | 32537   | 32962   | 11674.25  | 26679.5   | 1.19  |
| 327250  | 281550  | 1086200 | 770087.5  | 470627.5  | -0.71 |
| 33730   | 84497   | 245580  | 45673.475 | 100502.75 | 1.14  |
| 32083   | 19051   | 69276   | 68125.5   | 36533.5   | -0.90 |
| 7388.2  | 24945   | 66887   | 12670.525 | 29810.8   | 1.23  |
| 55796   | 57066   | 88298   | 119839    | 62966.75  | -0.93 |

|         |         |         |           |            |       |
|---------|---------|---------|-----------|------------|-------|
| 46879   | 51165   | 267540  | 181321.75 | 97964.75   | -0.89 |
| 476810  | 449730  | 693370  | 778492.5  | 522702.5   | -0.57 |
| 18456   | 23717   | 75478   | 66513     | 31634.825  | -1.07 |
| 85039   | 15163   | 23363   | 91481.5   | 47389.75   | -0.95 |
| 472590  | 432820  | 583420  | 747702.5  | 482770     | -0.63 |
| 88335   | 153910  | 157340  | 70320.75  | 120115.75  | 0.77  |
| 72807   | 41929   | 24611   | 99551.5   | 55679      | -0.84 |
| 75140   | 166010  | 468390  | 354660    | 189231.75  | -0.91 |
| 17323   | 27583   | 21066   | 9940.675  | 21344.75   | 1.10  |
| 98620   | 144780  | 107210  | 62781.25  | 107671     | 0.78  |
| 130240  | 177720  | 114240  | 77801.25  | 127029     | 0.71  |
| 8812.9  | 134910  | 27690   | 35474.075 | 77878.225  | 1.13  |
| 924610  | 669430  | 684360  | 462312.5  | 686235     | 0.57  |
| 31686   | 26986   | 157740  | 23145.125 | 56464.075  | 1.29  |
| 109140  | 152980  | 255720  | 93986.5   | 154617.5   | 0.72  |
| 180360  | 131370  | 345380  | 101129.25 | 175071.5   | 0.79  |
| 277000  | 89920   | 98758   | 231725    | 159754.5   | -0.54 |
| 2570500 | 1675000 | 1544800 | 2471225   | 1831850    | -0.43 |
| 5297.6  | 6191.7  | 7923.7  | 18990.95  | 6089.35    | -1.64 |
| 156080  | 196380  | 153760  | 110085    | 175375     | 0.67  |
| 39719   | 59610   | 48662   | 23398     | 47409.75   | 1.02  |
| 149380  | 229280  | 296830  | 320757.5  | 206475     | -0.64 |
| 124490  | 95114   | 100180  | 154870    | 96725.5    | -0.68 |
| 111590  | 615090  | 118440  | 138109.75 | 241042.5   | 0.80  |
| 32461   | 26016   | 86310   | 22296.1   | 45869.75   | 1.04  |
| 32508   | 56371   | 56463   | 97257.25  | 54871.25   | -0.83 |
| 14376   | 14800   | 42114   | 54990.175 | 21939.5    | -1.33 |
| 3388.6  | 117690  | 57607   | 18839.8   | 45577      | 1.27  |
| 349690  | 1380500 | 651480  | 1078457.5 | 701170     | -0.62 |
| 27561   | 17514   | 21755   | 46924     | 120860     | 1.36  |
| 449870  | 431860  | 236880  | 273742.5  | 440055     | 0.68  |
| 602600  | 1131000 | 1692100 | 646392.5  | 1002445    | 0.63  |
| 143250  | 99165   | 59765   | 66950     | 109445     | 0.71  |
| 50944   | 4956.5  | 25610   | 49087.15  | 20465.1325 | -1.26 |
| 112970  | 104030  | 70890   | 163910    | 105262.5   | -0.64 |
| 526580  | 1070700 | 815260  | 1018415   | 674395     | -0.59 |
| 6359500 | 5251700 | 8370900 | 4383325   | 5899325    | 0.43  |
| 41194   | 60490   | 49364   | 23666.5   | 45287.5    | 0.94  |
| 9784.8  | 6596.9  | 7650.7  | 17571.25  | 8345.875   | -1.07 |
| 329230  | 264660  | 257870  | 426360    | 295380     | -0.53 |
| 4243.1  | 3968.6  | 40058   | 4189.75   | 12186.8125 | 1.54  |
| 41790   | 81359   | 99062   | 43347.25  | 75221.25   | 0.80  |

|         |         |         |            |            |       |
|---------|---------|---------|------------|------------|-------|
| 29733   | 32762   | 133480  | 26827.25   | 52397.5    | 0.97  |
| 3222.2  | 16517   | 14440   | 4791.425   | 9972.925   | 1.06  |
| 153380  | 277050  | 286820  | 370140     | 227795     | -0.70 |
| 4443.6  | 58876   | 39913   | 12968.65   | 28617.65   | 1.14  |
| 103600  | 57315   | 46197   | 121197.5   | 72431.5    | -0.74 |
| 276970  | 154080  | 156060  | 321042.5   | 211737.5   | -0.60 |
| 52750   | 28427   | 64722   | 77064.25   | 46353.5    | -0.73 |
| 59565   | 84950   | 6188    | 102904.25  | 58593.25   | -0.81 |
| 22953   | 2497.4  | 45572   | 42889.4    | 19279.85   | -1.15 |
| 191560  | 157690  | 216830  | 276473.25  | 150941     | -0.87 |
| 264660  | 336570  | 324060  | 438950     | 308625     | -0.51 |
| 18059   | 59514   | 9904    | 70291.5    | 39639.75   | -0.83 |
| 115770  | 40712   | 250470  | 57197      | 107764.75  | 0.91  |
| 152090  | 135540  | 90840   | 83731.5    | 130325     | 0.64  |
| 59242   | 86761   | 89530   | 43434.575  | 72528      | 0.74  |
| 53721   | 45189   | 22210   | 21502.25   | 37895      | 0.82  |
| 15838   | 208170  | 82458   | 36148      | 80538.75   | 1.16  |
| 23485   | 63086   | 4877700 | 2446635.25 | 1248557.5  | -0.97 |
| 10563   | 18871   | 11237   | 28525.4    | 14870.75   | -0.94 |
| 158340  | 280820  | 175910  | 130440     | 192367.5   | 0.56  |
| 6612.9  | 35607   | 30910   | 9852.05    | 21592.975  | 1.13  |
| 175030  | 135520  | 516300  | 145047.25  | 231589.25  | 0.68  |
| 52342   | 16316   | 7646.8  | 42909      | 22212.45   | -0.95 |
| 136600  | 283910  | 64963   | 209715     | 141825     | -0.56 |
| 8996.4  | 71363   | 24044   | 12523.925  | 28140.725  | 1.17  |
| 912120  | 983610  | 957010  | 1400275    | 1005585    | -0.48 |
| 51455   | 35636   | 48601   | 25006.5    | 43576.75   | 0.80  |
| 1424.9  | 1508.6  | 18214   | 17401.625  | 7429.675   | -1.23 |
| 158.19  | 21114   | 24149   | 6837.845   | 14122.0475 | 1.05  |
| 46280   | 26879   | 15811   | 55226.25   | 29003      | -0.93 |
| 76961   | 129950  | 106010  | 144757.5   | 98256      | -0.56 |
| 72307   | 89164   | 206400  | 166635     | 109873     | -0.60 |
| 14150   | 124060  | 122750  | 38820.25   | 69794      | 0.85  |
| 138000  | 143760  | 133210  | 193175     | 131405     | -0.56 |
| 26612   | 243040  | 107740  | 56239      | 104260.75  | 0.89  |
| 14925   | 7122.6  | 15041   | 29967      | 13974.4    | -1.10 |
| 1152400 | 2388600 | 1551000 | 2013475    | 1474935    | -0.45 |
| 52548   | 17617   | 25873   | 54557      | 28980.5    | -0.91 |
| 1488700 | 44663   | 1013400 | 966602.5   | 643468     | -0.59 |
| 13651   | 9588.1  | 13141   | 5410.675   | 10663.425  | 0.98  |
| 624970  | 662950  | 822800  | 468640     | 640677.5   | 0.45  |
| 44316   | 20865   | 54943   | 58678      | 33176.75   | -0.82 |

|         |          |          |           |           |       |
|---------|----------|----------|-----------|-----------|-------|
| 26105   | 33518    | 10359    | 38272.525 | 17564.99  | -1.12 |
| 172240  | 236220   | 182400   | 131622.5  | 190082.5  | 0.53  |
| 88495   | 257200   | 109270   | 83599.75  | 130761.75 | 0.65  |
| 37454   | 74734    | 41027    | 20928.5   | 39537.125 | 0.92  |
| 51415   | 101160   | 60146    | 56281.75  | 97912.75  | 0.80  |
| 31754   | 59256    | 11597    | 51810.25  | 26535.65  | -0.97 |
| 3714.4  | 20753    | 34625    | 6811.675  | 14924.56  | 1.13  |
| 2618.7  | 13160    | 2922.2   | 10116.65  | 4835.8475 | -1.06 |
| 235380  | 213550   | 197530   | 232552.5  | 168101.25 | -0.47 |
| 68338   | 102680   | 72631    | 214276.5  | 104947.25 | -1.03 |
| 19821   | 17275    | 20000    | 9040.8    | 17306.25  | 0.94  |
| 346760  | 530940   | 599070   | 266445    | 407775    | 0.61  |
| 8391.6  | 26394    | 38265    | 38680.775 | 19581.275 | -0.98 |
| 179730  | 82845    | 77697    | 200402.5  | 136285.5  | -0.56 |
| 3664.7  | 12646    | 29642    | 9512.225  | 18737.675 | 0.98  |
| 45140   | 141130   | 54428    | 45019.5   | 76946     | 0.77  |
| 55257   | 59203    | 47621    | 33572.5   | 59343.75  | 0.82  |
| 8160.7  | 50473    | 7326.6   | 10429.85  | 21573.325 | 1.05  |
| 2015100 | 2108700  | 1227700  | 1491825   | 1987475   | 0.41  |
| 6030900 | 9135900  | 8556300  | 5489925   | 7459225   | 0.44  |
| 39943   | 26380    | 9537.6   | 57532.5   | 33930.4   | -0.76 |
| 122330  | 126420   | 80733    | 161962.5  | 110973.25 | -0.55 |
| 74148   | 111160   | 46412    | 37695.25  | 63951.25  | 0.76  |
| 4457    | 7737.4   | 11559    | 16070.1   | 7143.375  | -1.17 |
| 1096300 | 889280   | 970730   | 1435400   | 1044402.5 | -0.46 |
| 62660   | 64270    | 51521    | 29704.475 | 50823.75  | 0.77  |
| 37038   | 12685    | 16871    | 33746.5   | 18489.15  | -0.87 |
| 144040  | 111440   | 132160   | 170487.5  | 121291    | -0.49 |
| 20695   | 25456    | 21733    | 39322.175 | 20216     | -0.96 |
| 1296.9  | 28554    | 20238    | 6054.425  | 12940.975 | 1.10  |
| 9837.1  | 23279    | 89496    | 18754     | 34994.025 | 0.90  |
| 1013200 | 679410   | 659880   | 1154645   | 823420    | -0.49 |
| 3903600 | 10985000 | 18103000 | 6236950   | 8917550   | 0.52  |
| 6203.6  | 5538.3   | 2013.3   | 8449.85   | 21857.3   | 1.37  |
| 44443   | 69226    | 108090   | 34572.5   | 60675.5   | 0.81  |
| 21304   | 31498    | 30711    | 13778.375 | 26130     | 0.92  |
| 29898   | 49931    | 58234    | 86199.55  | 43489.75  | -0.99 |
| 23259   | 25504    | 1922.9   | 35141.45  | 19205.475 | -0.87 |
| 115800  | 342680   | 104690   | 271866.75 | 167425    | -0.70 |
| 5179.8  | 40077    | 41949    | 46251.5   | 24980.95  | -0.89 |
| 28237   | 473380   | 32591    | 599104.35 | 374054.5  | -0.68 |
| 4196100 | 3893600  | 4397600  | 3119350   | 3821650   | 0.29  |



|         |         |         |            |           |       |
|---------|---------|---------|------------|-----------|-------|
| 28545   | 3981.3  | 17555   | 34280.925  | 16953.075 | -1.02 |
| 98527   | 245500  | 227210  | 275122.5   | 187926.75 | -0.55 |
| 56278   | 4072.6  | 4471.8  | 46874.375  | 25264.6   | -0.89 |
| 22757   | 122360  | 113430  | 128222.5   | 86502.75  | -0.57 |
| 11110   | 25057   | 31189   | 9117.4     | 17499.575 | 0.94  |
| 16708   | 6327.8  | 70131   | 12833.525  | 26930.2   | 1.07  |
| 68226   | 150970  | 72659   | 58404.5    | 94524     | 0.69  |
| 34991   | 105460  | 93046   | 135188.75  | 73214.5   | -0.88 |
| 78737   | 157070  | 151010  | 95365.75   | 139131.75 | 0.54  |
| 148530  | 171010  | 155460  | 196240     | 137686    | -0.51 |
| 10328   | 17105   | 155420  | 91274.5    | 47297.425 | -0.95 |
| 132010  | 217260  | 269390  | 254690     | 190320    | -0.42 |
| 112630  | 1097.5  | 181060  | 127687.85  | 77110.125 | -0.73 |
| 160660  | 168690  | 212460  | 108136     | 155228    | 0.52  |
| 270770  | 234420  | 205710  | 387502.5   | 272932.5  | -0.51 |
| 107210  | 280700  | 189370  | 124696     | 184672.5  | 0.57  |
| 94396   | 289620  | 274450  | 131266     | 190514    | 0.54  |
| 773210  | 788270  | 1007400 | 644137.5   | 853585    | 0.41  |
| 26491   | 13912   | 16921   | 20827.6    | 39606     | 0.93  |
| 3698200 | 88084   | 2935000 | 1231390.75 | 1934196   | 0.65  |
| 36230   | 91350   | 93224   | 101899.25  | 67138.25  | -0.60 |
| 18529   | 15789   | 10802   | 36243      | 20552.75  | -0.82 |
| 36906   | 32048   | 14136   | 39691      | 21982.9   | -0.85 |
| 23777   | 43195   | 23528   | 41308      | 25049.675 | -0.72 |
| 28628   | 20098   | 19102   | 36177.25   | 21017     | -0.78 |
| 128400  | 135730  | 116700  | 92735.5    | 130620    | 0.49  |
| 49651   | 37574   | 55400   | 77150.25   | 52867.75  | -0.55 |
| 271120  | 1168300 | 257900  | 280300     | 444289.75 | 0.66  |
| 47148   | 80817   | 71430   | 39001.25   | 61192.5   | 0.65  |
| 119080  | 309930  | 285890  | 174560     | 235960    | 0.43  |
| 138220  | 145800  | 139250  | 187607.5   | 137620    | -0.45 |
| 22939   | 10861   | 25579   | 9653.8     | 16659.975 | 0.79  |
| 125540  | 98909   | 114680  | 93009.75   | 134414.75 | 0.53  |
| 178050  | 152400  | 179770  | 226490     | 174430    | -0.38 |
| 8039.6  | 52987   | 51553   | 24858      | 41757.15  | 0.75  |
| 15680   | 33470   | 22532   | 14394.125  | 26172.75  | 0.86  |
| 33429   | 104950  | 43032   | 27639      | 47627.725 | 0.79  |
| 39949   | 38437   | 282540  | 56735.75   | 99878     | 0.82  |
| 5504.5  | 17053   | 38728   | 8366.725   | 15708.65  | 0.91  |
| 24307   | 47902   | 44372   | 62431.5    | 38054.75  | -0.71 |
| 228120  | 184640  | 186110  | 283200     | 202007.5  | -0.49 |
| 109560  | 75097   | 72824   | 42652      | 67913     | 0.67  |

|         |         |         |            |           |       |
|---------|---------|---------|------------|-----------|-------|
| 469960  | 569390  | 476030  | 405777.5   | 527835    | 0.38  |
| 263610  | 88816   | 90078   | 101388.25  | 149523.5  | 0.56  |
| 3021.1  | 20733   | 9725.7  | 5257.25    | 9554.8    | 0.86  |
| 46845   | 31915   | 10909   | 13468.15   | 24532.725 | 0.87  |
| 4023600 | 2184600 | 2919100 | 2449175    | 2975725   | 0.28  |
| 3275000 | 2814000 | 3095200 | 2496850    | 3011675   | 0.27  |
| 101590  | 99744   | 103390  | 70832.5    | 101548.5  | 0.52  |
| 124110  | 81224   | 91323   | 64112      | 93508.25  | 0.54  |
| 44523   | 50673   | 96119   | 92841.5    | 55621.5   | -0.74 |
| 517260  | 412200  | 522330  | 359765     | 484737.5  | 0.43  |
| 35517   | 46610   | 45480   | 20353.75   | 33111.85  | 0.70  |
| 25010   | 37326   | 34624   | 50228      | 30926.75  | -0.70 |
| 7117500 | 6580200 | 5405000 | 5264250    | 6644000   | 0.34  |
| 17246   | 62408   | 5356.1  | 13830.175  | 25354.775 | 0.87  |
| 73691   | 201290  | 149100  | 75053      | 111580.25 | 0.57  |
| 191580  | 253280  | 143830  | 263210     | 195117.5  | -0.43 |
| 154800  | 115650  | 76225   | 89897.5    | 128078.75 | 0.51  |
| 897090  | 685170  | 565610  | 1110225    | 824367.5  | -0.43 |
| 38575   | 39763   | 34626   | 61608.25   | 40046.75  | -0.62 |
| 62582   | 47423   | 95705   | 44474.325  | 67133.5   | 0.59  |
| 41990   | 5685.5  | 41427   | 12108.35   | 22848.2   | 0.92  |
| 247710  | 222770  | 280050  | 170096.5   | 236082.5  | 0.47  |
| 4727.8  | 19466   | 22032   | 14475.7    | 25791.45  | 0.83  |
| 1377300 | 2875500 | 2069700 | 1506700    | 1934800   | 0.36  |
| 41493   | 131240  | 156330  | 62473.5    | 93436.75  | 0.58  |
| 151070  | 334890  | 330600  | 178300     | 240517.5  | 0.43  |
| 96945   | 133370  | 227810  | 98850.5    | 145648.75 | 0.56  |
| 30607   | 35078   | 230340  | 128026.275 | 78027.5   | -0.71 |
| 1383600 | 1236600 | 1389800 | 1674100    | 1287500   | -0.38 |
| 1261.2  | 9478.7  | 1724.9  | 7879.075   | 3996.6    | -0.98 |
| 62605   | 78564   | 134260  | 64987.75   | 95567.25  | 0.56  |
| 26396   | 172420  | 142510  | 147175     | 104793.75 | -0.49 |
| 66703   | 56135   | 51153   | 91066      | 60861.75  | -0.58 |
| 98428   | 106830  | 100660  | 80364.25   | 113654.5  | 0.50  |
| 9547.2  | 7506.2  | 2753.3  | 4797.85    | 7652.925  | 0.67  |
| 9803    | 47056   | 26622   | 14103.725  | 24381.25  | 0.79  |
| 119240  | 366020  | 164260  | 279887.5   | 205672.5  | -0.44 |
| 479840  | 255440  | 163700  | 205925     | 280347.5  | 0.45  |
| 15218   | 37896   | 7618.8  | 13291.7    | 23040.7   | 0.79  |
| 181830  | 78064   | 158340  | 100695.25  | 145113.5  | 0.53  |
| 1060500 | 1561500 | 1616600 | 1013232.5  | 1309145   | 0.37  |
| 10148   | 89266   | 51079   | 61796.5    | 39623.225 | -0.64 |

|         |         |         |           |           |       |
|---------|---------|---------|-----------|-----------|-------|
| 527200  | 548110  | 443570  | 619470    | 477725    | -0.37 |
| 4923600 | 3385700 | 3598600 | 5407000   | 4395825   | -0.30 |
| 82221   | 99682   | 102940  | 126422    | 89052.5   | -0.51 |
| 41642   | 25205   | 29419   | 48813     | 29941.25  | -0.71 |
| 169620  | 385350  | 181320  | 151490    | 207265.75 | 0.45  |
| 129060  | 299400  | 275680  | 183016.25 | 244032.5  | 0.42  |
| 231230  | 62552   | 53084   | 136479.25 | 95734     | -0.51 |
| 104970  | 86165   | 122400  | 149350    | 109866.25 | -0.44 |
| 8442.9  | 57322   | 23941   | 17481.525 | 28883.475 | 0.72  |
| 161700  | 138540  | 178910  | 270245    | 197422.5  | -0.45 |
| 89191   | 778200  | 691960  | 287520    | 424385.25 | 0.56  |
| 5060200 | 4284300 | 6575000 | 4377525   | 5233350   | 0.26  |
| 11385   | 9935.1  | 21896   | 8952.075  | 14634.025 | 0.71  |
| 2898.8  | 3248.3  | 26517   | 15113.45  | 8526.725  | -0.83 |
| 61864   | 40976   | 41177   | 73729     | 50675.25  | -0.54 |
| 35137   | 148010  | 135640  | 131607.75 | 93536.75  | -0.49 |
| 2424.5  | 4810.2  | 9999.8  | 13606.65  | 27306.125 | 1.00  |
| 16211   | 35686   | 37988   | 16074.725 | 26835.75  | 0.74  |
| 5291400 | 3309600 | 3753900 | 4902625   | 4105825   | -0.26 |
| 52349   | 44564   | 69754   | 36753     | 54815.75  | 0.58  |
| 90041   | 167680  | 182720  | 199032.5  | 152337.75 | -0.39 |
| 19513   | 11048   | 75034   | 28885.925 | 47447.75  | 0.72  |
| 77650   | 31135   | 35591   | 34360.1   | 51790.25  | 0.59  |
| 317850  | 462290  | 246160  | 564225    | 429327.5  | -0.39 |
| 34129   | 28481   | 25292   | 37274.75  | 22622.075 | -0.72 |
| 1958    | 91773   | 55917   | 27120.875 | 45016.75  | 0.73  |
| 17171   | 20783   | 24510   | 29101.925 | 18258     | -0.67 |
| 57562   | 97863   | 82151   | 99422.5   | 71775     | -0.47 |
| 14726   | 30586   | 11227   | 32781.75  | 20429.75  | -0.68 |
| 178130  | 74428   | 88216   | 171170.5  | 123203.5  | -0.47 |
| 68682   | 71191   | 115200  | 116815.5  | 79186     | -0.56 |
| 37916   | 4805    | 26875   | 42076.75  | 27487.25  | -0.61 |
| 302930  | 204510  | 574650  | 416542.5  | 313157.5  | -0.41 |
| 47479   | 56101   | 51988   | 27524.8   | 42666     | 0.63  |
| 22456   | 69217   | 31345   | 71034.5   | 47913.25  | -0.57 |
| 4910.6  | 1926.1  | 24267   | 18304.5   | 11067.175 | -0.73 |
| 109840  | 90678   | 135670  | 150758.25 | 110622    | -0.45 |
| 74302   | 16782   | 98378   | 32078.75  | 50280.5   | 0.65  |
| 5872.1  | 44443   | 39224   | 15305.725 | 26060.025 | 0.77  |
| 120590  | 49129   | 83763   | 67236     | 92555.5   | 0.46  |
| 222190  | 206160  | 234940  | 215815    | 278247.5  | 0.37  |
| 205420  | 217430  | 234960  | 334205    | 253647.5  | -0.40 |

|          |          |          |           |            |       |
|----------|----------|----------|-----------|------------|-------|
| 138490   | 327580   | 226680   | 182562.5  | 236177.5   | 0.37  |
| 100240   | 104220   | 109130   | 79046.5   | 106597.5   | 0.43  |
| 4958     | 15323    | 5855.1   | 7417.625  | 12442.525  | 0.75  |
| 145810   | 126270   | 147730   | 194220    | 150750     | -0.37 |
| 129790   | 140610   | 41597    | 86375.25  | 121041.75  | 0.49  |
| 539620   | 798860   | 952110   | 919362.5  | 729155     | -0.33 |
| 4164.7   | 38314    | 35024    | 13139.6   | 21360.9    | 0.70  |
| 27437    | 5621.4   | 17505    | 13232.9   | 20222.35   | 0.61  |
| 1173000  | 2662000  | 2617600  | 1529700   | 1906825    | 0.32  |
| 169990   | 183650   | 263750   | 148448.75 | 197335     | 0.41  |
| 151770   | 228390   | 375820   | 308357.5  | 234965     | -0.39 |
| 370680   | 464910   | 393720   | 427152.5  | 536305     | 0.33  |
| 345160   | 226600   | 231780   | 220120    | 277385     | 0.33  |
| 18204    | 33586    | 44608    | 17785.25  | 27776.75   | 0.64  |
| 14891    | 7430.7   | 284520   | 44523.25  | 78741.375  | 0.82  |
| 14736    | 9587.1   | 3211.3   | 5630.15   | 8806       | 0.65  |
| 16233    | 9569.3   | 22196    | 33923.625 | 21716.075  | -0.64 |
| 72663    | 7066.6   | 33730    | 57877.125 | 37508.4    | -0.63 |
| 69284    | 17251    | 30806    | 109767    | 173100.25  | 0.66  |
| 5760.2   | 13009    | 2336.6   | 3991.425  | 6153.75    | 0.62  |
| 92186    | 5384.2   | 155590   | 62861.5   | 87611.55   | 0.48  |
| 29506    | 16188    | 60736    | 19945.15  | 30010.25   | 0.59  |
| 392140   | 343690   | 389380   | 490000    | 388122.5   | -0.34 |
| 27801000 | 23237000 | 24740000 | 27468500  | 25440500   | -0.11 |
| 125620   | 60915    | 188260   | 86447.75  | 118152.25  | 0.45  |
| 99779    | 120570   | 95771    | 123486.5  | 89076.75   | -0.47 |
| 15555    | 8675.9   | 45896    | 33389.375 | 20630.475  | -0.69 |
| 286820   | 149780   | 133170   | 290390    | 226980     | -0.36 |
| 31753    | 99082    | 58330    | 38253     | 54797.75   | 0.52  |
| 1713200  | 5201000  | 22649000 | 10631925  | 7726375    | -0.46 |
| 392250   | 264540   | 353670   | 266952.5  | 346892.5   | 0.38  |
| 159390   | 76321    | 471380   | 313830    | 239262.75  | -0.39 |
| 399430   | 104070   | 74748    | 217435    | 171582     | -0.34 |
| 350040   | 192760   | 267310   | 264265    | 344532.5   | 0.38  |
| 361850   | 538710   | 425620   | 536632.5  | 421787.5   | -0.35 |
| 920590   | 993190   | 1252600  | 1241275   | 1012035    | -0.29 |
| 41302    | 34393    | 11733    | 13539.725 | 21968.2475 | 0.70  |
| 111990   | 106100   | 87786    | 129192.75 | 98586.5    | -0.39 |
| 2273900  | 1473700  | 1922000  | 1555811   | 1931600    | 0.31  |
| 50515    | 57397    | 14245    | 59452.5   | 41122.5    | -0.53 |
| 2538.6   | 2112.3   | 2708     | 2254.45   | 3852.175   | 0.77  |
| 33200    | 70712    | 14904    | 58313.85  | 39437      | -0.56 |

|          |          |          |            |           |       |
|----------|----------|----------|------------|-----------|-------|
| 11983    | 195580   | 71628    | 115422     | 81265.5   | -0.51 |
| 14415    | 19940    | 29595    | 50094.75   | 35170.5   | -0.51 |
| 34134    | 60880    | 49589    | 64265.075  | 42183.5   | -0.61 |
| 595510   | 612240   | 689700   | 526670     | 638285    | 0.28  |
| 88050    | 11170    | 103000   | 90274.75   | 63066.25  | -0.52 |
| 143440   | 114020   | 270680   | 158169     | 203250    | 0.36  |
| 531350   | 365710   | 429380   | 559312.5   | 455002.5  | -0.30 |
| 1551.1   | 4728.5   | 4168.5   | 5549.85    | 3316.35   | -0.74 |
| 84244    | 117320   | 105810   | 83019.5    | 111513.5  | 0.43  |
| 28688    | 27679    | 86575    | 58384.25   | 39415.25  | -0.57 |
| 21523    | 22853    | 15575    | 13736.425  | 19805.5   | 0.53  |
| 494320   | 243320   | 325600   | 295805     | 377655    | 0.35  |
| 96736    | 118110   | 123900   | 57173.7625 | 84958.05  | 0.57  |
| 207710   | 271570   | 270340   | 323444.75  | 249090    | -0.38 |
| 128710   | 24608    | 27094    | 88987.25   | 62565.25  | -0.51 |
| 422350   | 383780   | 384650   | 327672.5   | 425075    | 0.38  |
| 162940   | 162720   | 221430   | 140556.75  | 171640    | 0.29  |
| 66999    | 103500   | 141380   | 63505.375  | 86496.75  | 0.45  |
| 226410   | 315170   | 231510   | 203462.5   | 246567.5  | 0.28  |
| 463530   | 566250   | 523280   | 658127.5   | 532377.5  | -0.31 |
| 57394    | 41557    | 49309    | 74321.75   | 54126.25  | -0.46 |
| 19200    | 17341    | 6445.4   | 9939.025   | 14743.6   | 0.57  |
| 241540   | 224680   | 185050   | 251755     | 199382.5  | -0.34 |
| 32536    | 7170.2   | 18667    | 74288      | 51543.3   | -0.53 |
| 52205    | 94643    | 63895    | 40880.25   | 55787.5   | 0.45  |
| 354390   | 238890   | 356560   | 263282.5   | 326902.5  | 0.31  |
| 130230   | 75860    | 96495    | 131907.5   | 106251.25 | -0.31 |
| 51966    | 160350   | 123320   | 70310.25   | 92674.5   | 0.40  |
| 68929    | 162180   | 63557    | 65928.75   | 88927.25  | 0.43  |
| 14265000 | 13095000 | 16306000 | 11740750   | 13105300  | 0.16  |
| 560560   | 792250   | 640660   | 425178.5   | 557162.5  | 0.39  |
| 141180   | 463390   | 220300   | 303040     | 240882.5  | -0.33 |
| 38160    | 90899    | 308720   | 167992.5   | 130889.75 | -0.36 |
| 39877    | 64966    | 76302    | 66967      | 49370.5   | -0.44 |
| 43747    | 100540   | 61578    | 89429.5    | 64018.5   | -0.48 |
| 135670   | 109910   | 142970   | 169195     | 137892.5  | -0.30 |
| 85500    | 154870   | 6488.9   | 42417.65   | 62199.75  | 0.55  |
| 49801    | 77506    | 43779    | 69966.5    | 53587.25  | -0.38 |
| 127060   | 81502    | 286200   | 182935     | 142662    | -0.36 |
| 66220    | 78347    | 94238    | 94714.25   | 74307.25  | -0.35 |
| 29257    | 7368.7   | 79324    | 28026.75   | 39566.675 | 0.50  |
| 32848    | 136120   | 32344    | 70490.75   | 51498.7   | -0.45 |

|         |         |         |           |           |       |
|---------|---------|---------|-----------|-----------|-------|
| 115570  | 73203   | 30097   | 105395.25 | 78818.25  | -0.42 |
| 975390  | 988610  | 864190  | 1155725   | 967722.5  | -0.26 |
| 10202   | 12168   | 19311   | 8890.025  | 12902.325 | 0.54  |
| 526640  | 489040  | 655690  | 356980    | 449517.5  | 0.33  |
| 333140  | 285910  | 340870  | 302162.5  | 246248    | -0.30 |
| 20695   | 5236.7  | 55871   | 35418.75  | 24674.425 | -0.52 |
| 99442   | 290090  | 332370  | 162226.75 | 205116.75 | 0.34  |
| 91866   | 131640  | 124700  | 140112.5  | 115724    | -0.28 |
| 126850  | 234120  | 169020  | 141022.5  | 169385    | 0.26  |
| 178090  | 84157   | 142600  | 159557.5  | 129974.25 | -0.30 |
| 227920  | 110040  | 185490  | 292137.5  | 238582.5  | -0.29 |
| 58221   | 90511   | 50507   | 47273     | 62371     | 0.40  |
| 14080   | 15981   | 20570   | 11496.65  | 15560.5   | 0.44  |
| 60623   | 68907   | 45958   | 68935.25  | 50296.25  | -0.45 |
| 14697   | 16947   | 19204   | 14197.05  | 19911.75  | 0.49  |
| 47111   | 27232   | 8953.7  | 41501.775 | 30373.925 | -0.45 |
| 77836   | 92883   | 122980  | 114167.75 | 84820.25  | -0.43 |
| 72534   | 26867   | 46495   | 41314.75  | 55050.5   | 0.41  |
| 70656   | 67267   | 44482   | 87945.25  | 66463.25  | -0.40 |
| 49951   | 95748   | 206000  | 139657.25 | 112377.5  | -0.31 |
| 1821000 | 2082800 | 1637800 | 1742625   | 2011700   | 0.21  |
| 1820600 | 2868800 | 3169000 | 2838275   | 2439925   | -0.22 |
| 6158.1  | 1472.6  | 15173   | 17816.75  | 12468.675 | -0.51 |
| 6610500 | 5197900 | 4545100 | 4996800   | 5672050   | 0.18  |
| 11137   | 62007   | 86545   | 60417.75  | 44721.5   | -0.43 |
| 10567   | 11162   | 961.96  | 6249.725  | 8704.24   | 0.48  |
| 150850  | 122570  | 595390  | 354629    | 260937.5  | -0.44 |
| 47238   | 55014   | 47248   | 85125.25  | 66317.5   | -0.36 |
| 18909   | 60110   | 110420  | 67946     | 52159     | -0.38 |
| 30402   | 15851   | 24706   | 15660.325 | 21168.5   | 0.43  |
| 46311   | 82337   | 66628   | 91079.5   | 66450.5   | -0.45 |
| 128360  | 137350  | 154900  | 162117.25 | 132337.5  | -0.29 |
| 166750  | 313030  | 380970  | 297392.5  | 245950    | -0.27 |
| 310720  | 106100  | 395150  | 204702.5  | 265670    | 0.38  |
| 213100  | 152930  | 266790  | 174047.5  | 206830    | 0.25  |
| 31167   | 92569   | 51014   | 41652.25  | 54163.25  | 0.38  |
| 137160  | 227250  | 376120  | 255007.5  | 216815    | -0.23 |
| 756610  | 410940  | 456670  | 684435    | 575322.5  | -0.25 |
| 3856.5  | 21539   | 9878.8  | 16581.25  | 12256.575 | -0.44 |
| 631130  | 385930  | 427980  | 649527.5  | 520440    | -0.32 |
| 71060   | 1370.6  | 17465   | 40792.625 | 30072.15  | -0.44 |
| 53859   | 51128   | 48658   | 60452.75  | 78706.25  | 0.38  |

|         |         |         |           |            |       |
|---------|---------|---------|-----------|------------|-------|
| 3518.4  | 6523.5  | 5191.6  | 4211.275  | 5651.65    | 0.42  |
| 1238200 | 2182800 | 1730500 | 1364675   | 1578450    | 0.21  |
| 11891   | 16479   | 7877.2  | 14583.075 | 10298.125  | -0.50 |
| 42177   | 26170   | 379080  | 145711    | 112708.325 | -0.37 |
| 297530  | 52580   | 90638   | 156620    | 123693.75  | -0.34 |
| 742410  | 965840  | 1774700 | 1197385   | 1008297.5  | -0.25 |
| 9888.7  | 18011   | 30181   | 23497     | 17449.425  | -0.43 |
| 135990  | 145970  | 230120  | 193325    | 163505     | -0.24 |
| 33437   | 16551   | 26004   | 29774.5   | 22432.5    | -0.41 |
| 22740   | 8656.4  | 4479    | 9970.925  | 13590.85   | 0.45  |
| 443890  | 259520  | 380040  | 435967.5  | 369392.5   | -0.24 |
| 39294   | 132320  | 94091   | 91793.5   | 72344      | -0.34 |
| 699460  | 745650  | 874550  | 656052.5  | 768757.5   | 0.23  |
| 68619   | 176980  | 59998   | 112965.75 | 89362.5    | -0.34 |
| 8649.9  | 22813   | 44123   | 22277.775 | 29322.975  | 0.40  |
| 46704   | 39542   | 24424   | 33019.75  | 42536.5    | 0.37  |
| 62126   | 12436   | 6359.8  | 25731.625 | 33986.7    | 0.40  |
| 367430  | 135370  | 240650  | 238057.5  | 196099.25  | -0.28 |
| 261680  | 392700  | 315300  | 373427.5  | 314115     | -0.25 |
| 22094   | 3361.2  | 29364   | 12622.3   | 16959.55   | 0.43  |
| 508890  | 1318600 | 1054600 | 1105772.5 | 942990     | -0.23 |
| 61840   | 43684   | 54423   | 44060.5   | 54812      | 0.32  |
| 73749   | 54300   | 44073   | 41671.5   | 54409      | 0.38  |
| 22479   | 54011   | 31649   | 23783.65  | 31263.25   | 0.39  |
| 26816   | 191200  | 103750  | 63309.425 | 85362.25   | 0.43  |
| 74398   | 81003   | 98540   | 59484.25  | 73206.75   | 0.30  |
| 1955100 | 1847300 | 1818000 | 2146100   | 1920925    | -0.16 |
| 73356   | 51436   | 30711   | 68049.75  | 53966.75   | -0.33 |
| 889340  | 639840  | 922900  | 1014697.5 | 880520     | -0.20 |
| 28478   | 82498   | 26394   | 50819.75  | 38673      | -0.39 |
| 41146   | 125770  | 15490   | 43716.725 | 56634.75   | 0.37  |
| 225310  | 373290  | 294850  | 244110    | 282770     | 0.21  |
| 1046100 | 1039900 | 628600  | 847750    | 971525     | 0.20  |
| 130080  | 173350  | 93707   | 179007.5  | 151431.75  | -0.24 |
| 149680  | 83434   | 186400  | 160340    | 135153.5   | -0.25 |
| 38203   | 35428   | 33034   | 27602.5   | 34160.5    | 0.31  |
| 157570  | 216530  | 194660  | 243685    | 212717.5   | -0.20 |
| 228530  | 238380  | 72363   | 142215.5  | 167613.25  | 0.24  |
| 187190  | 142340  | 139320  | 198392.5  | 172560     | -0.20 |
| 27526   | 62159   | 53862   | 47346.25  | 59990.75   | 0.34  |
| 18068   | 47186   | 20118   | 18407.85  | 24126.75   | 0.39  |
| 146140  | 135720  | 147690  | 173715    | 147982.5   | -0.23 |

|         |         |         |           |           |       |
|---------|---------|---------|-----------|-----------|-------|
| 733040  | 272340  | 637370  | 483647    | 563290    | 0.22  |
| 586150  | 1192800 | 1142900 | 753882.5  | 883690    | 0.23  |
| 29241   | 42797   | 21171   | 40842.75  | 32471.5   | -0.33 |
| 15044   | 35613   | 27783   | 27903.9   | 20688.35  | -0.43 |
| 53801   | 37298   | 5459.4  | 34365.9   | 25870.95  | -0.41 |
| 26401   | 98443   | 31582   | 32070.3   | 42391.25  | 0.40  |
| 92115   | 9454.9  | 98587   | 56179.5   | 70527.225 | 0.33  |
| 76526   | 76117   | 58345   | 88015.5   | 67906.25  | -0.37 |
| 206960  | 215690  | 403920  | 273535    | 231606.5  | -0.24 |
| 110150  | 81536   | 84343   | 57677.75  | 71331.175 | 0.31  |
| 986510  | 539120  | 796560  | 553152.5  | 645117.5  | 0.22  |
| 2620.2  | 12617   | 14272   | 17042.8   | 23137.3   | 0.44  |
| 190500  | 208900  | 188260  | 214285    | 189120    | -0.18 |
| 19824   | 24461   | 40475   | 36171.75  | 28482.25  | -0.34 |
| 7790.3  | 20020   | 25362   | 13244.475 | 17658.575 | 0.41  |
| 519170  | 622370  | 566660  | 519857.5  | 431282.75 | -0.27 |
| 67734   | 138700  | 149610  | 124957.5  | 104433.75 | -0.26 |
| 121770  | 51693   | 19619   | 66211.25  | 52529.75  | -0.33 |
| 107710  | 139490  | 117670  | 104135    | 124950    | 0.26  |
| 212160  | 187610  | 278090  | 170357.5  | 200137.5  | 0.23  |
| 3395.3  | 29900   | 5569.9  | 16906.775 | 12948.3   | -0.38 |
| 37016   | 25324   | 195200  | 78576     | 96352.5   | 0.29  |
| 14011   | 98448   | 45796   | 69507.5   | 56469.25  | -0.30 |
| 59162   | 54753   | 33176   | 49939.25  | 61239     | 0.29  |
| 289700  | 214650  | 255750  | 294675    | 255382.5  | -0.21 |
| 208180  | 253120  | 252850  | 200982.5  | 229377.5  | 0.19  |
| 45252   | 121160  | 102450  | 84962.5   | 70579.25  | -0.27 |
| 91827   | 37104   | 125590  | 48736.125 | 64385.8   | 0.40  |
| 205850  | 360320  | 336710  | 241187.5  | 273215    | 0.18  |
| 132740  | 76542   | 40369   | 59731.25  | 71726     | 0.26  |
| 12337   | 8221.7  | 61473   | 29908.25  | 23081.925 | -0.37 |
| 3357300 | 3522500 | 4154700 | 3265025   | 3528150   | 0.11  |
| 58198   | 133110  | 146880  | 77539.5   | 91990.25  | 0.25  |
| 10627   | 14883   | 18357   | 15653.8   | 12263.725 | -0.35 |
| 3915    | 23336   | 11099   | 9119.4    | 11628.825 | 0.35  |
| 10976   | 3479.4  | 26642   | 15017     | 10998.05  | -0.45 |
| 6391.6  | 36319   | 16657   | 12412.525 | 15944.7   | 0.36  |
| 20697   | 49388   | 58208   | 26381.25  | 32723.025 | 0.31  |
| 856230  | 1504700 | 1353900 | 1204397.5 | 1046340   | -0.20 |
| 14349   | 44670   | 42266   | 41806.525 | 32521     | -0.36 |
| 23324   | 17236   | 12365   | 22861.625 | 18018.25  | -0.34 |
| 96933   | 82604   | 57771   | 67918.5   | 82311.75  | 0.28  |



|         |         |         |            |           |       |
|---------|---------|---------|------------|-----------|-------|
| 659690  | 809140  | 715980  | 626762.5   | 709310    | 0.18  |
| 4981.7  | 20835   | 2963.6  | 5775.175   | 7592.325  | 0.39  |
| 148810  | 128000  | 94722   | 145694.25  | 125888    | -0.21 |
| 1559500 | 1295300 | 1356600 | 1294342.25 | 1081397.5 | -0.26 |
| 32161   | 37170   | 32251   | 39153.75   | 31995     | -0.29 |
| 33335   | 35307   | 27147   | 37613.75   | 30598.25  | -0.30 |
| 42016   | 24276   | 63054   | 41041.25   | 33152.275 | -0.31 |
| 23438   | 33191   | 37735   | 30819.95   | 23908.65  | -0.37 |
| 7995000 | 6476100 | 6203700 | 5945375    | 6544850   | 0.14  |
| 22242   | 91868   | 43022   | 68422.75   | 57139     | -0.26 |
| 38778   | 30200   | 30211   | 42472      | 35329     | -0.27 |
| 13311   | 27649   | 6415.2  | 26920.35   | 21660.3   | -0.31 |
| 157420  | 221770  | 191940  | 178497.5   | 153234.75 | -0.22 |
| 65316   | 3611.2  | 41368   | 39990.75   | 32256.55  | -0.31 |
| 1322200 | 2135100 | 1994000 | 1974347.5  | 2214275   | 0.17  |
| 798320  | 681430  | 596840  | 807427.5   | 917097.5  | 0.18  |
| 27957   | 17929   | 15013   | 20805.1    | 25810.25  | 0.31  |
| 90085   | 107260  | 93586   | 80913      | 93401.75  | 0.21  |
| 205370  | 138120  | 120880  | 155286.5   | 177445    | 0.19  |
| 19233   | 33110   | 50532   | 34813.25   | 28752.25  | -0.28 |
| 66251   | 79162   | 50543   | 60502      | 70594.75  | 0.22  |
| 1036800 | 1825700 | 1863600 | 1637642.5  | 1470425   | -0.16 |
| 27078   | 57905   | 84242   | 76537.75   | 65791.25  | -0.22 |
| 231700  | 226430  | 198260  | 206642.5   | 229410    | 0.15  |
| 17105   | 7411    | 7248.2  | 11656.375  | 9415.575  | -0.31 |
| 284870  | 183990  | 133450  | 179738     | 204967.5  | 0.19  |
| 520790  | 295810  | 234020  | 588075     | 504230    | -0.22 |
| 8383.2  | 21278   | 26630   | 15337.625  | 18922.55  | 0.30  |
| 42828   | 29666   | 204810  | 101904.5   | 86539.5   | -0.24 |
| 18929   | 20926   | 22354   | 16828.975  | 20051.5   | 0.25  |
| 19131   | 22082   | 24176   | 15084.25   | 18149.55  | 0.27  |
| 36830   | 43816   | 32525   | 31145.4    | 36910.75  | 0.25  |
| 4267200 | 6228900 | 6354600 | 4777300    | 5160400   | 0.11  |
| 26794   | 21422   | 14504   | 27337.25   | 23089.5   | -0.24 |
| 23390   | 9911.7  | 94637   | 45587.975  | 37489.425 | -0.28 |
| 29402   | 35316   | 33863   | 39536      | 32904.75  | -0.26 |
| 6685.4  | 3849.8  | 7017.8  | 12811.5    | 10490.25  | -0.29 |
| 75040   | 61586   | 70364   | 59660.75   | 68958     | 0.21  |
| 68313   | 35625   | 19787   | 40899.75   | 34352.75  | -0.25 |
| 3458200 | 3065200 | 3445900 | 3563350    | 3337675   | -0.09 |
| 427990  | 1607200 | 1406100 | 957168.75  | 1074382.5 | 0.17  |
| 39933   | 113640  | 106570  | 57031.75   | 66654.9   | 0.22  |

|         |         |         |           |           |       |
|---------|---------|---------|-----------|-----------|-------|
| 201060  | 135150  | 140070  | 169547.25 | 147717.5  | -0.20 |
| 264340  | 270450  | 355460  | 294465    | 264467.5  | -0.16 |
| 17170   | 15201   | 27137   | 13227.4   | 15767.475 | 0.25  |
| 21610   | 85391   | 12228   | 27224.4   | 32725.25  | 0.27  |
| 6634.9  | 85618   | 59784   | 46515.25  | 39076.05  | -0.25 |
| 12036   | 14734   | 10037   | 12309.675 | 10347.775 | -0.25 |
| 396570  | 280770  | 314600  | 278256.25 | 324030    | 0.22  |
| 500400  | 624780  | 650150  | 471327.5  | 514522.5  | 0.13  |
| 14250   | 14861   | 22893   | 13055.85  | 15430.8   | 0.24  |
| 115480  | 91796   | 103470  | 99130.75  | 87228.5   | -0.18 |
| 51787   | 22504   | 24653   | 31660.5   | 36646.75  | 0.21  |
| 51862   | 17941   | 16951   | 28798.75  | 24387.25  | -0.24 |
| 13418   | 25554   | 10088   | 16423.55  | 13943.05  | -0.24 |
| 69988   | 108960  | 157800  | 110039.75 | 91838.75  | -0.26 |
| 16701   | 24143   | 20180   | 16758.65  | 19709.5   | 0.23  |
| 657290  | 584370  | 571010  | 523512.5  | 566677.5  | 0.11  |
| 88708   | 3795.2  | 15990   | 44008.5   | 37328.55  | -0.24 |
| 50198   | 37495   | 88727   | 63554.75  | 55938.25  | -0.18 |
| 29933   | 34356   | 24529   | 40004.5   | 34920.25  | -0.20 |
| 181260  | 278640  | 248140  | 285372.5  | 259152.5  | -0.14 |
| 247830  | 300670  | 181800  | 272225    | 246905    | -0.14 |
| 408970  | 249230  | 187680  | 261275    | 286655    | 0.13  |
| 70317   | 66447   | 181010  | 95157.5   | 107551    | 0.18  |
| 59203   | 24758   | 25528   | 27559.9   | 31874.5   | 0.21  |
| 42511   | 25827   | 23609   | 34697.5   | 29893     | -0.22 |
| 9910.6  | 5948.4  | 2802.7  | 37738.5   | 31202.925 | -0.27 |
| 7730100 | 7674300 | 8955600 | 7453700   | 7950400   | 0.09  |
| 17198   | 15010   | 157210  | 81147     | 71235     | -0.19 |
| 65892   | 86903   | 75902   | 76312.25  | 68280.5   | -0.16 |
| 20538   | 23821   | 11767   | 20592.15  | 24050.5   | 0.22  |
| 2211.3  | 4244.2  | 5819.3  | 2705.6325 | 3309.6975 | 0.29  |
| 85589   | 67387   | 71050   | 63049.5   | 70232.25  | 0.16  |
| 175290  | 178030  | 148400  | 149478    | 165407.5  | 0.15  |
| 6115.4  | 10510   | 199560  | 68974.8   | 56159.075 | -0.30 |
| 284160  | 283590  | 148670  | 226035    | 243375    | 0.11  |
| 241520  | 278450  | 218780  | 234442.5  | 251647.5  | 0.10  |
| 157300  | 78074   | 61207   | 104869    | 116542.75 | 0.15  |
| 56145   | 65847   | 31304   | 37808     | 42948.25  | 0.18  |
| 8260.2  | 51714   | 5806.6  | 21503.075 | 18085     | -0.25 |
| 13344   | 16094   | 8512.7  | 11583.175 | 9999.175  | -0.21 |
| 209610  | 276610  | 338240  | 296630    | 274347.5  | -0.11 |
| 490.54  | 663.25  | 1488.9  | 1234.9775 | 1739.1975 | 0.49  |

|         |         |          |            |            |       |
|---------|---------|----------|------------|------------|-------|
| 30880   | 28551   | 22703    | 34634      | 30386.5    | -0.19 |
| 411620  | 429750  | 459160   | 405977.5   | 436855     | 0.11  |
| 10651   | 2829.7  | 83707    | 23014.5    | 26953.925  | 0.23  |
| 799560  | 716870  | 746850   | 903022.5   | 846170     | -0.09 |
| 318030  | 638610  | 1022200  | 667827.5   | 614150     | -0.12 |
| 738350  | 508890  | 545240   | 759358     | 684047.5   | -0.15 |
| 94598   | 16073   | 40713    | 62403      | 56115.5    | -0.15 |
| 89227   | 32237   | 42414    | 51462.6    | 59017.25   | 0.20  |
| 3112.3  | 20352   | 16679    | 14409.475  | 12440.875  | -0.21 |
| 10332   | 15125   | 46104    | 30890.5    | 27113      | -0.19 |
| 15131   | 23563   | 5488.9   | 12288.925  | 13885.725  | 0.18  |
| 57527   | 110550  | 97310    | 86000.5    | 77537.25   | -0.15 |
| 23358   | 20046   | 36684    | 20488.095  | 23483.5    | 0.20  |
| 887890  | 877970  | 909880   | 951727.5   | 896755     | -0.09 |
| 42415   | 24919   | 45315    | 33747.5    | 29608.775  | -0.19 |
| 87445   | 216590  | 2418100  | 778610     | 866891.25  | 0.15  |
| 16382   | 23026   | 177660   | 49290.425  | 57385.5    | 0.22  |
| 31898   | 23192   | 30629    | 25031.5    | 22274.525  | -0.17 |
| 67814   | 83699   | 76395    | 70731.25   | 78005.75   | 0.14  |
| 19379   | 18459   | 17581    | 22056.875  | 24895.75   | 0.17  |
| 158360  | 29939   | 248600   | 165494.25  | 151912.25  | -0.12 |
| 73252   | 79461   | 39328    | 57619.25   | 63810.75   | 0.15  |
| 2180    | 3919.7  | 31856    | 11601.105  | 9916.55    | -0.23 |
| 7799300 | 8916200 | 16123000 | 10681575   | 10224225   | -0.06 |
| 140910  | 313520  | 105240   | 153528.75  | 166500     | 0.12  |
| 11618   | 24392   | 26685    | 14654.6    | 16378.425  | 0.16  |
| 71476   | 3265.6  | 27152    | 38988.5    | 34033.9    | -0.20 |
| 2451.9  | 44100   | 3243.1   | 11815.575  | 13548.625  | 0.20  |
| 131830  | 89181   | 149380   | 110578.25  | 121140.25  | 0.13  |
| 4627600 | 2869300 | 3109100  | 3663225    | 3801125    | 0.05  |
| 1459700 | 1147500 | 1313000  | 1490725    | 1410000    | -0.08 |
| 665600  | 472350  | 512190   | 591982.5   | 560265     | -0.08 |
| 47168   | 34562   | 29795    | 37068.9    | 42029.75   | 0.18  |
| 39609   | 8766.2  | 36943    | 19137.6    | 21576.19   | 0.17  |
| 495.65  | 36371   | 16637    | 16270.25   | 14582.1875 | -0.16 |
| 27234   | 5046    | 45814    | 24897.925  | 27874.5    | 0.16  |
| 374040  | 377840  | 402240   | 320712.5   | 343142.5   | 0.10  |
| 18799   | 21713   | 13476    | 18227.625  | 16355.25   | -0.16 |
| 73589   | 115790  | 227940   | 119514.125 | 129125.75  | 0.11  |
| 32059   | 38571   | 32596    | 27127.775  | 29610      | 0.13  |
| 8247.9  | 32167   | 35471    | 22966.25   | 25387.975  | 0.14  |
| 9950.8  | 21276   | 128140   | 41834.5    | 46339.2    | 0.15  |

|         |         |         |           |            |       |
|---------|---------|---------|-----------|------------|-------|
| 17755   | 4484.8  | 23236   | 12891.825 | 14166.7    | 0.14  |
| 162580  | 228300  | 162860  | 191765    | 181220     | -0.08 |
| 34576   | 24753   | 4948.1  | 21360.75  | 23554.025  | 0.14  |
| 51674   | 39992   | 238260  | 91945.25  | 100314.5   | 0.13  |
| 48454   | 32213   | 153110  | 81559.425 | 74904      | -0.12 |
| 38895   | 37348   | 21607   | 22498.325 | 25048.975  | 0.15  |
| 48231   | 93795   | 72040   | 58289     | 62766.5    | 0.11  |
| 2142.1  | 18168   | 2802.7  | 6067.8275 | 6819.925   | 0.17  |
| 118260  | 92285   | 89038   | 92965.25  | 99182.25   | 0.09  |
| 721710  | 621500  | 690170  | 718387.5  | 682825     | -0.07 |
| 30175   | 30128   | 31567   | 23798.4   | 26162.5    | 0.14  |
| 61167   | 89075   | 22618   | 67028.7   | 61372.75   | -0.13 |
| 377040  | 341030  | 25429   | 252287.25 | 267447.25  | 0.08  |
| 4773    | 7085    | 18905   | 12610.025 | 11635.5    | -0.12 |
| 337030  | 347290  | 317540  | 288537.25 | 308770     | 0.10  |
| 529520  | 466720  | 554220  | 520522.5  | 500015     | -0.06 |
| 81083   | 11705   | 14439   | 25154.975 | 27593.575  | 0.13  |
| 38134   | 9983.7  | 28413   | 30284.6   | 27568.675  | -0.14 |
| 263770  | 345400  | 478770  | 399532    | 375255     | -0.09 |
| 7769300 | 4665900 | 5568700 | 6115600   | 6322300    | 0.05  |
| 37042   | 176070  | 120750  | 93893.25  | 100502     | 0.10  |
| 105840  | 17178   | 37918   | 37129.425 | 40472.3475 | 0.12  |
| 21895   | 32175   | 177100  | 88097.5   | 80782.75   | -0.13 |
| 1435600 | 1458800 | 1200600 | 1447640   | 1510150    | 0.06  |
| 23384   | 27858   | 30620   | 32844.3   | 30682.25   | -0.10 |
| 17215   | 16731   | 16557   | 21593.95  | 23476      | 0.12  |
| 72275   | 6365.1  | 47685   | 60441     | 56658.775  | -0.09 |
| 8506    | 67880   | 31945   | 29821.375 | 27402.4    | -0.12 |
| 25915   | 54014   | 23087   | 24488.375 | 26467.475  | 0.11  |
| 19318   | 11488   | 78263   | 28350.2   | 30668.5    | 0.11  |
| 265960  | 355480  | 217310  | 235287.5  | 245327.5   | 0.06  |
| 896640  | 1341000 | 1328600 | 1142275   | 1093462.5  | -0.06 |
| 8068.9  | 20920   | 2389.2  | 10812.95  | 9983.225   | -0.12 |
| 589100  | 672280  | 544100  | 592285    | 615877.5   | 0.06  |
| 24771   | 33043   | 260490  | 79856.75  | 86179.5    | 0.11  |
| 45315   | 47011   | 78162   | 49850     | 46841.5    | -0.09 |
| 57499   | 54219   | 40731   | 55824.5   | 52804.75   | -0.08 |
| 138970  | 177110  | 96348   | 122977    | 129709.5   | 0.08  |
| 19634   | 22206   | 24226   | 16201.475 | 17380.5    | 0.10  |
| 50957   | 61513   | 59558   | 58086.575 | 54889.75   | -0.08 |
| 62558   | 107220  | 91570   | 70704.25  | 75307.75   | 0.09  |
| 239290  | 194560  | 243950  | 178185.5  | 185770.25  | 0.06  |

|          |         |         |           |           |       |
|----------|---------|---------|-----------|-----------|-------|
| 44461    | 71235   | 68150   | 52636.5   | 55455     | 0.08  |
| 178930   | 102620  | 25580   | 85826.25  | 80407.5   | -0.09 |
| 25746    | 29725   | 33014   | 27242.75  | 28780.25  | 0.08  |
| 9481.7   | 57057   | 71238   | 36299     | 38745.925 | 0.09  |
| 14816    | 9286.4  | 8924    | 15182.825 | 14325.1   | -0.08 |
| 17192    | 34963   | 56085   | 45195     | 42985.5   | -0.07 |
| 20146    | 123360  | 25672   | 59659.25  | 56421     | -0.08 |
| 23683    | 14788   | 130340  | 51043.775 | 47983.75  | -0.09 |
| 24356    | 9553.7  | 38126   | 19457.25  | 20714.425 | 0.09  |
| 37606    | 39848   | 30538   | 41102.25  | 38967.25  | -0.08 |
| 14589    | 25448   | 5456.8  | 18640     | 17568.45  | -0.09 |
| 6543.1   | 7965.9  | 20921   | 11930.1   | 12687.25  | 0.09  |
| 115960   | 149720  | 102780  | 138738.5  | 134467.5  | -0.05 |
| 4598.7   | 6979.4  | 92803   | 24350.2   | 26163.185 | 0.10  |
| 33619    | 6022.6  | 16782   | 16319.225 | 15410.675 | -0.08 |
| 352940   | 225830  | 246540  | 305205    | 317265    | 0.06  |
| 12996    | 34485   | 37005   | 22752.25  | 24022.5   | 0.08  |
| 69819    | 135100  | 95820   | 95843.5   | 92474.5   | -0.05 |
| 630380   | 1307600 | 1093100 | 898970    | 923715    | 0.04  |
| 3670     | 7901.2  | 13489   | 8369.825  | 8802.8    | 0.07  |
| 62978    | 36824   | 44355   | 46615.825 | 48992.25  | 0.07  |
| 224070   | 222930  | 266250  | 219243    | 225022.5  | 0.04  |
| 13889    | 49571   | 58794   | 30598.625 | 32228     | 0.07  |
| 74527    | 36862   | 49040   | 54884.25  | 52761     | -0.06 |
| 17214    | 58678   | 84726   | 55441.25  | 53111.75  | -0.06 |
| 93595    | 58155   | 95342   | 73260     | 76112     | 0.06  |
| 185660   | 174670  | 112260  | 118905.75 | 123403.75 | 0.05  |
| 134910   | 163310  | 194290  | 177401    | 172467.5  | -0.04 |
| 5506.1   | 11042   | 10160   | 10832.125 | 10310.525 | -0.07 |
| 4654800  | 3954700 | 4256000 | 4147575   | 4090525   | -0.02 |
| 11045000 | 8370000 | 9967400 | 9911325   | 10068100  | 0.02  |
| 67796    | 165060  | 100620  | 109924.5  | 106399.5  | -0.05 |
| 191680   | 235640  | 170680  | 259763.75 | 252240    | -0.04 |
| 20210    | 30469   | 25574   | 19626.1   | 20376.425 | 0.05  |
| 16932    | 10903   | 13680   | 12663.975 | 13116.75  | 0.05  |
| 317120   | 213920  | 255250  | 257367.5  | 262932.5  | 0.03  |
| 10473    | 14849   | 13238   | 10501.625 | 10874.75  | 0.05  |
| 8974.7   | 12414   | 9629.5  | 16846.85  | 17443.8   | 0.05  |
| 36732    | 43528   | 42001   | 38044.5   | 38983.75  | 0.04  |
| 2629400  | 1347900 | 1834100 | 1846000   | 1820900   | -0.02 |
| 11020000 | 5484100 | 5916100 | 6668775   | 6772600   | 0.02  |
| 54486    | 365640  | 249660  | 189910    | 193024    | 0.02  |

|         |         |         |            |           |       |
|---------|---------|---------|------------|-----------|-------|
| 1613300 | 770670  | 752000  | 994815     | 981480    | -0.02 |
| 261660  | 179880  | 194330  | 202880     | 200610    | -0.02 |
| 148590  | 88323   | 77177   | 132754.25  | 134077.5  | 0.01  |
| 23060   | 12789   | 22454   | 16294.7    | 15915.15  | -0.03 |
| 125570  | 180090  | 106060  | 130432.25  | 131632.5  | 0.01  |
| 4139900 | 4351600 | 3797900 | 4306650    | 4281875   | -0.01 |
| 6672.4  | 6829.3  | 3572.6  | 5608.975   | 5474.975  | -0.03 |
| 5321.9  | 6182.7  | 4605.8  | 4133.35    | 4239.55   | 0.04  |
| 6281.6  | 20961   | 5104.9  | 9825.85    | 9632.375  | -0.03 |
| 263870  | 310400  | 317850  | 266362.5   | 269160    | 0.02  |
| 82884   | 99358   | 54016   | 86412.5    | 87517     | 0.02  |
| 45416   | 7857.1  | 43955   | 28158.025  | 28598.275 | 0.02  |
| 1212200 | 207940  | 1529900 | 873875     | 864657.5  | -0.02 |
| 12277   | 12504   | 190100  | 66576.55   | 64962     | -0.04 |
| 160320  | 168540  | 125210  | 154957.75  | 152972.5  | -0.02 |
| 14029   | 28392   | 10919   | 16164      | 16431.5   | 0.02  |
| 5340100 | 4061100 | 3856000 | 4740150    | 4780950   | 0.01  |
| 10144   | 11228   | 38083   | 18513.025  | 18127     | -0.03 |
| 1258100 | 627370  | 550990  | 784920     | 777832.5  | -0.01 |
| 678270  | 448610  | 496040  | 560707.5   | 556845    | -0.01 |
| 9025.6  | 17192   | 14792   | 12927.44   | 13110.9   | 0.02  |
| 111100  | 97898   | 50431   | 82533.85   | 81598.25  | -0.02 |
| 634450  | 744350  | 688720  | 565107.5   | 561595    | -0.01 |
| 581300  | 390840  | 278770  | 473302.5   | 470165    | -0.01 |
| 92803   | 102050  | 124920  | 102891.25  | 102214.25 | -0.01 |
| 103620  | 48221   | 87355   | 151666     | 150666.5  | -0.01 |
| 15404   | 16906   | 10519   | 12687.8    | 12762.625 | 0.01  |
| 80336   | 22107   | 6726    | 28288.6875 | 28171.8   | -0.01 |
| 1957.3  | 4464.1  | 33244   | 11068.3    | 11024.7   | -0.01 |
| 165260  | 113750  | 126020  | 139901     | 140167.5  | 0.00  |
| 5377.3  | 5128.6  | 4759.4  | 4705.16    | 4694.05   | 0.00  |
| 61080   | 80023   | 134050  | 87060.15   | 87050.75  | 0.00  |
| 1145700 | 201110  | 1371400 | 804407.5   | 805597.5  | 0.00  |
| 76442   | 63882   | 41796   | 51635.775  | 51630.25  | 0.00  |
