# Supplementary material
Source: PubMed Central journal article supplement (PMC6543812)
Supplement: NIHMS1026625-supplement-Supp_TableS2.pdf [file NIHMS1026625-supplement-Supp_TableS2.pdf]

| UniProt | Acce | Protein Name   | P7 Mouse 1 | P7 Mouse 2 | P7 Mouse 3 | P7 Mouse 4 | P42 Mouse 1 |
|---------|------|----------------|------------|------------|------------|------------|-------------|
| Q03265  |      | ATP synthase   | 15885000   | 15521000   | 12083000   | 13160000   | 66235000    |
| Q8BHS8  |      | Syntabulin O   | 212360     | 218550     | 331800     | 228880     | 23455       |
| Q91VD9  |      | NADH-ubiqui    | 1440300    | 1275200    | 1413100    | 941380     | 3355900     |
| Q9DCW4  |      | Electron tran  | 14857      | 37857      | 22106      | 13443      | 787140      |
| P70404  |      | Isocitrate del | 103080     | 125900     | 66142      | 264860     | 1097600     |
| Q9CQ54  |      | NADH dehyd     | 210000     | 555240     | 224670     | 528320     | 1180200     |
| Q9CPQ3  |      | Mitochondria   | 4760300    | 3612100    | 3559400    | 2933200    | 673070      |
| Q99KI0  |      | Aconitate hy   | 4632500    | 4799500    | 4461200    | 3768500    | 12008000    |
| P30275  |      | Creatine kina  | 1818200    | 2197000    | 1292400    | 905110     | 5414800     |
| Q9CRB8  |      | Mitochondria   | 53452      | 419150     | 206270     | 62880      | 833550      |
| P99027  |      | 60S acidic rib | 213700     | 301860     | 282260     | 229660     | 74083       |
| Q8BMF4  |      | Dihydrolipoy   | 225570     | 1887600    | 1491000    | 811170     | 2131400     |
| Q99LC5  |      | Electron tran  | 42493      | 58823      | 56710      | 81983      | 861150      |
| P08249  |      | Malate dehy    | 9798900    | 10694000   | 20648000   | 13419000   | 19369000    |
| Q8BH04  |      | Phosphoenol    | 84515      | 127130     | 105310     | 71602      | 559500      |
| Q8BP92  |      | Reticulocalbi  | 171910     | 184390     | 326540     | 261410     | 57760       |
| O35658  |      | Complement     | 1778500    | 1430700    | 842770     | 1134500    | 619210      |
| P60904  |      | DnaJ homolo    | 71454      | 66295      | 28975      | 29902      | 150840      |
| Q9WTQ8  |      | Mitochondria   | 206040     | 270950     | 223110     | 180650     | 95384       |
| Q9D172  |      | ES1 protein h  | 275330     | 273040     | 43511      | 20017      | 711240      |
| Q91WS0  |      | CDGSH iron-s   | 662380     | 820610     | 954840     | 1470900    | 1758100     |
| P60710  |      | Actin, cytopl  | 1508300    | 875230     | 2308800    | 2509000    | 50152       |
| Q6A058  |      | Armadillo rep  | 98947      | 113570     | 101920     | 81240      | 4450.2      |
| Q9JLZ3  |      | Methylglutac   | 492950     | 713930     | 321110     | 288060     | 1446200     |
| O08749  |      | Dihydrolipoy   | 48586      | 2086100    | 1133300    | 762610     | 2039000     |
| Q9CY16  |      | 28S ribosoma   | 320050     | 676370     | 414850     | 561730     | 195870      |
| Q9CQC7  |      | NADH dehyd     | 558150     | 563650     | 470820     | 2273700    | 1853700     |
| Q99KR7  |      | Peptidyl-prol  | 4168.6     | 1398.8     | 975.5      | 8117.2     | 48520       |
| Q9D1G1  |      | Ras-related p  | 101200     | 63053      | 17923      | 7695.2     | 185100      |
| Q6PDS3  |      | Sterile alpha  | 238030     | 354940     | 281830     | 268950     | 61812       |
| P09671  |      | Superoxide d   | 1761700    | 1870900    | 2531900    | 2482600    | 4576300     |
| Q9CZR8  |      | Elongation fa  | 46844      | 30034      | 53097      | 43615      | 250310      |
| Q9CZU6  |      | Citrate synth  | 28258000   | 24517000   | 23211000   | 21922000   | 9297000     |
| P24369  |      | Peptidyl-prol  | 327280     | 261400     | 337450     | 117810     | 87588       |
| A2ASZ8  |      | Calcium-bind   | 55341      | 22902      | 34818      | 51138      | 486700      |
| Q80Y14  |      | Glutaredoxin   | 2152200    | 2149900    | 2383100    | 2302700    | 960390      |
| Q8BLN5  |      | Lanosterol sy  | 114980     | 121720     | 120640     | 114830     | 10027       |
| P17710  |      | Hexokinase-1   | 1462200    | 1378300    | 667810     | 558320     | 2307400     |
| P14131  |      | 40S ribosoma   | 133120     | 101730     | 110460     | 175500     | 26905       |
| Q99N89  |      | 39S ribosoma   | 516810     | 266830     | 568510     | 574820     | 164130      |
| D3Z7P3  |      | Glutaminase    | 1021500    | 1202500    | 965620     | 789660     | 2626300     |

|        |                |          |          |          |          |          |
|--------|----------------|----------|----------|----------|----------|----------|
| Q9Z0V7 | Mitochondri    | 445850   | 416940   | 392190   | 339820   | 148210   |
| P97450 | ATP synthase   | 492000   | 1048000  | 1505000  | 889940   | 2215000  |
| P52480 | Pyruvate kin   | 147730   | 330960   | 138220   | 203880   | 689030   |
| Q9CQ69 | Cytochrome     | 826610   | 929560   | 1117500  | 2246300  | 1093400  |
| P50516 | V-type proto   | 223800   | 153010   | 127600   | 78453    | 375050   |
| Q8QZT1 | Acetyl-CoA a   | 11169000 | 11112000 | 13898000 | 12536000 | 7073600  |
| Q9WUR9 | Adenylate kin  | 170860   | 345120   | 296660   | 482620   | 828860   |
| Q99KK9 | Probable hist  | 236580   | 214160   | 228440   | 209990   | 93086    |
| Q8CD10 | Calcium upta   | 159170   | 128090   | 137050   | 135530   | 22401    |
| Q921H9 | Cytochrome     | 234010   | 369740   | 609120   | 567470   | 150380   |
| Q99MB2 | Mitochondri    | 291460   | 227490   | 103740   | 27509    | 28572    |
| O08599 | Syntaxin-bin   | 548280   | 715710   | 239620   | 211140   | 1614200  |
| Q8K1Z0 | Ubiquinone b   | 68678    | 58716    | 48018    | 68038    | 167250   |
| P55096 | ATP-binding    | 91422    | 105110   | 281720   | 160350   | 31848    |
| Q8K009 | Mitochondri    | 429190   | 1098500  | 446600   | 301630   | 177160   |
| Q9D6U8 | Protein FAM    | 103840   | 21376    | 36055    | 45896    | 159120   |
| Q9CYH2 | Redox-regula   | 317340   | 634840   | 316630   | 248240   | 986500   |
| P63017 | Heat shock c   | 9664     | 232930   | 10131    | 15197    | 344020   |
| Q8BMG8 | Mitochondri    | 55579    | 30050    | 68440    | 11955    | 40099    |
| Q9CQ40 | 39S ribosoma   | 310790   | 447110   | 505940   | 393670   | 167890   |
| Q9JHS4 | ATP-depende    | 434290   | 580440   | 596770   | 504790   | 274080   |
| Q61425 | Hydroxyacyl-   | 37949    | 279440   | 57853    | 40292    | 168410   |
| Q791T5 | Mitochondri    | 260940   | 435660   | 279180   | 136210   | 31679    |
| Q9Z110 | Delta-1-pyrr   | 506600   | 570170   | 681190   | 632920   | 232050   |
| P16330 | 2',3'-cyclic-n | 135680   | 66996    | 138680   | 110160   | 305870   |
| Q6PCP5 | Mitochondri    | 23692    | 18429    | 11790    | 47961    | 217470   |
| P58064 | 28S ribosoma   | 54208    | 58580    | 314170   | 268460   | 3248.8   |
| Q9D6R2 | Isocitrate del | 8373100  | 10927000 | 10760000 | 8607000  | 15932000 |
| Q9JJG9 | Nitric oxide-e | 7661.5   | 8735.9   | 1830400  | 1911600  | 15447    |
| Q8BWT1 | 3-ketoacyl-Co  | 1735000  | 1756200  | 1562800  | 1300300  | 619810   |
| O08734 | Bcl-2 homolc   | 205390   | 240570   | 255330   | 229110   | 83458    |
| P05202 | Aspartate ar   | 1744100  | 2398000  | 3364300  | 2300900  | 3301800  |
| Q9WVLO | Maleylaceto    | 11162    | 153620   | 9989.4   | 31582    | 21518    |
| Q8BMS1 | Trifunctional  | 154220   | 15453    | 275640   | 263350   | 356270   |
| Q7TMF3 | NADH dehyd     | 617590   | 617590   | 458380   | 416970   | 2485700  |
| Q62425 | Cytochrome     | 3646000  | 5739700  | 3663200  | 3625600  | 6311100  |
| Q8BX10 | Serine/threo   | 1549700  | 1211700  | 1091700  | 1317900  | 390370   |
| P50431 | Serine hydro   | 111830   | 134500   | 825420   | 906030   | 46137    |
| Q64516 | Glycerol kina  | 692650   | 1715400  | 844110   | 613420   | 1794100  |
| Q9D1I6 | 39S ribosoma   | 622520   | 634030   | 718830   | 692630   | 190930   |
| Q9CQA6 | Coiled-coil-h  | 152690   | 233190   | 346150   | 353010   | 100540   |
| Q91YT0 | NADH dehyd     | 801880   | 3293000  | 721290   | 729140   | 3117400  |

|        |                |         |         |         |         |         |
|--------|----------------|---------|---------|---------|---------|---------|
| Q9D8E6 | 60S ribosoma   | 212410  | 165370  | 79231   | 206620  | 50470   |
| Q9CR62 | Mitochondria   | 1296800 | 1430500 | 1499100 | 1364000 | 2046500 |
| P08228 | Superoxide d   | 6448.5  | 12444   | 28101   | 34308   | 40418   |
| Q9D855 | Cytochrome     | 80316   | 57640   | 27806   | 98295   | 246940  |
| P31786 | Acyl-CoA-bin   | 518140  | 499160  | 281440  | 369480  | 145270  |
| Q6P3A8 | 2-oxoisovaler  | 177450  | 134990  | 406720  | 350600  | 9506.5  |
| Q60936 | Atypical kina  | 12715   | 11440   | 49694   | 8684.8  | 171410  |
| Q9DC71 | 28S ribosoma   | 7465.1  | 11771   | 1886    | 982.71  | 6552.4  |
| P16858 | Glyceraldehy   | 39285   | 91693   | 77928   | 59904   | 351700  |
| Q68FD5 | Clathrin heav  | 669040  | 683020  | 426640  | 334530  | 1179000 |
| O88986 | 2-amino-3-ke   | 61718   | 84942   | 442090  | 428320  | 41817   |
| P54869 | Hydroxymetf    | 114650  | 163140  | 331420  | 505070  | 49479   |
| Q9D964 | Glycine amid   | 195760  | 195200  | 167920  | 96616   | 41304   |
| Q61578 | NADPH:adre     | 241450  | 220220  | 250160  | 218280  | 131000  |
| Q8BVI4 | Dihydropteri   | 12947   | 17553   | 5094.7  | 14609   | 64176   |
| P63011 | Ras-related p  | 50597   | 47938   | 23838   | 16202   | 114030  |
| Q9CQR4 | Acyl-coenzyn   | 322180  | 557490  | 575390  | 551320  | 1280900 |
| P17182 | Alpha-enolas   | 90544   | 229020  | 119660  | 73725   | 379390  |
| O35972 | 39S ribosoma   | 155770  | 156760  | 179380  | 161210  | 18489   |
| Q9CQE3 | 28S ribosoma   | 452700  | 466470  | 491500  | 434420  | 180950  |
| Q8VE22 | 28S ribosoma   | 1446400 | 1280600 | 1018000 | 903740  | 317170  |
| P14869 | 60S acidic rib | 247430  | 149790  | 157410  | 192300  | 73197   |
| Q99JB2 | Stomatin-like  | 35613   | 67735   | 22364   | 8130.3  | 253110  |
| Q9CZS1 | Aldehyde del   | 436710  | 529980  | 516560  | 451710  | 277290  |
| P58059 | 28S ribosoma   | 893970  | 864130  | 825280  | 808250  | 354430  |
| Q9D3D9 | ATP synthase   | 74310   | 48931   | 80811   | 59754   | 148840  |
| Q8BTX9 | Inactive hydr  | 340710  | 449770  | 433690  | 355850  | 164220  |
| P54071 | Isocitrate del | 1125800 | 2505100 | 2406100 | 2209200 | 798280  |
| Q9DC69 | NADH dehyd     | 77993   | 51689   | 32308   | 20815   | 890290  |
| P14148 | 60S ribosoma   | 266820  | 227540  | 157140  | 198850  | 117340  |
| Q6GQS1 | Calcium-bind   | 14138   | 121030  | 51226   | 39196   | 95941   |
| Q80U23 | Syntaphilin C  | 13886   | 17980   | 28938   | 14238   | 78580   |
| Q62442 | Vesicle-assoc  | 303510  | 233230  | 76466   | 56851   | 614430  |
| Q8K3J1 | NADH dehyd     | 61313   | 45817   | 28834   | 7877.2  | 68824   |
| Q91V92 | ATP-citrate s  | 491940  | 428730  | 242840  | 193470  | 103190  |
| Q8C5Q4 | G-rich seque   | 160860  | 181810  | 170000  | 149550  | 86634   |
| Q3UHB1 | 5'-nucleotida  | 63293   | 73577   | 108660  | 109000  | 145900  |
| Q9CTY5 | Calcium upta   | 74044   | 151220  | 44369   | 49416   | 290060  |
| O55042 | Alpha-synucl   | 45559   | 32894   | 1285.3  | 81188   | 103510  |
| Q8K2Y7 | 39S ribosoma   | 52377   | 19373   | 144450  | 35778   | 317040  |
| Q9JK42 | [Pyruvate de   | 104770  | 531190  | 367920  | 275520  | 517140  |
| Q99LB2 | Dehydrogen     | 98809   | 49555   | 51810   | 130530  | 161900  |

|        |                 |          |          |          |          |          |
|--------|-----------------|----------|----------|----------|----------|----------|
| Q8R1I1 | Cytochrome      | 76595    | 108860   | 90584    | 104180   | 161560   |
| Q9DCU6 | 39S ribosoma    | 517500   | 798610   | 640500   | 957130   | 329340   |
| P14152 | Malate dehyd    | 359750   | 365520   | 190200   | 172310   | 170260   |
| Q9D1H6 | NADH dehyd      | 22283    | 64107    | 15433    | 2930.9   | 59893    |
| P14211 | Calreticulin C  | 243500   | 294450   | 357440   | 344380   | 97283    |
| Q78J03 | Methionine-l    | 128520   | 864530   | 133350   | 963420   | 170860   |
| P09411 | Phosphoglyc     | 68331    | 123400   | 87109    | 67991    | 295950   |
| Q9D0S9 | Histidine tria  | 296180   | 247580   | 274220   | 196800   | 571520   |
| Q9CXZ1 | NADH dehyd      | 289770   | 555380   | 163920   | 436760   | 1382800  |
| Q9D1L0 | Coiled-coil-h   | 12612    | 9253.3   | 863140   | 840630   | 17710    |
| Q9QZH6 | Evolutionaril   | 302790   | 372640   | 358460   | 371060   | 194180   |
| Q9CR88 | 28S ribosoma    | 264070   | 254160   | 146950   | 115150   | 117720   |
| Q3UIU2 | NADH dehyd      | 10086    | 38824    | 54797    | 17238    | 17210    |
| Q60714 | Long-chain fa   | 195180   | 212980   | 188220   | 226510   | 108660   |
| P17751 | Triosephosph    | 108790   | 36476    | 70484    | 131210   | 167670   |
| P56480 | ATP synthase    | 46306000 | 42399000 | 37229000 | 31068000 | 51266000 |
| Q9CQV7 | Mitochondria    | 241380   | 251990   | 265400   | 304910   | 156240   |
| P99029 | Peroxioredoxi   | 3855300  | 7615400  | 6052300  | 3386300  | 8538600  |
| Q99N96 | 39S ribosoma    | 267890   | 291470   | 304160   | 233110   | 93609    |
| Q3UUI3 | Acyl-coenzym    | 580170   | 491790   | 335080   | 736340   | 923330   |
| P67778 | Prohibitin OS   | 13514000 | 12668000 | 10127000 | 10099000 | 8523300  |
| Q9WUM5 | Succinate--Co   | 448120   | 337200   | 406120   | 868890   | 511740   |
| Q9CR68 | Cytochrome      | 2040900  | 2106800  | 1006500  | 953410   | 2448300  |
| Q8BVU5 | ADP-ribose p    | 90485    | 103920   | 99896    | 76158    | 55561    |
| Q91YY4 | ATP synthase    | 52987    | 57775    | 263620   | 263610   | 13270    |
| O08756 | 3-hydroxyacy    | 1548700  | 1531400  | 1739700  | 1250100  | 1004600  |
| Q99LC3 | NADH dehyd      | 722920   | 1496600  | 435360   | 92612    | 1332000  |
| Q9CQE1 | Protein NipSi   | 328910   | 639230   | 1014400  | 1144800  | 226490   |
| Q8VCM4 | Lipoyltransfe   | 416630   | 394910   | 526970   | 47880    | 617470   |
| Q9Z0S1 | 3'(2'),5'-bispl | 40101    | 38749    | 41444    | 107670   | 84384    |
| P12787 | Cytochrome      | 2475300  | 6732900  | 3248100  | 2742400  | 4335500  |
| P56135 | ATP synthase    | 147500   | 176950   | 330480   | 164650   | 132370   |
| Q9Z0R9 | Fatty acid de   | 85509    | 69213    | 51731    | 99861    | 7639.4   |
| Q9CQU0 | Thioredoxin c   | 28744    | 56574    | 63791    | 139870   | 11958    |
| P03888 | NADH-ubiqui     | 57067    | 50153    | 128130   | 84218    | 79606    |
| P09925 | Surfeit locus   | 30714    | 19464    | 22419    | 33169    | 203100   |
| Q99JY0 | Trifunctional   | 16576    | 10123    | 5629.8   | 15773    | 40401    |
| Q922B1 | O-acetyl-ADF    | 9057.4   | 71606    | 41345    | 51340    | 42684    |
| Q9D1B9 | 39S ribosoma    | 278600   | 335000   | 380140   | 473940   | 232690   |
| Q9D0K2 | Succinyl-CoA    | 334330   | 566910   | 411140   | 225730   | 444650   |
| P51175 | Protoporphyr    | 81164    | 62532    | 193060   | 186200   | 111570   |
| Q9WU79 | Proline dehyd   | 163500   | 41228    | 46635    | 88620    | 91013    |

|        |                |         |         |         |         |         |
|--------|----------------|---------|---------|---------|---------|---------|
| Q8VCL2 | Protein SCO2   | 157150  | 176390  | 161150  | 167280  | 84827   |
| Q3TL26 | Dimethylade    | 85749   | 65947   | 65899   | 72823   | 5283.5  |
| P62077 | Mitochondria   | 106260  | 156330  | 431230  | 379670  | 128980  |
| Q91ZE0 | Trimethyllysi  | 50391   | 63422   | 76361   | 74468   | 14266   |
| Q9CQN1 | Heat shock p   | 410150  | 392550  | 489060  | 356820  | 230340  |
| Q91WM2 | Haloacid deh   | 17073   | 8809.7  | 22908   | 1272.2  | 41717   |
| Q9CXD6 | Mitochondria   | 175780  | 182880  | 118110  | 78954   | 36599   |
| Q5SWT3 | Solute carrier | 22554   | 14826   | 11002   | 5620.6  | 43380   |
| Q9CRA7 | ATP synthase   | 40477   | 112350  | 85606   | 75217   | 96968   |
| Q9JKF7 | 39S ribosoma   | 554960  | 1039500 | 428860  | 330610  | 475780  |
| Q91YM4 | Protein TBRC   | 151160  | 124160  | 139820  | 87015   | 70630   |
| Q8CAQ8 | MICOS comp     | 1389500 | 1619600 | 1923100 | 2111100 | 3279600 |
| Q8R164 | Valacyclovir l | 149740  | 115810  | 266940  | 209190  | 136510  |
| Q9D6K8 | FUN14 doma     | 56049   | 8447.7  | 116100  | 48505   | 161290  |
| P38647 | Stress-70 prc  | 2134800 | 4481200 | 1363900 | 1104800 | 5272800 |
| Q9CWE0 | Mitochondria   | 37566   | 65178   | 16619   | 21214   | 98959   |
| Q9CQ92 | Mitochondria   | 47328   | 26470   | 17666   | 16004   | 273300  |
| Q99JT1 | Glutamyl-tRN   | 165090  | 204070  | 189690  | 184660  | 134000  |
| Q8BMF3 | NADP-depen     | 128670  | 103300  | 47021   | 50373   | 185690  |
| Q9CZ13 | Cytochrome     | 1517000 | 1297100 | 237810  | 5173900 | 1183000 |
| Q91WC3 | Long-chain-fa  | 41840   | 41154   | 11958   | 26769   | 368260  |
| Q811U4 | Mitofusin-1 C  | 127830  | 83129   | 79041   | 69793   | 36375   |
| Q9CQX8 | 28S ribosoma   | 492340  | 1213300 | 495690  | 346020  | 1205200 |
| Q8K4Z3 | NAD(P)H-hyc    | 8546.6  | 101020  | 25298   | 39781   | 92890   |
| Q9CRD0 | OCIA domain    | 11656   | 5129.1  | 1759.4  | 4326.5  | 4663.2  |
| Q9Z218 | Succinate--Co  | 536650  | 469690  | 517200  | 506480  | 209160  |
| Q9DCC8 | Mitochondria   | 918940  | 705630  | 787760  | 774990  | 581100  |
| Q9DB77 | Cytochrome     | 2972300 | 2807100 | 2609700 | 2202200 | 4121800 |
| Q8BUY5 | Complex I as   | 213060  | 218930  | 255170  | 247780  | 147690  |
| Q8BK03 | Mitoguardin    | 82136   | 71881   | 34751   | 45348   | 128580  |
| Q8BH59 | Calcium-bind   | 3524400 | 4565400 | 4462400 | 4152200 | 6990400 |
| Q4KMM3 | Oxidation res  | 6698.2  | 154700  | 167410  | 31437   | 26918   |
| Q8K2T4 | Ubiquinol-cy   | 29033   | 14950   | 38009   | 35908   | 54690   |
| P97287 | Induced mye    | 76293   | 52918   | 56621   | 39628   | 1713.5  |
| P51660 | Peroxisomal    | 125610  | 193440  | 301530  | 270030  | 156700  |
| P56379 | 6.8 kDa mito   | 252750  | 206620  | 533100  | 1630700 | 268380  |
| Q99JR6 | Nicotinamide   | 19499   | 55995   | 68953   | 74621   | 26164   |
| Q6ZWN5 | 40S ribosoma   | 98720   | 8191.1  | 86838   | 215810  | 73246   |
| Q3UJU9 | Regulator of   | 366070  | 436250  | 271950  | 373790  | 1003800 |
| Q99J39 | Malonyl-CoA    | 79258   | 109780  | 195830  | 131110  | 164510  |
| Q9DBG3 | AP-2 comple    | 102480  | 180550  | 105680  | 115780  | 208350  |
| P97807 | Fumarate hy    | 413490  | 534610  | 224730  | 153660  | 510760  |

|        |                |         |         |         |         |         |
|--------|----------------|---------|---------|---------|---------|---------|
| Q91YJ5 | Translation in | 51557   | 211200  | 292130  | 278460  | 87647   |
| Q9DBF1 | Alpha-amino    | 31076   | 5461.5  | 13273   | 25060   | 12976   |
| Q9CQS4 | Solute carrier | 58990   | 95991   | 92477   | 52305   | 150900  |
| Q9WTP6 | Adenylate kin  | 16172   | 5316.2  | 4652.8  | 4774.3  | 181660  |
| Q8BW75 | Amine oxidase  | 49791   | 34332   | 18149   | 32877   | 74162   |
| Q3U186 | Probable arg   | 721600  | 57318   | 722000  | 116380  | 49555   |
| Q8K0Z7 | Translational  | 127580  | 150230  | 354460  | 276910  | 57044   |
| Q8R123 | FAD synthase   | 54451   | 42273   | 11367   | 7333.8  | 66181   |
| O35435 | Dihydroorota   | 214340  | 214610  | 263040  | 211880  | 154540  |
| Q6NVE9 | Protein phos   | 214290  | 261040  | 176750  | 116340  | 318000  |
| Q3ULD5 | Methylcroton   | 569500  | 590100  | 644050  | 530130  | 295940  |
| Q9CPP6 | NADH dehyd     | 241640  | 221480  | 143040  | 140560  | 1328300 |
| Q9DCS9 | NADH dehyd     | 1312000 | 1013100 | 1244700 | 1102800 | 1320600 |
| Q921H8 | 3-ketoacyl-Co  | 122310  | 111630  | 148630  | 21294   | 17452   |
| P84091 | AP-2 comple    | 12670   | 56482   | 5079.1  | 39332   | 181310  |
| Q9Z2Q5 | 39S ribosoma   | 387770  | 356820  | 324130  | 213190  | 245140  |
| O55125 | Protein NipSi  | 63400   | 192660  | 204510  | 76632   | 14467   |
| P53702 | Cytochrome     | 3475.1  | 32129   | 88106   | 257640  | 1455.1  |
| P03921 | NADH-ubiqui    | 48536   | 11275   | 55363   | 111500  | 12134   |
| Q3TUH1 | Phosphatidat   | 57834   | 4283.9  | 63194   | 54410   | 2367.1  |
| Q9D404 | 3-oxoacyl-[ac  | 143120  | 121420  | 151790  | 104620  | 78329   |
| Q9CPQ8 | ATP synthase   | 15763   | 1118800 | 110780  | 93513   | 3415000 |
| Q99LY9 | NADH dehyd     | 11053   | 8447.6  | 39131   | 10486   | 7832.7  |
| P35486 | Pyruvate def   | 2454800 | 3362200 | 4076700 | 6432000 | 6070800 |
| P47962 | 60S ribosoma   | 30704   | 20787   | 18513   | 136660  | 5815.1  |
| Q9CZ57 | 5-methylcytc   | 63292   | 68338   | 207640  | 273880  | 78860   |
| Q9DCX2 | ATP synthase   | 888760  | 884640  | 904190  | 881260  | 1179400 |
| Q8CHT0 | Delta-1-pyrro  | 413360  | 423440  | 505070  | 458070  | 215920  |
| Q8ROY6 | Cytosolic 10-  | 335880  | 254130  | 55364   | 98405   | 70555   |
| P50544 | Very long-chi  | 626270  | 784770  | 809150  | 627250  | 321610  |
| Q3UN04 | Ubiquitin car  | 88731   | 60849   | 68226   | 62831   | 31801   |
| Q9D023 | Mitochondria   | 32727   | 282030  | 164170  | 117840  | 209310  |
| Q9CQN7 | 39S ribosoma   | 294330  | 240840  | 410260  | 283970  | 180370  |
| Q91WD5 | NADH dehyd     | 858400  | 917070  | 800770  | 621550  | 998820  |
| Q9QYF1 | Retinol dehyd  | 50174   | 35552   | 43693   | 39546   | 15343   |
| Q8BYL4 | Tyrosine--trM  | 25906   | 37593   | 24769   | 7798.6  | 40182   |
| Q61102 | ATP-binding    | 2496.5  | 4429.1  | 5397.4  | 2159    | 4070.7  |
| P85094 | Isochorismat   | 3536.2  | 2111.4  | 1848.9  | 3477.5  | 1985.3  |
| O88696 | ATP-depende    | 1842400 | 2129200 | 2161100 | 1976700 | 1246000 |
| Q91WK1 | SPRY domain    | 234930  | 386920  | 399020  | 368840  | 227880  |
| P63101 | 14-3-3 protei  | 83806   | 131410  | 53005   | 70253   | 51001   |
| Q99J25 | rRNA methyl    | 132680  | 162800  | 130300  | 83165   | 21949   |

|        |                |         |         |         |         |         |
|--------|----------------|---------|---------|---------|---------|---------|
| Q99MR8 | Methylcroton   | 5512.3  | 3573.9  | 12823   | 362.74  | 2404.1  |
| Q9R257 | Heme-bindin    | 44492   | 5865.1  | 10139   | 8571.3  | 24586   |
| Q91VA6 | Polymerase c   | 751050  | 953310  | 644930  | 758160  | 507510  |
| Q3KNM2 | E3 ubiquitin-  | 731670  | 390960  | 563280  | 732880  | 518590  |
| Q3V384 | AFG1-like AT   | 5969.5  | 1196.6  | 2151.1  | 4810.9  | 3698.7  |
| Q9EQ20 | Methylmalor    | 475730  | 611790  | 571190  | 346790  | 377870  |
| Q91VR2 | ATP synthase   | 3193300 | 3034900 | 3350600 | 3495500 | 3642900 |
| Q9DCA2 | 28S ribosoma   | 20696   | 74530   | 107120  | 55017   | 8510.3  |
| P60603 | Reactive oxy   | 156720  | 166350  | 364030  | 346090  | 208800  |
| Q99LB7 | Sarcosine del  | 3895.7  | 5088.5  | 4760    | 2256.4  | 35878   |
| Q9D8Y1 | Transmembr     | 123360  | 691850  | 545630  | 446610  | 196390  |
| O09111 | NADH dehyd     | 410820  | 785940  | 162770  | 148090  | 852650  |
| Q9CQV5 | 28S ribosoma   | 19067   | 45921   | 169780  | 110900  | 19699   |
| Q02053 | Ubiquitin-like | 21642   | 9130.2  | 5302.2  | 6766.3  | 135930  |
| Q61879 | Myosin-10 O    | 83854   | 57877   | 29923   | 27079   | 15543   |
| Q80ZS3 | 28S ribosoma   | 125290  | 43451   | 127880  | 180670  | 97839   |
| Q9ERI6 | Retinol dehy   | 92249   | 216290  | 227300  | 2543400 | 112680  |
| Q99J99 | 3-mercaptop    | 403800  | 343820  | 249380  | 584650  | 110980  |
| Q9CZD5 | Translation ir | 52181   | 14281   | 193650  | 84049   | 27629   |
| Q925I1 | ATPase famil   | 152340  | 266670  | 119300  | 135870  | 404500  |
| P97478 | 5-demethoxy    | 119320  | 192650  | 203570  | 256000  | 30472   |
| Q9CPQ1 | Cytochrome     | 1050800 | 619450  | 381360  | 1476600 | 991400  |
| Q99N92 | 39S ribosoma   | 202480  | 201530  | 114060  | 145210  | 119880  |
| Q9CWX2 | Complex I int  | 160670  | 119230  | 130070  | 246280  | 139450  |
| Q78IK4 | MICOS comp     | 29578   | 21194   | 69463   | 22825   | 96251   |
| Q9CQN3 | Mitochondri    | 407540  | 351240  | 142670  | 130690  | 213010  |
| Q8VEM8 | Phosphate ca   | 3050600 | 2684600 | 3832000 | 3570300 | 3935000 |
| Q8VDT9 | 39S ribosoma   | 114020  | 140130  | 179610  | 143800  | 87807   |
| P61922 | 4-aminobuty    | 391230  | 287410  | 669580  | 630930  | 1276600 |
| Q9CZU4 | GTPase Era, r  | 26165   | 43176   | 43087   | 27241   | 7490.3  |
| Q9CQF8 | Ribosomal pr   | 24593   | 29151   | 27160   | 31704   | 10513   |
| Q9D6J5 | NADH dehyd     | 992680  | 918440  | 978740  | 986720  | 1121400 |
| Q9D051 | Pyruvate del   | 1720900 | 1570500 | 4092800 | 3746200 | 973900  |
| Q61387 | Cytochrome     | 269980  | 314220  | 325330  | 390330  | 157590  |
| Q7TSQ8 | Pyruvate del   | 848260  | 746280  | 733200  | 563650  | 450050  |
| Q78IK2 | Up-regulatec   | 4170400 | 6067900 | 6394900 | 6642900 | 3987700 |
| Q9DCJ5 | NADH dehyd     | 633090  | 620590  | 908110  | 1393600 | 1545100 |
| Q14CH7 | Alanine--tRN   | 78282   | 96939   | 102820  | 67246   | 42617   |
| Q3U2U7 | Methyltransf   | 32215   | 29922   | 5860.5  | 30870   | 5257.1  |
| P62242 | 40S ribosoma   | 10857   | 48064   | 107720  | 169370  | 10700   |
| P52503 | NADH dehyd     | 19969   | 22502   | 12940   | 4983.4  | 300120  |
| P50171 | Estradiol 17-  | 325260  | 139670  | 302240  | 334330  | 98172   |

|        |                |         |         |         |         |          |
|--------|----------------|---------|---------|---------|---------|----------|
| Q8R1S0 | Ubiquinone b   | 7298.3  | 5089    | 2920.9  | 6292.2  | 7173.1   |
| Q80ZK0 | 28S ribosoma   | 158860  | 133610  | 164520  | 131170  | 65116    |
| Q91YQ5 | Dolichyl-diph  | 112220  | 156560  | 206850  | 232940  | 134610   |
| P63325 | 40S ribosoma   | 122290  | 8843.5  | 2358.1  | 7094.4  | 2882.9   |
| P40630 | Transcriptior  | 326390  | 264760  | 212010  | 267600  | 217180   |
| B7ZMP1 | Probable Xaa   | 1406.7  | 1575.6  | 30218   | 34101   | 939.42   |
| P29758 | Ornithine arr  | 161800  | 80415   | 118390  | 45757   | 90157    |
| Q8BQJ6 | tRNA (uracil)  | 13059   | 6036.1  | 238680  | 179620  | 19376    |
| Q8BGC4 | Prostaglandin  | 252660  | 232920  | 514180  | 429430  | 172230   |
| Q9CQF0 | 39S ribosoma   | 113770  | 181820  | 74178   | 3147.3  | 6266.7   |
| Q922Q1 | Mitochondria   | 83493   | 96069   | 1326500 | 1160300 | 52707    |
| Q9R088 | Thymidine ki   | 24988   | 39674   | 30564   | 18082   | 48967    |
| Q9D2R6 | Cytochrome     | 713190  | 634290  | 642710  | 714100  | 415670   |
| P19096 | Fatty acid syn | 165210  | 173660  | 57224   | 20122   | 67807    |
| P47911 | 60S ribosoma   | 73237   | 116810  | 81870   | 94009   | 65994    |
| Q9DAT5 | Mitochondria   | 93074   | 118550  | 117800  | 88343   | 13706    |
| P35980 | 60S ribosoma   | 68054   | 38063   | 31813   | 18351   | 59232    |
| Q9CZ42 | ATP-depende    | 124560  | 868750  | 96621   | 108030  | 568490   |
| Q8VCW8 | Acyl-CoA syn   | 8462.9  | 2255.3  | 1406    | 1335.6  | 39131    |
| Q64133 | Amine oxidas   | 2147900 | 1952100 | 2400300 | 1899600 | 1051700  |
| Q9DCT2 | NADH dehyd     | 6393200 | 9014300 | 5462800 | 2311400 | 10265000 |
| P47738 | Aldehyde del   | 322820  | 1030300 | 445060  | 309800  | 248240   |
| Q9CWG8 | Protein argin  | 158040  | 147960  | 149120  | 109210  | 75919    |
| Q3U5Q7 | UMP-CMP ki     | 103790  | 201780  | 493500  | 265920  | 158780   |
| Q9Z2I9 | Succinate--Co  | 1079200 | 1036500 | 667390  | 510240  | 1517300  |
| Q61171 | Peroxiredoxin  | 6437.1  | 2805.1  | 2278.8  | 3144    | 36612    |
| Q80VL1 | Tudor and Kf   | 4202.9  | 3045.3  | 2387.5  | 5466.7  | 19618    |
| Q8BU88 | 39S ribosoma   | 281850  | 471520  | 417780  | 394270  | 209850   |
| P62897 | Cytochrome     | 98055   | 98860   | 66253   | 100100  | 210740   |
| Q9CQB5 | CDGSH iron-s   | 181070  | 4361.7  | 35984   | 48616   | 32030    |
| P47963 | 60S ribosoma   | 624890  | 635590  | 150490  | 859710  | 782530   |
| Q9CR98 | Protein FAM    | 12096   | 86634   | 31196   | 214650  | 158210   |
| Q9D7P6 | Iron-sulfur cl | 43177   | 166940  | 237730  | 277440  | 26275    |
| P62889 | 60S ribosoma   | 43342   | 81834   | 199340  | 154840  | 50707    |
| Q9D1D4 | Transmembr     | 4235    | 4780.6  | 16681   | 4576.3  | 33753    |
| Q9D0L4 | Uncharacteri   | 147060  | 129260  | 169540  | 173620  | 67118    |
| Q9DB73 | NADH-cytoch    | 764.82  | 4841.2  | 6149.8  | 4729.8  | 5029.6   |
| Q64520 | Guanylate ki   | 4455.4  | 38232   | 11031   | 23122   | 16013    |
| Q9EQI8 | 39S ribosoma   | 18257   | 7878    | 53480   | 63553   | 15237    |
| Q9JIK9 | 28S ribosoma   | 10658   | 16729   | 30371   | 354270  | 10206    |
| Q9CQZ6 | NADH dehyd     | 853030  | 566480  | 874220  | 3042700 | 1299000  |
| O55126 | Protein NipSi  | 369830  | 537630  | 474410  | 93146   | 294190   |



|        |                |         |          |         |         |         |
|--------|----------------|---------|----------|---------|---------|---------|
| Q9CQV1 | Mitochondri    | 5110.3  | 36556    | 6931    | 8471.4  | 1847.9  |
| Q5HZI9 | Solute carrier | 4060.8  | 5245.3   | 6468.7  | 6140.5  | 6511.7  |
| Q3UQ84 | Threonine--t   | 26658   | 28388    | 169090  | 153030  | 7045.3  |
| Q9CZR3 | Mitochondri    | 45918   | 12670    | 19894   | 235130  | 12566   |
| P19157 | Glutathione !  | 52112   | 48172    | 25835   | 18143   | 69114   |
| P61027 | Ras-related p  | 53032   | 65151    | 39467   | 34864   | 479510  |
| P26443 | Glutamate de   | 9986200 | 15676000 | 8513200 | 7143000 | 5831700 |
| Q8VE33 | Ganglioside-i  | 89116   | 121250   | 45172   | 52245   | 47177   |
| Q9WVA2 | Mitochondri    | 39857   | 94227    | 185580  | 109340  | 78450   |
| Q921G7 | Electron tran  | 4157.4  | 4273.8   | 3779.6  | 4590.4  | 4256.3  |
| Q9JLJ2 | 4-trimethyla   | 51680   | 62948    | 75460   | 91195   | 80878   |
| P15105 | Glutamine sy   | 263680  | 221950   | 81331   | 590530  | 329670  |
| Q924L1 | LETM1 doma     | 399590  | 666650   | 917070  | 1007500 | 442250  |
| Q9D338 | 39S ribosoma   | 56316   | 43491    | 85473   | 78028   | 3850.1  |
| P03899 | NADH-ubiqui    | 300290  | 212180   | 1068800 | 1212100 | 53956   |
| Q91YP2 | Neurolysin, r  | 137300  | 118540   | 82334   | 60032   | 83369   |
| Q78YY6 | DnaJ homolo    | 82598   | 63211    | 110190  | 133030  | 74143   |
| Q9WV96 | Mitochondri    | 259160  | 165270   | 234000  | 268470  | 173340  |
| Q8R127 | Saccharopine   | 9057.7  | 1102.5   | 3795.8  | 5421    | 57238   |
| P36552 | Oxygen-depe    | 31384   | 39380    | 107110  | 88178   | 8888.3  |
| Q91WK5 | Glycine cleav  | 115450  | 110260   | 661160  | 531770  | 47387   |
| Q9QZ23 | NFU1 iron-su   | 1142500 | 1248700  | 1078900 | 843730  | 423010  |
| Q9DBG6 | Dolichyl-diph  | 4355.5  | 2535.9   | 6511.2  | 6021.2  | 59897   |
| O88741 | Ganglioside-i  | 3176900 | 3017400  | 2756000 | 2455300 | 2566600 |
| Q99N93 | 39S ribosoma   | 6872.9  | 11522    | 6217.5  | 3966.1  | 35219   |
| Q80X85 | 28S ribosoma   | 302740  | 338920   | 329590  | 311780  | 150410  |
| Q5U458 | DnaJ homolo    | 499040  | 661460   | 1099100 | 820750  | 187510  |
| P62908 | 40S ribosoma   | 74209   | 49671    | 72355   | 76267   | 25724   |
| Q8BGH2 | Sorting and a  | 5824.8  | 4793.4   | 6929.8  | 2744.8  | 75671   |
| P62911 | 60S ribosoma   | 6512.7  | 6110.9   | 25988   | 108990  | 12272   |
| Q9D0G0 | 28S ribosoma   | 3755.5  | 7185.2   | 139360  | 69660   | 16468   |
| P11352 | Glutathione j  | 102280  | 31386    | 110750  | 131530  | 100630  |
| A6H611 | Mitochondri    | 96190   | 111660   | 178760  | 175960  | 69480   |
| Q8BGX2 | Mitochondri    | 313950  | 355870   | 329840  | 284510  | 259840  |
| Q9QYR9 | Acyl-coenzyn   | 8543.9  | 132540   | 17976   | 23634   | 38204   |
| P45878 | Peptidyl-prol  | 150820  | 144160   | 186340  | 174320  | 133160  |
| Q920A7 | AFG3-like pro  | 7981.5  | 2973     | 68856   | 12770   | 9444.3  |
| Q8JZU2 | Tricarboxylat  | 919710  | 950550   | 1186700 | 1016700 | 285040  |
| Q8R3Q6 | Coiled-coil de | 126190  | 114040   | 261600  | 270870  | 110650  |
| P52825 | Carnitine O-p  | 395320  | 677240   | 200260  | 207740  | 193930  |
| Q8R0F8 | Acylpyruvase   | 26574   | 24331    | 73781   | 63010   | 416610  |
| Q9ESW4 | Acylglycerol l | 2638000 | 2425300  | 2462300 | 2359300 | 1537100 |

|        |                |         |         |         |         |         |
|--------|----------------|---------|---------|---------|---------|---------|
| Q8BYM8 | Probable cys   | 29608   | 57189   | 55278   | 109050  | 80074   |
| Q8BGB8 | Ubiquinone l   | 96839   | 159170  | 141290  | 155140  | 119050  |
| P23506 | Protein-L-iso  | 14307   | 28705   | 4841.2  | 2828.9  | 20023   |
| Q8R404 | MICOS comp     | 1582.3  | 3346.9  | 5495.5  | 26098   | 1128.4  |
| Q99JI6 | Ras-related p  | 121240  | 45708   | 5693.6  | 23707   | 350.03  |
| Q9CQ91 | NADH dehyd     | 373280  | 357870  | 884340  | 970080  | 584080  |
| Q9DCV4 | Regulator of   | 506670  | 456260  | 407490  | 335020  | 329760  |
| Q9D6M3 | Mitochondria   | 2513300 | 3143300 | 5695200 | 6181500 | 3615200 |
| Q9ERD7 | Tubulin beta   | 165370  | 164180  | 64691   | 90549   | 82614   |
| Q9DBL1 | Short/branch   | 446210  | 498530  | 479430  | 331630  | 309210  |
| Q9WTP7 | GTP:AMP ph     | 1567500 | 1507100 | 1402300 | 1124200 | 1169600 |
| Q99N84 | 28S ribosoma   | 90513   | 65033   | 40134   | 25225   | 27042   |
| P97493 | Thioredoxin,   | 644740  | 635150  | 922440  | 911640  | 470900  |
| Q9ER88 | 28S ribosoma   | 117840  | 681220  | 177660  | 118250  | 641610  |
| Q9D1H8 | 39S ribosoma   | 40486   | 74897   | 294640  | 695870  | 37684   |
| P35564 | Calnexin OS=   | 155210  | 320930  | 181400  | 127420  | 75744   |
| P56391 | Cytochrome     | 59451   | 121890  | 5118000 | 4487200 | 29959   |
| O88396 | GrpE protein   | 63678   | 58019   | 63382   | 43709   | 24107   |
| P38060 | Hydroxymeth    | 368610  | 371080  | 154930  | 171160  | 154330  |
| Q8BG51 | Mitochondria   | 445740  | 492900  | 461360  | 474560  | 451990  |
| Q9CY28 | GTP-binding    | 32662   | 19792   | 74502   | 7334    | 75294   |
| O35459 | Delta(3,5)-De  | 205170  | 287600  | 233730  | 203710  | 25945   |
| P47791 | Glutathione r  | 221830  | 133540  | 85169   | 139650  | 99507   |
| Q9CQL5 | 39S ribosoma   | 29085   | 18551   | 20064   | 2585    | 9351.1  |
| P63030 | Mitochondria   | 92914   | 31963   | 32669   | 177380  | 142830  |
| Q9D8W7 | OCIA domain    | 17721   | 11219   | 13001   | 41773   | 4933.5  |
| O08709 | Peroxioredoxi  | 7432.6  | 22838   | 2201.4  | 6936.2  | 13242   |
| Q9D2R8 | 28S ribosoma   | 97556   | 90507   | 45820   | 74374   | 39515   |
| Q99L04 | Dehydrogena    | 20692   | 13026   | 185410  | 145970  | 6336.7  |
| O88441 | Metaxin-2 O    | 28415   | 22978   | 23188   | 32728   | 13615   |
| Q9DBL7 | Bifunctional   | 4156.5  | 21567   | 22055   | 4096.1  | 11238   |
| P52196 | Thiosulfate s  | 2748800 | 2249500 | 1725400 | 1330200 | 807740  |
| Q9CWB7 | Glutaredoxin   | 5945.5  | 3379.7  | 5446.4  | 1987.4  | 477.55  |
| Q99M87 | DnaJ homolo    | 1395100 | 1523300 | 1552500 | 1270700 | 1221300 |
| O35683 | NADH dehyd     | 129060  | 28876   | 25569   | 41451   | 39651   |
| Q8BGF9 | Solute carrier | 13716   | 18637   | 23227   | 30429   | 30460   |
| Q9D880 | Mitochondria   | 898420  | 1739100 | 910260  | 1070800 | 941190  |
| Q9D2G2 | Dihydrolipoy   | 1974700 | 1681400 | 1222300 | 1088900 | 2598400 |
| P62270 | 40S ribosoma   | 52476   | 31139   | 30173   | 104440  | 19884   |
| Q9CXW2 | 28S ribosoma   | 170400  | 161160  | 127080  | 120390  | 80103   |
| Q80YD1 | ATP-depende    | 453160  | 280270  | 196840  | 170220  | 180470  |
| Q8JZN7 | Mitochondria   | 4176.9  | 3813.7  | 97368   | 66199   | 6097    |

|        |                |         |         |         |         |         |
|--------|----------------|---------|---------|---------|---------|---------|
| A2APY7 | Arginine-hyd   | 119410  | 123690  | 216470  | 206970  | 71621   |
| Q9R112 | Sulfide:quinc  | 59893   | 28552   | 3176.9  | 27196   | 24844   |
| Q64105 | Sepiapterin r  | 46870   | 64361   | 33755   | 35092   | 67086   |
| Q8K1J6 | CCA tRNA nu    | 54712   | 52527   | 15892   | 48505   | 12545   |
| P63038 | 60 kDa heat :  | 3256800 | 9811000 | 6141900 | 2750000 | 6113800 |
| Q8K4F5 | Protein ABHE   | 44377   | 129830  | 260570  | 64007   | 161410  |
| Q8K370 | Acyl-CoA def   | 7333.3  | 56088   | 61813   | 48504   | 54579   |
| Q9D0L7 | Armadillo rep  | 191240  | 330240  | 264320  | 347000  | 209160  |
| Q9JKL4 | NADH dehyd     | 182460  | 194340  | 268960  | 260200  | 187500  |
| P51881 | ADP/ATP tra    | 5728800 | 4444000 | 7967900 | 6807100 | 2678600 |
| Q8BJZ4 | 28S ribosoma   | 1674.3  | 16334   | 2519.1  | 6719.3  | 605.84  |
| P14824 | Annexin A6 C   | 4783.4  | 4864.6  | 45537   | 9095.4  | 4820.1  |
| Q9CPY7 | Cytosol amin   | 82162   | 76292   | 219040  | 147570  | 103590  |
| Q9D7N3 | 28S ribosoma   | 190570  | 344830  | 257790  | 225570  | 142620  |
| Q9CYR0 | Single-strand  | 7981.3  | 12733   | 5887.1  | 15118   | 20333   |
| Q8VDP6 | CDP-diacylgl   | 106710  | 116950  | 74613   | 61317   | 165640  |
| Q60649 | Caseinolytic p | 69557   | 110610  | 107180  | 76917   | 69456   |
| Q9D0M3 | Cytochrome     | 3444300 | 4131800 | 2807500 | 2093800 | 2799300 |
| P22315 | Ferrochelata   | 14000   | 11380   | 38849   | 74061   | 20943   |
| P13707 | Glycerol-3-ph  | 3448.5  | 3756    | 25827   | 22082   | 21007   |
| Q8VCF0 | Mitochondria   | 6775.6  | 11249   | 26277   | 7032.5  | 14554   |
| Q8K2M0 | 39S ribosoma   | 148630  | 139310  | 111240  | 113710  | 87464   |
| O70579 | Peroxisomal    | 93011   | 92277   | 111620  | 84555   | 169710  |
| P50136 | 2-oxoisovale   | 298650  | 572510  | 352110  | 326740  | 380830  |
| Q66GT5 | Phosphatidyl   | 11049   | 727.48  | 14274   | 1300.9  | 11067   |
| P46638 | Ras-related p  | 253370  | 196420  | 144030  | 156610  | 127210  |
| O35857 | Mitochondria   | 1171200 | 1160500 | 1009400 | 1099800 | 1149600 |
| P62874 | Guanine nucl   | 27996   | 166740  | 78046   | 122620  | 124470  |
| P70349 | Histidine tria | 1160900 | 61889   | 54874   | 3647900 | 1015500 |
| P62830 | 60S ribosoma   | 4341.7  | 19566   | 23078   | 90138   | 17731   |
| Q8BTE5 | Protein CEBP   | 5270.8  | 15516   | 7671.8  | 12008   | 642.49  |
| P97742 | Carnitine O-p  | 3265.8  | 3393.1  | 4828    | 26562   | 28998   |
| Q9D8B4 | NADH dehyd     | 170270  | 420440  | 353240  | 177250  | 79839   |
| Q99L13 | 3-hydroxyiso   | 327640  | 401380  | 377720  | 332320  | 487160  |
| Q8K411 | Presequence    | 211120  | 364080  | 305110  | 172530  | 191780  |
| Q8BFP9 | [Pyruvate de   | 589900  | 717780  | 762210  | 506660  | 845460  |
| P53026 | 60S ribosoma   | 25881   | 18188   | 19789   | 11158   | 17364   |
| Q9CZP5 | Mitochondria   | 143850  | 113160  | 85262   | 29767   | 198530  |
| Q8BWF0 | Succinate-se   | 1181800 | 1467600 | 1880300 | 1497100 | 1416700 |
| Q8R3F5 | Malonyl-CoA    | 50034   | 58776   | 22139   | 9616.8  | 26136   |
| P61089 | Ubiquitin-cor  | 119640  | 106330  | 63953   | 115630  | 155590  |
| Q4VAE3 | Transmembr     | 2914700 | 2588900 | 2198700 | 2285100 | 2862500 |

|        |                       |         |         |         |         |         |
|--------|-----------------------|---------|---------|---------|---------|---------|
| Q71RI9 | Kynurenine--          | 209670  | 217760  | 149990  | 135780  | 145510  |
| Q14C51 | Pentatricope          | 125170  | 111820  | 177430  | 174280  | 77849   |
| Q3U2A8 | Valine--tRNA          | 196710  | 257190  | 192450  | 149780  | 168910  |
| Q9DB20 | ATP synthase          | 6549700 | 8174100 | 3398700 | 2934500 | 7473300 |
| Q8JZN5 | Acyl-CoA def          | 553570  | 568910  | 603740  | 530680  | 691010  |
| O55028 | [3-methyl-2- $\alpha$ | 38080   | 5279.6  | 51740   | 4332.4  | 54449   |
| O35943 | Frataxin, mit         | 250520  | 240460  | 263070  | 365500  | 173170  |
| Q91W43 | Glycine dehy          | 14433   | 69464   | 84223   | 2488    | 14171   |
| Q9CQZ5 | NADH dehyd            | 1754300 | 2588800 | 2759400 | 2694200 | 2775600 |
| Q61207 | Prosaposin C          | 8566.1  | 44459   | 228020  | 231060  | 16085   |
| P51150 | Ras-related p         | 55284   | 94156   | 11936   | 98575   | 106840  |
| Q924T2 | 28S ribosoma          | 210170  | 129230  | 114900  | 51388   | 71367   |
| P56382 | ATP synthase          | 126890  | 52172   | 81364   | 419960  | 193800  |
| Q9JKC6 | Cell cycle exi        | 5669900 | 5468800 | 5468600 | 5020700 | 5675400 |
| Q9CXI0 | 2-methoxy-6           | 89090   | 25928   | 46938   | 38956   | 26747   |
| Q8BKY8 | Transcriptior         | 47228   | 70934   | 171820  | 177280  | 61671   |
| Q8BK30 | NADH dehyd            | 131120  | 112270  | 485170  | 421520  | 138190  |
| Q3TIU4 | 2',5'-phosph          | 33927   | 101960  | 64872   | 45674   | 47223   |
| O35129 | Prohibitin-2 (        | 2239100 | 2195900 | 1137000 | 1124400 | 1140000 |
| Q9D1R1 | Complex I as          | 78188   | 85610   | 68666   | 76137   | 68846   |
| Q9QYA2 | Mitochondria          | 622630  | 785030  | 622610  | 447610  | 392020  |
| Q3UFY8 | Mitochondria          | 23415   | 35334   | 51431   | 34529   | 16240   |
| Q91ZA3 | Propionyl-Co          | 458340  | 515540  | 443230  | 206000  | 595960  |
| Q99NB1 | Acetyl-coenz          | 223620  | 50081   | 114190  | 138540  | 55360   |
| Q9CZX8 | 40S ribosoma          | 31228   | 32230   | 38508   | 93286   | 23499   |
| Q60930 | Voltage-depe          | 3695900 | 4284300 | 5307200 | 4222700 | 5013900 |
| Q8CFI5 | Probable pro          | 9480.3  | 22700   | 19080   | 6642.5  | 56940   |
| Q60597 | 2-oxoglutar           | 855540  | 1152600 | 1256100 | 788690  | 997980  |
| Q9CQY6 | Ubiquinol-cy          | 145940  | 187160  | 257450  | 186330  | 183190  |
| Q9DCZ4 | MICOS comp            | 4582800 | 3932700 | 5603300 | 5491700 | 4068400 |
| Q9JHI5 | Isovaleryl-Co         | 34888   | 57636   | 82998   | 124690  | 22240   |
| Q91YP0 | L-2-hydroxyg          | 257840  | 211850  | 202580  | 190990  | 449700  |
| Q9D1P0 | 39S ribosoma          | 71842   | 91122   | 57990   | 26232   | 7999.9  |
| P09103 | Protein disul         | 131850  | 238710  | 142940  | 32417   | 36070   |
| Q99LX0 | Protein DJ-1          | 100900  | 152690  | 69460   | 22451   | 172170  |
| Q9D6S7 | Ribosome-re           | 340730  | 272010  | 405790  | 318290  | 356780  |
| Q99N94 | 39S ribosoma          | 45356   | 279350  | 85489   | 183600  | 171950  |
| Q63844 | Mitogen-acti          | 58780   | 50442   | 20864   | 7354.4  | 62785   |
| Q91VC9 | Growth horn           | 12289   | 10075   | 3973.8  | 34116   | 1442.8  |
| P47740 | Fatty aldehyc         | 249040  | 241100  | 221500  | 168840  | 306000  |
| Q3U6U5 | Putative GTP          | 19963   | 29976   | 17771   | 5508    | 13165   |
| Q8QZS1 | 3-hydroxyiso          | 511840  | 522120  | 596160  | 329880  | 427280  |

|        |                |          |          |          |          |          |
|--------|----------------|----------|----------|----------|----------|----------|
| Q924D0 | Reticulon-4-i  | 55814    | 37544    | 48590    | 142190   | 68635    |
| P07901 | Heat shock p   | 63365    | 80187    | 98679    | 103560   | 97814    |
| Q922G0 | Solute carri   | 24617    | 6384     | 48584    | 69514    | 2586.3   |
| Q6PE15 | Mycophenoli    | 532860   | 527290   | 580200   | 596900   | 493570   |
| P63037 | DnaJ homolo    | 7680.4   | 21696    | 1062.8   | 79660    | 15096    |
| Q9DCB8 | Iron-sulfur cl | 581760   | 970910   | 1286100  | 838680   | 626030   |
| Q8BWM0 | Prostaglandi   | 46478    | 117240   | 164660   | 110690   | 575060   |
| Q9CZW5 | Mitochondri    | 43414    | 41916    | 25954    | 66809    | 8123.8   |
| Q9JL8  | Serine--tRNA   | 293810   | 202950   | 177990   | 194990   | 108080   |
| Q91VT4 | Carbonyl red   | 81284    | 97127    | 151970   | 186390   | 88470    |
| Q99N85 | 28S ribosom    | 55658    | 102390   | 143780   | 159860   | 45871    |
| Q9CR61 | NADH dehyd     | 395970   | 467510   | 708450   | 534750   | 655690   |
| O88967 | ATP-depende    | 1561200  | 1272600  | 1948700  | 1336300  | 1174700  |
| Q9CQX2 | Cytochrome     | 472860   | 352770   | 446930   | 436050   | 915910   |
| Q9D1I5 | Methylmalor    | 131260   | 196900   | 223070   | 81446    | 284860   |
| Q9CQN6 | Transmembr     | 65986    | 18963    | 127180   | 143820   | 69849    |
| Q99MN9 | Propionyl-Co   | 1097200  | 1163600  | 1461900  | 1242400  | 881760   |
| Q8CC88 | von Willebra   | 129580   | 94423    | 232860   | 37083    | 40187    |
| Q8K354 | Carbonyl red   | 13515    | 12728    | 20321    | 24577    | 14709    |
| Q3TBW2 | 39S ribosom    | 6690.2   | 3945.3   | 41703    | 81219    | 12395    |
| Q922Q4 | Pyrroline-5-c  | 192150   | 492170   | 161500   | 161200   | 146260   |
| Q8VEG4 | Exonuclease    | 56673    | 50544    | 59387    | 102340   | 116740   |
| P00405 | Cytochrome     | 33188000 | 33212000 | 22970000 | 20504000 | 25984000 |
| Q9R0X4 | Acyl-coenzyn   | 238410   | 698540   | 226400   | 147340   | 509520   |
| P48962 | ADP/ATP tra    | 1698600  | 1728100  | 18643000 | 20458000 | 1342300  |
| Q9CPR5 | 39S ribosom    | 409730   | 71119    | 524040   | 288890   | 246740   |
| Q9CQH3 | NADH dehyd     | 1865500  | 1858400  | 2441100  | 58244    | 2056800  |
| P58252 | Elongation fa  | 172240   | 135880   | 17272    | 32326    | 50209    |
| Q9CWZ7 | Gamma-solu     | 68900    | 17757    | 16181    | 50174    | 30026    |
| Q566J8 | Atypical kina  | 22667    | 35120    | 139050   | 36700    | 14719    |
| Q9WV85 | Nucleoside d   | 3564     | 5714.3   | 78282    | 169500   | 24131    |
| P56213 | FAD-linked si  | 71447    | 48932    | 60394    | 70673    | 97286    |
| Q8CGK3 | Lon protease   | 698570   | 666020   | 690860   | 577060   | 576450   |
| Q8BSF4 | Phosphatidyl   | 31243    | 24013    | 9281.6   | 15243    | 13611    |
| P20029 | 78 kDa gluco   | 304230   | 120340   | 108950   | 198220   | 75886    |
| Q8JZQ2 | AFG3-like pro  | 300000   | 341460   | 201570   | 210100   | 357770   |
| Q9D6K5 | Synaptojanin   | 304520   | 334960   | 291100   | 252640   | 447380   |
| P62073 | Mitochondri    | 23537    | 63949    | 194900   | 49692    | 138680   |
| Q9CQP0 | 39S ribosom    | 36020    | 55941    | 86626    | 89281    | 16337    |
| Q8R3K3 | Pentatricope   | 76723    | 43735    | 54814    | 25107    | 76732    |
| Q9CPW2 | Ferredoxin-2   | 82207    | 141810   | 184150   | 154060   | 139470   |
| Q3UMR5 | Calcium unip   | 134270   | 128010   | 125530   | 139820   | 122420   |

|        |                |          |          |          |          |         |
|--------|----------------|----------|----------|----------|----------|---------|
| Q8VD26 | Transmembr     | 136760   | 164090   | 55058    | 65673    | 96403   |
| Q9D924 | Iron-sulfur cl | 198550   | 229830   | 322510   | 677030   | 126700  |
| Q64433 | 10 kDa heat s  | 11147000 | 11642000 | 11193000 | 12981000 | 8755200 |
| Q8K2C6 | NAD-depend     | 118760   | 152540   | 221100   | 184380   | 163020  |
| Q8BK08 | Transmembr     | 213690   | 78794    | 120030   | 1288200  | 235180  |
| Q8K0D5 | Elongation fa  | 79815    | 56657    | 88329    | 56440    | 35062   |
| Q80UU9 | Membrane-a     | 65039    | 74026    | 60415    | 80386    | 43263   |
| P56394 | Cytochrome     | 15951    | 11832    | 94398    | 153560   | 25697   |
| Q9EP89 | Serine beta-l  | 106880   | 81719    | 62865    | 89037    | 115770  |
| Q8BH86 | D-glutamate    | 74074    | 10794    | 12809    | 14430    | 42317   |
| P56395 | Cytochrome     | 140340   | 129860   | 125880   | 164370   | 114690  |
| P35278 | Ras-related p  | 201810   | 259560   | 201480   | 110450   | 141940  |
| Q9D6J6 | NADH dehyd     | 1901900  | 2061600  | 1572500  | 1434500  | 2505200 |
| Q921S7 | 39S ribosoma   | 64269    | 246820   | 214480   | 122900   | 108740  |
| P16332 | Methylmalor    | 311610   | 253670   | 259090   | 344180   | 430880  |
| P52760 | 2-iminobutar   | 12717    | 108600   | 43571    | 76783    | 19197   |
| Q8BMS4 | Ubiquinone k   | 154180   | 210330   | 208780   | 122900   | 194500  |
| Q80XN0 | D-beta-hydr    | 3081500  | 5074400  | 1816500  | 1380700  | 1901300 |
| P48771 | Cytochrome     | 6123900  | 6317200  | 3630100  | 3916000  | 6334700 |
| P47802 | Metaxin-1 O'   | 93998    | 15938    | 265980   | 1042600  | 174940  |
| Q59J78 | Mimitin, mit   | 70486    | 54115    | 15595    | 48896    | 50245   |
| Q9QZD8 | Mitochondria   | 73252    | 73287    | 205370   | 206720   | 97811   |
| P59017 | Bcl-2-like pro | 66130    | 27422    | 10449    | 37674    | 16895   |
| Q8BH95 | Enoyl-CoA hy   | 954630   | 948160   | 1395400  | 1124900  | 889870  |
| Q9WV98 | Mitochondria   | 458600   | 309650   | 467280   | 508340   | 394120  |
| Q8BGT5 | Alanine amin   | 41040    | 50407    | 109610   | 70727    | 19197   |
| P03911 | NADH-ubiqui    | 203490   | 200780   | 328310   | 287450   | 126730  |
| Q8BHF7 | CDP-diacylgl   | 223930   | 264380   | 194510   | 174320   | 168820  |
| Q9D3P8 | Plasminogen    | 544980   | 1566600  | 207420   | 279110   | 636720  |
| P47199 | Quinone oxid   | 19976    | 12927    | 5123.1   | 7960.5   | 11611   |
| Q9JIY5 | Serine protea  | 201300   | 133600   | 199990   | 181140   | 208590  |
| Q9D773 | 39S ribosoma   | 97428    | 89219    | 69896    | 195320   | 51853   |
| Q8BKZ9 | Pyruvate deh   | 544590   | 684460   | 847040   | 548120   | 755370  |
| Q9CQA3 | Succinate de   | 1619900  | 1551000  | 723270   | 895370   | 550240  |
| Q5IRJ6 | Zinc transpor  | 204900   | 164790   | 223660   | 200220   | 221390  |
| Q9QUJ7 | Long-chain-fa  | 2316.3   | 1306.8   | 3074.3   | 15502    | 2817.3  |
| O35114 | Lysosome me    | 6988.9   | 3667.7   | 39698    | 7977.7   | 4945.3  |
| Q9Z0X1 | Apoptosis-in   | 1047000  | 965070   | 731120   | 272340   | 612910  |
| Q9CQ62 | 2,4-dienoyl-C  | 154750   | 233800   | 386790   | 414230   | 123050  |
| Q99KE1 | NAD-depend     | 355590   | 367310   | 382940   | 387870   | 286780  |
| Q9DA03 | Complex III a  | 185400   | 178310   | 187180   | 143970   | 162380  |
| Q810S1 | Calcium unip   | 42881    | 15818    | 27860    | 32539    | 13738   |

|        |                |         |         |         |         |         |
|--------|----------------|---------|---------|---------|---------|---------|
| Q9D273 | Cob(I)yrinic a | 201620  | 231950  | 196630  | 173730  | 203360  |
| Q61941 | NAD(P) trans   | 287520  | 164340  | 197390  | 327190  | 237630  |
| Q3URS9 | Coiled-coil dc | 111130  | 105170  | 30462   | 25437   | 60364   |
| Q9CRB9 | MICOS comp     | 948950  | 718440  | 1128900 | 1262500 | 1070000 |
| Q9D7J4 | Cytochrome     | 106510  | 151410  | 144380  | 239060  | 121100  |
| Q9DAM5 | Mitochondria   | 40593   | 57060   | 22293   | 56296   | 59301   |
| Q9D7B6 | Isobutyryl-Cc  | 163400  | 205800  | 382990  | 341950  | 99856   |
| Q9WV54 | Acid ceramid   | 99585   | 77802   | 14579   | 11313   | 17322   |
| Q9CPV4 | Glyoxalase di  | 20557   | 66749   | 81058   | 21021   | 96416   |
| Q8C7H1 | Methylmalor    | 100260  | 248020  | 78490   | 254660  | 122690  |
| Q8VED8 | Mitochondria   | 18813   | 11223   | 5860    | 130790  | 45514   |
| Q922H2 | [Pyruvate de   | 24294   | 9017.6  | 7675    | 54148   | 16914   |
| Q5M8N4 | Epimerase fa   | 16133   | 215080  | 5667.7  | 16357   | 19683   |
| Q99JR1 | Sideroflexin-  | 2116800 | 2069100 | 2388200 | 2010300 | 2063300 |
| Q99J47 | Dehydrogena    | 143410  | 23957   | 37595   | 19756   | 81952   |
| Q9CQJ8 | NADH dehyd     | 857010  | 1144600 | 734940  | 654450  | 1171500 |
| Q9CXT8 | Mitochondria   | 41478   | 100450  | 49172   | 46837   | 38886   |
| Q8CFA2 | Aminomethy     | 80977   | 84961   | 80744   | 93168   | 13455   |
| P00416 | Cytochrome     | 6163.3  | 2744.5  | 2597.1  | 41473   | 17462   |
| Q9WTM5 | RuvB-like 2 C  | 515890  | 615760  | 761940  | 613460  | 652430  |
| Q8BH55 | Threonine sy   | 273130  | 193810  | 293970  | 203840  | 189980  |
| P18572 | Basigin OS=M   | 4172.8  | 8751.8  | 11972   | 86719   | 4313.4  |
| Q8CAK1 | Putative tran  | 278370  | 324200  | 269230  | 306900  | 261430  |
| Q8VDC0 | Probable leu   | 5763.5  | 39173   | 26519   | 19991   | 19148   |
| Q9CQ06 | 39S ribosoma   | 11042   | 75998   | 35271   | 108400  | 9295.7  |
| Q9DB25 | Dolichyl-pho   | 2210900 | 94569   | 2757100 | 114800  | 114190  |
| Q9DC70 | NADH dehyd     | 2929500 | 3423600 | 3595400 | 3111600 | 3078100 |
| Q9QX60 | Deoxyguano     | 205790  | 234340  | 89830   | 52817   | 132020  |
| O70325 | Phospholipid   | 151590  | 166160  | 214550  | 294270  | 261250  |
| Q06185 | ATP synthase   | 5388600 | 4967400 | 5976800 | 7448700 | 5504600 |
| Q8CI78 | Required for   | 154310  | 234430  | 67046   | 165360  | 245410  |
| Q9DB41 | Mitochondria   | 509670  | 857320  | 1211900 | 2238700 | 470530  |
| P58281 | Dynamin-like   | 1072500 | 1035100 | 502050  | 620060  | 1591800 |
| Q8BIP0 | Aspartate--tf  | 61165   | 63082   | 65193   | 49485   | 37253   |
| Q8K1M6 | Dynamin-1-li   | 317320  | 243310  | 134040  | 24282   | 217560  |
| P32020 | Non-specific   | 16569   | 8665.1  | 15992   | 126000  | 28799   |
| Q64521 | Glycerol-3-ph  | 3032000 | 3263500 | 188090  | 1413800 | 3405800 |
| Q9DCM2 | Glutathione !  | 72888   | 66225   | 94953   | 76092   | 29773   |
| Q9CZN8 | Glutamyl-tRN   | 29854   | 36711   | 82094   | 15506   | 3263.1  |
| P51174 | Long-chain sj  | 997870  | 1611900 | 2115100 | 1825700 | 1155600 |
| P99024 | Tubulin beta-  | 1528800 | 185840  | 341370  | 296290  | 966300  |
| Q8R104 | NAD-depend     | 13584   | 73693   | 68140   | 83226   | 68842   |

|        |                |         |         |         |         |         |
|--------|----------------|---------|---------|---------|---------|---------|
| Q9D5T0 | ATPase famil   | 130330  | 117420  | 61486   | 98382   | 68854   |
| Q9CRD2 | ER membran     | 28106   | 30435   | 48772   | 31940   | 12134   |
| Q499X9 | Methionine--   | 60107   | 38846   | 69497   | 59677   | 6476.6  |
| Q8VDD5 | Myosin-9 OS    | 2309.4  | 7605.9  | 2471.1  | 4458.7  | 7373.1  |
| Q9CWD8 | Iron-sulfur pr | 44259   | 112440  | 23944   | 61365   | 86423   |
| Q60931 | Voltage-depe   | 5178000 | 4648500 | 4834100 | 4448600 | 3790900 |
| Q9D1E8 | 1-acyl-sn-gly  | 2404.3  | 6467.9  | 1816.5  | 12412   | 1589    |
| P99028 | Cytochrome     | 983430  | 949570  | 1813800 | 81875   | 856240  |
| P03930 | ATP synthase   | 2890700 | 3216400 | 3198800 | 4947500 | 3381400 |
| Q8C0K5 | Graves disea   | 16941   | 13847   | 46459   | 80897   | 33038   |
| Q8BGD8 | Cytochrome     | 15565   | 5472.9  | 91814   | 69500   | 22019   |
| Q8BK72 | 28S ribosoma   | 120590  | 892880  | 41695   | 57860   | 304180  |
| Q8CBY0 | Glutamyl-tRN   | 6902.4  | 21221   | 5721.6  | 17401   | 24408   |
| Q5SUC9 | Protein SCO1   | 67304   | 138340  | 108130  | 82749   | 38168   |
| Q80V03 | Uncharacteri   | 30249   | 31156   | 29234   | 18710   | 29638   |
| Q8R4N0 | Citrate lyase  | 562700  | 591870  | 477490  | 461990  | 454040  |
| Q9CWU6 | Ubiquinol-cy   | 330380  | 328440  | 217720  | 264950  | 328570  |
| P80313 | T-complex pr   | 7928.6  | 5928.1  | 17230   | 18152   | 4584.1  |
| Q9DCN2 | NADH-cytochl   | 136950  | 321630  | 108010  | 31322   | 159910  |
| Q80U63 | Mitofusin-2 (  | 328260  | 281750  | 211700  | 223390  | 300740  |
| P62245 | 40S ribosoma   | 22767   | 24015   | 28212   | 101040  | 40821   |
| Q9CQQ7 | ATP synthase   | 5682500 | 6030500 | 8555400 | 9546400 | 7441600 |
| P68254 | 14-3-3 protei  | 122320  | 83451   | 63633   | 35845   | 44425   |
| P62717 | 60S ribosoma   | 5091.5  | 3391.9  | 8455.8  | 258960  | 8450.9  |
| Q8K1R3 | Polyribonuck   | 15946   | 74312   | 12500   | 36032   | 27625   |
| O08807 | Peroxiredoxin  | 72745   | 156070  | 64320   | 31453   | 95522   |
| Q62186 | Translocon-a   | 9269.6  | 26084   | 31805   | 15210   | 40076   |
| P97930 | Thymidylate    | 17635   | 16490   | 106230  | 10599   | 106150  |
| P62259 | 14-3-3 protei  | 333310  | 321050  | 125590  | 124190  | 257080  |
| Q9CZ83 | 39S ribosoma   | 513300  | 371020  | 303310  | 436280  | 446890  |
| Q3UV70 | [Pyruvate de   | 241310  | 284590  | 163400  | 248470  | 267840  |
| Q9CPX8 | Cytochrome     | 63203   | 3301.5  | 2231.8  | 17276   | 6559.2  |
| Q6PB66 | Leucine-rich   | 101600  | 1912800 | 977300  | 45732   | 943710  |
| B1AR13 | CDGSH iron-s   | 21823   | 22792   | 26518   | 20925   | 10628   |
| Q9WUR2 | Enoyl-CoA de   | 79947   | 124460  | 104780  | 34815   | 44762   |
| P62075 | Mitochondria   | 321000  | 566630  | 1109800 | 673880  | 477760  |
| Q9JLT4 | Thioredoxin i  | 10566   | 3015.5  | 7310.2  | 25441   | 2046    |
| Q6RUT7 | Protein CCSM   | 35434   | 54751   | 15993   | 17384   | 36891   |
| Q8BIJ6 | Isoleucine--tl | 1099400 | 1002200 | 906710  | 798600  | 911280  |
| Q8C163 | Nuclease EXC   | 935300  | 938870  | 1001100 | 736820  | 1121400 |
| Q9CPU4 | Microsomal ξ   | 4822.7  | 16868   | 160920  | 14551   | 12474   |
| Q8K2B3 | Succinate de   | 337440  | 228720  | 1675500 | 872780  | 745430  |



|        |                |         |         |          |          |         |
|--------|----------------|---------|---------|----------|----------|---------|
| O54734 | Dolichyl-diph  | 26020   | 77285   | 116700   | 10472    | 63202   |
| P23242 | Gap junction   | 33791   | 73752   | 28852    | 146530   | 84115   |
| Q9D1N9 | 39S ribosoma   | 247680  | 298760  | 69918    | 45619    | 170750  |
| P47934 | Carnitine O-a  | 236940  | 465130  | 365510   | 215270   | 218450  |
| Q60932 | Voltage-depe   | 9200300 | 7625000 | 13026000 | 12875000 | 8058400 |
| Q3V3R1 | Monofunctio    | 1590700 | 1592000 | 1521100  | 1259100  | 1719800 |
| Q6ZQI3 | Malectin OS=   | 4247.8  | 33935   | 6332.7   | 43712    | 44164   |
| Q9CQ85 | Mitochondria   | 623600  | 666190  | 590310   | 487830   | 590920  |
| Q9CR13 | Protein FMC:   | 2561.7  | 138910  | 1832.1   | 4971.8   | 56594   |
| Q99KB8 | Hydroxyacylg   | 110580  | 9646.5  | 251480   | 106350   | 99184   |
| Q9CZD3 | Glycine--tRN   | 858980  | 777880  | 674930   | 561760   | 697920  |
| Q3TC33 | Coiled-coil d  | 45004   | 33999   | 72140    | 16195    | 25990   |
| Q9DCS3 | Enoyl-[acyl-c  | 16077   | 6320.7  | 171990   | 131850   | 65839   |
| Q9WV84 | Nucleoside d   | 10523   | 8098.8  | 7539.5   | 63832    | 2345.9  |
| P24288 | Branched-cha   | 541760  | 517920  | 518210   | 504200   | 449600  |
| Q91V12 | Cytosolic acy  | 145410  | 214980  | 162160   | 418600   | 142560  |
| Q99LP6 | GrpE protein   | 66590   | 955340  | 23288    | 552910   | 413080  |
| Q2TPA8 | Hydroxysterc   | 857.11  | 2680.7  | 1685.5   | 19048    | 4166.9  |
| P11499 | Heat shock p   | 68144   | 28495   | 6820.5   | 15826    | 1278.6  |
| P08113 | Endoplasmic    | 14826   | 61218   | 2827.4   | 7504.4   | 43401   |
| Q9Z2I0 | Mitochondria   | 2054300 | 1900600 | 1098400  | 737260   | 1945600 |
| Q791V5 | Mitochondria   | 663540  | 574260  | 642070   | 489270   | 658030  |
| Q5SV80 | Unconventio    | 91062   | 206310  | 258130   | 157240   | 65281   |
| Q9CQ75 | NADH dehyd     | 5935800 | 5692600 | 6378900  | 6455100  | 7285300 |
| PODJF2 | Protein PET1   | 61014   | 85740   | 3529     | 91481    | 100310  |
| P35700 | Peroxiredoxin  | 34722   | 36606   | 17724    | 8901.5   | 2853.9  |
| Q8R2Y8 | Peptidyl-tRN   | 185730  | 257320  | 10504    | 38354    | 106410  |
| P63321 | Ras-related p  | 57349   | 68389   | 26225    | 47437    | 16878   |
| P63276 | 40S ribosoma   | 8597.9  | 37256   | 40409    | 14357    | 3147.3  |
| Q9CZB0 | Succinate de   | 24553   | 17478   | 180560   | 96836    | 26414   |
| Q925N0 | Sideroflexin-  | 1162800 | 1012800 | 1090200  | 1303300  | 807610  |
| Q9Z2Z6 | Mitochondria   | 6763.7  | 13823   | 16479    | 6186.1   | 8554.8  |
| Q3ULF4 | Paraplegin O   | 9415.8  | 18852   | 56240    | 28893    | 13605   |
| Q3UN90 | LYR motif-co   | 69720   | 74578   | 47319    | 31681    | 58770   |
| Q5ND52 | rRNA methyl    | 11870   | 25050   | 6200.9   | 21685    | 3456    |
| Q9DC61 | Mitochondria   | 93234   | 67778   | 69890    | 1444.3   | 47531   |
| Q8VBT0 | Thioredoxin-   | 41335   | 28429   | 69851    | 203690   | 14500   |
| Q8R0N6 | Hydroxyacid-   | 23098   | 207800  | 23629    | 28290    | 39883   |
| Q8K3A0 | Iron-sulfur cl | 51294   | 67774   | 36452    | 55026    | 37974   |
| Q99N95 | 39S ribosoma   | 9804.1  | 61920   | 75802    | 56649    | 23124   |
| Q9QXX4 | Calcium-bind   | 33918   | 16065   | 82701    | 12512    | 17207   |
| Q9D1I2 | Caspase recr   | 25048   | 41771   | 20573    | 21579    | 26636   |

|        |                |          |         |          |          |          |
|--------|----------------|----------|---------|----------|----------|----------|
| P42125 | Enoyl-CoA de   | 719020   | 1007100 | 1079200  | 790560   | 663780   |
| Q920E5 | Farnesyl pyr   | 39511    | 36996   | 19709    | 1184.8   | 271.64   |
| O35465 | Peptidyl-prol  | 128290   | 711950  | 202080   | 178500   | 443750   |
| Q8BHE8 | m-AAA prote    | 286290   | 307060  | 98252    | 185370   | 186840   |
| Q8VCX5 | Calcium upta   | 158980   | 174970  | 128900   | 92104    | 169410   |
| Q3TL44 | NLR family m   | 39102    | 51283   | 51652    | 38743    | 63702    |
| Q501J2 | Protein FAM    | 7159.3   | 143340  | 13242    | 22722    | 51812    |
| Q9D710 | Thioredoxin-   | 62707    | 87515   | 82562    | 60256    | 57356    |
| Q8C5H8 | NAD kinase 2   | 195690   | 197000  | 289110   | 27804    | 197360   |
| P19783 | Cytochrome     | 10253000 | 9866200 | 10234000 | 9292100  | 10890000 |
| Q8VCE6 | 5'(3')-deoxyr  | 6795     | 27247   | 2911.9   | 6374.6   | 14534    |
| P20108 | Thioredoxin-   | 3954700  | 4135100 | 3965800  | 4534700  | 3496600  |
| P40142 | Transketolas   | 151040   | 169500  | 71983    | 47175    | 92122    |
| Q9DCM0 | Persulfide dic | 165680   | 435990  | 282120   | 145680   | 265440   |
| P19536 | Cytochrome     | 4230400  | 4757900 | 6504800  | 11182000 | 4670200  |
| P45952 | Medium-cha     | 192380   | 197270  | 155350   | 214640   | 102310   |
| Q60759 | Glutaryl-CoA   | 45215    | 58244   | 30090    | 18629    | 33674    |
| Q91V61 | Sideroflexin-  | 2650900  | 2361500 | 1081800  | 1289800  | 1472200  |
| Q9CXJ4 | ATP-binding    | 166980   | 111190  | 260790   | 80871    | 157820   |
| O08600 | Endonucleas    | 154680   | 284010  | 189660   | 183170   | 166570   |
| Q99M04 | Lipoyl syntha  | 8420.2   | 37877   | 211910   | 8099     | 44967    |
| Q8K215 | LYR motif-co   | 247710   | 285530  | 271800   | 260410   | 184520   |
| Q9ERS2 | NADH dehyd     | 4826400  | 4819600 | 4639100  | 4675500  | 5866600  |
| Q9Z1P6 | NADH dehyd     | 870630   | 651610  | 399740   | 1217700  | 674870   |
| Q8CGY8 | UDP-N-acety    | 16388    | 2097.3  | 8389.1   | 12429    | 6182     |
| Q91VM9 | Inorganic pyr  | 44803    | 127130  | 84583    | 89134    | 113810   |
| Q9QUI0 | Transforming   | 6132.6   | 2212.5  | 35134    | 30573    | 13053    |
| Q9D8T7 | SRA stem-loc   | 22984    | 11348   | 19981    | 10343    | 12386    |
| Q8BFR5 | Elongation fa  | 4114600  | 6635900 | 3866300  | 2609800  | 4838100  |
| Q9D8S9 | BolA-like pro  | 2600.4   | 87496   | 163890   | 76149    | 66964    |
| Q505D7 | Optic atroph   | 657900   | 647930  | 437000   | 500000   | 604460   |
| Q91VN4 | MICOS comp     | 571620   | 559470  | 406330   | 355790   | 629750   |
| Q8K1N1 | Calcium-inde   | 204560   | 177480  | 149870   | 74754    | 363470   |
| Q8BHN3 | Neutral alpha  | 24518    | 2127.2  | 10806    | 13300    | 8221.5   |
| Q9Z1Q2 | Protein ABHI   | 68099    | 123660  | 63415    | 304430   | 155640   |
| Q7TPD2 | Protein FAM    | 9536.7   | 338.05  | 42857    | 60423    | 3518.2   |
| Q9D173 | Mitochondria   | 6290.4   | 26196   | 7788.6   | 3998.2   | 4433.4   |

| P42 Mouse 2 | P42 Mouse 3 | P42 Mouse 4 | P7 Avg    | P42 Avg   | Log2 P42/P7 | BH         |
|-------------|-------------|-------------|-----------|-----------|-------------|------------|
| 58764000    | 41440000    | 43541000    | 14162250  | 52495000  | 1.89012953  | 7.9626E-09 |
| 21185       | 45112       | 45972       | 247897.5  | 33931     | -2.8690679  | 0.00322304 |
| 2753800     | 3807600     | 4072500     | 1267495   | 3497450   | 1.46432338  | 0.00381144 |
| 720750      | 1308700     | 1134900     | 22065.75  | 987872.5  | 5.48444416  | 0.00518097 |
| 1136800     | 1307300     | 1238600     | 139995.5  | 1195075   | 3.0936488   | 0.00518097 |
| 1614200     | 2930600     | 2934100     | 379557.5  | 2164775   | 2.51182672  | 0.00636496 |
| 1711800     | 1081500     | 1203500     | 3716250   | 1167467.5 | -1.6704652  | 0.00636496 |
| 10458000    | 11049000    | 11768000    | 4415425   | 11320750  | 1.35834533  | 0.01027603 |
| 4914500     | 3397100     | 3168400     | 1553177.5 | 4223700   | 1.44328465  | 0.01087834 |
| 916230      | 735170      | 772420      | 185438    | 814342.5  | 2.13469879  | 0.01087834 |
| 54490       | 58149       | 65465       | 256870    | 63046.75  | -2.0265445  | 0.01087834 |
| 2284400     | 4941200     | 3853200     | 1103835   | 3302550   | 1.58105587  | 0.01286904 |
| 198210      | 1185600     | 772730      | 60002.25  | 754422.5  | 3.6522842   | 0.01286904 |
| 19196000    | 29786000    | 37084000    | 13639975  | 26358750  | 0.95044096  | 0.01286904 |
| 418460      | 560460      | 449580      | 97139.25  | 497000    | 2.3551196   | 0.01286904 |
| 35629       | 62480       | 126080      | 236062.5  | 70487.25  | -1.7437347  | 0.01944745 |
| 154460      | 214030      | 303610      | 1296617.5 | 322827.5  | -2.0059176  | 0.01996669 |
| 190600      | 313720      | 272550      | 49156.5   | 231927.5  | 2.23821979  | 0.02413966 |
| 112160      | 9142.6      | 80480       | 220187.5  | 74291.65  | -1.5674606  | 0.02413966 |
| 461920      | 1158000     | 582730      | 152974.5  | 728472.5  | 2.25158333  | 0.02689273 |
| 3094100     | 2740600     | 2094200     | 977182.5  | 2421750   | 1.30935001  | 0.02749186 |
| 280230      | 170770      | 1265500     | 1800332.5 | 441663    | -2.0272455  | 0.02884323 |
| 2328.4      | 9150.2      | 16654       | 98919.25  | 8145.7    | -3.6021407  | 0.02884323 |
| 1518400     | 1724600     | 1429200     | 454012.5  | 1529600   | 1.7523505   | 0.02884323 |
| 2067200     | 3180700     | 2976500     | 1007649   | 2565850   | 1.34844365  | 0.02884323 |
| 276040      | 37152       | 121510      | 493250    | 157643    | -1.6456579  | 0.02884323 |
| 2841800     | 2379400     | 2952200     | 966580    | 2506775   | 1.37487146  | 0.02884323 |
| 44473       | 52303       | 50479       | 3665.025  | 48943.75  | 3.7392297   | 0.02884323 |
| 205410      | 190570      | 150950      | 47467.8   | 183007.5  | 1.94688168  | 0.02884323 |
| 67772       | 40008       | 62560       | 285937.5  | 58038     | -2.3006301  | 0.02884323 |
| 5138800     | 3626700     | 4057400     | 2161775   | 4349800   | 1.0087327   | 0.02884323 |
| 144820      | 194890      | 213210      | 43397.5   | 200807.5  | 2.21012931  | 0.02884323 |
| 19362000    | 17296000    | 19172000    | 24477000  | 16281750  | -0.588171   | 0.02892559 |
| 23514       | 33753       | 98846       | 260985    | 60925.25  | -2.0988547  | 0.02892559 |
| 35646       | 555160      | 1088100     | 41049.75  | 541401.5  | 3.72125354  | 0.02892559 |
| 959440      | 878840      | 902820      | 2246975   | 925372.5  | -1.2798779  | 0.02912625 |
| 29750       | 11405       | 16877       | 118042.5  | 17014.75  | -2.7944485  | 0.02975323 |
| 2047100     | 2575500     | 2610200     | 1016657.5 | 2385050   | 1.23018578  | 0.03087945 |
| 48881       | 22352       | 27188       | 130202.5  | 31331.5   | -2.0550714  | 0.03177409 |
| 216570      | 172020      | 170970      | 481742.5  | 180922.5  | -1.4128904  | 0.03400434 |
| 2014500     | 1708400     | 2685900     | 994820    | 2258775   | 1.18303315  | 0.03448059 |

|          |          |          |           |           |            |            |
|----------|----------|----------|-----------|-----------|------------|------------|
| 172950   | 10170    | 127660   | 398700    | 114747.5  | -1.7968409 | 0.03448059 |
| 1177400  | 4255700  | 2646700  | 983735    | 2573700   | 1.38750226 | 0.03493576 |
| 582450   | 577930   | 486410   | 205197.5  | 583955    | 1.50884404 | 0.03608195 |
| 2380100  | 5918000  | 5354900  | 1279992.5 | 3686600   | 1.52615553 | 0.03608195 |
| 343610   | 881670   | 647360   | 145715.75 | 561922.5  | 1.94721435 | 0.0361627  |
| 6820200  | 6083800  | 6770700  | 12178750  | 6687075   | -0.8649189 | 0.03620146 |
| 1268600  | 1214000  | 958880   | 323815    | 1067585   | 1.72110922 | 0.03620146 |
| 115140   | 70090    | 108760   | 222292.5  | 96769     | -1.1998424 | 0.03620146 |
| 59799    | 27689    | 48557    | 139960    | 39611.5   | -1.8210233 | 0.03620146 |
| 77467    | 134740   | 216430   | 445085    | 144754.25 | -1.6204752 | 0.03795863 |
| 18541    | 12017    | 17147    | 162549.75 | 19069.25  | -3.0915613 | 0.03914651 |
| 1518900  | 1197700  | 732340   | 428687.5  | 1265785   | 1.56203412 | 0.03992353 |
| 149780   | 270310   | 166490   | 60862.5   | 188457.5  | 1.63061371 | 0.04093396 |
| 25174    | 19397    | 57586    | 159650.5  | 33501.25  | -2.2526302 | 0.04238697 |
| 127630   | 134480   | 132420   | 568980    | 142922.5  | -1.9931449 | 0.04238697 |
| 267160   | 116040   | 244560   | 51791.75  | 196720    | 1.92534943 | 0.04238697 |
| 1009300  | 944980   | 958580   | 379262.5  | 974840    | 1.36196872 | 0.04406437 |
| 297140   | 315490   | 244280   | 66980.5   | 300232.5  | 2.16426711 | 0.04406437 |
| 351250   | 187910   | 232660   | 41506     | 202979.75 | 2.289944   | 0.04413184 |
| 148090   | 126970   | 154200   | 414377.5  | 149287.5  | -1.4728523 | 0.0445664  |
| 203430   | 183900   | 200480   | 529072.5  | 215472.5  | -1.2959617 | 0.04515199 |
| 187060   | 1016500  | 1168200  | 103883.5  | 635042.5  | 2.61188662 | 0.04515199 |
| 32307    | 84158    | 120960   | 277997.5  | 67276     | -2.0469081 | 0.04515199 |
| 255650   | 224000   | 236290   | 597720    | 236997.5  | -1.334598  | 0.04670607 |
| 293200   | 371700   | 372540   | 112879    | 335827.5  | 1.57294326 | 0.04670607 |
| 165300   | 176250   | 11906    | 25468     | 142731.5  | 2.48654619 | 0.04670607 |
| 3004.7   | 22898    | 75819    | 173854.5  | 26242.625 | -2.7278965 | 0.04670607 |
| 13602000 | 15776000 | 15409000 | 9666775   | 15179750  | 0.65104146 | 0.04931096 |
| 61592    | 6628     | 3466.8   | 939599.35 | 21783.45  | -5.4307413 | 0.05026508 |
| 577200   | 733430   | 702300   | 1588575   | 658185    | -1.2711682 | 0.05041022 |
| 102680   | 142780   | 89424    | 232600    | 104585.5  | -1.1531683 | 0.05041022 |
| 3240100  | 7059100  | 10187000 | 2451825   | 5947000   | 1.27830607 | 0.05041022 |
| 321280   | 317210   | 335340   | 51588.35  | 248837    | 2.27008381 | 0.05041022 |
| 413970   | 903230   | 470030   | 177165.75 | 535875    | 1.59679679 | 0.05041022 |
| 722570   | 1659600  | 1257400  | 527632.5  | 1531317.5 | 1.5371681  | 0.05041022 |
| 7001800  | 10553000 | 10290000 | 4168625   | 8538975   | 1.03449131 | 0.05041022 |
| 836510   | 588680   | 408830   | 1292750   | 556097.5  | -1.2170335 | 0.05041022 |
| 38028    | 115890   | 226760   | 494445    | 106703.75 | -2.2121992 | 0.05041022 |
| 2183700  | 2046500  | 1822500  | 966395    | 1961700   | 1.02141953 | 0.05096414 |
| 266780   | 222540   | 251950   | 667002.5  | 233050    | -1.5170527 | 0.05096414 |
| 19307    | 105000   | 111430   | 271260    | 84069.25  | -1.6900262 | 0.05119509 |
| 3124300  | 2621400  | 2628800  | 1386327.5 | 2872975   | 1.05127733 | 0.05165225 |

|         |         |         |           |           |            |            |
|---------|---------|---------|-----------|-----------|------------|------------|
| 55004   | 48036   | 33238   | 165907.75 | 46687     | -1.8292885 | 0.05165225 |
| 2371600 | 3278100 | 2744200 | 1397600   | 2610100   | 0.90115357 | 0.05165225 |
| 62306   | 284530  | 190010  | 20325.375 | 144316    | 2.82787738 | 0.05165225 |
| 103310  | 558730  | 333250  | 66014.25  | 310557.5  | 2.23401102 | 0.05165225 |
| 136650  | 241090  | 143790  | 417055    | 166700    | -1.3229836 | 0.05460306 |
| 25275   | 17993   | 221050  | 267440    | 68456.125 | -1.9659637 | 0.05533008 |
| 166100  | 123530  | 4507.8  | 20633.45  | 116386.95 | 2.49587233 | 0.05533008 |
| 109700  | 97408   | 102580  | 5526.2025 | 79060.1   | 3.83858945 | 0.05533008 |
| 192280  | 1130600 | 194030  | 67202.5   | 467152.5  | 2.79730678 | 0.05592785 |
| 1023400 | 1422200 | 1484200 | 528307.5  | 1277200   | 1.27353466 | 0.05649189 |
| 34233   | 21403   | 168040  | 254267.5  | 66373.25  | -1.9376732 | 0.05685636 |
| 56261   | 105770  | 73117   | 278570    | 71156.75  | -1.9689674 | 0.05685636 |
| 47379   | 71849   | 51946   | 163874    | 53119.5   | -1.6252735 | 0.05953809 |
| 132140  | 101770  | 99002   | 232527.5  | 115978    | -1.0035502 | 0.06115052 |
| 49650   | 74555   | 44184   | 12550.925 | 58141.25  | 2.21176839 | 0.06115052 |
| 108160  | 143860  | 95981   | 34643.75  | 115507.75 | 1.73732264 | 0.06115052 |
| 1093200 | 1001000 | 1138700 | 501595    | 1128450   | 1.16974762 | 0.06182976 |
| 331560  | 504200  | 349090  | 128237.25 | 391060    | 1.60857458 | 0.06182976 |
| 59303   | 52520   | 97481   | 163280    | 56948.25  | -1.5196247 | 0.06182976 |
| 191970  | 227870  | 259470  | 461272.5  | 215065    | -1.1008465 | 0.06182976 |
| 641890  | 479000  | 501700  | 1162185   | 484940    | -1.2609616 | 0.06182976 |
| 74095   | 29139   | 112590  | 186732.5  | 72255.25  | -1.3697987 | 0.06182976 |
| 44906   | 199890  | 104640  | 33460.575 | 150636.5  | 2.17053724 | 0.06182976 |
| 231650  | 222400  | 243900  | 483740    | 243810    | -0.9884745 | 0.06429777 |
| 380470  | 356930  | 313030  | 847907.5  | 351215    | -1.2715524 | 0.06513769 |
| 129320  | 242760  | 194390  | 65951.5   | 178827.5  | 1.43909123 | 0.06559642 |
| 138620  | 196320  | 125350  | 395005    | 156127.5  | -1.3391462 | 0.06810254 |
| 765640  | 945150  | 1443800 | 2061550   | 988217.5  | -1.0608289 | 0.06810254 |
| 24107   | 209930  | 259850  | 45701.25  | 346044.25 | 2.920651   | 0.06810254 |
| 145960  | 75754   | 90319   | 212587.5  | 107343.25 | -0.9858253 | 0.06810254 |
| 139360  | 279650  | 156800  | 56397.5   | 167937.75 | 1.57422345 | 0.06810254 |
| 90605   | 91330   | 80807   | 18760.5   | 85330.5   | 2.18536322 | 0.06810254 |
| 549840  | 120580  | 671220  | 167514.25 | 489017.5  | 1.54560227 | 0.06822085 |
| 122090  | 844900  | 280240  | 35960.3   | 329013.5  | 3.19366982 | 0.07028568 |
| 58836   | 69783   | 221490  | 339245    | 113324.75 | -1.5818646 | 0.07149092 |
| 63207   | 46407   | 43850   | 165555    | 60024.5   | -1.4636872 | 0.07149092 |
| 71498   | 618790  | 515690  | 88632.5   | 337969.5  | 1.93098534 | 0.07149092 |
| 272720  | 215680  | 75605   | 79762.25  | 213516.25 | 1.42056786 | 0.07196532 |
| 88400   | 223640  | 88775   | 40231.575 | 126081.25 | 1.64795362 | 0.07196532 |
| 123740  | 216880  | 99194   | 62994.5   | 189213.5  | 1.58671725 | 0.07458409 |
| 780600  | 805670  | 881540  | 319850    | 746237.5  | 1.22223938 | 0.07525572 |
| 162590  | 235440  | 208470  | 82676     | 192100    | 1.21631702 | 0.07718251 |

|          |          |          |            |           |            |            |
|----------|----------|----------|------------|-----------|------------|------------|
| 142230   | 472600   | 324870   | 95054.75   | 275315    | 1.53425259 | 0.07718251 |
| 341080   | 194040   | 370810   | 728435     | 308817.5  | -1.2380457 | 0.08276292 |
| 720610   | 1157100  | 759060   | 271945     | 701757.5  | 1.36765768 | 0.08303207 |
| 52500    | 161540   | 140560   | 26188.475  | 103623.25 | 1.98434378 | 0.08492744 |
| 80395    | 142330   | 113120   | 309942.5   | 108282    | -1.5172072 | 0.085678   |
| 155550   | 182040   | 210330   | 522455     | 179695    | -1.5397565 | 0.085678   |
| 151650   | 192990   | 188620   | 86707.75   | 207302.5  | 1.25750466 | 0.08595075 |
| 209780   | 686000   | 689830   | 253695     | 539282.5  | 1.08794613 | 0.08730077 |
| 792080   | 584090   | 623860   | 361457.5   | 845707.5  | 1.22633275 | 0.08730077 |
| 19315    | 71735    | 208810   | 431408.825 | 79392.5   | -2.4419811 | 0.08844398 |
| 186100   | 87709    | 125220   | 351237.5   | 148302.25 | -1.2439064 | 0.08844398 |
| 112460   | 68685    | 46334    | 195082.5   | 86299.75  | -1.1766561 | 0.08844398 |
| 255730   | 2219400  | 297680   | 30236.25   | 697505    | 4.52785243 | 0.08844398 |
| 18959    | 139820   | 154550   | 205722.5   | 105497.25 | -0.9634942 | 0.08844398 |
| 154850   | 283570   | 223590   | 86740      | 207420    | 1.25778566 | 0.08844398 |
| 50105000 | 40857000 | 43203000 | 39250500   | 46357750  | 0.24009951 | 0.09460303 |
| 143310   | 77678    | 113030   | 265920     | 122564.5  | -1.1174511 | 0.09695131 |
| 8452700  | 9697400  | 9916000  | 5227325    | 9151175   | 0.80788414 | 0.09834354 |
| 82090    | 136960   | 155270   | 274157.5   | 116982.25 | -1.2287153 | 0.09962454 |
| 986740   | 1370200  | 1142500  | 535845     | 1105692.5 | 1.04506257 | 0.09962454 |
| 9224100  | 5472400  | 6524900  | 11602000   | 7436175   | -0.6417409 | 0.10045813 |
| 956960   | 1582800  | 1549900  | 515082.5   | 1150350   | 1.15919745 | 0.1035384  |
| 2927500  | 2793700  | 2237900  | 1526902.5  | 2601850   | 0.76892985 | 0.11122216 |
| 7180.2   | 8778.5   | 48804    | 92614.75   | 30080.925 | -1.622393  | 0.11204022 |
| 36118    | 67305    | 93412    | 159498     | 52526.25  | -1.6024278 | 0.11237723 |
| 687720   | 779620   | 761280   | 1517475    | 808305    | -0.9087011 | 0.11237723 |
| 1503700  | 1551900  | 1658900  | 686873     | 1511625   | 1.137985   | 0.11237723 |
| 283750   | 402980   | 396110   | 781835     | 327332.5  | -1.2561073 | 0.11487675 |
| 932170   | 624190   | 670950   | 346597.5   | 711195    | 1.03698393 | 0.1190616  |
| 124770   | 158290   | 204580   | 56991      | 143006    | 1.32726967 | 0.12203181 |
| 6285500  | 7271900  | 7161300  | 3799675    | 6263550   | 0.72110454 | 0.12461349 |
| 301740   | 4150900  | 965650   | 204895     | 1387665   | 2.75970264 | 0.12508379 |
| 28662    | 20750    | 35208    | 76578.5    | 23064.85  | -1.7312435 | 0.12508379 |
| 16637    | 18924    | 19435    | 72244.75   | 16738.5   | -2.1097225 | 0.1259213  |
| 72413    | 487540   | 373970   | 79892      | 253382.25 | 1.66519251 | 0.12592517 |
| 78757    | 48103    | 51646    | 26441.5    | 95401.5   | 1.85120793 | 0.12707149 |
| 20691    | 216690   | 63945    | 12025.45   | 85431.75  | 2.82868145 | 0.12741849 |
| 47269    | 212320   | 267200   | 43337.1    | 142368.25 | 1.71595292 | 0.12741849 |
| 190850   | 125290   | 121150   | 366920     | 167495    | -1.1313475 | 0.12741849 |
| 421590   | 1508800  | 1057400  | 384527.5   | 858110    | 1.15807582 | 0.12741849 |
| 8345.6   | 49815    | 34932    | 130739     | 51165.65  | -1.3534421 | 0.12741849 |
| 70628    | 431690   | 345420   | 84995.75   | 234687.75 | 1.46527993 | 0.12741849 |

|         |         |         |            |           |            |            |
|---------|---------|---------|------------|-----------|------------|------------|
| 90140   | 60248   | 56893   | 165492.5   | 73027     | -1.180264  | 0.12741849 |
| 23071   | 22154   | 31541   | 72604.5    | 20512.375 | -1.8235644 | 0.12741849 |
| 33999   | 70444   | 183840  | 268372.5   | 104315.75 | -1.3632798 | 0.12741849 |
| 27286   | 30058   | 3319.2  | 66160.5    | 18732.3   | -1.8204421 | 0.12741849 |
| 231350  | 201140  | 225050  | 412145     | 221970    | -0.8927873 | 0.12741849 |
| 36493   | 49154   | 46473   | 12515.725  | 43459.25  | 1.79592141 | 0.12874739 |
| 118880  | 49116   | 35708   | 138931     | 60075.75  | -1.2095139 | 0.12874739 |
| 41058   | 55556   | 43645   | 13500.65   | 45909.75  | 1.76577171 | 0.12874739 |
| 54309   | 346830  | 331630  | 78412.5    | 207434.25 | 1.40349856 | 0.1304325  |
| 229750  | 205520  | 167020  | 588482.5   | 269517.5  | -1.1266206 | 0.13149879 |
| 66377   | 10869   | 63859   | 125538.75  | 52933.75  | -1.245873  | 0.13189348 |
| 2326700 | 2881600 | 2687200 | 1760825    | 2793775   | 0.6659643  | 0.13446539 |
| 171420  | 735240  | 817570  | 185420     | 465185    | 1.32700771 | 0.13887805 |
| 142380  | 116480  | 116500  | 57275.425  | 134162.5  | 1.22799331 | 0.13887805 |
| 3471300 | 3124200 | 3205000 | 2271175    | 3768325   | 0.73048452 | 0.13887805 |
| 89457   | 115080  | 74957   | 35144.25   | 94613.25  | 1.42875357 | 0.13887805 |
| 65139   | 64879   | 38030   | 26867      | 110337    | 2.03800952 | 0.13947911 |
| 23617   | 102380  | 110980  | 185877.5   | 92744.25  | -1.0030224 | 0.14167613 |
| 164250  | 362150  | 73554   | 82341      | 196411    | 1.25419286 | 0.14167668 |
| 401630  | 671810  | 690480  | 2056452.5  | 736730    | -1.4809499 | 0.1435742  |
| 29151   | 86695   | 50241   | 30430.25   | 133586.75 | 2.13419883 | 0.14377199 |
| 34155   | 58268   | 17064   | 89948.25   | 36465.5   | -1.302563  | 0.14377199 |
| 1355300 | 1205200 | 1095500 | 636837.5   | 1215300   | 0.93231529 | 0.14377199 |
| 161330  | 11142   | 324380  | 43661.4    | 147435.5  | 1.75565365 | 0.14377199 |
| 16888   | 97734   | 40124   | 5717.75    | 39852.3   | 2.80114354 | 0.14377199 |
| 149090  | 442200  | 346060  | 507505     | 286627.5  | -0.824245  | 0.14377199 |
| 420770  | 255310  | 319010  | 796830     | 394047.5  | -1.0159024 | 0.14377199 |
| 3441100 | 4666100 | 3296400 | 2647825    | 3881350   | 0.55175076 | 0.14377199 |
| 180080  | 107820  | 119440  | 233735     | 138757.5  | -0.752308  | 0.14540549 |
| 156680  | 145030  | 72809   | 58529      | 125774.75 | 1.10361879 | 0.14752219 |
| 6276700 | 6648600 | 5238600 | 4176100    | 6288575   | 0.59057688 | 0.14752219 |
| 30573   | 26051   | 24938   | 90061.3    | 27120     | -1.7315501 | 0.15087426 |
| 107470  | 99094   | 75858   | 29475      | 84278     | 1.51566426 | 0.15232593 |
| 50430   | 5392.8  | 11878   | 56365      | 17353.575 | -1.6995667 | 0.15457962 |
| 106100  | 155280  | 104130  | 222652.5   | 130552.5  | -0.7701637 | 0.15531662 |
| 1420100 | 2446500 | 1888500 | 655792.5   | 1505870   | 1.19928592 | 0.15531662 |
| 10823   | 22587   | 6224.5  | 54767      | 16449.625 | -1.7352522 | 0.15531662 |
| 7307.5  | 8677.5  | 20603   | 102389.775 | 27458.5   | -1.8987469 | 0.15543779 |
| 571810  | 914020  | 323720  | 362015     | 703337.5  | 0.95816766 | 0.15602982 |
| 264110  | 240550  | 294610  | 128994.5   | 240945    | 0.90139431 | 0.15740887 |
| 182480  | 276310  | 266400  | 126122.5   | 233385    | 0.88788617 | 0.15825906 |
| 573210  | 1082600 | 422790  | 331622.5   | 647340    | 0.96498176 | 0.15825906 |

|         |         |         |           |            |            |            |
|---------|---------|---------|-----------|------------|------------|------------|
| 119130  | 88807   | 151370  | 208336.75 | 111738.5   | -0.898791  | 0.15825906 |
| 42887   | 89202   | 97492   | 18717.625 | 60639.25   | 1.69585452 | 0.1584313  |
| 38280   | 236710  | 232590  | 74940.75  | 164620     | 1.1353173  | 0.1591984  |
| 14477   | 17530   | 32894   | 7728.825  | 61640.25   | 2.99555171 | 0.16058087 |
| 77617   | 114330  | 87730   | 33787.25  | 88459.75   | 1.38854223 | 0.16058087 |
| 60546   | 422190  | 56036   | 404324.5  | 147081.75  | -1.4588954 | 0.16521946 |
| 63700   | 108520  | 252120  | 227295    | 120346     | -0.9173778 | 0.16521946 |
| 45101   | 24192   | 934180  | 28856.2   | 267413.5   | 3.21211907 | 0.16582185 |
| 207960  | 96337   | 93231   | 225967.5  | 138017     | -0.7112693 | 0.16588715 |
| 324860  | 380840  | 337630  | 192105    | 340332.5   | 0.82504986 | 0.17145855 |
| 248220  | 314830  | 470730  | 583445    | 332430     | -0.8115461 | 0.17541736 |
| 271090  | 268100  | 200390  | 186680    | 516970     | 1.46951319 | 0.17541736 |
| 1193400 | 2985900 | 2399300 | 1168150   | 1974800    | 0.75748101 | 0.17901125 |
| 37740   | 49638   | 53806   | 100966    | 39659      | -1.3481493 | 0.1792794  |
| 35281   | 36585   | 105230  | 28390.775 | 89601.5    | 1.65810065 | 0.1792794  |
| 144230  | 127590  | 125800  | 320477.5  | 160690     | -0.9959429 | 0.19099952 |
| 112100  | 682200  | 692670  | 134300.5  | 375359.25  | 1.48280736 | 0.19099952 |
| 3733.4  | 13630   | 70466   | 95337.525 | 22321.125  | -2.0946344 | 0.19319366 |
| 147710  | 202660  | 152840  | 56668.5   | 128836     | 1.18491685 | 0.19319366 |
| 4210.4  | 8146.7  | 33624   | 44930.475 | 12087.05   | -1.8942321 | 0.19319366 |
| 59069   | 80314   | 63690   | 130237.5  | 70350.5    | -0.8885123 | 0.19630861 |
| 43154   | 1302100 | 47313   | 334714    | 1201891.75 | 1.84430616 | 0.19848967 |
| 19943   | 12259   | 795050  | 17279.4   | 208771.175 | 3.5947975  | 0.19848967 |
| 6157800 | 5258600 | 6288300 | 4081425   | 5943875    | 0.54233083 | 0.19848967 |
| 1195.3  | 26357   | 1845.8  | 51666     | 8803.3     | -2.5530989 | 0.19848967 |
| 94616   | 39374   | 69905   | 153287.5  | 70688.75   | -1.1166875 | 0.19925445 |
| 1194900 | 1991300 | 1771700 | 889712.5  | 1534325    | 0.78619298 | 0.201537   |
| 262970  | 255950  | 347350  | 449985    | 270547.5   | -0.733995  | 0.20582607 |
| 63539   | 142590  | 74942   | 185944.75 | 87906.5    | -1.0808323 | 0.20787663 |
| 360120  | 466620  | 451830  | 711860    | 400045     | -0.8314312 | 0.20932988 |
| 37953   | 20890   | 23147   | 70159.25  | 28447.75   | -1.3023188 | 0.20932988 |
| 200210  | 295310  | 552330  | 149191.75 | 314290     | 1.07492861 | 0.20963194 |
| 183420  | 108830  | 146980  | 307350    | 154900     | -0.9885453 | 0.20963194 |
| 1130700 | 1834500 | 1518000 | 799447.5  | 1370505    | 0.77763239 | 0.20963194 |
| 18152   | 12707   | 8793.5  | 42241.25  | 13748.875  | -1.619339  | 0.20963194 |
| 49748   | 67854   | 92096   | 24016.65  | 62470      | 1.3791286  | 0.21128811 |
| 4052.4  | 36515   | 45181   | 3620.5    | 22454.775  | 2.63276141 | 0.21150657 |
| 3482.5  | 89648   | 21550   | 2743.5    | 29166.45   | 3.41022032 | 0.21150657 |
| 1162200 | 1451900 | 1453600 | 2027350   | 1328425    | -0.6098784 | 0.2157098  |
| 208630  | 160440  | 185730  | 347427.5  | 195670     | -0.8282894 | 0.22120431 |
| 168550  | 226150  | 208050  | 84618.5   | 163437.75  | 0.94969623 | 0.22120431 |
| 53394   | 73190   | 109630  | 127236.25 | 64540.75   | -0.9792275 | 0.22222278 |



|         |         |         |           |            |            |            |
|---------|---------|---------|-----------|------------|------------|------------|
| 9494.4  | 15065   | 152660  | 5567.985  | 44905.875  | 3.01167697 | 0.22778483 |
| 52605   | 57145   | 42987   | 17266.85  | 44330.75   | 1.36030286 | 0.23075568 |
| 446980  | 399800  | 397090  | 776862.5  | 437845     | -0.827239  | 0.23075568 |
| 389110  | 229660  | 278910  | 604697.5  | 354067.5   | -0.7721892 | 0.23177839 |
| 816.51  | 46754   | 45167   | 3532.025  | 24109.0525 | 2.77100749 | 0.23177839 |
| 407010  | 1562900 | 1254300 | 501375    | 900520     | 0.84486826 | 0.23177839 |
| 4784300 | 4765600 | 5328400 | 3268575   | 4630300    | 0.50244387 | 0.23177839 |
| 25667   | 27755   | 32874   | 64340.75  | 23701.575  | -1.4407498 | 0.23177839 |
| 18052   | 148520  | 201220  | 258297.5  | 144148     | -0.8414829 | 0.23177839 |
| 44733   | 2822.8  | 1843.1  | 4000.15   | 21319.225  | 2.41402899 | 0.23177839 |
| 345930  | 223100  | 265950  | 451862.5  | 257842.5   | -0.8093938 | 0.23177839 |
| 709640  | 709640  | 391840  | 376905    | 665942.5   | 0.82119668 | 0.23331566 |
| 24982   | 8104.3  | 75067   | 86417     | 31963.075  | -1.4349089 | 0.23372182 |
| 34773   | 3553.6  | 10072   | 10710.175 | 46082.15   | 2.10522598 | 0.23372182 |
| 5250.7  | 9837.6  | 35569   | 49683.25  | 16550.075  | -1.5859218 | 0.23479978 |
| 50000   | 42332   | 36205   | 119322.75 | 56594      | -1.0761481 | 0.23753108 |
| 168860  | 288210  | 254190  | 769809.75 | 205985     | -1.9019627 | 0.23753108 |
| 262070  | 303990  | 223210  | 395412.5  | 225062.5   | -0.8130328 | 0.23885918 |
| 21916   | 31447   | 47169   | 86040.25  | 32040.25   | -1.4251263 | 0.23895281 |
| 217340  | 265130  | 332350  | 168545    | 304830     | 0.85487106 | 0.24209521 |
| 139270  | 42887   | 221250  | 192885    | 108469.75  | -0.8304482 | 0.24300864 |
| 1772100 | 1763400 | 1365100 | 882052.5  | 1473000    | 0.739821   | 0.24453588 |
| 46108   | 39349   | 143680  | 165820    | 87254.25   | -0.9263207 | 0.24496826 |
| 69178   | 88863   | 54066   | 164062.5  | 87889.25   | -0.9004869 | 0.24579133 |
| 58483   | 126540  | 62015   | 35765     | 85822.25   | 1.26280328 | 0.24579317 |
| 197360  | 97081   | 76290   | 258035    | 145935.25  | -0.8222384 | 0.24592667 |
| 3977100 | 5727800 | 4832500 | 3284375   | 4618100    | 0.49168055 | 0.24918136 |
| 46273   | 95019   | 90547   | 144390    | 79911.5    | -0.8534958 | 0.24918658 |
| 457730  | 612400  | 952480  | 494787.5  | 824802.5   | 0.73723965 | 0.24935631 |
| 4436    | 7209.1  | 29021   | 34917.25  | 12039.1    | -1.5362124 | 0.24935631 |
| 21713   | 5042.5  | 6126.7  | 28152     | 10848.8    | -1.3757019 | 0.24935631 |
| 1081600 | 2128200 | 1824200 | 969145    | 1538850    | 0.66706817 | 0.25008739 |
| 257070  | 1266100 | 4050800 | 2782600   | 1636967.5  | -0.7654079 | 0.25219322 |
| 235810  | 153080  | 216250  | 324965    | 190682.5   | -0.7691119 | 0.25308938 |
| 392970  | 442050  | 466040  | 722847.5  | 437777.5   | -0.7234935 | 0.25308938 |
| 4059100 | 4133800 | 3862400 | 5819025   | 4010750    | -0.5369054 | 0.25869124 |
| 1654700 | 1243800 | 1295800 | 888847.5  | 1434850    | 0.6908921  | 0.26391284 |
| 42739   | 42379   | 43623   | 86321.75  | 42839.5    | -1.0107825 | 0.26601146 |
| 4442.4  | 5804.5  | 19896   | 24716.875 | 8850       | -1.481747  | 0.26601146 |
| 24252   | 12834   | 87762   | 84002.75  | 33887      | -1.3097046 | 0.26663309 |
| 9605    | 6241.8  | 18132   | 15098.6   | 83524.7    | 2.46778811 | 0.2693907  |
| 101390  | 120280  | 293090  | 275375    | 153233     | -0.8456706 | 0.27036293 |

|         |         |         |            |           |            |            |
|---------|---------|---------|------------|-----------|------------|------------|
| 1407.3  | 50174   | 33731   | 5400.1     | 23121.35  | 2.09816761 | 0.27069187 |
| 60867   | 117150  | 95086   | 147040     | 84554.75  | -0.798251  | 0.27069187 |
| 161230  | 54762   | 60404   | 177142.5   | 102751.5  | -0.7857509 | 0.27069187 |
| 2748.7  | 8254.5  | 3717.6  | 35146.5    | 4400.925  | -2.9975023 | 0.27069187 |
| 153700  | 137480  | 145220  | 267690     | 163395    | -0.7121994 | 0.27069187 |
| 10953   | 2708    | 1440.6  | 16825.325  | 4010.255  | -2.0688685 | 0.27069187 |
| 78726   | 397320  | 219550  | 101590.5   | 196438.25 | 0.95131038 | 0.27479703 |
| 33237   | 21110   | 92116   | 109348.775 | 41459.75  | -1.3991537 | 0.27479703 |
| 176820  | 259080  | 236580  | 357297.5   | 211177.5  | -0.7586697 | 0.27907525 |
| 76045   | 18681   | 62338   | 93228.825  | 40832.675 | -1.191052  | 0.28046713 |
| 54695   | 42586   | 958030  | 666590.5   | 277004.5  | -1.2668913 | 0.28093453 |
| 79196   | 79480   | 37855   | 28327      | 61374.5   | 1.11546155 | 0.28093453 |
| 403020  | 500070  | 312790  | 676072.5   | 407887.5  | -0.7290067 | 0.28227547 |
| 58434   | 19682   | 42940   | 104054     | 47215.75  | -1.1399923 | 0.28227547 |
| 85039   | 15163   | 23363   | 91481.5    | 47389.75  | -0.948905  | 0.28227547 |
| 47938   | 61726   | 89258   | 104441.75  | 53157     | -0.9743669 | 0.28386379 |
| 75791   | 180620  | 39786   | 39070.25   | 88857.25  | 1.18541901 | 0.28684699 |
| 512990  | 669410  | 391540  | 299490.25  | 535607.5  | 0.83866713 | 0.28689662 |
| 5787    | 8643.4  | 2482.8  | 3364.95    | 14011.05  | 2.0579081  | 0.28793848 |
| 1170100 | 1616400 | 1872000 | 2099975    | 1427550   | -0.5568309 | 0.28793848 |
| 9723800 | 7224400 | 7032500 | 5795425    | 8561425   | 0.56293648 | 0.28793848 |
| 283670  | 1867300 | 1592600 | 526995     | 997952.5  | 0.92118187 | 0.28876928 |
| 71503   | 80045   | 105310  | 141082.5   | 83194.25  | -0.7619833 | 0.29172544 |
| 154400  | 81737   | 210360  | 266247.5   | 151319.25 | -0.8151724 | 0.2925053  |
| 1274600 | 1366600 | 1000500 | 823332.5   | 1289750   | 0.64754437 | 0.2925053  |
| 4478.1  | 2245.3  | 12429   | 3666.25    | 13941.1   | 1.92696733 | 0.29302389 |
| 1354.1  | 19820   | 6342    | 3775.6     | 11783.525 | 1.64199335 | 0.29739218 |
| 168210  | 185920  | 405110  | 391355     | 242272.5  | -0.6918472 | 0.29881282 |
| 271450  | 58581   | 94713   | 90817      | 158871    | 0.80682152 | 0.29970073 |
| 34542   | 8267.3  | 21512   | 67507.925  | 24087.825 | -1.4867527 | 0.30080935 |
| 74912   | 136330  | 309480  | 567670     | 325813    | -0.8010083 | 0.30310862 |
| 191250  | 172340  | 107200  | 86144      | 157250    | 0.8682378  | 0.30464012 |
| 46879   | 51165   | 267540  | 181321.75  | 97964.75  | -0.8882174 | 0.30464012 |
| 55796   | 57066   | 88298   | 119839     | 62966.75  | -0.9284354 | 0.30464012 |
| 28107   | 18535   | 6001    | 7568.225   | 21599     | 1.51293763 | 0.30464012 |
| 124490  | 95114   | 100180  | 154870     | 96725.5   | -0.6790895 | 0.30563124 |
| 8004.5  | 1154.5  | 56796   | 4121.405   | 17746.15  | 2.10629792 | 0.30563124 |
| 22599   | 7597.5  | 185060  | 19210.1    | 57817.375 | 1.58963808 | 0.30563124 |
| 9605.1  | 11913   | 13930   | 35792      | 12671.275 | -1.4980755 | 0.30563124 |
| 9030.8  | 24520   | 71583   | 103007     | 28834.95  | -1.836852  | 0.30563124 |
| 2661600 | 2176600 | 2024600 | 1334107.5  | 2040450   | 0.61301244 | 0.30563124 |
| 572670  | 745150  | 776910  | 368754     | 597230    | 0.69562794 | 0.30563124 |

|         |         |         |           |           |            |            |
|---------|---------|---------|-----------|-----------|------------|------------|
| 21876   | 64464   | 55961   | 14267.175 | 36037.225 | 1.33678822 | 0.30563124 |
| 14541   | 44276   | 4160.5  | 5478.825  | 17372.3   | 1.66485034 | 0.30563124 |
| 64149   | 2207.7  | 99350   | 94291.5   | 43188     | -1.1264972 | 0.30563124 |
| 28528   | 29037   | 35422   | 78403     | 26388.25  | -1.5710132 | 0.30563124 |
| 65032   | 80486   | 68063   | 36065.5   | 70673.75  | 0.97055504 | 0.30780883 |
| 48419   | 24094   | 17314   | 48128.5   | 142334.25 | 1.5643195  | 0.30883481 |
| 6810100 | 9915500 | 7702900 | 10329600  | 7565050   | -0.4493629 | 0.31422973 |
| 135640  | 164450  | 163860  | 76945.75  | 127781.75 | 0.73176825 | 0.31675762 |
| 23770   | 355260  | 355670  | 107251    | 203287.5  | 0.92253041 | 0.31675762 |
| 1764.7  | 6160.7  | 78263   | 4200.3    | 22611.175 | 2.42847169 | 0.31722176 |
| 88335   | 153910  | 157340  | 70320.75  | 120115.75 | 0.77240297 | 0.31823548 |
| 246060  | 768800  | 617650  | 289372.75 | 490545    | 0.76145642 | 0.31823548 |
| 472590  | 432820  | 583420  | 747702.5  | 482770    | -0.6311283 | 0.31823548 |
| 36728   | 43425   | 47273   | 65827     | 32819.025 | -1.0041471 | 0.31823548 |
| 77010   | 72297   | 1190900 | 698342.5  | 348540.75 | -1.0026074 | 0.31823548 |
| 72807   | 41929   | 24611   | 99551.5   | 55679     | -0.8383098 | 0.31895914 |
| 32508   | 56371   | 56463   | 97257.25  | 54871.25  | -0.8257554 | 0.32208788 |
| 277000  | 89920   | 98758   | 231725    | 159754.5  | -0.5365571 | 0.32445978 |
| 6780.6  | 4938.3  | 6457.8  | 4844.25   | 18853.675 | 1.96050054 | 0.32882632 |
| 18456   | 23717   | 75478   | 66513     | 31634.825 | -1.0721227 | 0.33041783 |
| 75140   | 166010  | 468390  | 354660    | 189231.75 | -0.9062825 | 0.33529612 |
| 349690  | 1380500 | 651480  | 1078457.5 | 701170    | -0.6211331 | 0.33870085 |
| 5401.7  | 4888.6  | 4390.9  | 4855.95   | 18644.55  | 1.94092851 | 0.33870085 |
| 2562400 | 1796600 | 1523400 | 2851400   | 2112250   | -0.4328898 | 0.34008037 |
| 4897.7  | 34840   | 5089    | 7144.625  | 20011.425 | 1.48589371 | 0.34008037 |
| 149380  | 229280  | 296830  | 320757.5  | 206475    | -0.6355159 | 0.34364958 |
| 327250  | 281550  | 1086200 | 770087.5  | 470627.5  | -0.7104368 | 0.34368682 |
| 32083   | 19051   | 69276   | 68125.5   | 36533.5   | -0.8989749 | 0.34368682 |
| 2107.3  | 1823    | 10934   | 5073.2    | 22633.825 | 2.15751247 | 0.34368682 |
| 31234   | 102.84  | 1375.4  | 36900.4   | 11246.06  | -1.7142168 | 0.34516838 |
| 14376   | 14800   | 42114   | 54990.175 | 21939.5   | -1.3256432 | 0.34659078 |
| 109140  | 152980  | 255720  | 93986.5   | 154617.5  | 0.71817816 | 0.34709601 |
| 52082   | 111340  | 114620  | 140642.5  | 86880.5   | -0.6949283 | 0.35000872 |
| 276970  | 154080  | 156060  | 321042.5  | 211737.5  | -0.6004875 | 0.35084074 |
| 33730   | 84497   | 245580  | 45673.475 | 100502.75 | 1.13780651 | 0.35317348 |
| 112970  | 104030  | 70890   | 163910    | 105262.5  | -0.6389123 | 0.35468279 |
| 31686   | 26986   | 157740  | 23145.125 | 56464.075 | 1.2866249  | 0.35508633 |
| 526580  | 1070700 | 815260  | 1018415   | 674395    | -0.5946598 | 0.35509454 |
| 138000  | 143760  | 133210  | 193175    | 131405    | -0.5558882 | 0.35662077 |
| 153380  | 277050  | 286820  | 370140    | 227795    | -0.700335  | 0.36776294 |
| 27561   | 17514   | 21755   | 46924     | 120860    | 1.36493894 | 0.36930931 |
| 2570500 | 1675000 | 1544800 | 2471225   | 1831850   | -0.431925  | 0.37128333 |

|         |         |         |            |            |            |            |
|---------|---------|---------|------------|------------|------------|------------|
| 98620   | 144780  | 107210  | 62781.25   | 107671     | 0.77822407 | 0.37645964 |
| 111590  | 615090  | 118440  | 138109.75  | 241042.5   | 0.80347237 | 0.37919026 |
| 7388.2  | 24945   | 66887   | 12670.525  | 29810.8    | 1.23435879 | 0.37922762 |
| 38763   | 59587   | 2817.5  | 9130.675   | 25573.975  | 1.485883   | 0.38120393 |
| 50944   | 4956.5  | 25610   | 49087.15   | 20465.1325 | -1.2621774 | 0.38120393 |
| 602600  | 1131000 | 1692100 | 646392.5   | 1002445    | 0.63304072 | 0.38176444 |
| 329230  | 264660  | 257870  | 426360     | 295380     | -0.5294999 | 0.38361433 |
| 6359500 | 5251700 | 8370900 | 4383325    | 5899325    | 0.42852424 | 0.3864885  |
| 103600  | 57315   | 46197   | 121197.5   | 72431.5    | -0.7426708 | 0.39265021 |
| 264660  | 336570  | 324060  | 438950     | 308625     | -0.5082017 | 0.39824168 |
| 912120  | 983610  | 957010  | 1400275    | 1005585    | -0.4776752 | 0.39824168 |
| 46280   | 26879   | 15811   | 55226.25   | 29003      | -0.929152  | 0.39824168 |
| 476810  | 449730  | 693370  | 778492.5   | 522702.5   | -0.5746931 | 0.39824168 |
| 449870  | 431860  | 236880  | 273742.5   | 440055     | 0.68486441 | 0.40533567 |
| 191560  | 157690  | 216830  | 276473.25  | 150941     | -0.8731552 | 0.40568611 |
| 148530  | 171010  | 155460  | 196240     | 137686     | -0.5112373 | 0.40650782 |
| 23485   | 63086   | 4877700 | 2446635.25 | 1248557.5  | -0.9705368 | 0.40650782 |
| 115770  | 40712   | 250470  | 57197      | 107764.75  | 0.91387396 | 0.40650782 |
| 346760  | 530940  | 599070  | 266445     | 407775     | 0.61393557 | 0.40723403 |
| 624970  | 662950  | 822800  | 468640     | 640677.5   | 0.45111823 | 0.40723403 |
| 55257   | 59203   | 47621   | 33572.5    | 59343.75   | 0.82181612 | 0.40729541 |
| 235380  | 213550  | 197530  | 232552.5   | 168101.25  | -0.468226  | 0.4097549  |
| 175030  | 135520  | 516300  | 145047.25  | 231589.25  | 0.67504534 | 0.4097549  |
| 9784.8  | 6596.9  | 7650.7  | 17571.25   | 8345.875   | -1.0740816 | 0.4097549  |
| 152090  | 135540  | 90840   | 83731.5    | 130325     | 0.63827148 | 0.41266829 |
| 37454   | 74734   | 41027   | 20928.5    | 39537.125  | 0.91773905 | 0.41266829 |
| 6612.9  | 35607   | 30910   | 9852.05    | 21592.975  | 1.13206617 | 0.41266829 |
| 52750   | 28427   | 64722   | 77064.25   | 46353.5    | -0.7333835 | 0.41775926 |
| 10328   | 17105   | 155420  | 91274.5    | 47297.425  | -0.9484502 | 0.42216173 |
| 29733   | 32762   | 133480  | 26827.25   | 52397.5    | 0.9657988  | 0.42216173 |
| 4443.6  | 58876   | 39913   | 12968.65   | 28617.65   | 1.1418769  | 0.42538518 |
| 1152400 | 2388600 | 1551000 | 2013475    | 1474935    | -0.4490362 | 0.42538518 |
| 4243.1  | 3968.6  | 40058   | 4189.75    | 12186.8125 | 1.54038477 | 0.42685021 |
| 1096300 | 889280  | 970730  | 1435400    | 1044402.5  | -0.458775  | 0.42685021 |
| 26612   | 243040  | 107740  | 56239      | 104260.75  | 0.8905533  | 0.42685021 |
| 53721   | 45189   | 22210   | 21502.25   | 37895      | 0.81751988 | 0.42685021 |
| 1013200 | 679410  | 659880  | 1154645    | 823420     | -0.487749  | 0.42685021 |
| 2015100 | 2108700 | 1227700 | 1491825    | 1987475    | 0.4138584  | 0.42759822 |
| 52548   | 17617   | 25873   | 54557      | 28980.5    | -0.9126818 | 0.43153106 |
| 76961   | 129950  | 106010  | 144757.5   | 98256      | -0.5590207 | 0.43415151 |
| 98527   | 245500  | 227210  | 275122.5   | 187926.75  | -0.5499037 | 0.43415151 |
| 22953   | 2497.4  | 45572   | 42889.4    | 19279.85   | -1.1535273 | 0.43611781 |

|         |          |          |            |            |            |            |
|---------|----------|----------|------------|------------|------------|------------|
| 72307   | 89164    | 206400   | 166635     | 109873     | -0.6008546 | 0.43810037 |
| 62660   | 64270    | 51521    | 29704.475  | 50823.75   | 0.77482254 | 0.43839645 |
| 45140   | 141130   | 54428    | 45019.5    | 76946      | 0.7732963  | 0.44001605 |
| 52342   | 16316    | 7646.8   | 42909      | 22212.45   | -0.9499118 | 0.44001605 |
| 6030900 | 9135900  | 8556300  | 5489925    | 7459225    | 0.4422393  | 0.44179905 |
| 107210  | 280700   | 189370   | 124696     | 184672.5   | 0.56655386 | 0.44472899 |
| 59242   | 86761    | 89530    | 43434.575  | 72528      | 0.73969415 | 0.45686779 |
| 228120  | 184640   | 186110   | 283200     | 202007.5   | -0.4874124 | 0.45686779 |
| 178050  | 152400   | 179770   | 226490     | 174430     | -0.3767992 | 0.45686779 |
| 3903600 | 10985000 | 18103000 | 6236950    | 8917550    | 0.51580671 | 0.45686779 |
| 3714.4  | 20753    | 34625    | 6811.675   | 14924.56   | 1.13160689 | 0.45697688 |
| 4457    | 7737.4   | 11559    | 16070.1    | 7143.375   | -1.1697011 | 0.4603946  |
| 94396   | 289620   | 274450   | 131266     | 190514     | 0.53740374 | 0.46163114 |
| 132010  | 217260   | 269390   | 254690     | 190320     | -0.4203151 | 0.4632002  |
| 8160.7  | 50473    | 7326.6   | 10429.85   | 21573.325  | 1.04853014 | 0.4632002  |
| 154800  | 115650   | 76225    | 89897.5    | 128078.75  | 0.51067823 | 0.46782916 |
| 66703   | 56135    | 51153    | 91066      | 60861.75   | -0.5813767 | 0.46782916 |
| 4196100 | 3893600  | 4397600  | 3119350    | 3821650    | 0.29295022 | 0.46782916 |
| 44443   | 69226    | 108090   | 34572.5    | 60675.5    | 0.81148916 | 0.46782916 |
| 21304   | 31498    | 30711    | 13778.375  | 26130      | 0.92330138 | 0.46782916 |
| 16708   | 6327.8   | 70131    | 12833.525  | 26930.2    | 1.06930745 | 0.46782916 |
| 22757   | 122360   | 113430   | 128222.5   | 86502.75   | -0.5678315 | 0.46782916 |
| 78737   | 157070   | 151010   | 95365.75   | 139131.75  | 0.54490855 | 0.46811087 |
| 270770  | 234420   | 205710   | 387502.5   | 272932.5   | -0.5056614 | 0.47339994 |
| 158.19  | 21114    | 24149    | 6837.845   | 14122.0475 | 1.04633565 | 0.47339994 |
| 138220  | 145800   | 139250   | 187607.5   | 137620     | -0.4470274 | 0.47339994 |
| 897090  | 685170   | 565610   | 1110225    | 824367.5   | -0.4294926 | 0.47361947 |
| 96945   | 133370   | 227810   | 98850.5    | 145648.75  | 0.55917315 | 0.47718194 |
| 3698200 | 88084    | 2935000  | 1231390.75 | 1934196    | 0.65144536 | 0.48590928 |
| 28545   | 3981.3   | 17555    | 34280.925  | 16953.075  | -1.0158591 | 0.48718983 |
| 2618.7  | 13160    | 2922.2   | 10116.65   | 4835.8475  | -1.064891  | 0.48746041 |
| 3664.7  | 12646    | 29642    | 9512.225   | 18737.675  | 0.97808721 | 0.48746041 |
| 271120  | 1168300  | 257900   | 280300     | 444289.75  | 0.66452911 | 0.49034722 |
| 517260  | 412200   | 522330   | 359765     | 484737.5   | 0.43014886 | 0.49186035 |
| 191580  | 253280   | 143830   | 263210     | 195117.5   | -0.4318711 | 0.49186035 |
| 773210  | 788270   | 1007400  | 644137.5   | 853585     | 0.40616614 | 0.49319614 |
| 9837.1  | 23279    | 89496    | 18754      | 34994.025  | 0.89991027 | 0.49399746 |
| 125540  | 98909    | 114680   | 93009.75   | 134414.75  | 0.5312376  | 0.49740535 |
| 1377300 | 2875500  | 2069700  | 1506700    | 1934800    | 0.36079225 | 0.49900677 |
| 23259   | 25504    | 1922.9   | 35141.45   | 19205.475  | -0.8716561 | 0.49900677 |
| 263610  | 88816    | 90078    | 101388.25  | 149523.5   | 0.56048178 | 0.49900677 |
| 3275000 | 2814000  | 3095200  | 2496850    | 3011675    | 0.27045694 | 0.50174641 |

|         |         |         |            |           |            |            |
|---------|---------|---------|------------|-----------|------------|------------|
| 151070  | 334890  | 330600  | 178300     | 240517.5  | 0.43183517 | 0.50285037 |
| 26396   | 172420  | 142510  | 147175     | 104793.75 | -0.48998   | 0.50428897 |
| 90041   | 167680  | 182720  | 199032.5   | 152337.75 | -0.3857305 | 0.51262422 |
| 7117500 | 6580200 | 5405000 | 5264250    | 6644000   | 0.33582407 | 0.5176706  |
| 317850  | 462290  | 246160  | 564225     | 429327.5  | -0.394192  | 0.51774067 |
| 8039.6  | 52987   | 51553   | 24858      | 41757.15  | 0.74831302 | 0.51774067 |
| 119240  | 366020  | 164260  | 279887.5   | 205672.5  | -0.4444981 | 0.51774067 |
| 109560  | 75097   | 72824   | 42652      | 67913     | 0.67107437 | 0.51774067 |
| 4023600 | 2184600 | 2919100 | 2449175    | 2975725   | 0.28094534 | 0.51774067 |
| 30607   | 35078   | 230340  | 128026.275 | 78027.5   | -0.7143853 | 0.51774067 |
| 62605   | 78564   | 134260  | 64987.75   | 95567.25  | 0.5563485  | 0.52597936 |
| 82221   | 99682   | 102940  | 126422     | 89052.5   | -0.5055195 | 0.52992643 |
| 247710  | 222770  | 280050  | 170096.5   | 236082.5  | 0.47293765 | 0.53234969 |
| 4923600 | 3385700 | 3598600 | 5407000    | 4395825   | -0.2986944 | 0.53234969 |
| 25010   | 37326   | 34624   | 50228      | 30926.75  | -0.6996366 | 0.53234969 |
| 68682   | 71191   | 115200  | 116815.5   | 79186     | -0.5609144 | 0.53234969 |
| 89191   | 778200  | 691960  | 287520     | 424385.25 | 0.5617122  | 0.53234969 |
| 38575   | 39763   | 34626   | 61608.25   | 40046.75  | -0.6214384 | 0.53234969 |
| 1383600 | 1236600 | 1389800 | 1674100    | 1287500   | -0.3788133 | 0.53234969 |
| 49651   | 37574   | 55400   | 77150.25   | 52867.75  | -0.5452829 | 0.53234969 |
| 527200  | 548110  | 443570  | 619470     | 477725    | -0.374854  | 0.53234969 |
| 28628   | 20098   | 19102   | 36177.25   | 21017     | -0.783526  | 0.53234969 |
| 469960  | 569390  | 476030  | 405777.5   | 527835    | 0.37939815 | 0.53665561 |
| 35137   | 148010  | 135640  | 131607.75  | 93536.75  | -0.4926392 | 0.54019708 |
| 41642   | 25205   | 29419   | 48813      | 29941.25  | -0.705131  | 0.54019708 |
| 5060200 | 4284300 | 6575000 | 4377525    | 5233350   | 0.25761933 | 0.54243493 |
| 4727.8  | 19466   | 22032   | 14475.7    | 25791.45  | 0.83325977 | 0.54465455 |
| 1060500 | 1561500 | 1616600 | 1013232.5  | 1309145   | 0.36965964 | 0.54910965 |
| 145810  | 126270  | 147730  | 194220     | 150750    | -0.3655338 | 0.54910965 |
| 5291400 | 3309600 | 3753900 | 4902625    | 4105825   | -0.2558823 | 0.5534981  |
| 73691   | 201290  | 149100  | 75053      | 111580.25 | 0.57210004 | 0.5534981  |
| 222190  | 206160  | 234940  | 215815     | 278247.5  | 0.36657358 | 0.5534981  |
| 10148   | 89266   | 51079   | 61796.5    | 39623.225 | -0.6411788 | 0.5534981  |
| 231230  | 62552   | 53084   | 136479.25  | 95734     | -0.5115783 | 0.56425138 |
| 129790  | 140610  | 41597   | 86375.25   | 121041.75 | 0.48681486 | 0.56610641 |
| 205420  | 217430  | 234960  | 334205     | 253647.5  | -0.3979084 | 0.56992721 |
| 169990  | 183650  | 263750  | 148448.75  | 197335    | 0.41068191 | 0.57052043 |
| 77650   | 31135   | 35591   | 34360.1    | 51790.25  | 0.59194629 | 0.57223406 |
| 2898.8  | 3248.3  | 26517   | 15113.45   | 8526.725  | -0.8257694 | 0.57228264 |
| 345160  | 226600  | 231780  | 220120     | 277385    | 0.33359954 | 0.5751469  |
| 4910.6  | 1926.1  | 24267   | 18304.5    | 11067.175 | -0.7259114 | 0.5751469  |
| 392140  | 343690  | 389380  | 490000     | 388122.5  | -0.3362697 | 0.5751469  |

|          |          |          |           |           |            |            |
|----------|----------|----------|-----------|-----------|------------|------------|
| 22456    | 69217    | 31345    | 71034.5   | 47913.25  | -0.5680952 | 0.58516185 |
| 125620   | 60915    | 188260   | 86447.75  | 118152.25 | 0.45074678 | 0.58614132 |
| 34129    | 28481    | 25292    | 37274.75  | 22622.075 | -0.7204674 | 0.59950983 |
| 531350   | 365710   | 429380   | 559312.5  | 455002.5  | -0.2977801 | 0.60204954 |
| 47479    | 56101    | 51988    | 27524.8   | 42666     | 0.63235478 | 0.60204954 |
| 539620   | 798860   | 952110   | 919362.5  | 729155    | -0.3344083 | 0.60204954 |
| 69284    | 17251    | 30806    | 109767    | 173100.25 | 0.65716342 | 0.60204954 |
| 14891    | 7430.7   | 284520   | 44523.25  | 78741.375 | 0.822563   | 0.60204954 |
| 399430   | 104070   | 74748    | 217435    | 171582    | -0.341686  | 0.60276944 |
| 111990   | 106100   | 87786    | 129192.75 | 98586.5   | -0.3900631 | 0.6028222  |
| 11983    | 195580   | 71628    | 115422    | 81265.5   | -0.5062033 | 0.60306624 |
| 595510   | 612240   | 689700   | 526670    | 638285    | 0.27730146 | 0.60306624 |
| 1173000  | 2662000  | 2617600  | 1529700   | 1906825   | 0.3179237  | 0.604401   |
| 370680   | 464910   | 393720   | 427152.5  | 536305    | 0.32830248 | 0.6050543  |
| 143440   | 114020   | 270680   | 158169    | 203250    | 0.36178848 | 0.60557602 |
| 128710   | 24608    | 27094    | 88987.25  | 62565.25  | -0.5082371 | 0.60557602 |
| 920590   | 993190   | 1252600  | 1241275   | 1012035   | -0.2945636 | 0.6082242  |
| 99779    | 120570   | 95771    | 123486.5  | 89076.75  | -0.4712325 | 0.6082242  |
| 18204    | 33586    | 44608    | 17785.25  | 27776.75  | 0.64319655 | 0.60847938 |
| 15555    | 8675.9   | 45896    | 33389.375 | 20630.475 | -0.6946121 | 0.6094784  |
| 241540   | 224680   | 185050   | 251755    | 199382.5  | -0.3364816 | 0.61077583 |
| 120590   | 49129    | 83763    | 67236     | 92555.5   | 0.46108482 | 0.61228323 |
| 27801000 | 23237000 | 24740000 | 27468500  | 25440500  | -0.1106511 | 0.6143532  |
| 422350   | 383780   | 384650   | 327672.5  | 425075    | 0.37546281 | 0.62294659 |
| 1713200  | 5201000  | 22649000 | 10631925  | 7726375   | -0.4605392 | 0.62453407 |
| 207710   | 271570   | 270340   | 323444.75 | 249090    | -0.3768522 | 0.62468281 |
| 2273900  | 1473700  | 1922000  | 1555811   | 1931600   | 0.31212956 | 0.62468281 |
| 43747    | 100540   | 61578    | 89429.5   | 64018.5   | -0.4822619 | 0.62712389 |
| 31753    | 99082    | 58330    | 38253     | 54797.75  | 0.51854376 | 0.62977867 |
| 28688    | 27679    | 86575    | 58384.25  | 39415.25  | -0.5668253 | 0.63138221 |
| 34134    | 60880    | 49589    | 64265.075 | 42183.5   | -0.6073561 | 0.6396363  |
| 92186    | 5384.2   | 155590   | 62861.5   | 87611.55  | 0.47894438 | 0.64022124 |
| 463530   | 566250   | 523280   | 658127.5  | 532377.5  | -0.3059175 | 0.64042574 |
| 29506    | 16188    | 60736    | 19945.15  | 30010.25  | 0.58941736 | 0.64042574 |
| 127060   | 81502    | 286200   | 182935    | 142662    | -0.35873   | 0.64085076 |
| 354390   | 238890   | 356560   | 263282.5  | 326902.5  | 0.31224878 | 0.64219536 |
| 494320   | 243320   | 325600   | 295805    | 377655    | 0.35242245 | 0.64219536 |
| 84244    | 117320   | 105810   | 83019.5   | 111513.5  | 0.42569623 | 0.64219536 |
| 39877    | 64966    | 76302    | 66967     | 49370.5   | -0.4398011 | 0.64686155 |
| 14415    | 19940    | 29595    | 50094.75  | 35170.5   | -0.5102936 | 0.65647392 |
| 162940   | 162720   | 221430   | 140556.75 | 171640    | 0.28823307 | 0.65917148 |
| 130230   | 75860    | 96495    | 131907.5  | 106251.25 | -0.3120468 | 0.66130958 |

|          |          |          |           |           |            |            |
|----------|----------|----------|-----------|-----------|------------|------------|
| 115570   | 73203    | 30097    | 105395.25 | 78818.25  | -0.4192082 | 0.6684915  |
| 526640   | 489040   | 655690   | 356980    | 449517.5  | 0.33253403 | 0.67134534 |
| 14265000 | 13095000 | 16306000 | 11740750  | 13105300  | 0.15862581 | 0.678885   |
| 135670   | 109910   | 142970   | 169195    | 137892.5  | -0.2951429 | 0.678885   |
| 560560   | 792250   | 640660   | 425178.5  | 557162.5  | 0.39002951 | 0.68007913 |
| 51966    | 160350   | 123320   | 70310.25  | 92674.5   | 0.3984374  | 0.68460904 |
| 49801    | 77506    | 43779    | 69966.5   | 53587.25  | -0.3847745 | 0.68730519 |
| 60623    | 68907    | 45958    | 68935.25  | 50296.25  | -0.4547911 | 0.69523233 |
| 47238    | 55014    | 47248    | 85125.25  | 66317.5   | -0.3601975 | 0.69713593 |
| 29257    | 7368.7   | 79324    | 28026.75  | 39566.675 | 0.49748137 | 0.70390533 |
| 91866    | 131640   | 124700   | 140112.5  | 115724    | -0.2758976 | 0.70390533 |
| 135990   | 145970   | 230120   | 193325    | 163505    | -0.2416935 | 0.70390533 |
| 1821000  | 2082800  | 1637800  | 1742625   | 2011700   | 0.20715303 | 0.70515305 |
| 128360   | 137350   | 154900   | 162117.25 | 132337.5  | -0.2928157 | 0.70775837 |
| 227920   | 110040   | 185490   | 292137.5  | 238582.5  | -0.2921593 | 0.71034712 |
| 11137    | 62007    | 86545    | 60417.75  | 44721.5   | -0.4340039 | 0.7135678  |
| 213100   | 152930   | 266790   | 174047.5  | 206830    | 0.24896437 | 0.71385856 |
| 1820600  | 2868800  | 3169000  | 2838275   | 2439925   | -0.2181776 | 0.7165955  |
| 6610500  | 5197900  | 4545100  | 4996800   | 5672050   | 0.18286578 | 0.7165955  |
| 150850   | 122570   | 595390   | 354629    | 260937.5  | -0.4426062 | 0.7165955  |
| 58221    | 90511    | 50507    | 47273     | 62371     | 0.39985897 | 0.7165955  |
| 49951    | 95748    | 206000   | 139657.25 | 112377.5  | -0.3135373 | 0.71972612 |
| 20695    | 5236.7   | 55871    | 35418.75  | 24674.425 | -0.5214968 | 0.7242065  |
| 508890   | 1318600  | 1054600  | 1105772.5 | 942990    | -0.2297402 | 0.72628821 |
| 443890   | 259520   | 380040   | 435967.5  | 369392.5  | -0.239066  | 0.72733109 |
| 18909    | 60110    | 110420   | 67946     | 52159     | -0.3814724 | 0.72978943 |
| 137160   | 227250   | 376120   | 255007.5  | 216815    | -0.2340751 | 0.72978943 |
| 190500   | 208900   | 188260   | 214285    | 189120    | -0.1802289 | 0.72978943 |
| 631130   | 385930   | 427980   | 649527.5  | 520440    | -0.3196588 | 0.72978943 |
| 14080    | 15981    | 20570    | 11496.65  | 15560.5   | 0.43667488 | 0.73188272 |
| 130080   | 173350   | 93707    | 179007.5  | 151431.75 | -0.2413523 | 0.73188272 |
| 68619    | 176980   | 59998    | 112965.75 | 89362.5   | -0.338144  | 0.73188272 |
| 699460   | 745650   | 874550   | 656052.5  | 768757.5  | 0.22871731 | 0.73188272 |
| 742410   | 965840   | 1774700  | 1197385   | 1008297.5 | -0.2479657 | 0.73188272 |
| 187190   | 142340   | 139320   | 198392.5  | 172560    | -0.2012594 | 0.73188272 |
| 1551.1   | 4728.5   | 4168.5   | 5549.85   | 3316.35   | -0.7428525 | 0.73418007 |
| 11891    | 16479    | 7877.2   | 14583.075 | 10298.125 | -0.5019133 | 0.73574894 |
| 586150   | 1192800  | 1142900  | 753882.5  | 883690    | 0.22920068 | 0.73909551 |
| 166750   | 313030   | 380970   | 297392.5  | 245950    | -0.2740032 | 0.74093052 |
| 261680   | 392700   | 315300   | 373427.5  | 314115    | -0.2495353 | 0.74093052 |
| 146140   | 135720   | 147690   | 173715    | 147982.5  | -0.2312958 | 0.74971651 |
| 33437    | 16551    | 26004    | 29774.5   | 22432.5   | -0.4084869 | 0.75166806 |



|         |         |         |            |           |            |            |
|---------|---------|---------|------------|-----------|------------|------------|
| 208180  | 253120  | 252850  | 200982.5   | 229377.5  | 0.19065399 | 0.75166806 |
| 225310  | 373290  | 294850  | 244110     | 282770    | 0.21209767 | 0.75231527 |
| 73356   | 51436   | 30711   | 68049.75   | 53966.75  | -0.3345191 | 0.75429263 |
| 889340  | 639840  | 922900  | 1014697.5  | 880520    | -0.204622  | 0.75429263 |
| 149680  | 83434   | 186400  | 160340     | 135153.5  | -0.2465355 | 0.75429263 |
| 61840   | 43684   | 54423   | 44060.5    | 54812     | 0.31500591 | 0.75521077 |
| 206960  | 215690  | 403920  | 273535     | 231606.5  | -0.2400497 | 0.7568495  |
| 28478   | 82498   | 26394   | 50819.75   | 38673     | -0.3940626 | 0.7568495  |
| 27526   | 62159   | 53862   | 47346.25   | 59990.75  | 0.3414899  | 0.7568495  |
| 212160  | 187610  | 278090  | 170357.5   | 200137.5  | 0.23242605 | 0.75872685 |
| 73749   | 54300   | 44073   | 41671.5    | 54409     | 0.38478428 | 0.75872685 |
| 22479   | 54011   | 31649   | 23783.65   | 31263.25  | 0.39449763 | 0.75872685 |
| 26816   | 191200  | 103750  | 63309.425  | 85362.25  | 0.43117791 | 0.75872685 |
| 1955100 | 1847300 | 1818000 | 2146100    | 1920925   | -0.1599161 | 0.76003178 |
| 92115   | 9454.9  | 98587   | 56179.5    | 70527.225 | 0.32813649 | 0.7649752  |
| 1046100 | 1039900 | 628600  | 847750     | 971525    | 0.19661224 | 0.7649752  |
| 74398   | 81003   | 98540   | 59484.25   | 73206.75  | 0.29946895 | 0.7649752  |
| 45252   | 121160  | 102450  | 84962.5    | 70579.25  | -0.2675821 | 0.77990665 |
| 7790.3  | 20020   | 25362   | 13244.475  | 17658.575 | 0.41497827 | 0.78131546 |
| 659690  | 809140  | 715980  | 626762.5   | 709310    | 0.17849742 | 0.78131546 |
| 205850  | 360320  | 336710  | 241187.5   | 273215    | 0.17988155 | 0.78480575 |
| 15044   | 35613   | 27783   | 27903.9    | 20688.35  | -0.4316482 | 0.78767153 |
| 289700  | 214650  | 255750  | 294675     | 255382.5  | -0.206465  | 0.78767153 |
| 23324   | 17236   | 12365   | 22861.625  | 18018.25  | -0.3434691 | 0.78767153 |
| 110150  | 81536   | 84343   | 57677.75   | 71331.175 | 0.30651785 | 0.79027579 |
| 1559500 | 1295300 | 1356600 | 1294342.25 | 1081397.5 | -0.2593222 | 0.79105544 |
| 3357300 | 3522500 | 4154700 | 3265025    | 3528150   | 0.11181786 | 0.79295909 |
| 148810  | 128000  | 94722   | 145694.25  | 125888    | -0.2108032 | 0.79359233 |
| 231700  | 226430  | 198260  | 206642.5   | 229410    | 0.15079128 | 0.79371388 |
| 7995000 | 6476100 | 6203700 | 5945375    | 6544850   | 0.13859232 | 0.80168713 |
| 205370  | 138120  | 120880  | 155286.5   | 177445    | 0.19243951 | 0.80168713 |
| 856230  | 1504700 | 1353900 | 1204397.5  | 1046340   | -0.2029599 | 0.80168713 |
| 798320  | 681430  | 596840  | 807427.5   | 917097.5  | 0.1837424  | 0.80471847 |
| 132740  | 76542   | 40369   | 59731.25   | 71726     | 0.26401026 | 0.80989165 |
| 284870  | 183990  | 133450  | 179738     | 204967.5  | 0.18949972 | 0.81366374 |
| 14349   | 44670   | 42266   | 41806.525  | 32521     | -0.3623565 | 0.81366374 |
| 1322200 | 2135100 | 1994000 | 1974347.5  | 2214275   | 0.16545847 | 0.81507052 |
| 58198   | 133110  | 146880  | 77539.5    | 91990.25  | 0.24654953 | 0.81507052 |
| 42016   | 24276   | 63054   | 41041.25   | 33152.275 | -0.3079668 | 0.82049454 |
| 1036800 | 1825700 | 1863600 | 1637642.5  | 1470425   | -0.1553872 | 0.82310238 |
| 520790  | 295810  | 234020  | 588075     | 504230    | -0.2219182 | 0.83592121 |
| 75040   | 61586   | 70364   | 59660.75   | 68958     | 0.20893582 | 0.83592238 |

|         |         |         |           |           |            |            |
|---------|---------|---------|-----------|-----------|------------|------------|
| 42828   | 29666   | 204810  | 101904.5  | 86539.5   | -0.2357871 | 0.83610739 |
| 19233   | 33110   | 50532   | 34813.25  | 28752.25  | -0.2759616 | 0.83915383 |
| 39933   | 113640  | 106570  | 57031.75  | 66654.9   | 0.22494563 | 0.83915383 |
| 3518.4  | 6523.5  | 5191.6  | 4211.275  | 5651.65   | 0.42441504 | 0.83915383 |
| 66251   | 79162   | 50543   | 60502     | 70594.75  | 0.22257806 | 0.83915383 |
| 4267200 | 6228900 | 6354600 | 4777300   | 5160400   | 0.11128742 | 0.83915383 |
| 4981.7  | 20835   | 2963.6  | 5775.175  | 7592.325  | 0.39467709 | 0.84161719 |
| 427990  | 1607200 | 1406100 | 957168.75 | 1074382.5 | 0.16666251 | 0.84460131 |
| 3458200 | 3065200 | 3445900 | 3563350   | 3337675   | -0.0943907 | 0.84523846 |
| 29402   | 35316   | 33863   | 39536     | 32904.75  | -0.2648711 | 0.84590167 |
| 23390   | 9911.7  | 94637   | 45587.975 | 37489.425 | -0.2821696 | 0.84705955 |
| 396570  | 280770  | 314600  | 278256.25 | 324030    | 0.2197133  | 0.84705955 |
| 6685.4  | 3849.8  | 7017.8  | 12811.5   | 10490.25  | -0.2883903 | 0.85058226 |
| 115480  | 91796   | 103470  | 99130.75  | 87228.5   | -0.1845331 | 0.85914604 |
| 26794   | 21422   | 14504   | 27337.25  | 23089.5   | -0.2436312 | 0.86076502 |
| 657290  | 584370  | 571010  | 523512.5  | 566677.5  | 0.11430394 | 0.86466861 |
| 181260  | 278640  | 248140  | 285372.5  | 259152.5  | -0.139045  | 0.86466861 |
| 12036   | 14734   | 10037   | 12309.675 | 10347.775 | -0.2504721 | 0.86687632 |
| 175290  | 178030  | 148400  | 149478    | 165407.5  | 0.14609149 | 0.86687632 |
| 408970  | 249230  | 187680  | 261275    | 286655    | 0.13374636 | 0.86779921 |
| 88708   | 3795.2  | 15990   | 44008.5   | 37328.55  | -0.2375027 | 0.87785315 |
| 7730100 | 7674300 | 8955600 | 7453700   | 7950400   | 0.09307069 | 0.87950221 |
| 65892   | 86903   | 75902   | 76312.25  | 68280.5   | -0.160441  | 0.88758272 |
| 6115.4  | 10510   | 199560  | 68974.8   | 56159.075 | -0.2965502 | 0.88791917 |
| 42511   | 25827   | 23609   | 34697.5   | 29893     | -0.215024  | 0.88952993 |
| 17198   | 15010   | 157210  | 81147     | 71235     | -0.1879515 | 0.88952993 |
| 20538   | 23821   | 11767   | 20592.15  | 24050.5   | 0.22397242 | 0.88952993 |
| 9910.6  | 5948.4  | 2802.7  | 37738.5   | 31202.925 | -0.2743558 | 0.89037743 |
| 284160  | 283590  | 148670  | 226035    | 243375    | 0.1066348  | 0.89037743 |
| 411620  | 429750  | 459160  | 405977.5  | 436855    | 0.10575473 | 0.89308279 |
| 241520  | 278450  | 218780  | 234442.5  | 251647.5  | 0.10217014 | 0.89308279 |
| 8260.2  | 51714   | 5806.6  | 21503.075 | 18085     | -0.2497494 | 0.89308279 |
| 738350  | 508890  | 545240  | 759358    | 684047.5  | -0.1506837 | 0.89557985 |
| 10651   | 2829.7  | 83707   | 23014.5   | 26953.925 | 0.22795227 | 0.8968282  |
| 57527   | 110550  | 97310   | 86000.5   | 77537.25  | -0.1494555 | 0.8968282  |
| 318030  | 638610  | 1022200 | 667827.5  | 614150    | -0.1208844 | 0.8968282  |
| 13344   | 16094   | 8512.7  | 11583.175 | 9999.175  | -0.2121498 | 0.89836407 |
| 10332   | 15125   | 46104   | 30890.5   | 27113     | -0.1881785 | 0.89872779 |
| 887890  | 877970  | 909880  | 951727.5  | 896755    | -0.0858347 | 0.89872779 |
| 799560  | 716870  | 746850  | 903022.5  | 846170    | -0.0938144 | 0.90089361 |
| 16382   | 23026   | 177660  | 49290.425 | 57385.5   | 0.21937883 | 0.90316607 |
| 87445   | 216590  | 2418100 | 778610    | 866891.25 | 0.15495015 | 0.90316607 |

|         |         |          |            |           |            |            |
|---------|---------|----------|------------|-----------|------------|------------|
| 73252   | 79461   | 39328    | 57619.25   | 63810.75  | 0.14724861 | 0.91330672 |
| 67814   | 83699   | 76395    | 70731.25   | 78005.75  | 0.14123271 | 0.91330672 |
| 158360  | 29939   | 248600   | 165494.25  | 151912.25 | -0.1235429 | 0.91330672 |
| 374040  | 377840  | 402240   | 320712.5   | 343142.5  | 0.09752724 | 0.91381705 |
| 7799300 | 8916200 | 16123000 | 10681575   | 10224225  | -0.0631329 | 0.91659095 |
| 1459700 | 1147500 | 1313000  | 1490725    | 1410000   | -0.080319  | 0.91744003 |
| 19379   | 18459   | 17581    | 22056.875  | 24895.75  | 0.17467107 | 0.91754358 |
| 665600  | 472350  | 512190   | 591982.5   | 560265    | -0.0794452 | 0.91892154 |
| 47168   | 34562   | 29795    | 37068.9    | 42029.75  | 0.18120157 | 0.92597986 |
| 73589   | 115790  | 227940   | 119514.125 | 129125.75 | 0.11159559 | 0.92597986 |
| 721710  | 621500  | 690170   | 718387.5   | 682825    | -0.0732464 | 0.92992085 |
| 9950.8  | 21276   | 128140   | 41834.5    | 46339.2   | 0.14753995 | 0.93194091 |
| 48454   | 32213   | 153110   | 81559.425  | 74904     | -0.1228088 | 0.9402668  |
| 38895   | 37348   | 21607    | 22498.325  | 25048.975 | 0.15493397 | 0.9402668  |
| 529520  | 466720  | 554220   | 520522.5   | 500015    | -0.0579892 | 0.94759056 |
| 265960  | 355480  | 217310   | 235287.5   | 245327.5  | 0.06028428 | 0.94836768 |
| 263770  | 345400  | 478770   | 399532     | 375255    | -0.0904398 | 0.94836768 |
| 2142.1  | 18168   | 2802.7   | 6067.8275  | 6819.925  | 0.1685758  | 0.94836768 |
| 8506    | 67880   | 31945    | 29821.375  | 27402.4   | -0.1220445 | 0.94836768 |
| 17215   | 16731   | 16557    | 21593.95   | 23476     | 0.12055945 | 0.94836768 |
| 1435600 | 1458800 | 1200600  | 1447640    | 1510150   | 0.06098898 | 0.94836768 |
| 589100  | 672280  | 544100   | 592285     | 615877.5  | 0.05635187 | 0.94836768 |
| 239290  | 194560  | 243950   | 178185.5   | 185770.25 | 0.06013954 | 0.94836768 |
| 7769300 | 4665900 | 5568700  | 6115600    | 6322300   | 0.04795545 | 0.94836768 |
| 72275   | 6365.1  | 47685    | 60441      | 56658.775 | -0.0932281 | 0.94836768 |
| 25915   | 54014   | 23087    | 24488.375  | 26467.475 | 0.11212353 | 0.94836768 |
| 138970  | 177110  | 96348    | 122977     | 129709.5  | 0.07689563 | 0.94836768 |
| 45315   | 47011   | 78162    | 49850      | 46841.5   | -0.0898062 | 0.94836768 |
| 81083   | 11705   | 14439    | 25154.975  | 27593.575 | 0.13348863 | 0.94836768 |
| 24771   | 33043   | 260490   | 79856.75   | 86179.5   | 0.10993037 | 0.94836768 |
| 896640  | 1341000 | 1328600  | 1142275    | 1093462.5 | -0.0630063 | 0.94836768 |
| 8068.9  | 20920   | 2389.2   | 10812.95   | 9983.225  | -0.1151823 | 0.94836768 |
| 19318   | 11488   | 78263    | 28350.2    | 30668.5   | 0.11339869 | 0.94836768 |
| 57499   | 54219   | 40731    | 55824.5    | 52804.75  | -0.0802307 | 0.94887471 |
| 19634   | 22206   | 24226    | 16201.475  | 17380.5   | 0.10134442 | 0.94887471 |
| 50957   | 61513   | 59558    | 58086.575  | 54889.75  | -0.081668  | 0.94887471 |
| 178930  | 102620  | 25580    | 85826.25   | 80407.5   | -0.0940889 | 0.94887471 |
| 62558   | 107220  | 91570    | 70704.25   | 75307.75  | 0.0910014  | 0.9491759  |
| 44461   | 71235   | 68150    | 52636.5    | 55455     | 0.07525398 | 0.95132268 |
| 23683   | 14788   | 130340   | 51043.775  | 47983.75  | -0.0891891 | 0.95132268 |
| 9481.7  | 57057   | 71238    | 36299      | 38745.925 | 0.09411478 | 0.95132268 |
| 25746   | 29725   | 33014    | 27242.75   | 28780.25  | 0.07920678 | 0.95801075 |

|          |         |         |            |           |            |            |
|----------|---------|---------|------------|-----------|------------|------------|
| 630380   | 1307600 | 1093100 | 898970     | 923715    | 0.03917482 | 0.95828588 |
| 4598.7   | 6979.4  | 92803   | 24350.2    | 26163.185 | 0.10360456 | 0.95828588 |
| 352940   | 225830  | 246540  | 305205     | 317265    | 0.05590978 | 0.95828588 |
| 224070   | 222930  | 266250  | 219243     | 225022.5  | 0.03753848 | 0.95828588 |
| 115960   | 149720  | 102780  | 138738.5   | 134467.5  | -0.0451107 | 0.95828588 |
| 17192    | 34963   | 56085   | 45195      | 42985.5   | -0.0723131 | 0.95828588 |
| 62978    | 36824   | 44355   | 46615.825  | 48992.25  | 0.07173375 | 0.96137699 |
| 93595    | 58155   | 95342   | 73260      | 76112     | 0.05509823 | 0.96137699 |
| 134910   | 163310  | 194290  | 177401     | 172467.5  | -0.0406896 | 0.9614197  |
| 11045000 | 8370000 | 9967400 | 9911325    | 10068100  | 0.02264161 | 0.9620464  |
| 5506.1   | 11042   | 10160   | 10832.125  | 10310.525 | -0.0711985 | 0.9620464  |
| 4654800  | 3954700 | 4256000 | 4147575    | 4090525   | -0.0199821 | 0.9620464  |
| 67796    | 165060  | 100620  | 109924.5   | 106399.5  | -0.0470216 | 0.9620464  |
| 317120   | 213920  | 255250  | 257367.5   | 262932.5  | 0.03086259 | 0.9685757  |
| 11020000 | 5484100 | 5916100 | 6668775    | 6772600   | 0.02228802 | 0.98257668 |
| 54486    | 365640  | 249660  | 189910     | 193024    | 0.02346436 | 0.98267447 |
| 36732    | 43528   | 42001   | 38044.5    | 38983.75  | 0.03518497 | 0.98267447 |
| 2629400  | 1347900 | 1834100 | 1846000    | 1820900   | -0.0197509 | 0.98267447 |
| 160320   | 168540  | 125210  | 154957.75  | 152972.5  | -0.0186026 | 0.98629424 |
| 261660   | 179880  | 194330  | 202880     | 200610    | -0.0162331 | 0.98629424 |
| 12277    | 12504   | 190100  | 66576.55   | 64962     | -0.0354181 | 0.98629424 |
| 263870   | 310400  | 317850  | 266362.5   | 269160    | 0.01507304 | 0.98629424 |
| 5340100  | 4061100 | 3856000 | 4740150    | 4780950   | 0.0123646  | 0.98629424 |
| 1258100  | 627370  | 550990  | 784920     | 777832.5  | -0.0130861 | 0.98629424 |
| 6281.6   | 20961   | 5104.9  | 9825.85    | 9632.375  | -0.0286907 | 0.98629424 |
| 82884    | 99358   | 54016   | 86412.5    | 87517     | 0.01832326 | 0.98629424 |
| 10144    | 11228   | 38083   | 18513.025  | 18127     | -0.0304005 | 0.98629424 |
| 14029    | 28392   | 10919   | 16164      | 16431.5   | 0.02367993 | 0.98629424 |
| 4139900  | 4351600 | 3797900 | 4306650    | 4281875   | -0.0083234 | 0.98629424 |
| 111100   | 97898   | 50431   | 82533.85   | 81598.25  | -0.0164477 | 0.98661782 |
| 678270   | 448610  | 496040  | 560707.5   | 556845    | -0.0099726 | 0.98661782 |
| 581300   | 390840  | 278770  | 473302.5   | 470165    | -0.0095954 | 0.98682917 |
| 103620   | 48221   | 87355   | 151666     | 150666.5  | -0.009539  | 0.99137965 |
| 15404    | 16906   | 10519   | 12687.8    | 12762.625 | 0.00848316 | 0.99552324 |
| 165260   | 113750  | 126020  | 139901     | 140167.5  | 0.0027456  | 0.99560571 |
| 80336    | 22107   | 6726    | 28288.6875 | 28171.8   | -0.0059735 | 0.99560571 |
| 1957.3   | 4464.1  | 33244   | 11068.3    | 11024.7   | -0.0056943 | 0.99560571 |
