# Supplementary material
Source: PubMed Central journal article supplement (PMC6543812)
Supplement: NIHMS1026625-supplement-Supp_TableS4.pdf [file NIHMS1026625-supplement-Supp_TableS4.pdf]

| UniProt.Acce | Protein Name                           | P7 Mouse 1 | P7 Mouse 2 | P7 Mouse 3 | P7 Mouse 4 | P42 Mouse 1 |
|--------------|----------------------------------------|------------|------------|------------|------------|-------------|
| O08599       | Syntaxin-binding protein 1             | 0.21745636 | 0.27610189 | 0.19631954 | 0.21756426 | 0.02417838  |
| P63011       | Ras-related protein 1                  | 0.18603576 | 0.25909627 | 0.26393573 | 0.27852373 | 0.0248206   |
| Q9DBG3       | AP-2 complex subunit 1                 | 0.71892528 | 0.68561202 | 0.89180457 | 0.70180174 | 0.14083176  |
| Q99KB8       | Hydroxyacyl-CoA lyase                  | 0.37168058 | 0.3264017  | 0.3481754  | 0.37934884 | 0.10195791  |
| P68254       | 14-3-3 protein zeta                    | 0.70640601 | 0.46299759 | 0.53676687 | 0.45346467 | 0.06944901  |
| Q9D172       | ES1 protein                            | 0.25799158 | 0.27051771 | 0.26886398 | 0.27352956 | 0.09808559  |
| P17710       | Hexokinase-1                           | 0.33805793 | 0.32465842 | 0.33331923 | 0.32603606 | 0.11008049  |
| P09671       | Superoxide dismutase 1                 | 0.41107496 | 0.49192104 | 0.41787284 | 0.42422307 | 0.15552877  |
| P99029       | Peroxiredoxin 1                        | 0.25480655 | 0.27189056 | 0.27250342 | 0.24219688 | 0.10284291  |
| Q9Z2I9       | Succinate-CoA lyase                    | 0.2498485  | 0.27766901 | 0.25745241 | 0.24936606 | 0.10190323  |
| Q91WC3       | Long-chain fatty acyl-CoA synthetase 1 | 0.25043165 | 0.29667921 | 0.28881692 | 0.32620488 | 0.11958868  |
| Q9CQR4       | Acyl-coenzyme A oxidase 1              | 0.77888854 | 0.71575186 | 0.86602369 | 0.75447919 | 0.22798959  |
| Q8R164       | Valacyclovir resistance protein 1      | 0.29236537 | 0.29563078 | 0.35280314 | 0.2934663  | 0.12985923  |
| P63101       | 14-3-3 protein eta                     | 0.41260551 | 0.48144354 | 0.3881657  | 0.48619925 | 0.18543813  |
| Q8BMF4       | Dihydrolipoyl succinyltransferase 2    | 0.4350027  | 0.47193397 | 0.43357377 | 0.42352596 | 0.18532364  |
| Q9DCT2       | NADH dehydrogenase 1                   | 0.22223161 | 0.22574307 | 0.21533763 | 0.20351951 | 0.09765978  |
| P70404       | Isocitrate dehydrogenase 1             | 0.42478922 | 0.42597755 | 0.38014902 | 0.40965337 | 0.171488    |
| Q9CQE1       | Protein NipS1                          | 0.20179901 | 0.17641455 | 0.16252475 | 0.14806304 | 0.38803761  |
| D3Z7P3       | Glutaminase                            | 0.38336534 | 0.38854901 | 0.37229625 | 0.37705926 | 0.17275605  |
| Q8R4N0       | Citrate lyase                          | 0.4595166  | 0.46249248 | 0.43611083 | 0.48390961 | 0.21214387  |
| Q8K3J1       | NADH dehydrogenase 2                   | 0.24081074 | 0.2278951  | 0.16689383 | 0.26666824 | 0.10679074  |
| P85094       | Isochorismatase                        | 0.54542694 | 0.75670232 | 0.76171536 | 0.53372945 | 0.18649512  |
| Q9DC69       | NADH dehydrogenase 3                   | 0.2231432  | 0.2214898  | 0.22036683 | 0.21128769 | 0.1199304   |
| Q9CR61       | NADH dehydrogenase 4                   | 0.16678643 | 0.13951265 | 0.13420412 | 0.18777553 | 0.03225497  |
| P03921       | NADH-ubiquinone oxidoreductase 1       | 0.18934242 | 0.18209891 | 0.18622256 | 0.18816698 | 0.10659027  |
| P05202       | Aspartate aminotransferase 1           | 0.68565032 | 0.69641118 | 0.65189313 | 0.68418225 | 0.30117819  |
| Q9JKC6       | Cell cycle exit protein 1              | 0.12016696 | 0.12750272 | 0.12454095 | 0.12804521 | 0.04973685  |
| P35486       | Pyruvate dehydrogenase E1              | 0.30288244 | 0.3082994  | 0.28587706 | 0.27645937 | 0.14380977  |
| Q9DCJ5       | NADH dehydrogenase 5                   | 0.17723312 | 0.17998078 | 0.20014394 | 0.16272521 | 0.09335804  |
| Q68FD5       | Clathrin heavy chain 1                 | 0.41133377 | 0.71999806 | 0.44259045 | 0.46916051 | 0.06192103  |
| Q9CQJ8       | NADH dehydrogenase 6                   | 0.15713098 | 0.18318516 | 0.16633315 | 0.18085109 | 0.08790545  |
| Q9JLZ3       | Methylglutamate kinase                 | 0.13366712 | 0.13947504 | 0.1487113  | 0.13282983 | 0.06246428  |
| Q99KI0       | Aconitate hydratase                    | 0.38478165 | 0.40648323 | 0.39612287 | 0.38205275 | 0.18996632  |
| Q62425       | Cytochrome b5                          | 0.19072792 | 0.20242563 | 0.19711973 | 0.19911192 | 0.11367134  |
| Q9CQZ5       | NADH dehydrogenase 7                   | 0.18648152 | 0.18814484 | 0.18931514 | 0.17739129 | 0.10827097  |
| Q91VD9       | NADH-ubiquinone oxidoreductase 2       | 0.18382944 | 0.19118164 | 0.18906515 | 0.18345549 | 0.10871388  |
| Q9CPP6       | NADH dehydrogenase 8                   | 0.21514025 | 0.21437636 | 0.21841196 | 0.23435224 | 0.12906502  |
| Q9CQH3       | NADH dehydrogenase 9                   | 0.22331667 | 0.27151058 | 0.26632309 | 0.22747387 | 0.11904931  |
| Q99L13       | 3-hydroxyisovaleryl-CoA synthase       | 0.70197853 | 0.630671   | 0.73893595 | 0.65880078 | 0.34287705  |
| Q9CQC7       | NADH dehydrogenase 10                  | 0.16403235 | 0.17931883 | 0.17239986 | 0.16841412 | 0.0876694   |
| Q99J99       | 3-mercaptopyruvate sulfurtransferase   | 0.19906195 | 0.2194809  | 0.20718119 | 0.20521861 | 0.33458817  |

|        |                |            |            |            |            |            |
|--------|----------------|------------|------------|------------|------------|------------|
| Q9D6R2 | Isocitrate del | 0.32160263 | 0.33137515 | 0.31887638 | 0.2829558  | 0.15924903 |
| Q9Z1P6 | NADH dehyd     | 0.16625683 | 0.16464933 | 0.17666727 | 0.16573877 | 0.08587322 |
| Q91YT0 | NADH dehyd     | 0.19725984 | 0.19462735 | 0.20041848 | 0.18585041 | 0.12466389 |
| O09111 | NADH dehyd     | 0.20841729 | 0.25077558 | 0.2464497  | 0.21883519 | 0.12428405 |
| Q8BTX9 | Inactive hydr  | 0.18764262 | 0.2169282  | 0.18110423 | 0.17933511 | 0.31793802 |
| Q7TMF3 | NADH dehyd     | 0.16263508 | 0.15852794 | 0.16668757 | 0.16361438 | 0.08116473 |
| Q9CR62 | Mitochondri    | 0.44250369 | 0.40017788 | 0.37612395 | 0.39907918 | 0.23647844 |
| Q9CQ75 | NADH dehyd     | 0.20853111 | 0.23233476 | 0.22059278 | 0.2081486  | 0.12095346 |
| Q8BH59 | Calcium-bind   | 0.27344806 | 0.29699725 | 0.273995   | 0.27452953 | 0.15426291 |
| Q8BKZ9 | Pyruvate del   | 0.329929   | 0.33652026 | 0.31392712 | 0.35252559 | 0.15981727 |
| Q9DCS9 | NADH dehyd     | 0.20932338 | 0.20019349 | 0.21843511 | 0.21395928 | 0.12599751 |
| Q9CQZ6 | NADH dehyd     | 0.17227401 | 0.18660436 | 0.17093244 | 0.16921291 | 0.09895059 |
| Q9D6J5 | NADH dehyd     | 0.15703061 | 0.17172692 | 0.1587137  | 0.16731826 | 0.08751471 |
| Q9CPQ1 | Cytochrome     | 0.20673867 | 0.21597291 | 0.21489297 | 0.20856736 | 0.11964296 |
| Q8QZS1 | 3-hydroxyiso   | 0.64741382 | 0.77790181 | 0.62927603 | 0.60405674 | 0.33179506 |
| P08249 | Malate dehyd   | 0.36643069 | 0.39149478 | 0.38319193 | 0.36302401 | 0.20573753 |
| Q9CQ69 | Cytochrome     | 0.34668378 | 0.38912345 | 0.37551525 | 0.37971821 | 0.20493268 |
| P62259 | 14-3-3 protei  | 0.38561547 | 0.32892802 | 0.49008722 | 0.34338175 | 0.12885073 |
| Q91WD5 | NADH dehyd     | 0.21439983 | 0.23885125 | 0.22076872 | 0.21550406 | 0.13127558 |
| Q9D051 | Pyruvate del   | 0.31694454 | 0.33744175 | 0.3263128  | 0.30855561 | 0.1648851  |
| P19536 | Cytochrome     | 0.20930165 | 0.22376167 | 0.21795466 | 0.202852   | 0.13038129 |
| O08749 | Dihydrolipoy   | 0.41005352 | 0.43148801 | 0.46421598 | 0.41410124 | 0.2472166  |
| Q9DC70 | NADH dehyd     | 0.15550207 | 0.19726994 | 0.19760157 | 0.17891095 | 0.11433768 |
| Q9CQ54 | NADH dehyd     | 0.15032522 | 0.18259786 | 0.16555128 | 0.15729999 | 0.08279273 |
| O55126 | Protein NipSi  | 0.36580119 | 0.37158466 | 0.34816956 | 0.37976974 | 0.20976123 |
| Q3UUI3 | Acyl-coenzyn   | 0.13713605 | 0.11866286 | 0.08930007 | 0.11664223 | 0.05500234 |
| Q60930 | Voltage-depe   | 0.75360989 | 0.76755342 | 0.75493346 | 0.75703736 | 0.39240635 |
| Q9ERS2 | NADH dehyd     | 0.19931127 | 0.26215282 | 0.23606804 | 0.19990523 | 0.11979821 |
| Q60932 | Voltage-depe   | 0.57670317 | 0.64877875 | 0.57771665 | 0.54262741 | 0.30031079 |
| P19783 | Cytochrome     | 0.21927214 | 0.23440477 | 0.22773714 | 0.21597547 | 0.1332195  |
| P97450 | ATP synthase   | 0.4455707  | 0.46072331 | 0.43332226 | 0.4215374  | 0.25604645 |
| Q9D3P8 | Plasminogen    | 0.36994194 | 0.42181053 | 0.38033831 | 0.3970074  | 0.82894237 |
| Q9CR21 | Acyl carrier p | 0.28988604 | 0.26000385 | 0.2675778  | 0.22195958 | 0.16439073 |
| Q9CXZ1 | NADH dehyd     | 0.14074874 | 0.17463249 | 0.20487618 | 0.20504244 | 0.10424005 |
| P48962 | ADP/ATP tra    | 0.37429879 | 0.37723484 | 0.35773283 | 0.317755   | 0.18974071 |
| Q9WUM5 | Succinate--Cr  | 0.46122001 | 0.48339575 | 0.55816767 | 0.48448107 | 0.20696601 |
| Q9D6J6 | NADH dehyd     | 0.22177181 | 0.21474206 | 0.20177562 | 0.19482122 | 0.13273855 |
| Q9DB77 | Cytochrome     | 0.31722195 | 0.34070407 | 0.33507532 | 0.32384002 | 0.1793389  |
| Q9CPX8 | Cytochrome     | 0.43387909 | 0.33543754 | 0.32712751 | 0.30019432 | 0.18181471 |
| Q64521 | Glycerol-3-ph  | 0.25142106 | 0.25235368 | 0.24639238 | 0.23692426 | 0.15034394 |
| Q91V61 | Sideroflexin-  | 0.13812894 | 0.15064652 | 0.14081517 | 0.14086337 | 0.08003565 |
| Q9DCZ4 | MICOS comp     | 0.3774701  | 0.40083927 | 0.4316458  | 0.37694349 | 0.22823799 |

|        |                |            |            |            |            |            |
|--------|----------------|------------|------------|------------|------------|------------|
| Q9DCX2 | ATP synthase   | 0.43142446 | 0.49345165 | 0.42859739 | 0.41869566 | 0.26610176 |
| Q80VL1 | Tudor and Kf   | 0.28472147 | 0.26739517 | 0.36753256 | 0.37065113 | 0.98638286 |
| Q3UIU2 | NADH dehyd     | 0.19319235 | 0.15175518 | 0.18812254 | 0.20420209 | 0.10337091 |
| Q91WS0 | CDGSH iron-s   | 0.61333468 | 0.68362194 | 0.5918507  | 0.52785333 | 0.31769941 |
| Q9WUR9 | Adenylate ki   | 1.45986495 | 0.52000409 | 1.06885221 | 0.71650073 | 0.1697514  |
| Q06185 | ATP synthase   | 0.44802033 | 0.45279258 | 0.43162087 | 0.4282281  | 0.26779468 |
| Q9D0S9 | Histidine tria | 0.66017802 | 0.81069822 | 0.73886005 | 0.80165355 | 0.43697608 |
| Q9CR68 | Cytochrome     | 0.31922563 | 0.33681206 | 0.33978286 | 0.31664249 | 0.18875745 |
| Q9CZ13 | Cytochrome     | 0.33382661 | 0.37533066 | 0.34476169 | 0.33876883 | 0.20308665 |
| P32020 | Non-specific   | 0.57531146 | 0.36036842 | 0.42331357 | 0.45739884 | 1.19317797 |
| Q9CPV4 | Glyoxalase di  | 0.38990301 | 0.38713046 | 0.7052778  | 0.49049839 | 0.13995906 |
| P12787 | Cytochrome     | 0.21064219 | 0.20308783 | 0.20366806 | 0.19995975 | 0.12319842 |
| O35459 | Delta(3,5)-De  | 0.3214922  | 0.30520004 | 0.30645353 | 0.33248096 | 0.62067645 |
| P56480 | ATP synthase   | 0.45490922 | 0.4817385  | 0.46980423 | 0.44333213 | 0.27226177 |
| Q8K1Z0 | Ubiquinone k   | 1.01504269 | 1.06435954 | 1.06287331 | 1.01119694 | 0.42861216 |
| Q91YP2 | Neurolysin, r  | 0.18224771 | 0.20883516 | 0.15157521 | 0.1703504  | 0.34331911 |
| Q9CZS1 | Aldehyde del   | 0.29023326 | 0.29011635 | 0.2839274  | 0.28918185 | 0.4681772  |
| P56379 | 6.8 kDa mito   | 0.3245422  | 0.36118491 | 0.34594235 | 0.32892435 | 0.19919424 |
| P48771 | Cytochrome     | 0.18019184 | 0.1838781  | 0.18241671 | 0.16998161 | 0.11155605 |
| Q9D6M3 | Mitochondri    | 0.11001123 | 0.0950728  | 0.10889846 | 0.10559317 | 0.0497011  |
| P00405 | Cytochrome     | 0.20171514 | 0.21162817 | 0.2045339  | 0.19102271 | 0.12417362 |
| Q99LY9 | NADH dehyd     | 0.12723613 | 0.13933716 | 0.14046816 | 0.1477893  | 0.07966973 |
| Q99LC3 | NADH dehyd     | 0.15285881 | 0.1531503  | 0.15567866 | 0.15785247 | 0.09851524 |
| Q9D855 | Cytochrome     | 0.30476246 | 0.30622293 | 0.34855081 | 0.34263922 | 0.2069788  |
| P08228 | Superoxide d   | 0.76288141 | 0.66777998 | 0.60254594 | 0.37846596 | 0.26310387 |
| Q9CQQ7 | ATP synthase   | 0.44144395 | 0.49128577 | 0.49821268 | 0.4741533  | 0.26692674 |
| Q3TC33 | Coiled-coil dc | 0.70627489 | 0.77532855 | 0.60905584 | 0.83507804 | 0.34111316 |
| Q03265 | ATP synthase   | 0.46808889 | 0.47839362 | 0.47264129 | 0.44052283 | 0.26876841 |
| Q9Z1J3 | Cysteine des   | 0.41551622 | 0.31665496 | 0.49542533 | 0.5620475  | 0.26689713 |
| Q91VR2 | ATP synthase   | 0.45899492 | 0.50252071 | 0.51179757 | 0.45839859 | 0.2796375  |
| Q8VEM8 | Phosphate ca   | 0.54160574 | 0.58783016 | 0.57164847 | 0.5602112  | 0.32916382 |
| Q9DB20 | ATP synthase   | 0.46139646 | 0.47570211 | 0.47301626 | 0.44813358 | 0.28574243 |
| Q9D0M3 | Cytochrome     | 0.45347856 | 0.48150623 | 0.46209356 | 0.43216386 | 0.27952936 |
| Q9D3D9 | ATP synthase   | 0.45453499 | 0.47481622 | 0.51022008 | 0.47653689 | 0.27853079 |
| Q8BX10 | Serine/threo   | 0.30036425 | 0.29549423 | 0.28249976 | 0.28856492 | 0.40916304 |
| Q9EQ20 | Methylmalor    | 0.12922829 | 0.12327476 | 0.12766064 | 0.14676662 | 0.08191856 |
| P56135 | ATP synthase   | 0.46578058 | 0.49963438 | 0.48072882 | 0.46217485 | 0.27844583 |
| Q9CQX8 | 28S ribosomi   | 0.5031297  | 0.567413   | 0.58012081 | 0.60117849 | 0.32075755 |
| P51881 | ADP/ATP tra    | 0.51155824 | 0.59135924 | 0.56381775 | 0.55100025 | 0.33278909 |
| P24270 | Catalase OS=   | 0.61801002 | 0.56661096 | 0.48503154 | 0.65519975 | 1.98197118 |
| Q3KNM2 | E3 ubiquitin-  | 0.36943167 | 0.37235306 | 0.42239582 | 0.39325147 | 0.53673271 |
| Q78IK2 | Up-regulatec   | 0.36908607 | 0.37085435 | 0.38185711 | 0.35420708 | 0.241424   |

|        |                |            |            |            |            |            |
|--------|----------------|------------|------------|------------|------------|------------|
| P58281 | Dynamamin-like | 0.23332444 | 0.25879404 | 0.23918168 | 0.24086763 | 0.14934162 |
| Q8R404 | MICOS comp     | 0.5750978  | 0.66786836 | 0.60963197 | 0.62743689 | 0.3946224  |
| P35700 | Peroxiredoxi   | 0.78778927 | 1.16549799 | 0.93462614 | 1.13393555 | 0.48875805 |
| P52480 | Pyruvate kin   | 2.30412794 | 1.16362666 | 1.75646207 | 1.46270218 | 0.39087494 |
| Q9CPQ8 | ATP synthase   | 0.48021517 | 1.08099947 | 0.54946223 | 0.45380576 | 0.2479145  |
| P17751 | Triosephosph   | 1.94795941 | 2.28825262 | 2.99878805 | 2.17110446 | 0.28815967 |
| Q5HZI9 | Solute carri   | 0.26107492 | 0.30196577 | 0.28087965 | 0.22656251 | 0.21443123 |
| Q9CYH2 | Redox-regula   | 0.4452725  | 0.49277239 | 0.48107195 | 0.56026582 | 0.26379877 |
| Q8JZQ2 | AFG3-like pro  | 0.68701101 | 0.78697403 | 0.60571868 | 0.68406629 | 0.47915594 |
| Q3UJU9 | Regulator of   | 0.90834808 | 1.05362428 | 1.58169124 | 1.13304105 | 0.45485159 |
| P62897 | Cytochrome     | 0.32199522 | 0.35052315 | 0.34422988 | 0.32764185 | 0.26563953 |
| Q91ZA3 | Propionyl-Co   | 0.34908764 | 0.39121241 | 0.41420731 | 0.44110019 | 0.27196852 |
| P14152 | Malate dehy    | 1.73322569 | 0.5428178  | 0.55303819 | 0.57190272 | 0.11405106 |
| Q8CI78 | Required for   | 0.69956417 | 0.73718789 | 0.76663672 | 0.58580703 | 0.43537534 |
| P56382 | ATP synthase   | 0.48265467 | 0.4811725  | 0.46570214 | 0.44157666 | 0.27352392 |
| P29758 | Ornithine arr  | 0.42648122 | 0.4790487  | 0.4564043  | 0.43567914 | 0.72013911 |
| Q99MN9 | Propionyl-Co   | 0.31708233 | 0.34949865 | 0.32989245 | 0.32079495 | 0.22878423 |
| Q8BHF7 | CDP-diacylgly  | 0.94976223 | 0.48132323 | 0.5194702  | 1.08159552 | 0.34382146 |
| P97807 | Fumarate hy    | 0.47938341 | 0.51670788 | 0.50570577 | 0.48435942 | 0.29755951 |
| Q8JZU2 | Tricarboxylat  | 0.36655178 | 0.37581646 | 0.3308715  | 0.32226565 | 0.48859654 |
| Q91VN4 | MICOS comp     | 0.31279344 | 0.35080595 | 0.33398329 | 0.36300221 | 0.23228792 |
| Q8BGH2 | Sorting and a  | 0.61828208 | 0.71896939 | 0.68655311 | 0.75719277 | 0.46048839 |
| Q9CRB8 | Mitochondri    | 0.43060424 | 0.13540391 | 0.18461163 | 0.35948408 | 0.12976023 |
| Q9D0L7 | Armadillo rej  | 0.5274404  | 0.80194921 | 0.5717067  | 0.50872372 | 1.0140029  |
| Q6PB66 | Leucine-rich   | 0.56315224 | 0.5834904  | 0.58108228 | 0.54778729 | 0.95708227 |
| Q8CEE7 | Retinol dehy   | 0.37782785 | 0.50715443 | 0.33913479 | 0.39034888 | 0.59629744 |
| P17182 | Alpha-enolas   | 2.72017394 | 2.08346118 | 1.97747371 | 2.55539566 | 0.56317091 |
| Q3UV70 | [Pyruvate de   | 0.23128617 | 0.18152905 | 0.19049203 | 0.21901753 | 0.09744891 |
| O55125 | Protein NipSi  | 0.34542051 | 0.35402079 | 0.41937536 | 0.29690502 | 0.21086302 |
| Q791V5 | Mitochondri    | 0.47183043 | 0.50339106 | 0.47810763 | 0.50691868 | 0.32180505 |
| P09411 | Phosphoglyc    | 2.44357421 | 2.52986043 | 1.14600041 | 2.42352943 | 0.39770445 |
| Q8BIJ6 | Isoleucine--tl | 0.54707758 | 0.57712346 | 0.88400292 | 0.69107219 | 0.41112842 |
| P16858 | Glyceraldehy   | 2.89334325 | 2.7955627  | 2.66837486 | 2.55452731 | 0.53174436 |
| Q8K0Z7 | Translational  | 0.45631634 | 0.4746757  | 0.34727066 | 0.39998181 | 0.352029   |
| P56391 | Cytochrome     | 0.18369125 | 0.20639066 | 0.18786423 | 0.10605281 | 0.10560708 |
| Q9D8P4 | 39S ribosom    | 0.82492651 | 0.27581769 | 0.69300274 | 1.00265198 | 2.2726701  |
| Q8BHC4 | Dephospho-(    | 1.42762284 | 1.39415212 | 1.17150038 | 1.36966374 | 5.20418559 |
| O88441 | Metaxin-2 O'   | 0.60140074 | 0.63847811 | 0.61927134 | 0.85137948 | 0.44613658 |
| Q9CQ91 | NADH dehyd     | 0.20616514 | 0.06844036 | 0.11419181 | 0.11221588 | 0.05590646 |
| Q4VAE3 | Transmembr     | 0.12116702 | 0.08737221 | 0.11955077 | 0.08944714 | 0.05987921 |
| Q9CZW5 | Mitochondri    | 0.72490035 | 0.71648808 | 0.72864353 | 0.70227894 | 0.50059025 |
| Q9CWE0 | Mitochondri    | 0.46121494 | 0.35221173 | 0.53138179 | 0.43128411 | 0.33095908 |

|        |               |            |            |            |            |            |
|--------|---------------|------------|------------|------------|------------|------------|
| P20108 | Thioredoxin-  | 0.59708744 | 0.60989111 | 0.61535819 | 0.5964741  | 0.41799057 |
| Q9D8T7 | SRA stem-loc  | 0.58612933 | 0.64722194 | 0.57172101 | 0.58041079 | 0.82879793 |
| P45952 | Medium-cha    | 0.25021859 | 0.3012018  | 0.24166257 | 0.27814279 | 0.33463955 |
| P42125 | Enoyl-CoA de  | 0.76525201 | 0.78932071 | 0.73445718 | 0.75939737 | 0.49646169 |
| Q91VM9 | Inorganic pyr | 0.30491272 | 0.58571817 | 0.48422235 | 0.61543159 | 0.20994698 |
| P22315 | Ferrochelata  | 0.48075385 | 0.40699953 | 0.45687635 | 0.50876897 | 0.33203618 |
| Q14C51 | Pentatricope  | 0.7293035  | 0.76937416 | 0.75753839 | 0.80650294 | 1.18547541 |
| Q505D7 | Optic atroph  | 0.2908044  | 0.31046597 | 0.45579257 | 0.24000629 | 0.16902703 |
| Q9Z2Q5 | 39S ribosoma  | 0.84381734 | 0.68496961 | 0.67644564 | 0.72054463 | 1.38277479 |
| Q61102 | ATP-binding   | 0.7164819  | 1.04665862 | 0.85522957 | 0.83378501 | 0.47850298 |
| Q9Z2I0 | Mitochondria  | 0.46469461 | 0.48946386 | 0.45570635 | 0.45877499 | 0.33144212 |
| Q9D6K8 | FUN14 doma    | 0.76935771 | 1.27218556 | 1.39203072 | 0.86771894 | 0.42338271 |
| Q9CZP5 | Mitochondria  | 1.0111509  | 0.83160566 | 0.84269185 | 0.72380079 | 0.49409881 |
| P55096 | ATP-binding   | 1.00014095 | 1.57089157 | 1.40385861 | 0.76356577 | 2.56142934 |
| Q9CQA3 | Succinate de  | 0.43099032 | 0.47658946 | 0.43718575 | 0.43543494 | 0.33448064 |
| Q9Z0V7 | Mitochondria  | 0.51487708 | 0.52718146 | 0.67357333 | 0.74938474 | 1.59491037 |
| Q91YP0 | L-2-hydroxyg  | 0.71321796 | 0.97605955 | 0.87840494 | 1.13332322 | 0.50107409 |
| Q8BJZ4 | 28S ribosoma  | 0.73338332 | 0.97333526 | 0.72739082 | 0.80645701 | 1.73619627 |
| P30275 | Creatine kin  | 0.03876499 | 0.04630914 | 0.03962136 | 0.03408506 | 0.00976759 |
| Q9CXJ4 | ATP-binding   | 0.4807788  | 0.37760785 | 0.33249522 | 0.34860362 | 0.29965115 |
| Q811U4 | Mitofusin-1   | 0.38784685 | 0.31289421 | 0.34623618 | 0.41772715 | 0.79879957 |
| Q9CZU6 | Citrate synth | 0.3524782  | 0.34807686 | 0.34005427 | 0.32978403 | 0.23130532 |
| Q60597 | 2-oxoglutar   | 0.47494983 | 0.48208112 | 0.45772156 | 0.44627778 | 0.33834593 |
| Q922W5 | Pyrroline-5-c | 2.31946025 | 1.95671682 | 0.96040469 | 1.77625988 | 5.58829297 |
| Q9D0G0 | 28S ribosoma  | 0.74609167 | 0.48503717 | 0.48229638 | 0.60727129 | 0.89834895 |
| P50516 | V-type proto  | 0.5268435  | 3.83371685 | 0.66753466 | 1.05787118 | 0.07176834 |
| Q9CQV7 | Mitochondria  | 0.73338632 | 0.62260347 | 0.63477012 | 0.71323712 | 1.23040223 |
| Q2TPA8 | Hydroxysterc  | 0.16917896 | 0.17740324 | 0.19498336 | 0.20260777 | 0.17715754 |
| Q8BU88 | 39S ribosoma  | 0.66561834 | 0.67757545 | 0.65190871 | 0.69678499 | 1.10868226 |
| Q8BGC4 | Prostaglandin | 0.46201641 | 2.08982637 | 0.93585641 | 1.1086672  | 0.49969897 |
| Q9D6K5 | Synaptojanin  | 1.54973738 | 1.45542473 | 1.07529964 | 1.16825614 | 0.5565059  |
| Q8K009 | Mitochondria  | 1.99510964 | 1.67885038 | 1.64130889 | 1.67186983 | 4.48724617 |
| Q5M8N4 | Epimerase fa  | 0.13926586 | 0.09590103 | 0.09272454 | 0.14307934 | 0.17632611 |
| Q9EP89 | Serine beta-l | 0.1894868  | 0.20485592 | 0.21274633 | 0.18380903 | 0.13938764 |
| Q8BIG7 | Catechol O-n  | 0.6210885  | 0.79015869 | 0.97155869 | 0.79308807 | 0.56131242 |
| Q9D1N9 | 39S ribosoma  | 0.81850442 | 0.74480325 | 0.75983588 | 0.70909731 | 1.76787499 |
| Q9D338 | 39S ribosoma  | 0.75863264 | 0.95872794 | 0.84340664 | 0.84648177 | 1.29558279 |
| Q9ER88 | 28S ribosoma  | 0.73156192 | 0.68636096 | 0.66143532 | 0.72749574 | 1.17196059 |
| Q8BGA9 | Mitochondria  | 0.65800458 | 0.65787651 | 0.54834672 | 0.6870974  | 0.99916744 |
| Q9D2G2 | Dihydrolipoy  | 0.49078394 | 0.54149904 | 0.54389171 | 0.45825421 | 0.3231553  |
| Q922B1 | O-acetyl-ADF  | 1.41090289 | 0.67896047 | 2.73032092 | 0.83634266 | 0.4160767  |
| O88967 | ATP-depende   | 0.67039304 | 0.64385711 | 0.78527548 | 0.83411612 | 1.11242345 |

|        |                |            |            |            |            |            |
|--------|----------------|------------|------------|------------|------------|------------|
| Q8VDT9 | 39S ribosom    | 0.1055274  | 0.2221163  | 0.06325379 | 0.20535645 | 0.41041724 |
| Q99N96 | 39S ribosom    | 0.98036877 | 0.84973075 | 0.68088171 | 1.21920155 | 1.56796333 |
| Q8K215 | LYR motif-co   | 0.43887496 | 0.71817817 | 0.48514688 | 0.40540431 | 0.30700152 |
| Q8BK72 | 28S ribosom    | 0.83468107 | 0.90141537 | 0.79331618 | 0.83166841 | 1.27630734 |
| Q922H2 | [Pyruvate de   | 0.40781699 | 0.23408372 | 0.24502599 | 0.49918546 | 0.14949084 |
| Q9D1I6 | 39S ribosom    | 0.9816176  | 0.86329899 | 1.04060816 | 0.86749526 | 1.75176243 |
| Q9WTQ8 | Mitochondri    | 0.90717592 | 0.90023824 | 0.89966835 | 0.98376271 | 2.06174769 |
| Q99N92 | 39S ribosom    | 0.68538157 | 0.56194512 | 0.43668317 | 0.63444956 | 0.68814843 |
| Q99JR1 | Sideroflexin-  | 0.39921021 | 0.42222274 | 0.40188845 | 0.37285997 | 0.49884653 |
| Q9JHS4 | ATP-depende    | 0.62850955 | 0.6208793  | 0.64121614 | 0.66563052 | 0.9248962  |
| P59017 | Bcl-2-like prc | 0.48643938 | 0.46669494 | 0.50576249 | 0.60305662 | 0.74231511 |
| Q9D1G1 | Ras-related p  | 2.59791884 | 4.1059134  | 3.43829684 | 3.2712906  | 1.20415474 |
| Q9CQE3 | 28S ribosom    | 0.75818694 | 1.21853017 | 0.78944203 | 0.8972185  | 1.50532992 |
| A2ASZ8 | Calcium-bind   | 0.28787952 | 0.24057763 | 0.23820027 | 0.26541755 | 0.221507   |
| Q9CQ40 | 39S ribosom    | 0.87323359 | 1.1220181  | 1.16814015 | 1.01963742 | 2.36567275 |
| Q9ERD7 | Tubulin beta   | 0.42855283 | 0.33460349 | 0.34413472 | 0.56897239 | 0.27197264 |
| Q8VE33 | Ganglioside-i  | 0.14973934 | 0.40371827 | 0.3605119  | 0.26480053 | 0.19508697 |
| Q9CZN8 | Glutamyl-tRN   | 0.71841148 | 0.67542963 | 1.35872344 | 0.78405999 | 0.45708369 |
| Q9CQ92 | Mitochondri    | 1.92686331 | 1.77392902 | 1.80942421 | 1.99085503 | 1.00758982 |
| P52196 | Thiosulfate s  | 0.12256911 | 0.12573704 | 0.11546836 | 0.09866488 | 0.07268929 |
| Q9CPR5 | 39S ribosom    | 0.92308744 | 1.00017432 | 0.88420282 | 0.83937429 | 2.95118474 |
| Q9JKL4 | NADH dehyd     | 0.3747434  | 0.35401898 | 0.38087893 | 0.79303327 | 0.31570967 |
| Q9D0K2 | Succinyl-CoA   | 0.14479255 | 0.15060482 | 0.1478513  | 0.14233065 | 0.185775   |
| Q91VT4 | Carbonyl red   | 0.77107819 | 0.78643067 | 0.56570239 | 0.63188406 | 0.52708973 |
| Q8C163 | Nuclease EXC   | 0.2037001  | 0.2435415  | 0.21466213 | 0.19231937 | 0.17582475 |
| Q921H8 | 3-ketoacyl-Co  | 1.94748094 | 1.16268502 | 1.27681707 | 1.34211854 | 3.07782325 |
| Q8BWF0 | Succinate-sei  | 0.07135413 | 0.07377616 | 0.06699183 | 0.06824698 | 0.03460114 |
| Q3ULF4 | Paraplegin O   | 7.83368593 | 2.04292408 | 2.49242245 | 2.09265672 | 0.58524907 |
| Q99N89 | 39S ribosom    | 1.28500799 | 0.98175346 | 0.47839657 | 0.94796052 | 1.6071892  |
| P58059 | 28S ribosom    | 0.81647905 | 0.86002289 | 0.87444121 | 1.21753078 | 1.42371472 |
| Q80X85 | 28S ribosom    | 0.73284657 | 0.66241018 | 0.74394611 | 0.65851582 | 1.07366992 |
| Q8CAQ8 | MICOS comp     | 0.56374995 | 0.574972   | 0.56593768 | 0.53567477 | 0.42949622 |
| Q9CY27 | Very-long-ch   | 1.09150843 | 1.16912119 | 0.6511018  | 0.7162941  | 2.43092914 |
| Q9JI39 | ATP-binding    | 3.05353158 | 2.26270039 | 4.31203232 | 2.8372235  | 0.79484844 |
| Q8K4F5 | Protein ABHI   | 0.57204734 | 3.10345249 | 1.94011137 | 0.83380189 | 0.77870346 |
| Q99NB1 | Acetyl-coenz   | 0.00262265 | 0.00210867 | 0.0087308  | 0.08247916 | 0.00393631 |
| Q9DB15 | 39S ribosom    | 0.90628513 | 0.92397193 | 0.92182036 | 0.85785263 | 1.52719805 |
| Q5ND52 | rRNA methyl    | 1.1087275  | 0.67298577 | 0.69764645 | 0.81484008 | 1.67837516 |
| Q9QXX4 | Calcium-bind   | 0.96442593 | 0.7841307  | 1.13449929 | 0.75088652 | 0.40243163 |
| P03930 | ATP synthase   | 0.40202351 | 0.57457216 | 0.57302859 | 0.89003241 | 0.37733007 |
| P62075 | Mitochondri    | 1.17681563 | 0.99509728 | 1.13565546 | 0.70354151 | 0.65601219 |
| Q921G7 | Electron tran  | 0.64720185 | 0.57681482 | 0.65753259 | 0.6217188  | 0.47297692 |

|        |               |            |            |            |            |            |
|--------|---------------|------------|------------|------------|------------|------------|
| P51175 | Protoporphy   | 0.62223422 | 1.2744625  | 1.43203129 | 1.20446055 | 0.94293294 |
| Q9EQI8 | 39S ribosom   | 0.871287   | 1.32949863 | 1.11902928 | 1.04162972 | 1.7168371  |
| Q9CQN7 | 39S ribosom   | 0.73773013 | 0.79148649 | 0.70146378 | 0.8027295  | 1.16457693 |
| Q9JIK9 | 28S ribosom   | 0.62592535 | 1.6892479  | 0.78973862 | 0.75061889 | 1.83626519 |
| Q9QZD8 | Mitochondri   | 1.43988124 | 1.59962839 | 3.55497931 | 2.42761654 | 0.89955059 |
| P61922 | 4-aminobuty   | 0.03194536 | 0.03913076 | 0.03760278 | 0.03460703 | 0.01183982 |
| P53026 | 60S ribosom   | 2.9034289  | 1.53842034 | 3.73150913 | 1.36387175 | 12.2647131 |
| Q8BGT5 | Alanine amin  | 0.65982979 | 0.72306758 | 0.87864739 | 0.82158148 | 1.77989292 |
| Q9D6U8 | Protein FAM   | 1.66645317 | 1.43275053 | 2.02869721 | 1.26558282 | 0.75547701 |
| P41216 | Long-chain-f  | 2.3761949  | 1.38716202 | 1.01062558 | 1.17774085 | 0.88725919 |
| Q9DC71 | 28S ribosom   | 1.16085202 | 0.9913679  | 0.8780807  | 0.82264902 | 1.43560989 |
| Q8BGX2 | Mitochondri   | 0.40902958 | 0.4913935  | 0.55680343 | 0.72263895 | 0.41263165 |
| Q791T5 | Mitochondri   | 0.29501062 | 0.38232266 | 0.406552   | 0.4609729  | 0.36541402 |
| Q8BJ03 | Cytochrome    | 0.71268978 | 1.21610643 | 0.87447694 | 0.75652622 | 1.77786672 |
| Q8BFR5 | Elongation fa | 0.42249281 | 0.42631967 | 0.44176037 | 0.40606822 | 0.32667025 |
| Q9CRB9 | MICOS comp    | 0.67714158 | 0.58838137 | 0.54754867 | 0.49049822 | 0.44481355 |
| Q8C5H8 | NAD kinase 2  | 0.42396224 | 0.38856832 | 0.34709411 | 0.49896683 | 0.36747049 |
| Q60931 | Voltage-depe  | 0.66126339 | 0.71893038 | 0.7685608  | 0.79041644 | 0.53385103 |
| Q8QZT1 | Acetyl-CoA a  | 0.15128677 | 0.16221844 | 0.15597998 | 0.15007604 | 0.19054887 |
| Q6ZWN5 | 40S ribosom   | 5.6113782  | 1.6780116  | 2.31763088 | 2.74655331 | 26.6921888 |
| Q6P3A8 | 2-oxoisovale  | 0.26796478 | 0.36397971 | 0.34189554 | 0.22816453 | 0.28756753 |
| Q8K2B3 | Succinate de  | 0.42281753 | 0.47655834 | 0.46842274 | 0.45405079 | 0.3695021  |
| P47791 | Glutathione i | 0.91284015 | 0.69708717 | 1.05287178 | 0.99206847 | 0.50869026 |
| Q99J39 | Malonyl-CoA   | 0.55742297 | 0.34294532 | 0.33173344 | 0.28135336 | 0.29652769 |
| Q99PU8 | Putative ATP  | 1.13557437 | 2.53677903 | 1.82184333 | 1.77920146 | 1.05521565 |
| Q9CQF4 | Uncharacteri  | 3.52179264 | 1.40112864 | 2.04789035 | 1.25017651 | 0.98170712 |
| P51660 | Peroxisomal   | 1.3355773  | 1.26860107 | 1.46016453 | 1.33443512 | 2.16473795 |
| Q9WV84 | Nucleoside d  | 2.67401766 | 1.92325055 | 2.25018927 | 1.79300305 | 4.49001809 |
| P07901 | Heat shock p  | 2.34945208 | 2.04560091 | 1.91531869 | 1.18654559 | 0.96329432 |
| Q8BWT1 | 3-ketoacyl-C  | 0.30606772 | 0.32473851 | 0.31986112 | 0.32451968 | 0.36800015 |
| Q80U63 | Mitofusin-2 ( | 0.28658686 | 0.29330065 | 0.28586868 | 0.34819715 | 0.22313429 |
| Q9CY73 | 39S ribosom   | 1.275538   | 1.91936894 | 0.96873769 | 1.08902781 | 2.85309566 |
| Q99JY4 | TraB domain   | 2.30191767 | 1.42682002 | 2.29133929 | 1.01185747 | 2.32127467 |
| Q8VE22 | 28S ribosom   | 0.90602551 | 0.86757918 | 1.08899645 | 0.8389039  | 1.36886374 |
| Q91VC9 | Growth horn   | 1.48622035 | 1.61452157 | 1.19649559 | 2.11030235 | 0.87090478 |
| Q9D1B9 | 39S ribosom   | 0.8012601  | 0.60811475 | 0.68627541 | 0.86381146 | 0.65169594 |
| Q8BWM0 | Prostaglandii | 0.37471035 | 0.38303289 | 0.31348788 | 0.3337927  | 0.42532698 |
| Q9D880 | Mitochondri   | 0.77955097 | 0.83085753 | 0.7772787  | 0.83956545 | 1.09546691 |
| Q61425 | Hydroxyacyl-  | 0.699052   | 0.82437455 | 0.75272842 | 0.7225966  | 0.57420065 |
| Q91VA6 | Polymerase (  | 0.47148524 | 0.42552156 | 0.61199193 | 0.69663833 | 0.66122949 |
| Q9D023 | Mitochondri   | 0.18096844 | 0.29558953 | 0.26781993 | 0.28523609 | 0.20049967 |
| Q99N94 | 39S ribosom   | 0.79405378 | 0.47928127 | 0.57943868 | 0.68185936 | 1.36992226 |

|        |                |            |            |            |            |            |
|--------|----------------|------------|------------|------------|------------|------------|
| Q9CY16 | 28S ribosoma   | 1.04657766 | 0.9543087  | 0.83362673 | 0.84910053 | 1.19757057 |
| Q61733 | 28S ribosoma   | 0.86363729 | 0.91303788 | 0.87372544 | 0.88411871 | 1.33913501 |
| Q7TSQ8 | Pyruvate dehyd | 0.27915016 | 0.24320421 | 0.26536612 | 0.26217944 | 0.19706445 |
| Q3TUH1 | Phosphatidate  | 0.69953853 | 0.66784981 | 0.62445764 | 0.93005665 | 1.60030106 |
| Q922Q1 | Mitochondri    | 0.48363059 | 0.50991923 | 0.46739369 | 0.56647124 | 0.41014287 |
| P61027 | Ras-related p  | 1.59738108 | 1.88139042 | 1.62708541 | 1.5583648  | 0.93700337 |
| Q99LB2 | Dehydrogen     | 0.66653432 | 0.71689676 | 1.52030077 | 0.5458689  | 0.48007219 |
| P36536 | GTP-binding    | 2.37043275 | 5.04787211 | 20.4199188 | 23.8422609 | 0.58894958 |
| Q9CZW4 | Long-chain-f   | 4.28040978 | 1.85529362 | 7.03589295 | 5.2939953  | 0.78574241 |
| Q9D7N3 | 28S ribosoma   | 0.55109049 | 0.85298644 | 0.64827964 | 0.75642651 | 0.8991018  |
| P52503 | NADH dehyd     | 0.15661698 | 0.14805575 | 0.16032503 | 0.23034406 | 0.07990528 |
| P24369 | Peptidyl-prol  | 0.8063844  | 0.67970293 | 0.55295406 | 0.64232972 | 0.9202365  |
| P46638 | Ras-related p  | 0.73083983 | 0.65780588 | 0.5556106  | 0.52894844 | 1.11772658 |
| Q9CTY5 | Calcium upta   | 0.09564442 | 0.14242776 | 0.11451299 | 0.13227508 | 0.11919076 |
| Q9CXR1 | Dehydrogen     | 4.41287733 | 4.84186282 | 1.26389922 | 1.49501799 | 0.92332573 |
| Q9CQF0 | 39S ribosoma   | 1.03294644 | 1.27079044 | 1.1883544  | 1.07685186 | 1.43524969 |
| Q9D1P0 | 39S ribosoma   | 0.50820107 | 0.99160781 | 0.81720649 | 0.86215399 | 39.3631171 |
| P62242 | 40S ribosoma   | 1.82996278 | 1.70108619 | 1.3268032  | 1.32582092 | 14.371553  |
| Q8CD10 | Calcium upta   | 0.74850923 | 0.98787763 | 0.76057949 | 0.77870775 | 17.0853173 |
| P47802 | Metaxin-1 O'   | 0.86423019 | 0.82066528 | 0.95484964 | 0.95331657 | 0.66084443 |
| P11103 | Poly [ADP-rik  | 4.73395531 | 21.0867436 | 2.92505928 | 23.8422609 | 1.6527724  |
| Q9CQW2 | ADP-ribosyla   | 1.78469867 | 10.6017878 | 1.96982648 | 3.21635096 | 0.89765184 |
| Q9D0I9 | Arginine--tRN  | 0.65880363 | 0.74743815 | 0.32020774 | 3.13812036 | 0.54984759 |
| Q6PE15 | Mycophenoli    | 0.62284112 | 0.68258689 | 0.00255589 | 0.61411882 | 0.44614817 |
| Q3TBW2 | 39S ribosoma   | 0.55749719 | 0.85944403 | 2.0348021  | 0.95631744 | 1.96372581 |
| Q9DB73 | NADH-cytochl   | 2.23977803 | 4.06626676 | 1.85121005 | 3.62980264 | 1.37419896 |
| P62830 | 60S ribosoma   | 1.69132788 | 1.35651968 | 1.53043161 | 1.53632293 | 1.0894832  |
| Q8BMS1 | Trifunctional  | 0.67002668 | 0.7291003  | 0.70906398 | 0.67301739 | 0.54105479 |
| P62874 | Guanine nucl   | 0.68082972 | 0.81559729 | 0.47852169 | 0.00238423 | 0.8617699  |
| Q9CPX7 | 28S ribosoma   | 0.95742301 | 0.8136325  | 0.82851803 | 0.78390759 | 1.22873454 |
| Q8R035 | Peptidyl-tRN   | 1.10695856 | 1.37160813 | 1.10259677 | 1.27669907 | 1.93796708 |
| Q8BHE8 | m-AAA prote    | 0.90004025 | 1.03205442 | 0.81641083 | 0.83761905 | 0.70357275 |
| Q91V92 | ATP-citrate s  | 1.82529988 | 1.57899434 | 0.55996658 | 3.63380176 | 39.3631171 |
| Q80XN0 | D-beta-hydr    | 0.05881216 | 0.0612018  | 0.06478033 | 0.06061978 | 0.07604953 |
| P35980 | 60S ribosoma   | 2.48783436 | 2.71445329 | 1.53838185 | 2.21575845 | 10.7185586 |
| Q9D1D4 | Transmembr     | 1.68664247 | 1.1628834  | 0.68457431 | 1.12680818 | 1.6869004  |
| Q99N95 | 39S ribosoma   | 0.8938741  | 1.97597988 | 1.09506152 | 0.8321476  | 1.36990002 |
| Q8BUY5 | Complex I as   | 0.79888945 | 1.07931195 | 0.80690136 | 1.03179405 | 2.07282582 |
| P63321 | Ras-related p  | 1.25811047 | 21.0867436 | 1.64143411 | 23.8422609 | 0.63052839 |
| Q3TLP5 | Enoyl-CoA hy   | 1.10893547 | 21.0867436 | 20.4199188 | 23.8422609 | 39.3631171 |
| Q9CXJ1 | Probable glui  | 0.93976919 | 2.04346302 | 2.17049056 | 3.59043518 | 1.0087405  |
| Q8K248 | 4-hydroxyph    | 1.81244345 | 21.0867436 | 1.65079037 | 3.10720179 | 0.7880747  |



|        |               |            |            |            |            |            |
|--------|---------------|------------|------------|------------|------------|------------|
| Q9DCU6 | 39S ribosoma  | 1.09974235 | 0.95542469 | 0.62003837 | 0.71677693 | 1.19802696 |
| Q9Z2Y8 | Pyridoxal pho | 26.2264874 | 21.0867436 | 0.06333837 | 0.28775569 | 0.48787301 |
| A2AIL4 | NADH dehyd    | 4.62123636 | 21.0867436 | 0.73881633 | 2.00360704 | 0.90256962 |
| P47740 | Fatty aldehyc | 1.69398136 | 14.3267733 | 1.71612743 | 1.90291461 | 1.00207328 |
| P45878 | Peptidyl-prol | 1.97029558 | 2.5006478  | 2.54384108 | 3.66318416 | 1.9825506  |
| Q8JZR0 | Long-chain-fa | 4.2327373  | 0.70494732 | 7.5131333  | 0.93699877 | 39.3631171 |
| P62908 | 40S ribosoma  | 5.60278924 | 6.06743206 | 3.13536043 | 4.8234498  | 39.3631171 |
| Q9D7B6 | Isobutyryl-Cc | 0.27377684 | 0.40172192 | 0.298113   | 0.38387436 | 0.37318819 |
| Q9WVA2 | Mitochondri   | 0.69220009 | 0.78618739 | 0.68334604 | 0.64794879 | 0.54740283 |
| O54734 | Dolichyl-diph | 6.35576127 | 5.69730237 | 7.34142056 | 5.26361084 | 20.0989673 |
| Q9WV54 | Acid ceramid  | 26.2264874 | 5.23175449 | 13.9195245 | 3.1161857  | 1.28382145 |
| Q9D1E8 | 1-acyl-sn-gly | 0.44589754 | 2.13275755 | 0.82020625 | 1.00038741 | 0.57865285 |
| Q9CZ42 | ATP-depende   | 0.39034112 | 0.40374947 | 0.37928869 | 0.37199934 | 0.34753642 |
| Q99JY0 | Trifunctional | 0.64149647 | 0.6266166  | 0.60255499 | 0.62500231 | 0.45525485 |
| Q61941 | NAD(P) trans  | 1.22997663 | 1.2500678  | 1.10714588 | 1.22089131 | 0.87388693 |
| Q91W43 | Glycine dehy  | 0.48837183 | 0.30961399 | 0.32329453 | 0.45307389 | 0.60655565 |
| O35465 | Peptidyl-prol | 0.6913375  | 0.81869864 | 0.81212943 | 0.60619642 | 0.84147975 |
| Q8BTV1 | Tumor suppr   | 26.2264874 | 21.0867436 | 5.00976299 | 1.24546297 | 39.3631171 |
| P63017 | Heat shock c  | 3.05471987 | 2.90336274 | 2.93274642 | 2.64371455 | 1.75398421 |
| Q8CC88 | von Willebra  | 0.50267805 | 0.48093662 | 0.46341468 | 0.55015321 | 0.43826026 |
| Q99J25 | rRNA methyl   | 26.2264874 | 21.0867436 | 0.59993619 | 23.8422609 | 39.3631171 |
| Q9CQX2 | Cytochrome    | 1.42889293 | 1.42441729 | 1.42578395 | 1.36563438 | 0.9657419  |
| P47738 | Aldehyde del  | 0.43850079 | 0.46078701 | 0.45376134 | 0.43155813 | 0.52909087 |
| Q9WV98 | Mitochondri   | 0.41155146 | 0.45322343 | 0.41300397 | 0.39205611 | 0.38139484 |
| Q9Z0X1 | Apoptosis-in  | 0.60287254 | 0.82725177 | 0.68585682 | 0.66735302 | 0.53318743 |
| Q8BP40 | Lysophospha   | 0.75223938 | 2.02637847 | 1.64420584 | 1.96777848 | 1.41734087 |
| O08756 | 3-hydroxyacy  | 0.39807231 | 0.42118745 | 0.41979672 | 0.39526003 | 0.45420088 |
| Q8BH04 | Phosphoenol   | 2.75346128 | 2.60152945 | 2.54230498 | 2.50227004 | 1.77992013 |
| Q9CR59 | Growth arres  | 1.13311586 | 0.87502849 | 0.65054714 | 0.95107145 | 2.10290686 |
| Q99LB7 | Sarcosine del | 1.33996307 | 0.74614021 | 0.78732731 | 1.02325079 | 0.83509604 |
| Q62351 | Transferrin r | 1.95061013 | 4.25255509 | 2.5404456  | 1.75156827 | 3.8461585  |
| Q9CQL5 | 39S ribosoma  | 0.58917454 | 0.87312197 | 0.66648812 | 0.98995056 | 1.06537714 |
| Q9CXW2 | 28S ribosoma  | 0.99443157 | 0.70306222 | 0.67374232 | 0.77714987 | 1.09590425 |
| Q9D0Q7 | 39S ribosoma  | 1.44367462 | 1.14130902 | 1.08338143 | 0.93031176 | 1.1896958  |
| Q9DCN2 | NADH-cytoch   | 2.29121674 | 2.00921408 | 1.7545916  | 1.87962922 | 3.21444559 |
| P53986 | Monocarbox    | 1.67185753 | 1.51335829 | 1.257677   | 1.39974851 | 2.40383588 |
| Q99L04 | Dehydrogena   | 0.57652284 | 0.70989149 | 0.57656131 | 0.63385974 | 0.44664144 |
| P54116 | Erythrocyte k | 6.77235878 | 5.2456452  | 3.01018751 | 1.9073952  | 2.59996524 |
| Q9CRY7 | Glycerophos   | 1.8931499  | 1.78668914 | 1.9443378  | 2.13105077 | 2.13965455 |
| P14131 | 40S ribosoma  | 2.58304824 | 4.89726757 | 1.88719383 | 1.71328119 | 2.57933836 |
| Q8R3F5 | Malonyl-CoA   | 0.60687289 | 0.70536012 | 0.68056536 | 1.35817094 | 1.11865784 |
| Q9QZ23 | NFU1 iron-su  | 0.67262044 | 0.73439221 | 0.64866678 | 0.66218308 | 0.78313228 |

|        |                |            |            |            |            |            |
|--------|----------------|------------|------------|------------|------------|------------|
| P07356 | Annexin A2 C   | 1.74197748 | 2.37762417 | 1.02146711 | 2.61066545 | 21.0573561 |
| Q8R2Y8 | Peptidyl-tRN   | 1.60843918 | 1.68691344 | 1.41051763 | 1.44166419 | 2.3537209  |
| Q9Z110 | Delta-1-pyrro  | 1.7557557  | 1.32650266 | 1.63588851 | 1.62952771 | 2.66275396 |
| Q8K2Y7 | 39S ribosoma   | 0.6198992  | 0.65325249 | 0.63420357 | 0.64047057 | 0.79589598 |
| P35282 | Ras-related p  | 1.52329769 | 1.92030063 | 1.16053411 | 1.55405656 | 1.1841679  |
| Q9D8N0 | Elongation fa  | 3.05819873 | 3.10739865 | 3.51749974 | 1.76522161 | 6.7326338  |
| Q9DC29 | ATP-binding p  | 7.47442385 | 8.88031077 | 12.3010327 | 23.8422609 | 39.3631171 |
| Q9WTP7 | GTP:AMP pho    | 0.27701226 | 0.23828189 | 0.23765369 | 0.24615094 | 0.22002249 |
| Q99JT1 | Glutamyl-tRN   | 0.55009372 | 21.0867436 | 0.70696293 | 0.65579815 | 0.81514253 |
| Q9CQN1 | Heat shock p   | 0.8739491  | 0.99982571 | 0.94732462 | 0.92636682 | 1.21712589 |
| Q99JI6 | Ras-related p  | 10.0512305 | 21.0867436 | 10.6480532 | 4.39161078 | 3.84379576 |
| P47934 | Carnitine O-a  | 0.35146927 | 0.34171286 | 0.35610872 | 0.36354283 | 0.29860464 |
| Q9QXT0 | Protein cano   | 11.3811894 | 2.549912   | 3.95997208 | 8.17545601 | 39.3631171 |
| P50431 | Serine hydro   | 3.56856145 | 3.45041036 | 3.22347325 | 3.50591668 | 7.61426618 |
| Q3URE1 | Acyl-CoA syn   | 0.48583529 | 0.50101875 | 0.43543596 | 0.38069653 | 0.40469892 |
| Q9DCW4 | Electron tran  | 1.1756292  | 1.19325345 | 1.11993316 | 1.07610902 | 0.83724612 |
| Q9CZX8 | 40S ribosoma   | 1.18878227 | 8.86601264 | 1.07363491 | 0.78207083 | 0.40141824 |
| P14869 | 60S acidic rib | 3.56268749 | 2.56269344 | 2.26729013 | 2.2404255  | 9.15812102 |
| P14148 | 60S ribosoma   | 3.42915895 | 3.45287422 | 2.75729721 | 3.05106933 | 3.89376734 |
| Q9QYF1 | Retinol dehy   | 6.42753986 | 3.79595772 | 1.17227311 | 2.19594636 | 8.01864043 |
| Q9JKF7 | 39S ribosoma   | 0.71244886 | 0.52448166 | 1.44008503 | 0.81029401 | 1.54366489 |
| Q9QYA2 | Mitochondri    | 0.70219294 | 0.60620899 | 0.59682376 | 0.57661768 | 0.71424422 |
| Q6ZQI3 | Malectin OS-   | 26.2264874 | 12.0947763 | 20.4199188 | 23.8422609 | 39.3631171 |
| Q9CQ06 | 39S ribosoma   | 1.11713287 | 0.96792872 | 0.64866951 | 0.71304595 | 1.03219505 |
| Q3ULD5 | Methylcrotoi   | 0.31123504 | 0.39402569 | 0.36482748 | 0.36764643 | 0.39072809 |
| Q9CXT8 | Mitochondri    | 0.58623963 | 0.42896035 | 0.86624277 | 0.86096691 | 0.58542912 |
| P97493 | Thioredoxin,   | 0.60361526 | 0.31989683 | 0.00204199 | 0.40489319 | 0.65028506 |
| Q8K2C9 | Very-long-ch   | 1.98627244 | 1.35154239 | 1.0739871  | 1.00142914 | 1.85801788 |
| O88741 | Ganglioside-i  | 0.07463436 | 0.05716079 | 0.05668725 | 0.06146642 | 0.0523233  |
| Q921S7 | 39S ribosoma   | 0.4052433  | 0.42045427 | 0.2231655  | 0.3412641  | 0.48038559 |
| Q5U458 | DnaJ homolo    | 0.83257084 | 1.13838916 | 0.80539105 | 0.79045794 | 0.68953824 |
| Q61207 | Prosaposin C   | 3.92829424 | 2.15740805 | 2.18018061 | 3.43862658 | 9.96753097 |
| Q9CZB0 | Succinate de   | 0.46390846 | 0.48373536 | 0.48482848 | 0.61175398 | 0.40369357 |
| Q9DBL1 | Short/branch   | 0.27209637 | 0.29513213 | 0.2835536  | 0.32527355 | 0.37558938 |
| O88986 | 2-amino-3-ke   | 0.68832124 | 0.88879622 | 0.89024831 | 0.90157363 | 1.03461683 |
| Q9DBL7 | Bifunctional   | 0.64265013 | 11.9508603 | 20.4199188 | 0.74034717 | 0.41947413 |
| Q922Q4 | Pyrroline-5-c  | 1.28841781 | 1.44839914 | 1.40615547 | 1.37139749 | 1.90863871 |
| Q9CR88 | 28S ribosoma   | 0.72720284 | 1.03473477 | 1.52068791 | 0.66696471 | 3.13949705 |
| P62900 | 60S ribosoma   | 26.2264874 | 9.49539013 | 0.96118657 | 3.31653167 | 1.65779445 |
| Q02053 | Ubiquitin-like | 0.86499816 | 21.0867436 | 1.6964305  | 1.6845085  | 0.55304934 |
| Q9CQS4 | Solute carrier | 0.21537556 | 0.25490298 | 0.16017414 | 0.27634165 | 0.23275914 |
| Q99LC5 | Electron tran  | 1.10888332 | 1.15508921 | 1.09693004 | 1.06359291 | 0.87111153 |

|        |                |            |            |            |            |            |
|--------|----------------|------------|------------|------------|------------|------------|
| Q8C3X4 | Translation f  | 0.82979444 | 0.42120191 | 0.90251009 | 1.80548823 | 0.55812822 |
| Q9CQL4 | 39S ribosoma   | 0.98540797 | 0.89917191 | 0.87376858 | 0.8732852  | 3.42266571 |
| Q8CGC7 | Bifunctional   | 3.56646748 | 3.02066733 | 2.17064149 | 2.60724092 | 5.52182424 |
| Q6ZWV3 | 60S ribosoma   | 1.08453122 | 0.63110497 | 1.68080246 | 1.47770728 | 0.71165859 |
| Q9D2R6 | Cytochrome     | 0.57360987 | 0.50553277 | 0.4847     | 0.87372938 | 0.57302172 |
| Q91WK5 | Glycine cleav  | 26.2264874 | 0.20940728 | 0.26263692 | 0.30999281 | 0.00393631 |
| Q60649 | Caseinolytic   | 0.44725348 | 0.41113038 | 0.34182438 | 0.63772266 | 0.54110889 |
| Q9CPU4 | Microsomal     | 0.00262265 | 0.02594873 | 0.00204199 | 0.01742365 | 0.03102037 |
| Q9CZL5 | Pterin-4-alph  | 26.2264874 | 0.08418847 | 0.12108289 | 0.12746343 | 0.3406167  |
| Q78IK4 | MICOS comp     | 0.83070961 | 0.86304591 | 0.80833751 | 0.67924168 | 0.92553155 |
| Q91YJ5 | Translation ir | 0.73605217 | 0.9825112  | 1.03044811 | 0.6252896  | 1.00898357 |
| Q9D8E6 | 60S ribosoma   | 2.74587878 | 3.77516812 | 2.5972593  | 3.97196238 | 6.76376689 |
| Q9JLJ2 | 4-trimethyla   | 1.03656324 | 0.9356618  | 1.04046503 | 1.06988751 | 0.86024025 |
| Q3UHB1 | 5'-nucleotida  | 0.15987981 | 0.20139922 | 0.18645102 | 0.18178726 | 0.1829685  |
| Q9EPE9 | Manganese-t    | 1.45536526 | 1.67569916 | 1.00171235 | 1.38529628 | 1.30078371 |
| Q9CQ62 | 2,4-dienoyl-C  | 0.49564647 | 0.4489528  | 0.51607716 | 0.46484085 | 0.53973522 |
| Q9CWV0 | Mitochondria   | 0.77613533 | 1.66503479 | 20.4199188 | 23.8422591 | 1.98203969 |
| Q8BGY7 | Protein FAM    | 0.87752913 | 0.47523672 | 0.92268491 | 1.31047885 | 1.72792423 |
| Q9D773 | 39S ribosoma   | 1.2031714  | 1.10971528 | 1.2839831  | 0.75511744 | 2.71668935 |
| Q8BSF4 | Phosphatidyl   | 1.4651215  | 4.35230937 | 2.33410448 | 1.34070096 | 1.1119269  |
| Q9Z2Z6 | Mitochondria   | 0.4746905  | 0.56022773 | 0.48551922 | 0.57927885 | 0.61605345 |
| Q9WTM5 | RuvB-like 2 C  | 1.15779248 | 4.55711247 | 0.35675611 | 1.6955869  | 0.41126127 |
| Q9CQB5 | CDGSH iron-s   | 1.24313794 | 1.17210922 | 1.19725468 | 0.93690549 | 1.72094881 |
| P52825 | Carnitine O-p  | 0.93086709 | 0.92214856 | 1.07014294 | 0.93890101 | 0.75772689 |
| Q9ESW4 | Acylglycerol   | 0.43114052 | 0.36805435 | 0.34822822 | 0.41040485 | 0.45825722 |
| Q8C5Q4 | G-rich seque   | 0.81029839 | 8.21208099 | 0.88149701 | 0.99473663 | 1.52731977 |
| Q8BYM8 | Probable cys   | 0.99985907 | 0.9938579  | 1.86458963 | 1.34856958 | 0.56871907 |
| Q91YQ5 | Dolichyl-diph  | 4.02024037 | 2.86018682 | 2.81505072 | 2.76170711 | 4.74455456 |
| Q8K4Z3 | NAD(P)H-hyc    | 0.45856944 | 0.47372928 | 0.36432235 | 0.37933426 | 0.41978637 |
| O08734 | Bcl-2 homolc   | 4.4295135  | 4.40804513 | 3.09672119 | 3.60236136 | 16.6226252 |
| Q80UM7 | Mannosyl-oli   | 6.38739385 | 3.70630101 | 1.48295382 | 3.57401807 | 2.46384104 |
| P58064 | 28S ribosoma   | 0.64177447 | 1.07647414 | 1.96383785 | 1.36716907 | 39.3631171 |
| P97478 | 5-demethoxy    | 26.2264874 | 2.02400872 | 1.29767806 | 3.15018364 | 0.51356074 |
| Q07813 | Apoptosis re   | 5.96797505 | 4.23673424 | 6.09980149 | 3.54806679 | 11.8428116 |
| Q8VDP6 | CDP-diacylgl   | 1.3024858  | 1.94722294 | 2.41704131 | 2.6121625  | 3.10925552 |
| Q9QZH6 | Evolutionaril  | 0.56500215 | 0.73004013 | 0.58420727 | 0.60305975 | 0.66026496 |
| Q3UQ84 | Threonine--t   | 1.47355301 | 1.16052492 | 0.98736706 | 1.12102051 | 1.09117417 |
| Q8VCX5 | Calcium upta   | 0.31832956 | 0.2552959  | 0.33025016 | 0.27393247 | 0.43058257 |
| Q99N91 | 39S ribosoma   | 5.25721447 | 1.07405733 | 2.46587069 | 23.8422609 | 39.3631171 |
| Q8R3Q6 | Coiled-coil d  | 1.11059148 | 21.0867436 | 2.81081339 | 0.97101046 | 1.26890434 |
| Q8CHT0 | Delta-1-pyrr   | 0.12461508 | 0.14358592 | 0.15199275 | 0.1798456  | 0.17065036 |
| Q99J47 | Dehydrogen     | 2.11040991 | 1.08022805 | 1.02609296 | 0.72703933 | 0.87638031 |

|        |                |            |            |            |            |            |
|--------|----------------|------------|------------|------------|------------|------------|
| Q5XJY4 | Presenilins-a  | 2.70434314 | 3.83639267 | 2.18901613 | 0.99333303 | 2.60477782 |
| Q924D0 | Reticulon-4-i  | 0.59614157 | 0.43845539 | 0.50316145 | 0.42009821 | 0.46553564 |
| Q9CWU6 | Ubiquinol-cy   | 1.63242136 | 1.20336108 | 1.56041497 | 1.37757795 | 1.04939128 |
| Q8K1R3 | Polyribonucl   | 1.21648403 | 1.0874837  | 1.2382085  | 1.3889391  | 1.07357626 |
| P80317 | T-complex pr   | 0.50329252 | 3.20794727 | 2.85508683 | 1.86583116 | 39.3631171 |
| B7ZMP1 | Probable Xaa   | 0.37673238 | 0.42139155 | 0.41520185 | 0.42148772 | 0.48382741 |
| Q3V3R1 | Monofunctio    | 2.35528777 | 2.46751154 | 2.31198012 | 2.35856995 | 1.65935459 |
| Q80Y14 | Glutaredoxin   | 0.5323808  | 0.55679276 | 0.53290197 | 0.52133237 | 0.57949829 |
| P51174 | Long-chain sj  | 0.41794631 | 0.50496707 | 0.43410633 | 0.42489338 | 0.4566838  |
| Q99LP6 | GrpE protein   | 1.18128731 | 1.14844551 | 1.15770903 | 1.15382267 | 1.30768115 |
| O35143 | ATPase inhib   | 0.24810993 | 0.27065961 | 0.24242962 | 0.28754954 | 0.25677748 |
| Q07417 | Short-chain s  | 0.7598065  | 0.63352726 | 0.74054119 | 0.90127213 | 0.93749523 |
| Q91WM2 | Haloacid deh   | 0.62515394 | 0.95786523 | 0.58914903 | 0.74716167 | 0.884      |
| Q60715 | Prolyl 4-hydr  | 1.45094609 | 0.93683652 | 0.68848984 | 1.09975605 | 1.52086916 |
| Q01768 | Nucleoside d   | 26.2264854 | 1.04270089 | 0.59756664 | 1.03375199 | 1.17243322 |
| Q9CYR0 | Single-strand  | 0.92527676 | 0.91154945 | 1.68231208 | 2.01817762 | 1.84557651 |
| Q80YD1 | ATP-depende    | 1.47571551 | 1.37114228 | 1.01693085 | 1.11169303 | 1.08885253 |
| Q78PY7 | Staphylococc   | 1.54104725 | 1.28113355 | 0.90205605 | 3.48856482 | 1.54713983 |
| Q9CQV5 | 28S ribosom    | 0.26945147 | 3.54432111 | 1.06993077 | 0.61713163 | 1.90324858 |
| Q8BG51 | Mitochondri    | 0.60274492 | 0.53062367 | 0.50661788 | 0.63726648 | 0.44941754 |
| Q8K4X7 | 1-acyl-sn-gly  | 0.52037299 | 21.0867436 | 20.4199173 | 23.8422609 | 39.3631171 |
| O70251 | Elongation fa  | 26.2264874 | 8.41813251 | 3.7422124  | 8.10867068 | 39.3631171 |
| P20152 | Vimentin OS    | 3.08221154 | 4.73370743 | 2.69608903 | 5.78612074 | 4.03480585 |
| Q9Z218 | Succinate--C   | 1.68474447 | 1.78012065 | 1.77209109 | 1.56831211 | 1.24843072 |
| Q9DCB8 | Iron-sulfur cl | 0.40461867 | 0.18989783 | 0.43643191 | 0.59374529 | 0.37579534 |
| P50171 | Estradiol 17-  | 0.34028837 | 0.35898846 | 0.39295821 | 0.3253074  | 0.32969904 |
| Q924T2 | 28S ribosom    | 0.85311925 | 2.70816755 | 1.23027871 | 1.00538869 | 1.34245876 |
| P35564 | Calnexin OS=   | 4.29194209 | 4.29283358 | 3.85416348 | 3.64270404 | 6.1256884  |
| P47911 | 60S ribosom    | 4.12277512 | 2.74757548 | 5.25914915 | 5.50172922 | 7.98391556 |
| Q91V12 | Cytosolic acy  | 4.06129179 | 0.45857704 | 20.4199188 | 4.58317816 | 2.66320237 |
| Q8BP92 | Reticulocalbi  | 3.90748665 | 6.79270836 | 1.63100815 | 2.42338391 | 4.10224873 |
| P47963 | 60S ribosom    | 2.88342943 | 2.12962544 | 2.17870331 | 5.67052429 | 5.45315569 |
| Q9CZD3 | Glycine--tRN   | 3.596347   | 1.08731447 | 1.36375629 | 1.2975654  | 1.29898923 |
| Q925I1 | ATPase famil   | 0.99522256 | 1.05645545 | 0.97230415 | 0.96017149 | 0.82448257 |
| P15532 | Nucleoside d   | 0.52676815 | 0.5028576  | 0.50062346 | 0.50509312 | 0.38607349 |
| P80313 | T-complex pr   | 1.02618852 | 9.95968637 | 1.95029703 | 2.55301024 | 2.23212865 |
| Q9WTP6 | Adenylate kii  | 2.16255019 | 1.93839792 | 2.02686277 | 2.04119391 | 2.73050786 |
| P27659 | 60S ribosom    | 12.0436417 | 2.56647249 | 7.32400384 | 2.66953417 | 3.44791822 |
| O88696 | ATP-depende    | 0.59151343 | 0.6030363  | 0.54312127 | 0.50723809 | 0.64618977 |
| Q8K411 | Presequence    | 0.98659821 | 1.15835707 | 1.12214199 | 1.16141049 | 1.13847997 |
| P38060 | Hydroxymetf    | 0.40198793 | 0.30401771 | 0.41869445 | 0.35739804 | 0.43555943 |
| Q9D1H8 | 39S ribosom    | 0.9110724  | 0.68454126 | 0.71196516 | 0.83226345 | 0.97526635 |

|        |                |            |            |            |            |            |
|--------|----------------|------------|------------|------------|------------|------------|
| Q5SUC9 | Protein SCO1   | 0.73166922 | 0.55470541 | 0.30156532 | 0.62897459 | 0.45591086 |
| Q9CZR8 | Elongation fa  | 0.88510606 | 1.07273018 | 1.10031325 | 0.89682997 | 0.81855694 |
| Q9CWG8 | Protein argin  | 0.46001317 | 0.33459901 | 0.2843687  | 0.29427574 | 0.31182963 |
| Q99M87 | DnaJ homolo    | 0.68655717 | 0.74980704 | 0.73148371 | 0.70991906 | 0.65120454 |
| P14211 | Calreticulin C | 4.67480455 | 4.07951033 | 3.48713323 | 4.56155228 | 5.68277712 |
| Q8K0D5 | Elongation fa  | 1.33835145 | 0.77669788 | 0.82582069 | 1.00390381 | 1.13336904 |
| Q9CRD2 | ER membran     | 3.37352756 | 4.33878105 | 3.18273686 | 1.66316366 | 3.32799311 |
| Q62186 | Translocon-a   | 5.12309266 | 1.80726538 | 3.2114438  | 4.68333296 | 4.67503724 |
| Q99N93 | 39S ribosom    | 0.80439642 | 2.96470956 | 0.78093075 | 0.85287289 | 1.46456924 |
| Q9JL8  | Serine--tRNA   | 0.65216864 | 0.43392232 | 0.7635944  | 0.53705007 | 0.55317435 |
| Q3U7R1 | Extended syr   | 11.0935869 | 4.53720167 | 3.57196254 | 5.48264543 | 5.37932807 |
| Q9QY76 | Vesicle-assoc  | 2.0483942  | 1.15637796 | 1.48349198 | 0.82495929 | 1.57217621 |
| Q3UMR5 | Calcium unip   | 0.34268384 | 0.38878445 | 0.35718088 | 0.35420358 | 0.35150285 |
| Q3URS9 | Coiled-coil d  | 1.13574157 | 0.94930123 | 0.99278023 | 0.89109352 | 0.93188156 |
| O35887 | Calumenin O    | 8.37715741 | 4.69871905 | 4.4320238  | 4.60646889 | 10.7288069 |
| Q9EP69 | Phosphatidyl   | 1.98627907 | 0.99423677 | 1.14561259 | 1.89726678 | 1.50428717 |
| P62270 | 40S ribosom    | 11.5964646 | 7.3051726  | 4.15258115 | 3.10932641 | 9.35642392 |
| Q8BH24 | Transmembr     | 1.60327718 | 0.92968615 | 1.88792507 | 1.26938298 | 1.71008053 |
| P99027 | 60S acidic rib | 6.24173622 | 4.38062128 | 3.33096499 | 3.40150606 | 5.26873004 |
| P62301 | 40S ribosom    | 2.69152874 | 3.14992322 | 4.02192885 | 1.82280394 | 3.73468468 |
| P99024 | Tubulin beta   | 1.19819298 | 1.13578131 | 1.21380608 | 1.11212527 | 1.26006461 |
| Q9D8Y1 | Transmembr     | 0.83807457 | 1.29126511 | 0.66052291 | 0.75672875 | 0.92318936 |
| P61979 | Heterogenec    | 23.7038808 | 21.0867436 | 3.66931556 | 4.06061323 | 14.8502504 |
| Q8K013 | GTP-binding    | 0.74702329 | 1.22628716 | 1.69301496 | 1.83779358 | 1.20193277 |
| Q62465 | Synaptic vesi  | 0.91350258 | 1.0902291  | 0.58282141 | 1.2004985  | 0.80783132 |
| P09103 | Protein disul  | 6.27659629 | 4.609695   | 5.07535515 | 5.12052126 | 8.52911885 |
| P35278 | Ras-related p  | 1.61833699 | 1.6835741  | 1.8030019  | 1.47900936 | 1.34001587 |
| Q9D1M7 | Peptidyl-prol  | 5.31037447 | 8.95520884 | 4.19967462 | 2.85244415 | 39.3631171 |
| Q8BMF3 | NADP-depen     | 0.00262265 | 0.02359645 | 0.01135019 | 0.00238423 | 0.01548614 |
| Q91YM4 | Protein TBRC   | 0.41382429 | 1.90681555 | 0.46085312 | 0.73567092 | 0.55479254 |
| P63038 | 60 kDa heat    | 1.01172685 | 1.03906714 | 1.0493063  | 0.98842645 | 0.89446144 |
| P11499 | Heat shock p   | 2.40817364 | 1.29175489 | 1.26504205 | 1.56285368 | 1.81057797 |
| P18155 | Bifunctional   | 7.31155729 | 5.00568036 | 3.8042124  | 4.98655497 | 6.94109417 |
| Q99MN1 | Lysine--tRNA   | 1.26490035 | 1.26523267 | 1.03612438 | 0.74971535 | 1.0814836  |
| Q9CPQ3 | Mitochondri    | 0.55612043 | 0.5887621  | 0.56954874 | 0.55918732 | 0.57488355 |
| O35658 | Complement     | 0.80477216 | 0.96055875 | 1.082964   | 0.96737004 | 0.79789881 |
| Q99PL5 | Ribosome-bi    | 1.86095619 | 2.02826558 | 1.56716124 | 1.98379882 | 2.24656506 |
| Q8BHN3 | Neutral alph   | 6.12201755 | 3.71417886 | 5.54554594 | 6.01014081 | 8.62509933 |
| Q80ZS3 | 28S ribosom    | 0.45158213 | 0.4455403  | 0.41329943 | 0.6662495  | 0.47392752 |
| Q8BFP9 | [Pyruvate de   | 0.10076923 | 0.14729371 | 0.20788125 | 0.16430442 | 0.16607078 |
| Q9JHI5 | Isovaleryl-Co  | 0.27943973 | 0.24067818 | 0.2595139  | 0.26114118 | 0.22878498 |
| P50136 | 2-oxoisovale   | 0.45786677 | 0.44422552 | 0.4809111  | 0.5041856  | 0.46840512 |

|        |                |            |            |            |            |            |
|--------|----------------|------------|------------|------------|------------|------------|
| O08807 | Peroxiredoxin  | 4.68976694 | 2.93567933 | 3.7580603  | 5.60704594 | 4.85066773 |
| Q9CQV1 | Mitochondrial  | 0.85743368 | 1.00561374 | 0.80071662 | 0.91589455 | 0.82399005 |
| Q60759 | Glutaryl-CoA   | 0.3989928  | 0.40904614 | 0.34406815 | 0.32171131 | 0.32235843 |
| Q9D5T0 | ATPase family  | 0.66149712 | 0.66630658 | 0.54475703 | 0.60496949 | 0.61354426 |
| Q925N0 | Sideroflexin-  | 0.01942422 | 0.02546969 | 0.04665156 | 0.04792218 | 0.01735074 |
| Q9DB41 | Mitochondrial  | 0.00965328 | 0.01855381 | 0.02107323 | 0.02584285 | 0.00626612 |
| Q61879 | Myosin-10 O    | 2.73146689 | 2.90197476 | 2.19222116 | 2.54348381 | 3.38134175 |
| Q3TZX3 | Solute carrier | 1.74268918 | 0.97910549 | 2.48888676 | 0.95964716 | 1.49992206 |
| Q9Z1Q9 | Valine--tRNA   | 21.8880699 | 3.35667898 | 1.06065873 | 1.95575931 | 2.7024626  |
| P26443 | Glutamate de   | 0.1024809  | 0.10983968 | 0.1002654  | 0.09625317 | 0.0937513  |
| P20029 | 78 kDa gluco   | 6.19512974 | 5.93015755 | 4.34056945 | 4.73335237 | 7.41591297 |
| Q9DCM0 | Persulfide di  | 0.44630807 | 0.47268442 | 0.44997994 | 0.3890223  | 0.43304291 |
| Q8VCW8 | Acyl-CoA syn   | 0.21904356 | 0.21621797 | 0.21857712 | 0.23649867 | 0.23214297 |
| Q9R0X4 | Acyl-coenzym   | 0.51062625 | 0.47032775 | 0.56839179 | 0.5523536  | 0.66059592 |
| Q61578 | NADPH:adre     | 0.81718863 | 0.76334266 | 0.96424145 | 0.96882105 | 0.98477138 |
| Q9D8S9 | BolA-like pro  | 0.78119567 | 1.69667166 | 2.03826457 | 1.1410444  | 1.39561154 |
| P40630 | Transcriptio   | 0.97233238 | 1.14064981 | 1.01675802 | 0.93526888 | 0.82448463 |
| Q3TQB2 | FAD-depende    | 0.52369433 | 0.33724344 | 0.33604953 | 0.94289495 | 0.40486916 |
| P63037 | DnaJ homolo    | 7.02101138 | 1.07186425 | 1.23665487 | 1.35248014 | 1.6003752  |
| Q91WK1 | SPRY domain    | 0.68118351 | 0.7303998  | 1.06267711 | 0.65846779 | 0.89430574 |
| Q8BMD8 | Calcium-bind   | 5.73819465 | 12.4466759 | 4.32283997 | 6.35290105 | 15.1116896 |
| Q64433 | 10 kDa heat    | 0.95695123 | 1.04738197 | 0.97395379 | 0.95572296 | 0.88322481 |
| Q60714 | Long-chain fa  | 0.59964556 | 1.32335788 | 0.87467246 | 0.61797623 | 0.33713014 |
| O35435 | Dihydroorota   | 1.14260011 | 1.04175191 | 1.18447159 | 0.83859239 | 1.12546067 |
| Q8K2M0 | 39S ribosom    | 1.39214449 | 0.93259836 | 1.27469909 | 1.02806983 | 1.36247328 |
| Q8C3X2 | Coiled-coil d  | 1.01120411 | 0.68217911 | 0.56143282 | 1.31662395 | 1.01451428 |
| Q9DCS3 | Enoyl-[acyl-c  | 0.59787411 | 0.49866594 | 0.50365964 | 0.54366738 | 0.47508669 |
| Q6PCP5 | Mitochondrial  | 0.2883327  | 0.32158113 | 0.32089076 | 0.34721846 | 0.30868214 |
| Q9QUJ7 | Long-chain-fa  | 4.10272663 | 3.57428484 | 3.07763847 | 3.99425083 | 4.23911509 |
| Q8BYL4 | Tyrosine--tR   | 0.48873225 | 0.40791262 | 0.64305843 | 0.7106407  | 0.39165021 |
| P53395 | Lipoamide ac   | 0.38482089 | 0.35789488 | 0.36065813 | 0.34142798 | 0.28840807 |
| Q59J78 | Mimitin, mit   | 0.65642347 | 0.70018821 | 0.78744727 | 0.94353939 | 0.72218971 |
| Q99KF1 | Transmembr     | 0.74171697 | 0.73293234 | 0.7945984  | 1.0937119  | 0.96009792 |
| Q9JLT4 | Thioredoxin    | 0.24258912 | 0.24110971 | 0.24551953 | 0.27936745 | 0.30200071 |
| Q6GQT9 | Nodal modul    | 4.77938225 | 5.11672072 | 3.26107395 | 5.69134979 | 9.23078941 |
| P08113 | Endoplasmic    | 6.52683062 | 4.6261843  | 6.31965852 | 7.16734276 | 7.7272506  |
| Q3U186 | Probable arg   | 0.83723212 | 1.41530359 | 1.39396711 | 0.79003501 | 0.99512658 |
| P54071 | Isocitrate de  | 0.8702926  | 0.884804   | 0.7605569  | 0.75259566 | 0.86069335 |
| P37040 | NADPH--cyto    | 7.30892007 | 6.20725891 | 2.45476742 | 6.83178175 | 3.29383208 |
| Q8R3K3 | Pentatricope   | 26.2264874 | 5.66420914 | 0.89858579 | 1.21920144 | 39.3631141 |
| P58252 | Elongation fa  | 1.20442085 | 2.26357578 | 1.31763857 | 0.96284773 | 0.93955175 |
| Q66GT5 | Phosphatidyl   | 26.2264874 | 2.96306859 | 20.4199188 | 0.42792526 | 0.64249029 |

|        |                |            |            |            |            |            |
|--------|----------------|------------|------------|------------|------------|------------|
| Q810S1 | Calcium unip   | 26.2264874 | 1.71533746 | 1.15206236 | 4.58469159 | 6.5796975  |
| Q8JZN5 | Acyl-CoA def   | 0.37070154 | 0.43463682 | 0.39633378 | 0.40003746 | 0.40204774 |
| O35855 | Branched-ch    | 0.72473421 | 0.58499753 | 0.66669728 | 0.74115379 | 0.59698512 |
| Q8R127 | Saccharopin    | 0.87018699 | 0.81592875 | 0.7837958  | 0.62964712 | 0.69679094 |
| P36552 | Oxygen-depe    | 0.74484823 | 1.34122813 | 0.48565943 | 0.96451963 | 1.29847475 |
| O70378 | ER membran     | 1.25321221 | 1.26236711 | 1.42671276 | 2.52094706 | 1.53041519 |
| Q9QYR9 | Acyl-coenzyn   | 2.75181552 | 1.46647621 | 1.67308863 | 1.63154955 | 1.77925512 |
| Q9CYN2 | Signal peptid  | 4.61190606 | 13.3943326 | 1.01500478 | 4.48657682 | 10.0865683 |
| Q9JKR6 | Hypoxia up-r   | 9.1272346  | 4.77385521 | 4.91982721 | 5.76718429 | 8.28873406 |
| Q9CPY7 | Cytosol amin   | 1.77902292 | 1.22517317 | 1.26800102 | 1.30781717 | 1.49842864 |
| Q9DB25 | Dolichyl-pho   | 3.68499486 | 1.61935901 | 1.7006544  | 23.8422609 | 5.37159341 |
| P18572 | Basigin OS=N   | 3.09314759 | 2.37940651 | 4.43285534 | 4.65464564 | 2.31339492 |
| Q8VCL2 | Protein SCO2   | 0.39982359 | 0.25910349 | 0.54940094 | 0.58911486 | 0.5323136  |
| P19258 | Protein Mpv:   | 0.80236686 | 0.6398672  | 0.60260689 | 0.62708383 | 0.64149563 |
| Q99KE1 | NAD-depend     | 0.85151651 | 0.91366672 | 0.98827795 | 0.82061496 | 0.88536175 |
| O35129 | Prohibitin-2 ( | 0.7973211  | 0.82305464 | 0.76763384 | 0.75302904 | 0.78440567 |
| Q61576 | Peptidyl-prol  | 26.2264874 | 0.40322231 | 0.56096389 | 0.42591632 | 39.3631171 |
| Q9D0L4 | Uncharacteri   | 0.35692062 | 0.30672734 | 0.27482306 | 0.34156222 | 0.32619626 |
| P63276 | 40S ribosom    | 4.43009176 | 21.0867436 | 20.4199188 | 23.8422609 | 6.40920317 |
| P10107 | Annexin A1 C   | 26.2264874 | 7.56643139 | 11.5442507 | 1.56519192 | 2.93297729 |
| Q8VDD5 | Myosin-9 OS    | 10.2530295 | 7.79551114 | 7.23417985 | 9.04216636 | 12.9674881 |
| Q9CRD0 | OClA domain    | 0.45167614 | 0.5574398  | 0.50302343 | 0.5116254  | 0.46905483 |
| Q3U2A8 | Valine--tRNA   | 0.92628579 | 21.0867436 | 0.87046862 | 0.14043341 | 0.61556853 |
| P09925 | Surfeit locus  | 0.98342306 | 0.93081261 | 1.60862381 | 1.50960767 | 1.30962729 |
| Q8R2Q4 | Ribosome-re    | 26.2264874 | 21.0867436 | 0.97323432 | 1.43154976 | 0.6379304  |
| Q920A7 | AFG3-like pro  | 2.27945407 | 1.24568847 | 2.00334622 | 3.02211121 | 2.55183366 |
| O35114 | Lysosome me    | 4.74502341 | 4.57193909 | 2.13368986 | 1.72054408 | 2.94802428 |
| Q9JIY5 | Serine prote   | 1.38102712 | 1.2884261  | 1.19632694 | 1.23396017 | 1.39880006 |
| Q9DBG6 | Dolichyl-diph  | 8.40415535 | 6.30975135 | 5.06417672 | 5.87495532 | 8.40417957 |
| Q8BK08 | Transmembr     | 1.48065466 | 0.94583178 | 0.84712831 | 0.80693911 | 1.94404586 |
| Q8BRH0 | Transmembr     | 26.2264874 | 21.0867436 | 2.42134778 | 9.24154188 | 2.76197674 |
| Q922Q8 | Leucine-rich   | 10.792275  | 6.31982037 | 4.75156136 | 6.10217913 | 10.8739042 |
| Q9D0F3 | Protein ERGl   | 26.2264874 | 4.04447448 | 3.80619758 | 7.93550906 | 39.3631171 |
| P38647 | Stress-70 pro  | 1.56496264 | 1.62739733 | 1.58550774 | 1.58838704 | 1.65470438 |
| Q9CXV1 | Succinate de   | 0.53729401 | 0.67951792 | 0.55400054 | 0.46819183 | 0.56826555 |
| Q5SSK3 | Transcriptior  | 26.2264874 | 5.34573009 | 1.76364036 | 1.90493156 | 3.12156532 |
| Q99MR8 | Methylcrotoi   | 0.36616742 | 0.25585038 | 0.32845685 | 0.38779912 | 0.35889137 |
| Q5IRJ6 | Zinc transpor  | 0.30285739 | 0.65736291 | 0.59160912 | 0.58640736 | 0.35600779 |
| Q9CZU4 | GTPase Era, r  | 0.92193885 | 1.43386281 | 2.8664604  | 2.67327863 | 1.94400213 |
| Q9D710 | Thioredoxin-   | 4.60463221 | 4.01170019 | 5.08363587 | 2.15880834 | 4.31228914 |
| Q99KK9 | Probable hist  | 0.49801969 | 0.43514902 | 0.51636406 | 0.4934332  | 0.4363127  |
| P50544 | Very long-ch   | 0.84531384 | 0.73904097 | 0.79177229 | 0.72314487 | 0.78641151 |

|        |                    |            |            |            |            |            |
|--------|--------------------|------------|------------|------------|------------|------------|
| P62889 | 60S ribosoma       | 5.39687734 | 21.0867436 | 1.98983246 | 0.26270971 | 0.7280877  |
| Q8CGK3 | Lon protease       | 1.74211429 | 1.95937474 | 1.82006283 | 1.84208067 | 1.93761327 |
| Q8K1J6 | CCA tRNA nu        | 0.89237484 | 0.73431761 | 0.78512485 | 1.20525774 | 0.56773577 |
| Q61387 | Cytochrome         | 0.73790496 | 1.56457194 | 0.78690925 | 0.81544968 | 0.99635065 |
| Q9CQU0 | Thioredoxin        | 26.2264874 | 2.55176532 | 7.51622888 | 13.0906676 | 39.3631171 |
| P16332 | Methylmalor        | 0.44725504 | 0.49099659 | 0.38285907 | 0.45199786 | 0.42820279 |
| P27773 | Protein disul      | 3.70666935 | 3.41296937 | 3.50783015 | 3.60063897 | 3.47644906 |
| Q3TIU4 | 2',5'-phosph       | 1.42196811 | 21.0867436 | 20.4199188 | 0.58722234 | 1.69141941 |
| Q8BLN5 | Lanosterol sy      | 1.734703   | 0.86567578 | 1.47611136 | 1.83358061 | 1.29474003 |
| P62245 | 40S ribosoma       | 2.9495359  | 5.18511364 | 2.22196236 | 2.0471703  | 4.06794317 |
| Q8VCF0 | Mitochondri        | 5.76201813 | 3.48438722 | 16.0242443 | 1.93246221 | 4.5024163  |
| P51150 | Ras-related p      | 1.42546372 | 1.39539491 | 1.12656355 | 1.25608889 | 1.28022619 |
| Q80UU9 | Membrane-a         | 14.2376259 | 21.0867436 | 10.3291431 | 11.4783591 | 17.5405028 |
| O08528 | Hexokinase-2       | 7.61928561 | 5.32502294 | 3.50554079 | 6.63682917 | 2.71967281 |
| P47758 | Signal recogn      | 12.4253747 | 4.87980897 | 5.27217371 | 5.01424819 | 11.1520223 |
| Q64133 | Amine oxida        | 0.3197348  | 0.31596424 | 0.2946962  | 0.29670342 | 0.30009043 |
| Q9D6S7 | Ribosome-re        | 0.31713191 | 0.49322295 | 0.29333558 | 0.31852694 | 0.33074393 |
| P62918 | 60S ribosoma       | 26.2264874 | 2.11071772 | 2.23628039 | 2.32968959 | 10.501362  |
| Q8VBT0 | Thioredoxin-       | 4.94339133 | 5.15768254 | 3.53694526 | 3.12108296 | 3.79321041 |
| Q9DC61 | Mitochondri        | 0.83704184 | 0.82008898 | 0.92211452 | 0.73566018 | 0.89119587 |
| Q14CH7 | Alanine--tRN       | 0.68376514 | 0.54862317 | 0.67589974 | 0.59396078 | 0.46229921 |
| P67778 | Prohibitin OS      | 0.77892193 | 0.84353098 | 0.77757188 | 0.82510288 | 0.80788688 |
| Q99M04 | Lipoyl syntha      | 0.61247365 | 0.38002375 | 0.39938659 | 0.34880843 | 0.31472283 |
| Q99JB2 | Stomatin-like      | 1.39686367 | 1.55959665 | 1.32510663 | 1.53749529 | 1.42714199 |
| Q9CR98 | Protein FAM        | 0.44762712 | 0.35122363 | 0.3495146  | 0.37229786 | 0.40982355 |
| P97742 | Carnitine O- $\pi$ | 2.03952649 | 1.75838609 | 1.12555218 | 1.17237861 | 1.4999993  |
| Q8BH95 | Enoyl-CoA hy       | 0.30181501 | 0.33676032 | 0.30893429 | 0.28926354 | 0.27771714 |
| Q62167 | ATP-depende        | 26.2264874 | 0.57517888 | 1.24332392 | 1.08383769 | 0.42790651 |
| O35857 | Mitochondri        | 1.07700287 | 1.11234917 | 1.16604154 | 1.33272671 | 1.00781853 |
| Q99N87 | 28S ribosoma       | 1.13122074 | 4.97688864 | 1.24740926 | 1.1825691  | 2.783974   |
| Q8VDC0 | Probable leu       | 0.89861903 | 0.32757624 | 0.35315564 | 0.39998414 | 0.41680943 |
| Q9WUR2 | Enoyl-CoA de       | 0.65750829 | 0.47307259 | 0.5155594  | 0.7459323  | 0.57200365 |
| Q8BH55 | Threonine sy       | 0.17487092 | 0.15160449 | 0.18680671 | 0.20862932 | 0.18408369 |
| Q8VEG4 | Exonuclease        | 1.15085191 | 1.7194453  | 1.13257643 | 0.94760093 | 1.18929976 |
| Q91YN9 | BAG family n       | 13.094327  | 4.59280591 | 4.14478846 | 8.52765378 | 6.38878839 |
| Q9DCC8 | Mitochondri        | 0.44382452 | 0.49512007 | 0.47137412 | 0.53776449 | 0.61021872 |
| Q924L1 | LETM1 doma         | 0.86578165 | 0.6725517  | 0.51384657 | 0.53757889 | 0.83325125 |
| Q60605 | Myosin light       | 7.723177   | 5.29831218 | 10.3551346 | 10.8555676 | 7.03691849 |



| P42 Mouse 2 | P42 Mouse 3 | P42 Mouse 4 | P7 Avg     | P42 Avg    | Log2 P42/P7 | BH          |
|-------------|-------------|-------------|------------|------------|-------------|-------------|
| 0.02906905  | 0.01929496  | 0.0326499   | 0.22686051 | 0.02629807 | 3.1087765   | 4.88742E-12 |
| 0.04273832  | 0.03465486  | 0.03220387  | 0.24689787 | 0.03360441 | 2.87719186  | 4.88742E-12 |
| 0.16515071  | 0.15311306  | 0.16048069  | 0.7495359  | 0.15489405 | 2.27471583  | 4.08914E-10 |
| 0.12959874  | 0.10846332  | 0.07884923  | 0.35640163 | 0.1047173  | 1.76700412  | 2.69029E-09 |
| 0.00290754  | 0.00321175  | 0.07526636  | 0.53990879 | 0.03770866 | 3.83974776  | 4.05884E-09 |
| 0.12058883  | 0.10533811  | 0.11661225  | 0.2677257  | 0.1101562  | 1.28120502  | 6.211E-09   |
| 0.12189995  | 0.10419945  | 0.12848954  | 0.33051791 | 0.11616736 | 1.50852368  | 6.21468E-09 |
| 0.1733424   | 0.14014388  | 0.17234886  | 0.43627298 | 0.16034098 | 1.44408796  | 6.21468E-09 |
| 0.11119431  | 0.09297868  | 0.12070957  | 0.26034935 | 0.10693137 | 1.28376371  | 6.21468E-09 |
| 0.11557303  | 0.10464858  | 0.12326063  | 0.25858399 | 0.11134637 | 1.21557845  | 6.21468E-09 |
| 0.1466912   | 0.08963977  | 0.07437076  | 0.29053317 | 0.1075726  | 1.4333922   | 6.21468E-09 |
| 0.25928821  | 0.22659226  | 0.26503764  | 0.77878582 | 0.24472692 | 1.67005378  | 6.21468E-09 |
| 0.11201059  | 0.12227241  | 0.11121403  | 0.3085664  | 0.11883906 | 1.37657182  | 6.82501E-09 |
| 0.18327028  | 0.14583183  | 0.1730723   | 0.4421035  | 0.17190314 | 1.36278826  | 9.34173E-09 |
| 0.18353703  | 0.16061899  | 0.20927139  | 0.4410091  | 0.18468776 | 1.25572015  | 1.18238E-08 |
| 0.13427073  | 0.09440144  | 0.10880529  | 0.21670795 | 0.10878431 | 0.99428158  | 1.18238E-08 |
| 0.16908093  | 0.17861137  | 0.19864963  | 0.41014229 | 0.17945748 | 1.19248242  | 1.38878E-08 |
| 0.40024083  | 0.34254166  | 0.40204281  | 0.17220034 | 0.38321573 | -1.1540688  | 1.38878E-08 |
| 0.1850614   | 0.15120524  | 0.18803751  | 0.38031747 | 0.17426505 | 1.12592093  | 4.0174E-08  |
| 0.21775424  | 0.24017253  | 0.17675393  | 0.46050738 | 0.21170614 | 1.12116115  | 4.0174E-08  |
| 0.09499061  | 0.07922873  | 0.10824008  | 0.22556698 | 0.09731254 | 1.21285826  | 4.4552E-08  |
| 0.20416958  | 0.18041678  | 0.15841026  | 0.64939352 | 0.18237294 | 1.83220133  | 4.4552E-08  |
| 0.12995189  | 0.11109711  | 0.13474807  | 0.21907188 | 0.12393187 | 0.82185712  | 7.44793E-08 |
| 0.06616485  | 0.07138284  | 0.05144951  | 0.15706968 | 0.05531304 | 1.5057131   | 7.51569E-08 |
| 0.10862387  | 0.09931742  | 0.10865722  | 0.18645772 | 0.10579719 | 0.81754717  | 7.51569E-08 |
| 0.30990064  | 0.27756764  | 0.30765712  | 0.67953422 | 0.2990759  | 1.18403456  | 7.9937E-08  |
| 0.05541451  | 0.05287679  | 0.05230908  | 0.12506396 | 0.05258431 | 1.2499618   | 1.47764E-07 |
| 0.1550891   | 0.13015735  | 0.16466957  | 0.29337957 | 0.14843145 | 0.9829716   | 1.47764E-07 |
| 0.09447217  | 0.08850775  | 0.10764994  | 0.18002076 | 0.09599697 | 0.90710249  | 1.48138E-07 |
| 0.07346758  | 0.06252334  | 0.06915499  | 0.5107707  | 0.06676673 | 2.93547438  | 1.55193E-07 |
| 0.09458314  | 0.08218594  | 0.09794026  | 0.17187509 | 0.0906537  | 0.92292275  | 2.16786E-07 |
| 0.06517816  | 0.05447777  | 0.07397342  | 0.13867082 | 0.06402341 | 1.11499291  | 2.32984E-07 |
| 0.21079891  | 0.17533035  | 0.21959532  | 0.39236013 | 0.19892273 | 0.97997033  | 2.81574E-07 |
| 0.12283358  | 0.11959369  | 0.10886708  | 0.1973463  | 0.11624142 | 0.76360519  | 4.21282E-07 |
| 0.11371927  | 0.09869392  | 0.11710444  | 0.1853332  | 0.10944715 | 0.75988694  | 4.57302E-07 |
| 0.11846513  | 0.0947653   | 0.12351265  | 0.18688293 | 0.11136424 | 0.74684879  | 4.57302E-07 |
| 0.12526006  | 0.12357263  | 0.12786475  | 0.2205702  | 0.12644061 | 0.80277795  | 5.02073E-07 |
| 0.14179868  | 0.13448588  | 0.13641354  | 0.24715605 | 0.13293685 | 0.89468113  | 5.02073E-07 |
| 0.33877817  | 0.31880509  | 0.33107192  | 0.68259657 | 0.33288306 | 1.03601772  | 5.75116E-07 |
| 0.10279883  | 0.09180383  | 0.0975583   | 0.17104129 | 0.09495759 | 0.84898939  | 7.03083E-07 |
| 0.38182843  | 0.36250981  | 0.32716271  | 0.20773566 | 0.35152228 | -0.7588672  | 8.0106E-07  |

|            |            |            |            |            |            |             |
|------------|------------|------------|------------|------------|------------|-------------|
| 0.16507459 | 0.12074313 | 0.18129241 | 0.31370249 | 0.15658979 | 1.0024068  | 8.43501E-07 |
| 0.09251094 | 0.08962372 | 0.10555217 | 0.16832805 | 0.09339001 | 0.84993538 | 1.10274E-06 |
| 0.12633272 | 0.10712423 | 0.12487644 | 0.19453902 | 0.12074932 | 0.68804446 | 1.30103E-06 |
| 0.13866904 | 0.11111396 | 0.13079272 | 0.23111944 | 0.12621494 | 0.87275589 | 1.46419E-06 |
| 0.33138261 | 0.2992075  | 0.3732793  | 0.19125254 | 0.33045186 | -0.7889612 | 1.46419E-06 |
| 0.09686827 | 0.08376448 | 0.10190228 | 0.16286624 | 0.09092494 | 0.84093969 | 1.75336E-06 |
| 0.21447451 | 0.20374221 | 0.24068733 | 0.40447118 | 0.22384562 | 0.85353279 | 1.85394E-06 |
| 0.13382293 | 0.13137226 | 0.1317543  | 0.21740181 | 0.12947574 | 0.74768217 | 1.85394E-06 |
| 0.15200922 | 0.1337604  | 0.16119619 | 0.27974246 | 0.15030718 | 0.89618534 | 1.99136E-06 |
| 0.18767728 | 0.16200856 | 0.16720402 | 0.33322549 | 0.16917678 | 0.97796719 | 2.04102E-06 |
| 0.13482473 | 0.11060511 | 0.13135966 | 0.21047781 | 0.12569675 | 0.74372082 | 2.04102E-06 |
| 0.10899644 | 0.10906506 | 0.10025086 | 0.17475593 | 0.10431574 | 0.74438458 | 2.37018E-06 |
| 0.09950573 | 0.0845188  | 0.09324936 | 0.16369737 | 0.09119715 | 0.84397054 | 2.38157E-06 |
| 0.14142435 | 0.10374563 | 0.1362033  | 0.21154298 | 0.12525406 | 0.75609342 | 2.73259E-06 |
| 0.34766794 | 0.34568395 | 0.33082998 | 0.6646621  | 0.33899423 | 0.97136037 | 3.02867E-06 |
| 0.23317463 | 0.19034205 | 0.23519421 | 0.37603535 | 0.2161121  | 0.79908843 | 3.07989E-06 |
| 0.22538805 | 0.19731601 | 0.22065225 | 0.37276017 | 0.21207225 | 0.81369187 | 3.42535E-06 |
| 0.20842259 | 0.18863062 | 0.21476528 | 0.38700312 | 0.1851673  | 1.06351583 | 3.42535E-06 |
| 0.13721335 | 0.12572058 | 0.14685701 | 0.22238097 | 0.13526663 | 0.7172273  | 3.42535E-06 |
| 0.18079843 | 0.140287   | 0.1887814  | 0.32231367 | 0.16868798 | 0.9341082  | 3.82E-06    |
| 0.13107174 | 0.12005063 | 0.14553351 | 0.21346749 | 0.13175929 | 0.69611172 | 3.82E-06    |
| 0.25365578 | 0.23292368 | 0.26244801 | 0.42996469 | 0.24906102 | 0.78771896 | 4.5284E-06  |
| 0.10132787 | 0.11097153 | 0.119824   | 0.18232113 | 0.11161527 | 0.70794735 | 4.64402E-06 |
| 0.1034887  | 0.07880384 | 0.10071856 | 0.16394359 | 0.09145096 | 0.84212932 | 4.79599E-06 |
| 0.2436818  | 0.18222519 | 0.22374389 | 0.36633129 | 0.21485303 | 0.76979881 | 4.79599E-06 |
| 0.05325748 | 0.04423059 | 0.05631305 | 0.1154353  | 0.05220087 | 1.14493881 | 4.96407E-06 |
| 0.44036758 | 0.3714733  | 0.48368568 | 0.75828353 | 0.42198323 | 0.84555173 | 5.37428E-06 |
| 0.13154648 | 0.12720206 | 0.14291931 | 0.22435934 | 0.13036652 | 0.78323788 | 5.37428E-06 |
| 0.31708663 | 0.27789763 | 0.3493729  | 0.58645649 | 0.31116699 | 0.91433507 | 5.46039E-06 |
| 0.14655723 | 0.12290315 | 0.15180697 | 0.22434738 | 0.13862171 | 0.69458109 | 5.86997E-06 |
| 0.26967653 | 0.24324045 | 0.28458778 | 0.44028842 | 0.2633878  | 0.74126037 | 5.91948E-06 |
| 1.05779603 | 1.11100497 | 1.00146001 | 0.39227455 | 0.99980084 | -1.349777  | 6.19264E-06 |
| 0.14079221 | 0.07897786 | 0.15816442 | 0.25985682 | 0.1355813  | 0.93855867 | 6.28649E-06 |
| 0.10545628 | 0.10121574 | 0.09929903 | 0.18132496 | 0.10255278 | 0.82221098 | 6.46177E-06 |
| 0.20764539 | 0.16621286 | 0.21147768 | 0.35675536 | 0.19376916 | 0.88059612 | 6.80183E-06 |
| 0.22895591 | 0.17327326 | 0.22208316 | 0.49681613 | 0.20781958 | 1.25738038 | 7.21941E-06 |
| 0.12471854 | 0.11168405 | 0.14613036 | 0.20827768 | 0.12881787 | 0.69317542 | 8.51908E-06 |
| 0.20218397 | 0.16587138 | 0.20294801 | 0.32921034 | 0.18758556 | 0.81146084 | 9.41663E-06 |
| 0.19783272 | 0.17842861 | 0.16459195 | 0.34915962 | 0.180667   | 0.95055373 | 1.08298E-05 |
| 0.16130708 | 0.13891104 | 0.15889608 | 0.24677285 | 0.15236453 | 0.69565653 | 1.08298E-05 |
| 0.09083267 | 0.07779457 | 0.09119642 | 0.1426135  | 0.08496483 | 0.74717295 | 1.14003E-05 |
| 0.24314742 | 0.20467509 | 0.26613378 | 0.39672466 | 0.23554857 | 0.75211352 | 1.14601E-05 |

|            |            |            |            |            |            |             |
|------------|------------|------------|------------|------------|------------|-------------|
| 0.27495926 | 0.24255101 | 0.29326073 | 0.44304229 | 0.26921819 | 0.71866853 | 1.16633E-05 |
| 0.55667265 | 0.78941996 | 0.77813596 | 0.32257508 | 0.77765286 | -1.2694913 | 1.16633E-05 |
| 0.10869611 | 0.12712256 | 0.12409745 | 0.18431804 | 0.11582176 | 0.67029099 | 1.23889E-05 |
| 0.3603243  | 0.28129538 | 0.37263753 | 0.60416516 | 0.33298916 | 0.8594678  | 1.47963E-05 |
| 0.24164837 | 0.16824908 | 0.11512412 | 0.94130549 | 0.17369324 | 2.43812137 | 1.64692E-05 |
| 0.29049878 | 0.25432828 | 0.28820849 | 0.44016547 | 0.27520756 | 0.67752589 | 1.64692E-05 |
| 0.4305277  | 0.39903699 | 0.44146098 | 0.75284746 | 0.42700044 | 0.81812003 | 1.72278E-05 |
| 0.20277172 | 0.18326781 | 0.20409938 | 0.32811576 | 0.19472409 | 0.75277349 | 1.94921E-05 |
| 0.21669957 | 0.1798861  | 0.22118913 | 0.34817194 | 0.20521536 | 0.76266122 | 2.02243E-05 |
| 1.14319987 | 1.04222551 | 0.95607779 | 0.45409808 | 1.08367028 | -1.25485   | 2.04394E-05 |
| 0.19436361 | 0.23772774 | 0.15603536 | 0.49320242 | 0.18202144 | 1.43807145 | 2.13323E-05 |
| 0.13832999 | 0.11478882 | 0.14742396 | 0.20433946 | 0.1309353  | 0.64211374 | 2.27678E-05 |
| 0.60151985 | 0.51920671 | 0.58238856 | 0.31640668 | 0.58094789 | -0.8766287 | 2.33992E-05 |
| 0.2951     | 0.24709389 | 0.31217188 | 0.46244602 | 0.28165688 | 0.71534624 | 3.12508E-05 |
| 0.41840368 | 0.42644879 | 0.42172704 | 1.03836812 | 0.42379792 | 1.29286959 | 3.26807E-05 |
| 0.24586728 | 0.41945076 | 0.28461197 | 0.17825212 | 0.32331228 | -0.8590091 | 3.30675E-05 |
| 0.4588168  | 0.48869986 | 0.48305712 | 0.28836472 | 0.47468774 | -0.7190841 | 3.37016E-05 |
| 0.21998548 | 0.14032461 | 0.24124385 | 0.34014845 | 0.20018704 | 0.76481591 | 3.59175E-05 |
| 0.12384203 | 0.10128024 | 0.13563733 | 0.17911706 | 0.11807891 | 0.60115143 | 4.36789E-05 |
| 0.05811965 | 0.05637399 | 0.05818209 | 0.10489392 | 0.05559421 | 0.9159245  | 4.38981E-05 |
| 0.13558638 | 0.12038652 | 0.15204102 | 0.20222498 | 0.13304688 | 0.60402649 | 5.15537E-05 |
| 0.08935497 | 0.09209523 | 0.08498896 | 0.13870769 | 0.08652723 | 0.68082172 | 5.84041E-05 |
| 0.09704622 | 0.0952605  | 0.1121841  | 0.15488506 | 0.10075152 | 0.62039642 | 6.98597E-05 |
| 0.20415653 | 0.19441307 | 0.21128421 | 0.32554386 | 0.20420815 | 0.67281145 | 6.98597E-05 |
| 0.31584045 | 0.28002366 | 0.33298092 | 0.60291832 | 0.29798722 | 1.0167121  | 7.32627E-05 |
| 0.29241453 | 0.25461145 | 0.30325993 | 0.47627392 | 0.27930316 | 0.76995966 | 8.82711E-05 |
| 0.4549953  | 0.47284121 | 0.49707627 | 0.73143433 | 0.44150649 | 0.72829371 | 0.000115963 |
| 0.29347605 | 0.24782632 | 0.31219121 | 0.46491166 | 0.28056549 | 0.72861901 | 0.000157048 |
| 0.25758906 | 0.25294378 | 0.29674477 | 0.447411   | 0.26854368 | 0.73644394 | 0.000224201 |
| 0.30026196 | 0.25965018 | 0.32000011 | 0.48292795 | 0.28988744 | 0.73631514 | 0.000243289 |
| 0.35568603 | 0.30730027 | 0.36284961 | 0.56532389 | 0.33874993 | 0.73885702 | 0.000246151 |
| 0.28926909 | 0.2580726  | 0.30443305 | 0.4645621  | 0.28437929 | 0.70805506 | 0.000247799 |
| 0.31090735 | 0.2457855  | 0.36812691 | 0.45731055 | 0.30108728 | 0.60299245 | 0.000264826 |
| 0.31187476 | 0.2405655  | 0.32941217 | 0.47902705 | 0.2900958  | 0.72357768 | 0.000281709 |
| 0.42879363 | 0.49792773 | 0.45164227 | 0.29173079 | 0.44688167 | -0.6152552 | 0.000281709 |
| 0.08139253 | 0.09136321 | 0.0913338  | 0.13173258 | 0.08650202 | 0.60680635 | 0.000363144 |
| 0.3079244  | 0.25110332 | 0.34184213 | 0.47707966 | 0.29482892 | 0.69435213 | 0.000363144 |
| 0.37104345 | 0.32750025 | 0.3643445  | 0.5629605  | 0.34591144 | 0.70263097 | 0.000377313 |
| 0.37046736 | 0.30307478 | 0.39042907 | 0.55443387 | 0.34919007 | 0.66700284 | 0.000377313 |
| 1.82143223 | 1.49646932 | 2.1474953  | 0.58121307 | 1.86184201 | -1.6795916 | 0.000415953 |
| 0.72681846 | 0.76809967 | 0.58589273 | 0.389358   | 0.65438589 | -0.7490444 | 0.00043423  |
| 0.26944364 | 0.22916774 | 0.27474809 | 0.36900115 | 0.25369587 | 0.54052531 | 0.000442057 |

|            |            |            |            |            |            |             |
|------------|------------|------------|------------|------------|------------|-------------|
| 0.17803876 | 0.1654565  | 0.18048078 | 0.24304195 | 0.16832941 | 0.52991805 | 0.000442057 |
| 0.4249904  | 0.36209673 | 0.42673922 | 0.62000876 | 0.40211219 | 0.62469053 | 0.000445827 |
| 0.50788607 | 0.41701873 | 0.49518606 | 1.00546224 | 0.47721223 | 1.07515598 | 0.000453918 |
| 0.50357859 | 0.39619073 | 0.45461791 | 1.67172971 | 0.43631554 | 1.93789783 | 0.000523317 |
| 0.31259806 | 0.24266832 | 0.28872447 | 0.64112066 | 0.27297634 | 1.23181999 | 0.000560089 |
| 0.38854415 | 0.2803029  | 0.31281332 | 2.35152613 | 0.31745501 | 2.88897331 | 0.000566979 |
| 0.15672984 | 0.15706725 | 0.16982328 | 0.26762071 | 0.1745129  | 0.6168561  | 0.000583468 |
| 0.31517729 | 0.29850208 | 0.29683292 | 0.49484567 | 0.29357776 | 0.75323595 | 0.000623628 |
| 0.43994095 | 0.41334551 | 0.46604338 | 0.6909425  | 0.44962144 | 0.61985482 | 0.000667397 |
| 0.51898406 | 0.48492809 | 0.44718268 | 1.16917616 | 0.4764866  | 1.29498477 | 0.000669936 |
| 0.20086662 | 0.21683339 | 0.23323956 | 0.33609752 | 0.22914478 | 0.55262052 | 0.000679336 |
| 0.30807115 | 0.2700285  | 0.25674999 | 0.39890189 | 0.27670454 | 0.52768766 | 0.000682316 |
| 0.1596828  | 0.12334307 | 0.14052152 | 0.8502461  | 0.13439961 | 2.66135151 | 0.000734118 |
| 0.50629609 | 0.42752673 | 0.40064079 | 0.69729895 | 0.44245973 | 0.65623114 | 0.000735745 |
| 0.33411802 | 0.24505623 | 0.3321949  | 0.46777649 | 0.29622327 | 0.6591344  | 0.000755909 |
| 0.75561665 | 0.64914518 | 0.77491558 | 0.44940334 | 0.72495413 | -0.6898789 | 0.000865584 |
| 0.23897069 | 0.21742433 | 0.21455034 | 0.32931709 | 0.2249324  | 0.54998592 | 0.000878518 |
| 0.37818557 | 0.41574163 | 0.41771797 | 0.7580378  | 0.38886666 | 0.96299425 | 0.000902409 |
| 0.32344944 | 0.28466625 | 0.31874887 | 0.49653912 | 0.30610602 | 0.69787597 | 0.0009272   |
| 0.58256913 | 0.483968   | 0.54782746 | 0.34887635 | 0.52574028 | -0.5916345 | 0.001040134 |
| 0.25012854 | 0.23315355 | 0.23525298 | 0.34014622 | 0.23770575 | 0.51697829 | 0.001104795 |
| 0.48811584 | 0.42757734 | 0.50414917 | 0.69524934 | 0.47008268 | 0.56461593 | 0.001163324 |
| 0.12664881 | 0.1216522  | 0.12605522 | 0.27752597 | 0.12602912 | 1.13886569 | 0.001213869 |
| 0.94803033 | 1.13353345 | 1.14415754 | 0.60245501 | 1.05993105 | -0.815045  | 0.00125877  |
| 0.99798144 | 0.94334959 | 1.02343772 | 0.56887805 | 0.98046275 | -0.7853434 | 0.00125877  |
| 0.60422982 | 0.61277041 | 0.60749196 | 0.40361649 | 0.60519741 | -0.5844207 | 0.001293669 |
| 0.76032411 | 0.59436235 | 0.61711906 | 2.33412612 | 0.63374411 | 1.88091019 | 0.001347078 |
| 0.21466136 | 0.00321175 | 0.1294811  | 0.2055812  | 0.11120078 | 0.88654141 | 0.001535141 |
| 0.26086454 | 0.15349513 | 0.29331867 | 0.35393042 | 0.22963534 | 0.62412108 | 0.001553209 |
| 0.35027098 | 0.30877593 | 0.3413245  | 0.49006195 | 0.33054411 | 0.56812132 | 0.001553209 |
| 0.51542373 | 0.44169906 | 0.33294044 | 2.13574112 | 0.42194192 | 2.33962045 | 0.001627092 |
| 0.44713772 | 0.40828086 | 0.46331407 | 0.67481904 | 0.43246527 | 0.64191639 | 0.001627092 |
| 0.75697042 | 0.51405515 | 0.6923145  | 2.72795203 | 0.62377111 | 2.12872964 | 0.001666049 |
| 0.28579813 | 0.21311957 | 0.27807347 | 0.41956113 | 0.28225504 | 0.57188168 | 0.001883666 |
| 0.09434445 | 0.09809413 | 0.13966711 | 0.17099974 | 0.10942819 | 0.64400964 | 0.001906584 |
| 1.34885797 | 2.16266257 | 1.93271748 | 0.69909973 | 1.92922703 | -1.4644527 | 0.00190949  |
| 4.21033705 | 3.98621615 | 5.94882597 | 1.34073477 | 4.83739119 | -1.8512053 | 0.001923748 |
| 0.47623722 | 0.43976128 | 0.45874315 | 0.67763242 | 0.45521956 | 0.57394036 | 0.001931417 |
| 0.06317568 | 0.05373728 | 0.07222123 | 0.1252533  | 0.06126016 | 1.03182746 | 0.002078591 |
| 0.07184141 | 0.07380976 | 0.05748044 | 0.10438429 | 0.06575271 | 0.66678239 | 0.002078591 |
| 0.52084003 | 0.47931586 | 0.53976917 | 0.71807772 | 0.51012883 | 0.49327839 | 0.002078591 |
| 0.31361015 | 0.27630133 | 0.34966293 | 0.44402314 | 0.31763337 | 0.48327238 | 0.002340874 |

|            |            |            |            |            |            |             |
|------------|------------|------------|------------|------------|------------|-------------|
| 0.44257022 | 0.36048515 | 0.47358559 | 0.60470271 | 0.42365788 | 0.51332633 | 0.002436296 |
| 1.00202265 | 0.9509668  | 1.21361737 | 0.59637077 | 0.99885119 | -0.7440602 | 0.002443901 |
| 0.40199989 | 0.3287414  | 0.39932969 | 0.26780644 | 0.36617763 | -0.451353  | 0.002559403 |
| 0.55904821 | 0.48840195 | 0.60169689 | 0.76210682 | 0.53640219 | 0.50667811 | 0.002615464 |
| 0.2817302  | 0.34769777 | 0.27503836 | 0.49757121 | 0.27860333 | 0.8366905  | 0.002702947 |
| 0.34239482 | 0.30950897 | 0.33793702 | 0.46334967 | 0.33046925 | 0.48758533 | 0.00270517  |
| 1.60202852 | 1.71425861 | 1.2652514  | 0.76567975 | 1.44175348 | -0.9130115 | 0.002967238 |
| 0.19989828 | 0.19373547 | 0.25552731 | 0.32426731 | 0.20454702 | 0.66475106 | 0.003192178 |
| 2.03746429 | 2.31442799 | 1.36849024 | 0.73144431 | 1.77578933 | -1.2796405 | 0.003240858 |
| 0.54821031 | 0.45551471 | 0.47195296 | 0.86303878 | 0.48854524 | 0.82093321 | 0.003679441 |
| 0.35564981 | 0.30993003 | 0.33986807 | 0.46715995 | 0.33422251 | 0.48310771 | 0.004218656 |
| 0.65579028 | 0.78893708 | 0.42832562 | 1.07532323 | 0.57410892 | 0.905374   | 0.004391556 |
| 0.54826612 | 0.41505166 | 0.49415763 | 0.8523123  | 0.48789355 | 0.80481574 | 0.004425393 |
| 6.99812907 | 4.34890997 | 4.26451252 | 1.18461422 | 4.54324522 | -1.9393059 | 0.004678091 |
| 0.36786196 | 0.30668216 | 0.36814168 | 0.44505012 | 0.34429161 | 0.37033678 | 0.004693978 |
| 1.13248893 | 1.00919167 | 0.87370239 | 0.61625415 | 1.15257334 | -0.9032612 | 0.004928865 |
| 0.64359643 | 0.52069236 | 0.52294953 | 0.92525142 | 0.5470781  | 0.75809864 | 0.004967414 |
| 1.57441101 | 2.18966796 | 2.42852697 | 0.8101416  | 1.98220055 | -1.2908569 | 0.005028595 |
| 0.0095519  | 0.00759453 | 0.00922648 | 0.03969514 | 0.00903512 | 2.13534588 | 0.00520494  |
| 0.25131618 | 0.15033912 | 0.3490282  | 0.38487137 | 0.26258366 | 0.55159921 | 0.005257115 |
| 0.52983433 | 0.62715834 | 0.3790805  | 0.3661761  | 0.58371819 | -0.6727344 | 0.0055453   |
| 0.27268496 | 0.22714007 | 0.29082423 | 0.34259834 | 0.25548865 | 0.42325899 | 0.005774216 |
| 0.36289854 | 0.29721029 | 0.35967798 | 0.46525757 | 0.33953318 | 0.45447705 | 0.006267271 |
| 4.28493429 | 4.68656742 | 5.04724138 | 1.75321041 | 4.90175902 | -1.4833004 | 0.006267271 |
| 0.77849122 | 0.91178782 | 0.94045022 | 0.58017413 | 0.88226955 | -0.6047335 | 0.006267271 |
| 0.12774329 | 0.08337066 | 0.10531418 | 1.52149155 | 0.09704912 | 3.97062741 | 0.006661412 |
| 1.00943889 | 1.2793813  | 0.90392959 | 0.67599926 | 1.105788   | -0.7099813 | 0.006677721 |
| 0.26961807 | 0.32985544 | 0.27381844 | 0.18604333 | 0.26261237 | -0.4972962 | 0.006677721 |
| 0.95860554 | 1.36851003 | 0.89969715 | 0.67297187 | 1.08387374 | -0.6875786 | 0.006707614 |
| 0.47970958 | 0.39982685 | 0.38500925 | 1.14909159 | 0.44106116 | 1.38144317 | 0.007046408 |
| 0.79953564 | 0.55194022 | 0.6074471  | 1.31217947 | 0.62885722 | 1.06116067 | 0.00711791  |
| 4.40446795 | 3.52679976 | 3.97245603 | 1.74678469 | 4.09774248 | -1.2301275 | 0.007586154 |
| 0.16008942 | 0.1463927  | 0.33936344 | 0.11774269 | 0.20554292 | -0.8038022 | 0.007825073 |
| 0.16184759 | 0.13392361 | 0.16443365 | 0.19772452 | 0.14989813 | 0.39950946 | 0.008264229 |
| 0.51973664 | 0.51757404 | 0.55333279 | 0.79397348 | 0.53798897 | 0.56151423 | 0.008264229 |
| 1.27784781 | 0.9132843  | 1.19072256 | 0.75806022 | 1.28743242 | -0.7641123 | 0.008266101 |
| 1.55089882 | 1.30801128 | 1.78392798 | 0.85181225 | 1.48460522 | -0.801472  | 0.008402353 |
| 1.2964529  | 0.93038054 | 1.06662476 | 0.70171348 | 1.1163547  | -0.6698415 | 0.008791899 |
| 1.06417398 | 0.97036401 | 0.81474839 | 0.6378313  | 0.96211346 | -0.5930321 | 0.008807418 |
| 0.36577304 | 0.3218307  | 0.39534449 | 0.50860723 | 0.35152588 | 0.53292104 | 0.008923464 |
| 0.51821314 | 0.48817563 | 0.39411811 | 1.41413174 | 0.4541459  | 1.63868877 | 0.008945071 |
| 1.05108928 | 1.33372195 | 1.16243271 | 0.73341044 | 1.16491685 | -0.6675343 | 0.0098486   |

|            |            |            |            |            |            |             |
|------------|------------|------------|------------|------------|------------|-------------|
| 0.54119984 | 0.12584326 | 0.18272489 | 0.14906349 | 0.31504631 | -1.079637  | 0.010222322 |
| 1.95920995 | 1.78643459 | 1.61082654 | 0.9325457  | 1.7311086  | -0.8924499 | 0.010222322 |
| 0.36369948 | 0.3338464  | 0.34530086 | 0.51190108 | 0.33746206 | 0.60113972 | 0.010495388 |
| 1.26682867 | 1.33638505 | 1.45620547 | 0.84027026 | 1.33393163 | -0.6667594 | 0.010798925 |
| 0.22355857 | 0.26555383 | 0.24423409 | 0.34652804 | 0.22070933 | 0.65082447 | 0.011193354 |
| 1.94291409 | 1.56371853 | 1.84418107 | 0.938255   | 1.77564403 | -0.9202904 | 0.011193354 |
| 1.19787389 | 1.23967549 | 1.8854969  | 0.9227113  | 1.59619849 | -0.7906888 | 0.011950562 |
| 0.74841308 | 1.07846006 | 1.19678821 | 0.57961485 | 0.92795245 | -0.6789563 | 0.012245669 |
| 0.57549426 | 0.49601919 | 0.56987895 | 0.39904534 | 0.53505973 | -0.4231473 | 0.012575818 |
| 0.98663489 | 1.4980057  | 0.78291957 | 0.63905888 | 1.04811409 | -0.713775  | 0.012654631 |
| 0.60739127 | 0.74101564 | 0.91919966 | 0.51548836 | 0.75248042 | -0.5457142 | 0.01270342  |
| 1.44599676 | 1.28900835 | 1.15393515 | 3.35335492 | 1.27327375 | 1.39706256 | 0.012913447 |
| 1.4705532  | 1.64358271 | 1.45615018 | 0.91584441 | 1.518904   | -0.7298563 | 0.013698131 |
| 0.20399571 | 0.18289514 | 0.18597864 | 0.25801874 | 0.19859412 | 0.37765296 | 0.014111032 |
| 1.96773977 | 1.87229176 | 2.69975686 | 1.04575732 | 2.22636529 | -1.0901422 | 0.014146506 |
| 0.33194647 | 0.30126715 | 0.30796637 | 0.41906586 | 0.30328816 | 0.46648781 | 0.014196703 |
| 0.20146462 | 0.17917146 | 0.19798607 | 0.29469251 | 0.19342728 | 0.60741912 | 0.014196703 |
| 0.47333814 | 0.52695677 | 0.55630714 | 0.88415613 | 0.50342144 | 0.81253451 | 0.014332458 |
| 0.9185923  | 0.90160438 | 1.00685795 | 1.87526789 | 0.95866111 | 0.96800389 | 0.014393307 |
| 0.07654935 | 0.07127595 | 0.11442815 | 0.11560985 | 0.08373569 | 0.4653498  | 0.014508842 |
| 1.74594476 | 2.40581228 | 1.27404089 | 0.91170972 | 2.09424567 | -1.1997842 | 0.014508842 |
| 0.32395604 | 0.23279618 | 0.26553944 | 0.47566865 | 0.28450033 | 0.74152659 | 0.01460387  |
| 0.20520007 | 0.16985384 | 0.20754493 | 0.14639483 | 0.19209346 | -0.3919438 | 0.014649765 |
| 0.54110566 | 0.56758136 | 0.36090444 | 0.68877383 | 0.4991703  | 0.46449823 | 0.015397577 |
| 0.18486297 | 0.13638343 | 0.16546157 | 0.21355578 | 0.16563318 | 0.36662122 | 0.015449722 |
| 4.94834698 | 2.14917864 | 8.35040705 | 1.43227539 | 4.63143898 | -1.6931516 | 0.015480451 |
| 0.04373345 | 0.04803162 | 0.04482933 | 0.07009227 | 0.04279889 | 0.71168213 | 0.015544042 |
| 0.84531057 | 0.87397553 | 0.86420371 | 3.61542229 | 0.79218472 | 2.19025539 | 0.015544042 |
| 1.68799886 | 1.3474886  | 1.54875546 | 0.92327964 | 1.54785803 | -0.7454336 | 0.015826661 |
| 1.59900904 | 1.3501883  | 1.55565528 | 0.94211848 | 1.48214183 | -0.6537031 | 0.016097996 |
| 1.04734393 | 0.89244964 | 1.08187812 | 0.69942967 | 1.0238354  | -0.5497329 | 0.017041883 |
| 0.4277691  | 0.37429196 | 0.45912874 | 0.5600836  | 0.4226715  | 0.40610534 | 0.018592482 |
| 1.53542442 | 1.3718145  | 1.59612005 | 0.90700638 | 1.73357203 | -0.9345632 | 0.018592482 |
| 1.34578857 | 0.95776168 | 1.60157336 | 3.11637195 | 1.17499301 | 1.40721526 | 0.018596659 |
| 0.44859599 | 0.63085151 | 0.51398414 | 1.61235327 | 0.59303378 | 1.4429817  | 0.019652693 |
| 0.23605556 | 0.00321175 | 0.37378975 | 0.02398532 | 0.15424834 | -2.6850313 | 0.020271699 |
| 1.39604954 | 1.17051545 | 1.38845444 | 0.90248251 | 1.37055437 | -0.6027887 | 0.020550864 |
| 2.17332972 | 1.04765607 | 4.65942072 | 0.82354995 | 2.38969542 | -1.5368987 | 0.020984224 |
| 0.86667851 | 0.27188266 | 0.6649735  | 0.90848561 | 0.55149157 | 0.72012481 | 0.021070407 |
| 0.36422659 | 0.53964973 | 0.37601949 | 0.60991417 | 0.41430647 | 0.55790787 | 0.021929687 |
| 0.62323475 | 0.65693544 | 0.65972252 | 1.00277747 | 0.64897623 | 0.62776395 | 0.022183865 |
| 0.50002565 | 0.44006903 | 0.50077822 | 0.62581702 | 0.47846245 | 0.38733517 | 0.023203417 |

|            |            |            |            |            |            |             |
|------------|------------|------------|------------|------------|------------|-------------|
| 0.52626738 | 0.66981375 | 0.57834692 | 1.13329714 | 0.67934025 | 0.73831994 | 0.02328763  |
| 3.03876205 | 1.81062772 | 2.4291764  | 1.09036116 | 2.24885081 | -1.0443819 | 0.02328763  |
| 1.12529542 | 1.06354879 | 1.11880019 | 0.75835248 | 1.11805533 | -0.5600511 | 0.023369194 |
| 1.67799264 | 1.95936493 | 1.37714134 | 0.96388269 | 1.71269102 | -0.8293354 | 0.024881277 |
| 1.1358117  | 0.94312033 | 0.98528185 | 2.25552637 | 0.99094112 | 1.18659292 | 0.027265151 |
| 0.01287534 | 0.0099716  | 0.01223223 | 0.03582148 | 0.01172975 | 1.61065329 | 0.027332312 |
| 7.56444067 | 32.1175034 | 34.7168323 | 2.38430753 | 21.6658724 | -3.1837821 | 0.027466318 |
| 1.70748654 | 6.11428101 | 1.24598694 | 0.77078156 | 2.71191185 | -1.8149163 | 0.028380102 |
| 0.93497974 | 1.0656885  | 0.93343468 | 1.59837093 | 0.92239498 | 0.79314568 | 0.028679301 |
| 0.92569654 | 0.58221088 | 0.64322573 | 1.48793084 | 0.75959808 | 0.9699993  | 0.028713981 |
| 1.73037969 | 1.13210941 | 1.80288676 | 0.96323741 | 1.52524644 | -0.663079  | 0.028858413 |
| 0.47965475 | 0.38554176 | 0.31175399 | 0.54496637 | 0.39739554 | 0.45559152 | 0.029798388 |
| 0.77053261 | 0.6283145  | 0.45153902 | 0.38621455 | 0.55395003 | -0.5203533 | 0.031105901 |
| 1.28514178 | 1.2948021  | 1.12214143 | 0.88994984 | 1.369988   | -0.6223673 | 0.031221407 |
| 0.37222202 | 0.30262209 | 0.38805714 | 0.42416027 | 0.34739287 | 0.28804134 | 0.031274087 |
| 0.42552019 | 0.39406764 | 0.46536747 | 0.57589246 | 0.43244221 | 0.41329209 | 0.031609896 |
| 0.32986008 | 0.33357636 | 0.29807858 | 0.41464787 | 0.33224638 | 0.31963323 | 0.031624634 |
| 0.60957101 | 0.51384614 | 0.61816252 | 0.73479275 | 0.56885767 | 0.36926965 | 0.032377423 |
| 0.20587192 | 0.17318524 | 0.21527631 | 0.15489031 | 0.19622058 | -0.3412295 | 0.032377423 |
| 29.075367  | 10.7621755 | 14.9033972 | 3.0883935  | 20.3582821 | -2.7206873 | 0.032676239 |
| 0.4514994  | 0.3458095  | 0.59433636 | 0.30050114 | 0.4198032  | -0.4823427 | 0.032676239 |
| 0.3808693  | 0.3306502  | 0.40840996 | 0.45546235 | 0.37235789 | 0.29064188 | 0.033125349 |
| 0.58973991 | 0.6876634  | 0.70417883 | 0.91371689 | 0.6225681  | 0.55351557 | 0.033218395 |
| 0.30071116 | 0.30352668 | 0.20066292 | 0.37836377 | 0.27535711 | 0.45847009 | 0.033331639 |
| 0.7739796  | 0.70715228 | 1.39388524 | 1.81834955 | 0.98255819 | 0.88801481 | 0.034459458 |
| 0.84011086 | 1.10795127 | 1.01520345 | 2.05524703 | 0.98624318 | 1.05929649 | 0.034459458 |
| 3.4408035  | 2.62405641 | 2.76579369 | 1.3496945  | 2.74884789 | -1.0261942 | 0.034515165 |
| 3.86326721 | 3.73062438 | 4.52929452 | 2.16011513 | 4.15330105 | -0.9431502 | 0.034733423 |
| 1.04376413 | 1.10471158 | 1.03713042 | 1.87422932 | 1.03722511 | 0.85356844 | 0.035142721 |
| 0.41806356 | 0.39944172 | 0.378865   | 0.31879676 | 0.39109261 | -0.2948733 | 0.035142721 |
| 0.25139587 | 0.28801702 | 0.195655   | 0.30348834 | 0.23955054 | 0.34131098 | 0.036239595 |
| 2.57341049 | 2.62683667 | 2.26165574 | 1.31316811 | 2.57874964 | -0.9736201 | 0.036239595 |
| 6.6706502  | 9.85723566 | 1.74001876 | 1.75798361 | 5.14729482 | -1.5498928 | 0.037223652 |
| 1.33768452 | 1.30136481 | 1.63735609 | 0.92537626 | 1.41131729 | -0.6089304 | 0.037223652 |
| 0.96306282 | 0.87109895 | 1.09006975 | 1.60188497 | 0.94878407 | 0.75561885 | 0.03835654  |
| 1.30532738 | 1.33443808 | 1.13573977 | 0.73986543 | 1.10680029 | -0.5810601 | 0.03936171  |
| 0.41739395 | 0.489698   | 0.43806024 | 0.35125596 | 0.44261979 | -0.3335453 | 0.039388822 |
| 1.24283693 | 1.05046909 | 1.28034815 | 0.80681316 | 1.16728027 | -0.5328445 | 0.039419882 |
| 0.62145812 | 0.57512295 | 0.61085492 | 0.74968789 | 0.59540916 | 0.33240869 | 0.043100002 |
| 0.76383189 | 0.74900591 | 0.77741088 | 0.55140926 | 0.73786955 | -0.4202423 | 0.046744491 |
| 0.21049073 | 0.18001469 | 0.22263984 | 0.2574035  | 0.20341123 | 0.3396323  | 0.047000376 |
| 0.72781107 | 0.73400582 | 0.85767719 | 0.63365827 | 0.92235408 | -0.5416157 | 0.051126977 |

|            |            |            |            |            |            |             |
|------------|------------|------------|------------|------------|------------|-------------|
| 1.47573107 | 1.22157467 | 1.35016341 | 0.9209034  | 1.31125993 | -0.509832  | 0.053248658 |
| 1.26966945 | 1.18840224 | 1.27592982 | 0.88362983 | 1.26828413 | -0.521364  | 0.054502341 |
| 0.23522092 | 0.23601208 | 0.2017744  | 0.26247498 | 0.21751796 | 0.27104537 | 0.054650195 |
| 0.74572024 | 3.24287281 | 0.52457822 | 0.73047566 | 1.52836808 | -1.0650839 | 0.056447827 |
| 0.417631   | 0.42793858 | 0.31225302 | 0.50685369 | 0.39199137 | 0.37074747 | 0.060464588 |
| 1.23427175 | 0.8315047  | 1.22452341 | 1.66605543 | 1.05682581 | 0.65669879 | 0.061635029 |
| 0.70279857 | 0.44492501 | 0.48243923 | 0.86240019 | 0.52755875 | 0.70902574 | 0.062994776 |
| 0.50876412 | 0.48332371 | 1.37199196 | 12.9201212 | 0.73825734 | 4.12935199 | 0.064081418 |
| 3.09893773 | 1.84882962 | 1.63699819 | 4.61639791 | 1.84262699 | 1.32500353 | 0.06453392  |
| 0.96523971 | 0.9236189  | 0.88858493 | 0.70219577 | 0.91913633 | -0.3884056 | 0.065734173 |
| 0.16761011 | 0.20311799 | 0.04092037 | 0.17383546 | 0.12288844 | 0.50037315 | 0.065885581 |
| 0.81973934 | 0.81680462 | 0.93837001 | 0.67034278 | 0.87378762 | -0.3823837 | 0.066276706 |
| 0.63352366 | 0.77111025 | 0.75534263 | 0.61830119 | 0.81942578 | -0.4063035 | 0.066668891 |
| 0.05148085 | 0.10615103 | 0.09291475 | 0.12121506 | 0.09243435 | 0.39106804 | 0.067370451 |
| 1.21850939 | 1.87546392 | 1.33597607 | 3.00341434 | 1.33831878 | 1.16618172 | 0.072064254 |
| 1.88074362 | 1.61706831 | 1.84650198 | 1.14223579 | 1.6948909  | -0.5693319 | 0.072064254 |
| 29.075367  | 1.20004893 | 1.07360884 | 0.79479234 | 17.6780355 | -4.4752362 | 0.074582394 |
| 2.50142804 | 2.29755152 | 4.90700151 | 1.54591827 | 6.01938351 | -1.9611517 | 0.0774368   |
| 1.95347016 | 10.9394524 | 34.7168323 | 0.81891852 | 16.173768  | -4.3037921 | 0.077500722 |
| 0.69002075 | 0.63930005 | 0.66569191 | 0.89826542 | 0.66396428 | 0.43603616 | 0.077818446 |
| 0.62313028 | 3.69025605 | 0.42461208 | 13.1470048 | 1.5976927  | 3.0406723  | 0.077821811 |
| 1.4929769  | 1.3153552  | 1.43271958 | 4.39316597 | 1.28467588 | 1.77385659 | 0.078347202 |
| 0.14180423 | 0.86698477 | 0.27074332 | 1.21614247 | 0.45734498 | 1.41095753 | 0.079213713 |
| 0.74987382 | 2.11855176 | 0.49775168 | 0.48052568 | 0.95308136 | -0.9879858 | 0.079718099 |
| 0.91173596 | 1.92176231 | 3.92395829 | 1.10201519 | 2.18029559 | -0.9843796 | 0.082019544 |
| 1.31542663 | 1.28203383 | 2.30031974 | 2.94676437 | 1.56799479 | 0.91021094 | 0.082339851 |
| 0.69612489 | 0.81921961 | 1.44790797 | 1.52865053 | 1.01318392 | 0.59336254 | 0.084096913 |
| 0.58770866 | 0.50581045 | 0.62026528 | 0.69530209 | 0.5637098  | 0.30268728 | 0.084247508 |
| 1.35065491 | 0.48012057 | 0.51321201 | 0.49433323 | 0.80143935 | -0.6971094 | 0.085254958 |
| 1.18627509 | 1.01557489 | 1.35309989 | 0.84587028 | 1.1959211  | -0.4996139 | 0.087533726 |
| 1.47139559 | 2.55348711 | 1.7695741  | 1.21446563 | 1.93310597 | -0.6705991 | 0.091566367 |
| 0.65620052 | 0.70817194 | 0.57124125 | 0.89653114 | 0.65979661 | 0.44233232 | 0.091662409 |
| 0.45309698 | 32.1175034 | 0.43844322 | 1.89951564 | 18.0930402 | -3.2517314 | 0.091662409 |
| 0.08440513 | 0.07019045 | 0.08741242 | 0.06135352 | 0.07951438 | -0.3740698 | 0.092276453 |
| 2.16746918 | 9.37018215 | 3.49101962 | 2.23910699 | 6.43680738 | -1.5234218 | 0.09247357  |
| 0.87921225 | 2.76751982 | 2.78137192 | 1.16522709 | 2.0287511  | -0.7999807 | 0.092807788 |
| 3.14192068 | 6.01139484 | 0.64978884 | 1.19926577 | 2.79325109 | -1.2197939 | 0.093355775 |
| 0.82461767 | 1.01959166 | 1.53596165 | 0.9292242  | 1.3632492  | -0.5529507 | 0.093794718 |
| 0.82411399 | 0.75806379 | 0.6686793  | 11.9571373 | 0.72034637 | 4.05303745 | 0.094462327 |
| 29.075367  | 32.1175034 | 34.7168323 | 16.6144647 | 33.818205  | -1.0253603 | 0.094962384 |
| 1.02117259 | 0.75019143 | 1.90575454 | 2.18603949 | 1.17146477 | 0.9000059  | 0.098428121 |
| 29.075367  | 32.1175034 | 34.7168323 | 6.91429479 | 24.1744444 | -1.8058287 | 0.098428121 |



|            |            |            |            |            |            |             |
|------------|------------|------------|------------|------------|------------|-------------|
| 1.5609702  | 1.15723283 | 0.98241754 | 0.84799559 | 1.22466188 | -0.5302548 | 0.100330189 |
| 0.4019488  | 0.33020377 | 0.45809058 | 11.9160813 | 0.41952904 | 4.82799538 | 0.100330189 |
| 29.075367  | 32.1175034 | 34.7168323 | 7.11260082 | 24.2030681 | -1.7667408 | 0.10058567  |
| 0.97770599 | 1.05208718 | 1.0694644  | 4.90994917 | 1.02533271 | 2.25961596 | 0.101317917 |
| 29.075367  | 4.28055196 | 34.7168323 | 2.66949216 | 17.5138255 | -2.713857  | 0.101317917 |
| 1.72412789 | 32.1175034 | 2.09375184 | 3.34695417 | 18.8246251 | -2.4917004 | 0.101317917 |
| 5.3616287  | 11.4531899 | 19.9270689 | 4.90725788 | 19.0262512 | -1.9550023 | 0.101317917 |
| 0.26621231 | 0.24623717 | 0.20374224 | 0.33937153 | 0.27234498 | 0.31743027 | 0.101317917 |
| 0.62313541 | 0.5431569  | 0.60842058 | 0.70242058 | 0.58052893 | 0.27496715 | 0.101317917 |
| 18.0488515 | 17.9505117 | 20.3798734 | 6.16452376 | 19.119551  | -1.6329873 | 0.103961226 |
| 1.87377269 | 2.05712096 | 1.41723935 | 12.123488  | 1.65798861 | 2.87029883 | 0.106507699 |
| 0.83514179 | 0.56316062 | 0.74735627 | 1.09981219 | 0.68107788 | 0.69136549 | 0.10730194  |
| 0.34641822 | 0.32265142 | 0.31830346 | 0.38634466 | 0.33372738 | 0.21121838 | 0.108107557 |
| 0.51110756 | 0.49051306 | 0.59528385 | 0.62391759 | 0.51303983 | 0.28228466 | 0.108242651 |
| 0.90654694 | 0.78353762 | 0.83797379 | 1.20202041 | 0.85048632 | 0.49910146 | 0.109516657 |
| 0.3906156  | 0.80337896 | 0.32010361 | 0.39358856 | 0.53016346 | -0.4297489 | 0.11134606  |
| 1.12436263 | 0.77960071 | 0.99499979 | 0.7320905  | 0.93511072 | -0.3531152 | 0.112172932 |
| 29.075367  | 32.1175034 | 18.6959447 | 13.3921142 | 29.8129831 | -1.154557  | 0.115325354 |
| 1.88882465 | 1.58284536 | 1.79478808 | 2.8836359  | 1.75511058 | 0.71632709 | 0.122914647 |
| 0.37221439 | 0.33844077 | 0.45811338 | 0.49929564 | 0.4017572  | 0.31357042 | 0.123499238 |
| 29.075367  | 32.1175034 | 34.7168323 | 17.938857  | 33.818205  | -0.9147121 | 0.127922322 |
| 1.0560273  | 0.94336414 | 1.03444507 | 1.41118214 | 0.9998946  | 0.49705627 | 0.130491339 |
| 0.5465169  | 0.47507021 | 0.56642606 | 0.44615182 | 0.52927601 | -0.2464856 | 0.130491339 |
| 0.32162605 | 0.35658963 | 0.38422809 | 0.41745874 | 0.36095965 | 0.20979604 | 0.131265017 |
| 0.59152437 | 0.54031712 | 0.61801403 | 0.69583354 | 0.57076074 | 0.28585613 | 0.131265017 |
| 0.99047348 | 0.99432634 | 0.92326026 | 1.59765054 | 1.08135024 | 0.56311801 | 0.131265017 |
| 0.51005117 | 0.43525761 | 0.51258903 | 0.40857913 | 0.47802468 | -0.2264696 | 0.13447802  |
| 1.71051379 | 1.54522742 | 1.53847194 | 2.59989144 | 1.64353332 | 0.66165068 | 0.134487189 |
| 0.87770202 | 1.17280387 | 1.0264626  | 0.90244073 | 1.29496883 | -0.5210133 | 0.134720008 |
| 0.73205871 | 0.68265569 | 0.73115667 | 0.97417034 | 0.74524178 | 0.38646551 | 0.13575373  |
| 3.55811472 | 4.64988108 | 5.5401466  | 2.62379477 | 4.39857522 | -0.7453814 | 0.136959361 |
| 0.71700883 | 1.20077761 | 1.01558395 | 0.7796838  | 0.99968688 | -0.3585871 | 0.138799168 |
| 0.85812429 | 0.79925575 | 1.41400349 | 0.78709649 | 1.04182194 | -0.4044963 | 0.138799168 |
| 1.61228887 | 1.69498919 | 1.74460545 | 1.14966921 | 1.56039483 | -0.4406923 | 0.139754954 |
| 2.97960538 | 2.82774933 | 3.30732245 | 1.98366291 | 3.08228069 | -0.6358314 | 0.143797493 |
| 1.98616503 | 2.3748474  | 2.16748624 | 1.46066033 | 2.23308364 | -0.6124166 | 0.147368222 |
| 0.49745605 | 0.60721604 | 0.53077705 | 0.62420884 | 0.52052265 | 0.26206787 | 0.147944346 |
| 2.94122202 | 0.96492296 | 1.87246753 | 4.23389667 | 2.09464444 | 1.01528069 | 0.149094191 |
| 7.10759703 | 2.98603472 | 1.82040681 | 1.93880691 | 3.51342328 | -0.8577083 | 0.150137416 |
| 7.88821613 | 5.94476863 | 3.29515108 | 2.77019771 | 4.92686855 | -0.830682  | 0.151533954 |
| 1.51576759 | 1.08209787 | 0.96772645 | 0.83774233 | 1.17106244 | -0.4832395 | 0.152761963 |
| 0.85440515 | 0.73374439 | 0.87685441 | 0.67946563 | 0.81203406 | -0.2571397 | 0.152979333 |

|            |            |            |            |            |            |             |
|------------|------------|------------|------------|------------|------------|-------------|
| 7.18824628 | 25.2094125 | 3.85124231 | 1.93793355 | 14.3265643 | -2.8861017 | 0.154508521 |
| 2.09922909 | 2.28806567 | 2.50739899 | 1.53688361 | 2.31210366 | -0.5891982 | 0.154508521 |
| 2.42362206 | 2.16564314 | 2.41816433 | 1.58691865 | 2.41754587 | -0.6073151 | 0.159930178 |
| 0.58458131 | 0.78744527 | 0.92244935 | 0.63695646 | 0.77259298 | -0.2785138 | 0.170493946 |
| 1.14492964 | 1.01649209 | 1.05943937 | 1.53954725 | 1.10125725 | 0.48335462 | 0.171901528 |
| 9.34432919 | 4.74249377 | 3.46036838 | 2.86207968 | 6.06995629 | -1.0846223 | 0.171901528 |
| 5.56292601 | 32.117501  | 34.7168323 | 13.1245071 | 27.9400941 | -1.0900736 | 0.173844385 |
| 0.2252814  | 0.20868122 | 0.22809135 | 0.24977469 | 0.22051912 | 0.1797236  | 0.1806042   |
| 0.75840065 | 0.67472008 | 0.52056132 | 5.74989959 | 0.69220615 | 3.0542631  | 0.1806042   |
| 1.23175041 | 1.2097648  | 1.16302751 | 0.93686656 | 1.20541715 | -0.363617  | 0.1806042   |
| 2.61347225 | 2.06069651 | 4.57096262 | 11.5444095 | 3.27223178 | 1.81884753 | 0.181087791 |
| 0.32759571 | 0.30122059 | 0.31113356 | 0.35320842 | 0.30963862 | 0.18993429 | 0.181926144 |
| 29.075367  | 4.54201391 | 5.73592011 | 6.51663238 | 19.6791045 | -1.5944661 | 0.181926144 |
| 6.20834295 | 5.93884854 | 7.12289427 | 3.43709043 | 6.72108798 | -0.967507  | 0.181926144 |
| 0.35452851 | 0.41103791 | 0.39884593 | 0.45074663 | 0.39227782 | 0.20044096 | 0.182882585 |
| 0.92459156 | 0.82254622 | 0.99917867 | 1.14123121 | 0.89589064 | 0.34919656 | 0.18327142  |
| 1.87561206 | 1.1129959  | 1.32455676 | 2.97762516 | 1.17864574 | 1.33703199 | 0.185536255 |
| 7.83886507 | 8.39931205 | 6.30996346 | 2.65827414 | 7.9265654  | -1.576206  | 0.187548974 |
| 6.04114384 | 4.3345563  | 5.94765724 | 3.17259993 | 5.05428118 | -0.6718403 | 0.187548974 |
| 7.95059955 | 5.46596736 | 5.65058282 | 3.39792926 | 6.77144754 | -0.9948085 | 0.187548974 |
| 0.89026452 | 1.06391719 | 1.29740775 | 0.87182739 | 1.19881359 | -0.4594929 | 0.18854876  |
| 0.76895479 | 0.67339451 | 0.80241372 | 0.62046084 | 0.73975181 | -0.2537012 | 0.189535365 |
| 29.075367  | 32.1175034 | 34.7168323 | 20.6458609 | 33.818205  | -0.7119475 | 0.19141221  |
| 1.0871716  | 1.89393176 | 0.75010916 | 0.86169426 | 1.19085189 | -0.466746  | 0.191561416 |
| 0.42480594 | 0.45719873 | 0.37208085 | 0.35943366 | 0.4112034  | -0.1941267 | 0.193610411 |
| 1.05890419 | 1.13259251 | 0.69060991 | 0.68560242 | 0.86688393 | -0.3384667 | 0.193610411 |
| 0.62922783 | 32.1175034 | 0.6505075  | 0.33261182 | 8.51188096 | -4.6775666 | 0.194699891 |
| 1.43225594 | 3.57144092 | 1.6669654  | 1.35330777 | 2.13217003 | -0.6558325 | 0.194699891 |
| 0.03974476 | 0.03926244 | 0.05880984 | 0.0624872  | 0.04753509 | 0.39456798 | 0.194817302 |
| 0.36080116 | 0.33747222 | 0.46677719 | 0.34753179 | 0.41135904 | -0.2432532 | 0.203302034 |
| 0.86073312 | 0.59507927 | 0.66701688 | 0.89170225 | 0.70309188 | 0.34284883 | 0.205585142 |
| 1.85589714 | 3.73728541 | 4.5472228  | 2.92612737 | 5.02698408 | -0.7807006 | 0.205585142 |
| 0.49822458 | 0.35025401 | 0.45736024 | 0.51105657 | 0.4273831  | 0.25795314 | 0.206492743 |
| 0.3307782  | 0.3025705  | 0.31289559 | 0.29401391 | 0.33045842 | -0.1685843 | 0.206492743 |
| 1.2351018  | 0.97517256 | 0.9752579  | 0.84223485 | 1.05503727 | -0.3249995 | 0.206492743 |
| 0.76723237 | 0.44650994 | 0.38797225 | 8.4384441  | 0.50529717 | 4.061773   | 0.206492743 |
| 1.88958011 | 1.80331964 | 2.15415277 | 1.37859248 | 1.93892281 | -0.4920593 | 0.207451046 |
| 29.075367  | 4.36477397 | 3.61758169 | 0.98739756 | 10.0493049 | -3.3473208 | 0.211521251 |
| 0.89129269 | 1.25522026 | 3.64398311 | 9.99989894 | 1.86207263 | 2.42500417 | 0.213345557 |
| 1.9789799  | 0.43834929 | 0.9503193  | 6.33317018 | 0.98017446 | 2.69181739 | 0.215365782 |
| 0.25580846 | 0.31708565 | 0.24291307 | 0.22669858 | 0.26214158 | -0.2095708 | 0.221111163 |
| 0.93433498 | 0.79598741 | 0.98198076 | 1.10612387 | 0.89585367 | 0.30417795 | 0.223759626 |

|            |            |            |            |            |            |             |
|------------|------------|------------|------------|------------|------------|-------------|
| 0.73878792 | 32.1175034 | 0.47461775 | 0.98974867 | 8.47225933 | -3.0976126 | 0.223759626 |
| 1.95294803 | 32.1175034 | 2.08829837 | 0.90790842 | 9.89535389 | -3.4461326 | 0.224706459 |
| 1.36440433 | 2.01755834 | 13.8210363 | 2.8412543  | 5.6812058  | -0.9996692 | 0.224706459 |
| 6.88483569 | 1.0107145  | 1.2485171  | 1.21853648 | 2.46393147 | -1.0158127 | 0.22631674  |
| 0.48157376 | 0.49766389 | 0.48545997 | 0.609393   | 0.50942984 | 0.25848948 | 0.233180768 |
| 0.30648994 | 0.14365643 | 0.27187476 | 6.7521311  | 0.18148936 | 5.21738605 | 0.233524403 |
| 0.58038281 | 0.45591749 | 0.59359622 | 0.45948272 | 0.54275135 | -0.2402808 | 0.233524403 |
| 0.01395143 | 0.00321175 | 0.05924129 | 0.01200925 | 0.02685621 | -1.161109  | 0.234120981 |
| 0.33503171 | 0.19198695 | 0.18621762 | 6.63980554 | 0.26346325 | 4.65546737 | 0.240107846 |
| 1.06327232 | 0.97481266 | 0.86114067 | 0.79533368 | 0.9561893  | -0.265736  | 0.243230867 |
| 1.15561472 | 1.35032613 | 0.73145522 | 0.84357527 | 1.06159491 | -0.3316447 | 0.243230867 |
| 3.80708553 | 4.09342203 | 6.00566673 | 3.27256715 | 5.1674853  | -0.6590396 | 0.24555078  |
| 0.86755841 | 0.84529906 | 0.78758142 | 1.02064439 | 0.84016978 | 0.28072749 | 0.249267914 |
| 0.22366981 | 0.19648869 | 0.21514479 | 0.18237933 | 0.20456795 | -0.1656379 | 0.250426548 |
| 2.2016087  | 3.84506406 | 1.10010081 | 1.37951826 | 2.11188932 | -0.6143697 | 0.250426548 |
| 0.63207866 | 0.48580731 | 0.57900458 | 0.48137932 | 0.55915644 | -0.2160778 | 0.250702261 |
| 29.075367  | 32.1175034 | 34.7168323 | 11.675837  | 24.4729356 | -1.0676612 | 0.250702261 |
| 0.48443159 | 32.1175034 | 0.5370195  | 0.8964824  | 8.71671969 | -3.2814382 | 0.253268907 |
| 1.7459883  | 2.48128907 | 34.7168323 | 1.0879968  | 10.4151998 | -3.2589443 | 0.257693999 |
| 2.08470855 | 1.49620637 | 1.44463138 | 2.37305908 | 1.5343683  | 0.6291032  | 0.257830163 |
| 0.55935042 | 0.59530379 | 0.67352308 | 0.52492907 | 0.61105768 | -0.2191861 | 0.258027026 |
| 1.78194237 | 2.10617738 | 0.21859253 | 1.94181199 | 1.12949339 | 0.7817277  | 0.25878281  |
| 1.19181162 | 1.74701226 | 1.12850464 | 1.13735183 | 1.44706933 | -0.3474554 | 0.25878281  |
| 0.84747054 | 0.93179869 | 0.72265994 | 0.9655149  | 0.81491402 | 0.24465068 | 0.260065483 |
| 0.38967041 | 0.43561502 | 0.48268572 | 0.38945699 | 0.44155709 | -0.181136  | 0.260065483 |
| 0.94998422 | 1.48669739 | 1.38693865 | 2.72465325 | 1.33773501 | 1.02628028 | 0.267952478 |
| 1.96075594 | 0.5917656  | 0.59619826 | 1.30171905 | 0.92935972 | 0.48610908 | 0.268889661 |
| 4.18995471 | 3.95613846 | 5.11088363 | 3.11429625 | 4.50038284 | -0.5311415 | 0.268907424 |
| 0.30332713 | 0.39824227 | 0.36950472 | 0.41898883 | 0.37271512 | 0.16883845 | 0.271095757 |
| 10.36903   | 19.4330413 | 5.00142047 | 3.88416029 | 12.8565293 | -1.7268266 | 0.271095757 |
| 2.36207216 | 2.14946472 | 3.01002289 | 3.78766669 | 2.4963502  | 0.60148904 | 0.276557226 |
| 0.90513861 | 1.9706662  | 2.42036787 | 1.26231388 | 11.1648225 | -3.1448177 | 0.276557226 |
| 1.75302841 | 1.78247219 | 0.82878244 | 8.17458945 | 1.21946095 | 2.74490272 | 0.284808482 |
| 6.96947839 | 5.23794073 | 34.7168323 | 4.96314439 | 14.6917658 | -1.5656815 | 0.284808482 |
| 2.99769596 | 3.78529032 | 34.7168323 | 2.06972814 | 11.1522685 | -2.429824  | 0.290703369 |
| 0.71868148 | 0.81172324 | 0.68015418 | 0.62057733 | 0.71770597 | -0.2097819 | 0.294487121 |
| 0.98973625 | 0.84262448 | 0.8854061  | 1.18561637 | 0.95223525 | 0.31624734 | 0.295591284 |
| 0.26699907 | 0.29586869 | 0.33743857 | 0.29445202 | 0.33272222 | -0.1762856 | 0.298476066 |
| 1.09529984 | 32.1175034 | 6.70082977 | 8.15985085 | 19.8191875 | -1.2802831 | 0.302585612 |
| 1.15323257 | 2.777978   | 1.99471738 | 6.49478972 | 1.79870807 | 1.85232176 | 0.30295778  |
| 0.13132956 | 0.18835637 | 0.19773203 | 0.15000984 | 0.17201708 | -0.1974947 | 0.305752325 |
| 3.97861416 | 1.07726145 | 1.43359117 | 1.23594256 | 1.84146177 | -0.5752397 | 0.309359088 |

|            |            |            |            |            |            |             |
|------------|------------|------------|------------|------------|------------|-------------|
| 5.70859289 | 3.46259054 | 2.53470676 | 2.43077124 | 3.577667   | -0.557605  | 0.310945058 |
| 0.3845377  | 0.44485062 | 0.42022487 | 0.48946415 | 0.42878721 | 0.19094135 | 0.314787744 |
| 0.96844109 | 1.48413017 | 0.99344393 | 1.44344384 | 1.12385162 | 0.36106341 | 0.319906769 |
| 0.87060534 | 0.89885996 | 1.13506833 | 1.23277883 | 0.99452747 | 0.30983086 | 0.324007056 |
| 2.25696796 | 1.4973585  | 0.57879811 | 2.10803945 | 10.9240604 | -2.3735354 | 0.324007056 |
| 0.60550338 | 0.35833246 | 0.40445121 | 0.40870337 | 0.46302862 | -0.1800472 | 0.332162093 |
| 1.70317768 | 1.54838487 | 2.02553978 | 2.37333734 | 1.73411423 | 0.45271824 | 0.333215595 |
| 0.54968765 | 0.63044107 | 0.67671578 | 0.53585198 | 0.6090857  | -0.1848107 | 0.333215595 |
| 0.54094318 | 0.48511435 | 0.49700997 | 0.44547827 | 0.49493782 | -0.1518922 | 0.333215595 |
| 1.60626778 | 1.26613728 | 1.45107364 | 1.16031613 | 1.40778996 | -0.2789142 | 0.338862509 |
| 0.22584095 | 0.27802465 | 0.18243464 | 0.26218717 | 0.23576943 | 0.15322045 | 0.347596737 |
| 0.84613875 | 0.81992279 | 0.82466076 | 0.75878677 | 0.85705438 | -0.1756922 | 0.3591043   |
| 0.64157176 | 1.09543072 | 0.72780666 | 0.72983247 | 0.83720229 | -0.1980109 | 0.361774033 |
| 0.95873746 | 1.31884882 | 1.24844509 | 1.04400713 | 1.26172513 | -0.2732661 | 0.365633689 |
| 1.62849753 | 2.46372098 | 1.56052836 | 7.22512623 | 1.70629502 | 2.08215568 | 0.367330468 |
| 1.85189038 | 1.59354889 | 1.77222874 | 1.38432898 | 1.76581113 | -0.3511442 | 0.376661248 |
| 0.94574454 | 1.0749519  | 0.9727597  | 1.24387042 | 1.02057717 | 0.28545093 | 0.376830575 |
| 2.57107603 | 0.59688171 | 0.44393601 | 1.80320042 | 1.2897584  | 0.48345892 | 0.378051132 |
| 1.61423929 | 1.58373837 | 2.75306328 | 1.37520875 | 1.96357238 | -0.5138302 | 0.378051132 |
| 0.53161315 | 0.49347199 | 0.54429341 | 0.56931324 | 0.50469902 | 0.17379935 | 0.378972233 |
| 0.7083028  | 32.1175034 | 34.7168323 | 16.4673237 | 26.7264389 | -0.6986615 | 0.378972233 |
| 7.66228987 | 32.1175034 | 7.62684748 | 11.6238757 | 21.6924395 | -0.9001011 | 0.378972233 |
| 5.61804182 | 18.0095742 | 14.5737738 | 4.07453219 | 10.5590489 | -1.3737736 | 0.383302439 |
| 1.399319   | 1.27681906 | 1.62523058 | 1.70131708 | 1.38744984 | 0.29421643 | 0.387707912 |
| 0.29877564 | 0.39229774 | 0.34789588 | 0.40617342 | 0.35369115 | 0.19960572 | 0.389930191 |
| 0.32258726 | 0.32253243 | 0.32554411 | 0.35438561 | 0.32509071 | 0.12447769 | 0.394585469 |
| 3.28781549 | 1.82755228 | 1.37173148 | 1.44923855 | 1.9573895  | -0.4336358 | 0.406454578 |
| 5.9396173  | 4.93582498 | 5.1540787  | 4.0204108  | 5.53880235 | -0.4622311 | 0.406454578 |
| 7.24620757 | 6.21708878 | 5.283309   | 4.40780724 | 6.68263023 | -0.6003549 | 0.406895584 |
| 2.7721482  | 1.79393747 | 3.01423827 | 7.38074146 | 2.56088158 | 1.52712521 | 0.407280688 |
| 3.03861564 | 32.1175034 | 2.04023021 | 3.68864677 | 10.3246495 | -1.4849293 | 0.416316206 |
| 4.35003233 | 2.22184286 | 5.36045126 | 3.21557062 | 4.34637053 | -0.4347364 | 0.419551543 |
| 1.36355265 | 1.29227806 | 1.66875839 | 1.83624579 | 1.40589458 | 0.38527076 | 0.422434708 |
| 0.95148391 | 0.80895577 | 0.89497579 | 0.99603841 | 0.86997451 | 0.19522825 | 0.425062391 |
| 0.3566845  | 0.26223898 | 0.73985172 | 0.50883558 | 0.43621217 | 0.22216954 | 0.426059873 |
| 2.76373678 | 32.1175034 | 3.7094162  | 3.87229554 | 10.2056963 | -1.3981136 | 0.431856006 |
| 2.03872164 | 2.71847656 | 2.98492296 | 2.04225119 | 2.61815726 | -0.3583914 | 0.431856006 |
| 4.24041907 | 3.55434714 | 2.89995881 | 6.15091306 | 3.53566081 | 0.79882071 | 0.432660414 |
| 0.63043422 | 0.58817171 | 0.6224519  | 0.56122727 | 0.6218119  | -0.1478931 | 0.436834436 |
| 1.35796191 | 1.27866242 | 1.36259675 | 1.10712694 | 1.28442526 | -0.2143023 | 0.436834436 |
| 0.38878362 | 0.34124135 | 0.4490339  | 0.37052453 | 0.40365457 | -0.1235522 | 0.437077697 |
| 0.86589096 | 0.72792331 | 0.95295292 | 0.78496057 | 0.88050838 | -0.1657166 | 0.438805612 |

|            |            |            |            |            |            |             |
|------------|------------|------------|------------|------------|------------|-------------|
| 0.4958164  | 0.50459185 | 0.5031209  | 0.55422863 | 0.48986    | 0.17811175 | 0.446322751 |
| 0.83958555 | 0.88884109 | 0.9287     | 0.98874487 | 0.86892089 | 0.18637346 | 0.448848414 |
| 0.29113261 | 0.25592297 | 0.38512794 | 0.34331416 | 0.31100329 | 0.14259951 | 0.451097795 |
| 0.67611501 | 0.61730735 | 0.68129241 | 0.71944175 | 0.65647983 | 0.13212719 | 0.452478378 |
| 7.05795094 | 5.23458188 | 5.75534754 | 4.2007501  | 5.93266437 | -0.4980332 | 0.457166075 |
| 1.2147002  | 0.95507668 | 1.28827244 | 0.98619346 | 1.14785459 | -0.2189973 | 0.457963472 |
| 4.04274419 | 3.88327637 | 4.93267984 | 3.13955228 | 4.04667338 | -0.3661776 | 0.457963472 |
| 3.96790599 | 5.8627394  | 4.7545012  | 3.7062837  | 4.81504596 | -0.3775763 | 0.468700083 |
| 0.8501629  | 2.47347116 | 2.10180186 | 1.35072741 | 1.72250129 | -0.3507685 | 0.496704115 |
| 0.55673282 | 0.48798787 | 0.56777238 | 0.59668386 | 0.54141686 | 0.14022694 | 0.500843021 |
| 2.17423921 | 1.48739468 | 5.91705964 | 6.17134913 | 3.7395054  | 0.72273845 | 0.500843021 |
| 2.86459367 | 1.35737493 | 1.0369239  | 1.37830586 | 1.70776718 | -0.3092152 | 0.50495813  |
| 0.35419358 | 0.32166296 | 0.32290077 | 0.36071319 | 0.33756504 | 0.09568667 | 0.506628818 |
| 0.86067149 | 0.93708912 | 0.80008337 | 0.99222914 | 0.88243139 | 0.16918922 | 0.508708922 |
| 12.2673583 | 8.10974987 | 9.49593247 | 5.52859229 | 10.1504619 | -0.8765613 | 0.51128092  |
| 1.89558831 | 1.78323318 | 2.03164219 | 1.5058488  | 1.80368771 | -0.2603727 | 0.513420672 |
| 22.1883413 | 12.0813107 | 7.44543049 | 6.5408862  | 12.7678766 | -0.9649606 | 0.513420672 |
| 1.04266497 | 2.84097551 | 1.3355983  | 1.42256784 | 1.73232983 | -0.2842162 | 0.522384366 |
| 5.68544797 | 6.36595679 | 5.89178788 | 4.33870714 | 5.80298067 | -0.4195289 | 0.5244813   |
| 0.90144698 | 1.74415421 | 2.85694848 | 2.92154619 | 2.30930859 | 0.33927113 | 0.537780452 |
| 1.46165986 | 1.11510575 | 1.44235368 | 1.16497641 | 1.31979597 | -0.1800142 | 0.539880043 |
| 0.9977133  | 1.14591434 | 0.96124686 | 0.88664784 | 1.00701597 | -0.1836534 | 0.540782326 |
| 29.075367  | 32.1175034 | 4.25096781 | 13.1301383 | 20.0735221 | -0.6124117 | 0.543291333 |
| 0.88218162 | 0.99909714 | 1.53894936 | 1.37602975 | 1.15554022 | 0.25194418 | 0.545246885 |
| 2.09919499 | 0.94483857 | 0.63803729 | 0.9467629  | 1.12247554 | -0.2456089 | 0.545246885 |
| 8.99445407 | 7.45823725 | 9.65737241 | 5.27054192 | 8.65979565 | -0.7163817 | 0.545246885 |
| 1.63243885 | 1.20104309 | 1.48412028 | 1.64598059 | 1.41440452 | 0.21875253 | 0.545489908 |
| 2.10902846 | 1.6860922  | 1.36155027 | 5.32942552 | 11.129947  | -1.0623948 | 0.545489908 |
| 0.02267777 | 0.00707422 | 0.02145632 | 0.00998838 | 0.01667361 | -0.7392444 | 0.545489908 |
| 0.52515676 | 0.71916208 | 1.08235347 | 0.87929097 | 0.72036621 | 0.28761014 | 0.554055247 |
| 0.9596064  | 0.82680994 | 0.98712004 | 1.02213168 | 0.91699945 | 0.15658829 | 0.55465064  |
| 0.81864635 | 1.11625436 | 1.77552552 | 1.63195607 | 1.38025105 | 0.24167152 | 0.55465064  |
| 8.55441608 | 10.6873865 | 6.21265941 | 5.27700126 | 8.09888903 | -0.6180057 | 0.555592831 |
| 1.25430846 | 0.85509481 | 0.62890984 | 1.07899319 | 0.95494918 | 0.1761899  | 0.556492421 |
| 0.65677076 | 0.55951076 | 0.66928908 | 0.56840465 | 0.61511353 | -0.1139344 | 0.559500353 |
| 0.8150506  | 0.89716063 | 0.96182237 | 0.95391624 | 0.8679831  | 0.13619563 | 0.559500353 |
| 2.69140162 | 1.87678682 | 2.02430632 | 1.86004546 | 2.20976496 | -0.248555  | 0.562199298 |
| 8.37386074 | 5.913497   | 12.1183747 | 5.34797079 | 8.75770795 | -0.7115618 | 0.562537021 |
| 0.43774787 | 0.45865199 | 0.44429644 | 0.49416784 | 0.45365595 | 0.12340253 | 0.564920238 |
| 0.20733601 | 0.16951715 | 0.13487563 | 0.15506215 | 0.16944989 | -0.1280121 | 0.564920238 |
| 0.25426853 | 0.23654988 | 0.26055348 | 0.26019325 | 0.24503922 | 0.08657085 | 0.570812404 |
| 0.41996708 | 0.44001899 | 0.42718772 | 0.47179725 | 0.43889473 | 0.10429207 | 0.571570134 |

|            |            |            |            |            |            |             |
|------------|------------|------------|------------|------------|------------|-------------|
| 3.65029456 | 5.51949387 | 7.69990613 | 4.24763813 | 5.43009057 | -0.3543154 | 0.58640466  |
| 0.84917868 | 0.86666002 | 0.7133931  | 0.89491465 | 0.81330546 | 0.13795279 | 0.587298146 |
| 0.37163043 | 0.40060408 | 0.30046474 | 0.3684546  | 0.34876442 | 0.07923399 | 0.60112533  |
| 0.72058455 | 0.6368483  | 0.69231707 | 0.61938256 | 0.66582354 | -0.1043091 | 0.60112533  |
| 0.01617609 | 0.05783606 | 0.02000033 | 0.03486691 | 0.0278408  | 0.32465767 | 0.604338113 |
| 0.02240336 | 0.00321175 | 0.02081899 | 0.01878079 | 0.01317505 | 0.51144888 | 0.608307274 |
| 3.15263107 | 2.68900779 | 3.10874762 | 2.59228665 | 3.08293206 | -0.2500778 | 0.609502833 |
| 1.72725039 | 0.90810897 | 1.21041544 | 1.54258215 | 1.33642422 | 0.20696929 | 0.617529751 |
| 7.15435826 | 4.85201801 | 2.02028297 | 7.06529173 | 4.18228046 | 0.75645932 | 0.617529751 |
| 0.10317266 | 0.08132454 | 0.10465425 | 0.10220979 | 0.09572569 | 0.09455537 | 0.620383971 |
| 6.69113153 | 5.9548464  | 7.494404   | 5.29980228 | 6.88907372 | -0.3783715 | 0.624165158 |
| 0.41101794 | 0.39411569 | 0.43183968 | 0.43949868 | 0.41750405 | 0.07406864 | 0.632219391 |
| 0.23020722 | 0.23331139 | 0.23703978 | 0.22258433 | 0.23317534 | -0.0670632 | 0.632219391 |
| 0.66360914 | 0.42864716 | 0.51282547 | 0.52542485 | 0.56641942 | -0.1083863 | 0.632219391 |
| 1.00727878 | 1.04647537 | 0.80836233 | 0.87839844 | 0.96172196 | -0.1307444 | 0.632219391 |
| 1.24520161 | 2.07466056 | 1.69942916 | 1.41429407 | 1.60372572 | -0.1813453 | 0.643314768 |
| 1.00725937 | 0.9713803  | 0.93240186 | 1.01625227 | 0.93388154 | 0.12194711 | 0.650235943 |
| 0.3362849  | 0.81982432 | 0.33768057 | 0.53497056 | 0.47466474 | 0.17255063 | 0.650685227 |
| 2.14771988 | 3.06214049 | 1.6684283  | 2.67050266 | 2.11966597 | 0.33327439 | 0.658599096 |
| 0.84079492 | 0.67853577 | 0.9313856  | 0.78318205 | 0.83625551 | -0.0945961 | 0.667157841 |
| 8.50741528 | 11.9517889 | 9.97060977 | 7.2151529  | 11.3853759 | -0.6580801 | 0.667157841 |
| 0.96450927 | 0.7831196  | 1.02031376 | 0.98350249 | 0.91279186 | 0.10764278 | 0.670120057 |
| 0.97342299 | 0.9830417  | 0.77864683 | 0.85391303 | 0.76806041 | 0.15286935 | 0.670120057 |
| 1.47165859 | 1.04574141 | 0.96469172 | 1.051854   | 1.1518881  | -0.1310661 | 0.670120057 |
| 1.4139316  | 1.13559422 | 1.15778303 | 1.15687794 | 1.26744553 | -0.1316871 | 0.670120057 |
| 1.05919923 | 0.79637074 | 1.05816561 | 0.89286    | 0.98206246 | -0.1373808 | 0.670120057 |
| 0.51423841 | 0.52473976 | 0.50359232 | 0.53596677 | 0.5044143  | 0.08753439 | 0.670996254 |
| 0.35584942 | 0.33080515 | 0.34239407 | 0.31950576 | 0.33443269 | -0.0658739 | 0.670996254 |
| 3.17254812 | 2.25198656 | 2.97093063 | 3.68722519 | 3.1586451  | 0.22322968 | 0.671411301 |
| 1.03996277 | 0.52735649 | 0.50523972 | 0.562586   | 0.6160523  | -0.1309792 | 0.672557469 |
| 0.48032383 | 0.24837422 | 0.35233355 | 0.36120047 | 0.34235992 | 0.07728597 | 0.675990968 |
| 0.78891739 | 1.07124793 | 0.70237441 | 0.77189959 | 0.82118236 | -0.0892894 | 0.675990968 |
| 0.76363072 | 0.62006628 | 1.33768786 | 0.8407399  | 0.9203707  | -0.1305555 | 0.675990968 |
| 0.3136699  | 0.20657503 | 0.23753349 | 0.25214645 | 0.26494478 | -0.0714298 | 0.679649511 |
| 4.14603371 | 4.32270233 | 4.99815663 | 4.71213168 | 5.67442052 | -0.2680932 | 0.683612887 |
| 6.61972195 | 9.08466062 | 11.5327149 | 6.16000405 | 8.74108702 | -0.5048814 | 0.686233734 |
| 1.21893128 | 0.97208019 | 0.89114455 | 1.10913446 | 1.01932065 | 0.12182632 | 0.688307944 |
| 0.93947015 | 0.76739036 | 0.92432189 | 0.81706229 | 0.87296894 | -0.0954842 | 0.688307944 |
| 2.79530116 | 2.85986665 | 9.21502363 | 5.70068204 | 4.54100588 | 0.32812263 | 0.688307944 |
| 10.1525963 | 1.02973398 | 2.49592439 | 8.50212094 | 13.2603422 | -0.6412233 | 0.696606648 |
| 1.54123685 | 3.12839178 | 0.93097538 | 1.43712073 | 1.63503894 | -0.1861437 | 0.69866968  |
| 1.05995164 | 32.1175034 | 0.59887004 | 12.50935   | 8.60470385 | 0.53980938 | 0.69866968  |

|            |            |            |            |            |            |             |
|------------|------------|------------|------------|------------|------------|-------------|
| 4.40398908 | 5.74435217 | 34.7168323 | 8.4196447  | 12.8612178 | -0.611196  | 0.705565178 |
| 0.42964694 | 0.39173879 | 0.44196651 | 0.4004274  | 0.41634999 | -0.0562561 | 0.707719949 |
| 0.77864435 | 0.59911365 | 0.61204505 | 0.6793957  | 0.64669704 | 0.07116207 | 0.709412394 |
| 0.78071608 | 0.56681765 | 0.88925314 | 0.77488967 | 0.73339445 | 0.07940155 | 0.709412394 |
| 0.33737241 | 1.40325016 | 0.86792321 | 0.88406385 | 0.97675513 | -0.1438464 | 0.70968758  |
| 2.33387401 | 0.80304686 | 2.61426164 | 1.61580978 | 1.82039942 | -0.1719977 | 0.710916635 |
| 1.67038673 | 1.5616616  | 1.77215094 | 1.88073248 | 1.6958636  | 0.14927452 | 0.72054209  |
| 3.52711378 | 8.40799127 | 7.48408208 | 5.87695506 | 7.37643885 | -0.3278556 | 0.72054209  |
| 7.65571213 | 6.81042163 | 8.83649952 | 6.14702533 | 7.89784183 | -0.36157   | 0.72054209  |
| 1.65368853 | 1.55175076 | 1.37233778 | 1.39500357 | 1.51905143 | -0.1229019 | 0.72581424  |
| 4.86854123 | 1.98934798 | 34.7168323 | 7.7118173  | 11.7365787 | -0.6058691 | 0.72581424  |
| 5.30334964 | 2.49293001 | 2.6701901  | 3.64001377 | 3.19496617 | 0.18814325 | 0.735336339 |
| 0.30166141 | 0.50032809 | 0.3676811  | 0.44936072 | 0.42549605 | 0.07872827 | 0.743051993 |
| 0.85009989 | 0.714488   | 0.59799105 | 0.6679812  | 0.70101864 | -0.0696453 | 0.748688326 |
| 1.14584724 | 0.8040522  | 0.95981111 | 0.89351903 | 0.94876807 | -0.086557  | 0.753553074 |
| 0.85742616 | 0.72061186 | 0.91772857 | 0.78525965 | 0.82004306 | -0.0625299 | 0.753842767 |
| 0.86003395 | 0.23292551 | 0.47592454 | 6.90414748 | 10.2330003 | -0.567694  | 0.760201935 |
| 0.34030829 | 0.28630635 | 0.28333233 | 0.32000831 | 0.30903581 | 0.05033536 | 0.761688169 |
| 0.70506876 | 13.6121248 | 34.7168323 | 17.4447538 | 13.8608073 | 0.33178195 | 0.761688169 |
| 11.3568742 | 4.17332342 | 17.1401818 | 11.7255904 | 8.90083918 | 0.39764729 | 0.761985299 |
| 10.2382106 | 10.4447029 | 11.8567073 | 8.5812217  | 11.3767772 | -0.406837  | 0.777196307 |
| 0.53719467 | 0.46077459 | 0.47373727 | 0.50594119 | 0.48519034 | 0.06041887 | 0.777345705 |
| 29.075367  | 0.79070319 | 0.48424091 | 5.75598284 | 7.7414699  | -0.4275452 | 0.777345705 |
| 1.11184331 | 0.97073639 | 1.28896532 | 1.25811679 | 1.17029308 | 0.10439597 | 0.779337807 |
| 1.8682643  | 0.4755164  | 34.7168323 | 12.4295038 | 9.42463585 | 0.39925992 | 0.783540345 |
| 1.48433256 | 2.06511238 | 1.66412932 | 2.13764999 | 1.94135198 | 0.13896394 | 0.783540345 |
| 2.52455965 | 3.59774259 | 2.82115052 | 3.29279911 | 2.97286926 | 0.14745848 | 0.790432979 |
| 1.54264975 | 1.12654783 | 1.33782137 | 1.27493508 | 1.35145475 | -0.0840894 | 0.793426241 |
| 6.95884786 | 8.23002511 | 7.35931118 | 6.41325968 | 7.73809093 | -0.2709199 | 0.793426241 |
| 0.60466453 | 0.75974306 | 1.06740182 | 1.02013846 | 1.09396382 | -0.1008    | 0.798025118 |
| 5.25544267 | 4.11693456 | 34.7168323 | 14.7440302 | 11.7127966 | 0.33204535 | 0.798025118 |
| 8.53087242 | 7.44396384 | 8.48235589 | 6.99145897 | 8.83277409 | -0.3372731 | 0.80508488  |
| 3.32015321 | 4.73925989 | 5.51885151 | 10.5031671 | 13.2353454 | -0.3335714 | 0.825089674 |
| 1.71337966 | 1.5593535  | 1.79146597 | 1.59156369 | 1.67972588 | -0.0777809 | 0.826940971 |
| 0.42557176 | 0.70081393 | 0.47066508 | 0.55975107 | 0.54132908 | 0.04827949 | 0.827102552 |
| 6.44881333 | 32.1175034 | 3.65296679 | 8.81019735 | 11.3352122 | -0.3635652 | 0.827348265 |
| 0.35620847 | 0.29396037 | 0.29536391 | 0.33456844 | 0.32610603 | 0.03696026 | 0.829940061 |
| 0.46146933 | 0.59854842 | 0.64319801 | 0.5345592  | 0.51480589 | 0.05432116 | 0.837880208 |
| 1.7281237  | 2.27039314 | 1.46113599 | 1.97388517 | 1.85091374 | 0.0928004  | 0.84402787  |
| 8.84182404 | 2.00287189 | 2.07438433 | 3.96469415 | 4.30784235 | -0.1197559 | 0.844103924 |
| 0.47357068 | 0.50413896 | 0.48262451 | 0.48574149 | 0.47416171 | 0.03480955 | 0.852602025 |
| 0.79653633 | 0.77631545 | 0.82015667 | 0.77481799 | 0.79485499 | -0.0368342 | 0.852602025 |

|            |            |            |            |            |            |             |
|------------|------------|------------|------------|------------|------------|-------------|
| 0.35114002 | 0.27421185 | 34.7168323 | 7.18404077 | 9.01756797 | -0.3279429 | 0.852823018 |
| 1.92723615 | 1.73329967 | 2.15734426 | 1.84090813 | 1.93887334 | -0.0748009 | 0.856330613 |
| 1.09577656 | 0.74178375 | 1.08188317 | 0.90426876 | 0.87179481 | 0.05276301 | 0.858274584 |
| 1.01345286 | 0.9570451  | 1.08137569 | 0.97620896 | 1.01205608 | -0.0520273 | 0.865486979 |
| 14.9794539 | 2.09605444 | 1.03081124 | 12.3462873 | 14.3673592 | -0.2187176 | 0.874191927 |
| 0.51278769 | 0.41129616 | 0.38719524 | 0.44327714 | 0.43487047 | 0.02762321 | 0.874665729 |
| 2.97782827 | 3.16072994 | 3.86788267 | 3.55702696 | 3.37072249 | 0.07761406 | 0.874665729 |
| 1.51085425 | 32.1175034 | 1.62340001 | 10.8789632 | 9.23579428 | 0.23623313 | 0.875163454 |
| 1.23343588 | 1.78495518 | 1.35298948 | 1.47751769 | 1.41653014 | 0.0608141  | 0.876320716 |
| 2.33391948 | 2.90670733 | 2.41049622 | 3.10094555 | 2.92976655 | 0.08192248 | 0.88282442  |
| 12.0921401 | 2.9237129  | 10.8197229 | 6.80077797 | 7.58449807 | -0.1573539 | 0.89750282  |
| 1.18484167 | 1.11067264 | 1.46857995 | 1.30087777 | 1.26108011 | 0.04482549 | 0.899725827 |
| 29.075367  | 6.41061235 | 9.31463666 | 14.2829679 | 15.5852797 | -0.1258883 | 0.910682722 |
| 6.33586711 | 4.42904108 | 8.12024965 | 5.77166963 | 5.40120766 | 0.0957067  | 0.911885375 |
| 5.59654341 | 7.21199763 | 6.09504923 | 6.89790139 | 7.51390313 | -0.123405  | 0.912822108 |
| 0.30376978 | 0.32146839 | 0.31417062 | 0.30677466 | 0.30987481 | -0.0145061 | 0.924297776 |
| 0.37860496 | 0.33848664 | 0.35592773 | 0.35555435 | 0.35094081 | 0.01884235 | 0.924297776 |
| 4.88042175 | 6.51282713 | 8.04485419 | 8.22579377 | 7.48486627 | 0.13617836 | 0.924297776 |
| 4.35581786 | 2.66154924 | 6.58275209 | 4.18977553 | 4.3483324  | -0.0535893 | 0.927599405 |
| 0.86860786 | 0.70414567 | 0.89530588 | 0.82872638 | 0.83981382 | -0.0191737 | 0.942391733 |
| 0.63087074 | 0.80272823 | 0.63428191 | 0.62556221 | 0.63254502 | -0.0160148 | 0.945013691 |
| 0.84605757 | 0.73282711 | 0.87269117 | 0.80628192 | 0.81486568 | -0.0152779 | 0.947111548 |
| 0.37189974 | 0.52043266 | 0.51445747 | 0.4351731  | 0.43037818 | 0.01598447 | 0.947756389 |
| 1.63530167 | 1.28262268 | 1.57019473 | 1.45476556 | 1.47881527 | -0.0236552 | 0.94881398  |
| 0.33734121 | 0.38242539 | 0.40046763 | 0.3801658  | 0.38251444 | -0.0088855 | 0.955155715 |
| 1.96206362 | 1.07254946 | 1.46967005 | 1.52396084 | 1.50107061 | 0.02183399 | 0.955155715 |
| 0.33387349 | 0.27143874 | 0.34602773 | 0.30919329 | 0.30726428 | 0.00902896 | 0.955690357 |
| 29.075367  | 0.12759965 | 1.03471697 | 7.28220697 | 7.66639752 | -0.0741731 | 0.967608732 |
| 1.37664366 | 1.02281926 | 1.2376978  | 1.17203007 | 1.16124481 | 0.01333744 | 0.967775449 |
| 2.11215831 | 0.53430207 | 3.26783918 | 2.13452194 | 2.17456839 | -0.0268161 | 0.968958127 |
| 0.62854502 | 0.45363007 | 0.46519878 | 0.49483376 | 0.49104582 | 0.01108628 | 0.974102443 |
| 0.591398   | 0.64456934 | 0.57654553 | 0.59801814 | 0.59612913 | 0.00456439 | 0.98483434  |
| 0.21251286 | 0.15325292 | 0.1736117  | 0.18047786 | 0.18086529 | -0.0030937 | 0.989800232 |
| 1.15468735 | 1.51439256 | 1.08013636 | 1.23761864 | 1.234629   | 0.00348924 | 0.994118711 |
| 7.61221953 | 6.07777049 | 10.5621907 | 7.58989378 | 7.66024228 | -0.0133103 | 0.994118711 |
| 0.46232687 | 0.46664916 | 0.40689309 | 0.4870208  | 0.48652196 | 0.00147846 | 0.995229644 |
| 0.61362248 | 0.52133298 | 0.62195755 | 0.6474397  | 0.64754106 | -0.0002258 | 0.998991833 |
| 9.14289656 | 6.4783063  | 11.6165961 | 8.55804784 | 8.56867936 | -0.0017911 | 0.998991833 |
