# Supplementary material
Source: PubMed Central journal article supplement (PMC6543812)
Supplement: NIHMS1026625-supplement-Supp_TableS5.pdf [file NIHMS1026625-supplement-Supp_TableS5.pdf]

| UniProt Acce | Protein Name                                    | SWATH Log2 P42/P7 | SWATH BH | SILAC Log2 P42/P7 |
|--------------|-------------------------------------------------|-------------------|----------|-------------------|
| Q03265       | ATP synthase subunit alpl                       | 1.89              | 0.000    | 0.73              |
| Q91VD9       | NADH-ubiquinone oxidoreductase                  | 1.46              | 0.004    | 0.75              |
| P70404       | Isocitrate dehydrogenase                        | 3.09              | 0.005    | 1.19              |
| Q9CQ54       | NADH dehydrogenase [ubiquinone]                 | 2.51              | 0.006    | 0.84              |
| Q99KI0       | Aconitate hydratase, mitochondrial              | 1.36              | 0.010    | 0.98              |
| Q9CRB8       | Mitochondrial fission protein 1                 | 2.13              | 0.011    | 1.14              |
| P30275       | Creatine kinase U-type, mitochondrial           | 1.44              | 0.011    | 2.14              |
| P08249       | Malate dehydrogenase, mitochondrial             | 0.95              | 0.013    | 0.80              |
| Q8BMF4       | Dihydrolipoyllysine-residue succinyltransferase | 1.58              | 0.013    | 1.26              |
| Q9WTQ8       | Mitochondrial import inner membrane             | -1.57             | 0.024    | -0.79             |
| Q9D172       | ES1 protein homolog, mitochondrial              | 2.25              | 0.027    | 1.28              |
| Q91WS0       | CDGSH iron-sulfur domain protein                | 1.31              | 0.027    | 0.86              |
| O08749       | Dihydrolipoyl dehydrogenase                     | 1.35              | 0.029    | 0.79              |
| Q9CQC7       | NADH dehydrogenase [ubiquinone]                 | 1.37              | 0.029    | 0.85              |
| Q9JLZ3       | Methylglutaconyl-CoA hydratase                  | 1.75              | 0.029    | 1.11              |
| Q9D1G1       | Ras-related protein Rab-1                       | 1.95              | 0.029    | 1.40              |
| P09671       | Superoxide dismutase [Mn]                       | 1.01              | 0.029    | 1.44              |
| A2ASZ8       | Calcium-binding mitochondrial protein           | 3.72              | 0.029    | 0.38              |
| Q9CZU6       | Citrate synthase, mitochondrial                 | -0.59             | 0.029    | 0.42              |
| P17710       | Hexokinase-1 OS=Mus musculus                    | 1.23              | 0.031    | 1.51              |
| Q99N89       | 39S ribosomal protein L42                       | -1.41             | 0.034    | -0.75             |
| Q9Z0V7       | Mitochondrial import inner membrane             | -1.80             | 0.034    | -0.90             |
| D3Z7P3       | Glutaminase kidney isoform                      | 1.18              | 0.034    | 1.13              |
| P97450       | ATP synthase-coupling factor                    | 1.39              | 0.035    | 0.74              |
| Q9CQ69       | Cytochrome b-c1 complex                         | 1.53              | 0.036    | 0.81              |
| P52480       | Pyruvate kinase PKM OS=Mus musculus             | 1.51              | 0.036    | 1.94              |
| P50516       | V-type proton ATPase catalytic                  | 1.95              | 0.036    | 3.97              |
| Q8QZT1       | Acetyl-CoA acetyltransferase                    | -0.86             | 0.036    | -0.34             |
| Q9WUR9       | Adenylate kinase 4, mitochondrial               | 1.72              | 0.036    | 2.44              |
| O08599       | Syntaxin-binding protein 1                      | 1.56              | 0.040    | 3.11              |
| Q8K1Z0       | Ubiquinone biosynthesis protein                 | 1.63              | 0.041    | 1.29              |
| P55096       | ATP-binding cassette subfamily                  | -2.25             | 0.042    | -1.94             |
| Q8K009       | Mitochondrial 10-formyltetrahydrofolate         | -1.99             | 0.042    | -1.23             |
| Q9D6U8       | Protein FAM162A OS=Mus musculus                 | 1.93              | 0.042    | 0.79              |
| Q9CYH2       | Redox-regulatory protein                        | 1.36              | 0.044    | 0.75              |
| Q9CQ40       | 39S ribosomal protein L42                       | -1.47             | 0.045    | -1.09             |
| Q9JHS4       | ATP-dependent Clp protease                      | -1.30             | 0.045    | -0.71             |
| Q791T5       | Mitochondrial carrier homolog                   | -2.05             | 0.045    | -0.52             |
| Q61425       | Hydroxyacyl-coenzyme A                          | 2.61              | 0.045    | 0.33              |
| Q9D6R2       | Isocitrate dehydrogenase                        | 0.65              | 0.049    | 1.00              |
| Q9DCW4       | Electron transfer flavoprotein                  | 5.48              | 0.005    | 0.35              |

|        |                              |       |       |       |
|--------|------------------------------|-------|-------|-------|
| Q9CPQ3 | Mitochondrial import rec     | -1.67 | 0.006 | -0.11 |
| P99027 | 60S acidic ribosomal prot    | -2.03 | 0.011 | -0.42 |
| Q99LC5 | Electron transfer flavopro   | 3.65  | 0.013 | 0.30  |
| Q8BH04 | Phosphoenolpyruvate car      | 2.36  | 0.013 | 0.66  |
| Q8BP92 | Reticulocalbin-2 OS=Mus      | -1.74 | 0.019 | -1.48 |
| O35658 | Complement component         | -2.01 | 0.020 | 0.14  |
| Q9CY16 | 28S ribosomal protein S2     | -1.65 | 0.029 | -0.51 |
| Q9CZR8 | Elongation factor Ts, mito   | 2.21  | 0.029 | 0.19  |
| P24369 | Peptidyl-prolyl cis-trans is | -2.10 | 0.029 | -0.38 |
| Q80Y14 | Glutaredoxin-related prot    | -1.28 | 0.029 | -0.18 |
| Q8BLN5 | Lanosterol synthase OS=N     | -2.79 | 0.030 | 0.06  |
| P14131 | 40S ribosomal protein S1     | -2.06 | 0.032 | -0.83 |
| Q8CD10 | Calcium uptake protein 2,    | -1.82 | 0.036 | -4.30 |
| Q99KK9 | Probable histidine--tRNA     | -1.20 | 0.036 | 0.03  |
| P63017 | Heat shock cognate 71 kD     | 2.16  | 0.044 | 0.72  |
| P58064 | 28S ribosomal protein S6,    | -2.73 | 0.047 | -3.14 |
| Q9Z110 | Delta-1-pyrroline-5-carbo    | -1.33 | 0.047 | -0.61 |
| Q6PCP5 | Mitochondrial fission fact   | 2.49  | 0.047 | -0.07 |
| Q8BX10 | Serine/threonine-protein     | -1.22 | 0.050 | -0.62 |
| Q8BWT1 | 3-ketoacyl-CoA thiolase, r   | -1.27 | 0.050 | -0.29 |
| Q62425 | Cytochrome c oxidase sub     | 1.03  | 0.050 | 0.76  |
| Q7TMF3 | NADH dehydrogenase [uk       | 1.54  | 0.050 | 0.84  |
| P05202 | Aspartate aminotransfera     | 1.28  | 0.050 | 1.18  |
| Q9D1I6 | 39S ribosomal protein L1     | -1.52 | 0.051 | -0.92 |
| Q9D855 | Cytochrome b-c1 comple       | 2.23  | 0.052 | 0.67  |
| Q91YT0 | NADH dehydrogenase [uk       | 1.05  | 0.052 | 0.69  |
| Q9CR62 | Mitochondrial 2-oxogluta     | 0.90  | 0.052 | 0.85  |
| P08228 | Superoxide dismutase [Cu     | 2.83  | 0.052 | 1.02  |
| Q9DC71 | 28S ribosomal protein S1     | 3.84  | 0.055 | -0.66 |
| Q6P3A8 | 2-oxoisovalerate dehydro     | -1.97 | 0.055 | -0.48 |
| P16858 | Glyceraldehyde-3-phosph      | 2.80  | 0.056 | 2.13  |
| Q68FD5 | Clathrin heavy chain 1 OS    | 1.27  | 0.056 | 2.94  |
| P63011 | Ras-related protein Rab-3    | 1.74  | 0.061 | 2.88  |
| Q9CQE3 | 28S ribosomal protein S1     | -1.10 | 0.062 | -0.73 |
| Q8VE22 | 28S ribosomal protein S2     | -1.26 | 0.062 | -0.61 |
| Q9CQR4 | Acyl-coenzyme A thioeste     | 1.17  | 0.062 | 1.67  |
| P17182 | Alpha-enolase OS=Mus m       | 1.61  | 0.062 | 1.88  |
| Q9CZS1 | Aldehyde dehydrogenase       | -0.99 | 0.064 | -0.72 |
| P58059 | 28S ribosomal protein S2     | -1.27 | 0.065 | -0.65 |
| Q9D3D9 | ATP synthase subunit delt    | 1.44  | 0.066 | 0.72  |
| Q8BTX9 | Inactive hydroxysteroid d    | -1.34 | 0.068 | -0.79 |
| Q9DC69 | NADH dehydrogenase [uk       | 2.92  | 0.068 | 0.82  |

|        |                             |       |       |       |
|--------|-----------------------------|-------|-------|-------|
| Q8K3J1 | NADH dehydrogenase [uk      | 3.19  | 0.070 | 1.21  |
| P14152 | Malate dehydrogenase, c     | 1.37  | 0.083 | 2.66  |
| P09411 | Phosphoglycerate kinase     | 1.26  | 0.086 | 2.34  |
| Q9D0S9 | Histidine triad nucleotide- | 1.09  | 0.087 | 0.82  |
| Q9CXZ1 | NADH dehydrogenase [uk      | 1.23  | 0.087 | 0.82  |
| Q3UIU2 | NADH dehydrogenase [uk      | 4.53  | 0.088 | 0.67  |
| P17751 | Triosephosphate isomera     | 1.26  | 0.088 | 2.89  |
| P56480 | ATP synthase subunit bet    | 0.24  | 0.095 | 0.72  |
| Q9CQV7 | Mitochondrial import inn    | -1.12 | 0.097 | -0.71 |
| P99029 | Peroxiredoxin-5, mitoch     | 0.81  | 0.098 | 1.28  |
| Q99N96 | 39S ribosomal protein L1,   | -1.23 | 0.100 | -0.89 |
| Q3UUI3 | Acyl-coenzyme A thioeste    | 1.05  | 0.100 | 1.14  |
| Q9WUM5 | Succinate--CoA ligase [AD   | 1.16  | 0.104 | 1.26  |
| Q9CR68 | Cytochrome b-c1 comple      | 0.77  | 0.111 | 0.75  |
| Q99LC3 | NADH dehydrogenase [uk      | 1.14  | 0.112 | 0.62  |
| Q9CQE1 | Protein NipSnap homolog     | -1.26 | 0.115 | -1.15 |
| P12787 | Cytochrome c oxidase suk    | 0.72  | 0.125 | 0.64  |
| P56135 | ATP synthase subunit f, m   | 2.76  | 0.125 | 0.69  |
| Q9D1B9 | 39S ribosomal protein L2&   | -1.13 | 0.127 | -0.58 |
| Q9D0K2 | Succinyl-CoA:3-ketoacid c   | 1.16  | 0.127 | -0.39 |
| P51175 | Protoporphyrinogen oxid     | -1.35 | 0.127 | 0.74  |
| Q922B1 | O-acetyl-ADP-ribose deac    | 1.72  | 0.127 | 1.64  |
| Q8CAQ8 | MICOS complex subunit N     | 0.67  | 0.134 | 0.41  |
| Q9CWE0 | Mitochondrial fission regu  | 1.43  | 0.139 | 0.48  |
| Q9D6K8 | FUN14 domain-containing     | 1.23  | 0.139 | 0.91  |
| Q8R164 | Valacyclovir hydrolase OS   | 1.33  | 0.139 | 1.38  |
| Q9CQ92 | Mitochondrial fission 1 pr  | 2.04  | 0.139 | 0.97  |
| Q9CZ13 | Cytochrome b-c1 comple      | -1.48 | 0.144 | 0.76  |
| Q811U4 | Mitofusin-1 OS=Mus mus      | -1.30 | 0.144 | -0.67 |
| Q9CQX8 | 28S ribosomal protein S3t   | 0.93  | 0.144 | 0.70  |
| Q9DB77 | Cytochrome b-c1 complex     | 0.55  | 0.144 | 0.81  |
| Q91WC3 | Long-chain-fatty-acid--Co.  | 2.13  | 0.144 | 1.43  |
| Q8BH59 | Calcium-binding mitochor    | 0.59  | 0.148 | 0.90  |
| P51660 | Peroxisomal multifunctio    | -0.77 | 0.155 | -1.03 |
| P56379 | 6.8 kDa mitochondrial prc   | 1.20  | 0.155 | 0.76  |
| Q6ZWN5 | 40S ribosomal protein S9    | -1.90 | 0.155 | -2.72 |
| Q3UJU9 | Regulator of microtubule    | 0.96  | 0.156 | 1.29  |
| Q99J39 | Malonyl-CoA decarboxyla     | 0.90  | 0.157 | 0.46  |
| P97807 | Fumarate hydratase, mitc    | 0.96  | 0.158 | 0.70  |
| Q9DBG3 | AP-2 complex subunit bet    | 0.89  | 0.158 | 2.27  |
| Q8K0Z7 | Translational activator of  | -0.92 | 0.165 | 0.57  |
| Q9CPP6 | NADH dehydrogenase [uk      | 1.47  | 0.175 | 0.80  |

|        |                             |       |       |       |
|--------|-----------------------------|-------|-------|-------|
| Q9DCS9 | NADH dehydrogenase [uk      | 0.76  | 0.179 | 0.74  |
| Q921H8 | 3-ketoacyl-CoA thiolase A   | -1.35 | 0.179 | -1.69 |
| Q9Z2Q5 | 39S ribosomal protein L4(   | -1.00 | 0.191 | -1.28 |
| O55125 | Protein NipSnap homolog     | 1.48  | 0.191 | 0.62  |
| P03921 | NADH-ubiquinone oxidori     | 1.18  | 0.193 | 0.82  |
| Q99LY9 | NADH dehydrogenase [uk      | 3.59  | 0.198 | 0.68  |
| P35486 | Pyruvate dehydrogenase      | 0.54  | 0.198 | 0.98  |
| Q9CPQ8 | ATP synthase subunit g, n   | 1.84  | 0.198 | 1.23  |
| Q9DCX2 | ATP synthase subunit d, n   | 0.79  | 0.202 | 0.72  |
| Q9CQN7 | 39S ribosomal protein L4(   | -0.99 | 0.210 | -0.56 |
| Q9D023 | Mitochondrial pyruvate c:   | 1.07  | 0.210 | 0.34  |
| Q91WD5 | NADH dehydrogenase [uk      | 0.78  | 0.210 | 0.72  |
| Q61102 | ATP-binding cassette sub-   | 2.63  | 0.212 | 0.82  |
| P85094 | Isochorismatase domain-(    | 3.41  | 0.212 | 1.83  |
| P63101 | 14-3-3 protein zeta/delta   | 0.95  | 0.221 | 1.36  |
| Q91VA6 | Polymerase delta-interact   | -0.83 | 0.231 | -0.42 |
| Q3KNM2 | E3 ubiquitin-protein ligase | -0.77 | 0.232 | -0.75 |
| Q9EQ20 | Methylmalonate-semialdi     | 0.84  | 0.232 | 0.61  |
| Q91VR2 | ATP synthase subunit gan    | 0.50  | 0.232 | 0.74  |
| O09111 | NADH dehydrogenase [uk      | 0.82  | 0.233 | 0.87  |
| Q99J99 | 3-mercaptopyruvate sulfu    | -0.81 | 0.239 | -0.76 |
| Q9CPQ1 | Cytochrome c oxidase suk    | 0.74  | 0.245 | 0.76  |
| Q99N92 | 39S ribosomal protein L2(   | -0.93 | 0.245 | -0.68 |
| Q8VEM8 | Phosphate carrier protein   | 0.49  | 0.249 | 0.74  |
| Q8VDT9 | 39S ribosomal protein L5(   | -0.85 | 0.249 | -1.08 |
| P61922 | 4-aminobutyrate aminotr     | 0.74  | 0.249 | 1.61  |
| Q9D6J5 | NADH dehydrogenase [uk      | 0.67  | 0.250 | 0.84  |
| Q9D051 | Pyruvate dehydrogenase      | -0.77 | 0.252 | 0.93  |
| Q78IK2 | Up-regulated during skele   | -0.54 | 0.259 | 0.54  |
| Q9DCJ5 | NADH dehydrogenase [uk      | 0.69  | 0.264 | 0.91  |
| P29758 | Ornithine aminotransfera    | 0.95  | 0.275 | -0.69 |
| Q8BGC4 | Prostaglandin reductase-(   | -0.76 | 0.279 | 1.38  |
| Q9DCT2 | NADH dehydrogenase [uk      | 0.56  | 0.288 | 0.99  |
| Q9Z2I9 | Succinate--CoA ligase [AD   | 0.65  | 0.293 | 1.22  |
| Q80VL1 | Tudor and KH domain-cor     | 1.64  | 0.297 | -1.27 |
| Q8BU88 | 39S ribosomal protein L2(   | -0.69 | 0.299 | -0.69 |
| P62897 | Cytochrome c, somatic O(    | 0.81  | 0.300 | 0.55  |
| Q9EQI8 | 39S ribosomal protein L4(   | -1.50 | 0.306 | -1.04 |
| Q9JIK9 | 28S ribosomal protein S3(   | -1.84 | 0.306 | -0.83 |
| Q5HZI9 | Solute carrier family 25 m  | 1.66  | 0.306 | 0.62  |
| Q9CQZ6 | NADH dehydrogenase [uk      | 0.61  | 0.306 | 0.74  |
| O55126 | Protein NipSnap homolog     | 0.70  | 0.306 | 0.77  |

|        |                            |       |       |       |
|--------|----------------------------|-------|-------|-------|
| Q8VE33 | Ganglioside-induced diffe  | 0.73  | 0.317 | 0.61  |
| Q921G7 | Electron transfer flavopro | 2.43  | 0.317 | 0.39  |
| Q9D338 | 39S ribosomal protein L19  | -1.00 | 0.318 | -0.80 |
| Q91YP2 | Neurolysin, mitochondria   | -0.84 | 0.319 | -0.86 |
| Q80X85 | 28S ribosomal protein S7,  | -0.64 | 0.344 | -0.55 |
| Q8BGH2 | Sorting and assembly mac   | 2.16  | 0.344 | 0.56  |
| Q9D0G0 | 28S ribosomal protein S31  | -1.33 | 0.347 | -0.60 |
| Q8BGX2 | Mitochondrial import inn   | -0.60 | 0.351 | 0.46  |
| Q8JZU2 | Tricarboxylate transport p | -0.59 | 0.355 | -0.59 |
| Q8R404 | MICOS complex subunit M    | 1.49  | 0.381 | 0.62  |
| Q9CQ91 | NADH dehydrogenase [uk     | 0.63  | 0.382 | 1.03  |
| Q9D6M3 | Mitochondrial glutamate    | 0.43  | 0.386 | 0.92  |
| Q9ERD7 | Tubulin beta-3 chain OS=I  | -0.74 | 0.393 | 0.47  |
| Q9ER88 | 28S ribosomal protein S29  | 0.68  | 0.405 | -0.67 |
| P56391 | Cytochrome c oxidase sub   | -0.97 | 0.407 | 0.64  |
| O35459 | Delta(3,5)-Delta(2,4)-dien | -0.47 | 0.410 | -0.88 |
| P47791 | Glutathione reductase, m   | 0.68  | 0.410 | 0.55  |
| O88441 | Metaxin-2 OS=Mus muscu     | 0.97  | 0.422 | 0.57  |
| P52196 | Thiosulfate sulfurtransfer | -0.45 | 0.425 | 0.47  |
| Q9D880 | Mitochondrial import inn   | -0.49 | 0.427 | -0.53 |
| Q9D2G2 | Dihydrolipoyllysine-residu | 0.41  | 0.428 | 0.53  |
| Q8K4F5 | Protein ABHD11 OS=Mus      | 0.57  | 0.445 | 1.44  |
| Q9D0L7 | Armadillo repeat-containi  | -0.49 | 0.457 | -0.82 |
| P51881 | ADP/ATP translocase 2 O9   | 0.52  | 0.457 | 0.67  |
| Q9JKL4 | NADH dehydrogenase [uk     | -0.38 | 0.457 | 0.74  |
| Q8BJZ4 | 28S ribosomal protein S31  | 1.13  | 0.457 | -1.29 |
| P22315 | Ferrochelatase, mitochon   | 0.81  | 0.468 | 0.49  |
| Q9D0M3 | Cytochrome c1, heme pro    | 0.29  | 0.468 | 0.60  |
| Q99L13 | 3-hydroxyisobutyrate deh   | 0.43  | 0.492 | 1.04  |
| P53026 | 60S ribosomal protein L10  | 0.90  | 0.494 | -3.18 |
| Q9CZP5 | Mitochondrial chaperone    | 0.53  | 0.497 | 0.80  |
| Q8BWF0 | Succinate-semialdehyde c   | 0.36  | 0.499 | 0.71  |
| Q4VAE3 | Transmembrane protein 6    | 0.27  | 0.502 | 0.67  |
| Q14C51 | Pentatricopeptide repeat   | -0.49 | 0.504 | -0.91 |
| Q9DB20 | ATP synthase subunit O, r  | 0.34  | 0.518 | 0.71  |
| Q9CQZ5 | NADH dehydrogenase [uk     | 0.28  | 0.518 | 0.76  |
| P56382 | ATP synthase subunit eps   | 0.47  | 0.532 | 0.66  |
| Q9JKC6 | Cell cycle exit and neuron | -0.30 | 0.532 | 1.25  |
| Q91ZA3 | Propionyl-CoA carboxylas   | 0.38  | 0.537 | 0.53  |
| Q99NB1 | Acetyl-coenzyme A synth    | -0.49 | 0.540 | -2.69 |
| Q60930 | Voltage-dependent anion    | 0.26  | 0.542 | 0.85  |
| Q60597 | 2-oxoglutarate dehydroge   | 0.37  | 0.549 | 0.45  |

|        |                                                      |       |       |       |
|--------|------------------------------------------------------|-------|-------|-------|
| Q9DCZ4 | MICOS complex subunit N                              | -0.26 | 0.553 | 0.75  |
| Q91YP0 | L-2-hydroxyglutarate dehydrogenase                   | 0.37  | 0.553 | 0.76  |
| Q91VC9 | Growth hormone-inducible protein 1                   | -0.83 | 0.572 | 0.76  |
| Q8QZS1 | 3-hydroxyisobutyryl-CoA lyase                        | -0.34 | 0.575 | 0.97  |
| P07901 | Heat shock protein HSP 90 class B member 1           | 0.45  | 0.586 | 0.85  |
| Q8BWM0 | Prostaglandin E synthase                             | 0.66  | 0.602 | -0.33 |
| Q9CZW5 | Mitochondrial import receptor subunit TOM20          | 0.82  | 0.602 | 0.49  |
| Q91VT4 | Carbonyl reductase family 1 member A1                | -0.39 | 0.603 | 0.46  |
| Q9CR61 | NADH dehydrogenase [ubiquinone]                      | 0.28  | 0.603 | 1.51  |
| O88967 | ATP-dependent zinc metalloprotease                   | 0.32  | 0.604 | -0.67 |
| Q99MN9 | Propionyl-CoA carboxylase subunit alpha              | -0.29 | 0.608 | 0.55  |
| P00405 | Cytochrome c oxidase subunit 1                       | -0.11 | 0.614 | 0.60  |
| P48962 | ADP/ATP translocase 1 OSCP                           | -0.46 | 0.625 | 0.88  |
| Q9CPR5 | 39S ribosomal protein L15                            | -0.38 | 0.625 | -1.20 |
| Q9CQH3 | NADH dehydrogenase [ubiquinone]                      | 0.31  | 0.625 | 0.89  |
| Q8JZQ2 | AFG3-like protein 2 OS=Mus mus                       | 0.31  | 0.642 | 0.62  |
| Q9D6K5 | Synaptojanin-2-binding protein 1                     | 0.35  | 0.642 | 1.06  |
| Q9EP89 | Serine beta-lactamase-like protein                   | -0.36 | 0.697 | 0.40  |
| Q9D6J6 | NADH dehydrogenase [ubiquinone]                      | 0.21  | 0.705 | 0.69  |
| P48771 | Cytochrome c oxidase subunit 2                       | 0.18  | 0.717 | 0.60  |
| Q9QZD8 | Mitochondrial dicarboxylate carrier                  | -0.31 | 0.720 | 1.19  |
| P59017 | Bcl-2-like protein 13 OS=Mus mus                     | -0.52 | 0.724 | -0.55 |
| Q8BGT5 | Alanine aminotransferase                             | -0.38 | 0.730 | -1.81 |
| Q9D3P8 | Plasminogen receptor (KRT18)                         | -0.32 | 0.730 | -1.35 |
| Q8BHF7 | CDP-diacylglycerol--glycerol-3-phosphate transferase | -0.18 | 0.730 | 0.96  |
| Q9CQA3 | Succinate dehydrogenase                              | -0.25 | 0.732 | 0.37  |
| Q8BKZ9 | Pyruvate dehydrogenase                               | 0.23  | 0.732 | 0.98  |
| Q9CRB9 | MICOS complex subunit N                              | -0.20 | 0.754 | 0.41  |
| Q9CPV4 | Glyoxalase domain-containing protein                 | 0.34  | 0.757 | 1.44  |
| Q5M8N4 | Epimerase family protein                             | 0.43  | 0.759 | -0.80 |
| Q922H2 | [Pyruvate dehydrogenase]                             | 0.39  | 0.759 | 0.65  |
| Q99JR1 | Sideroflexin-1 OS=Mus mus                            | -0.16 | 0.760 | -0.42 |
| Q9CQJ8 | NADH dehydrogenase [ubiquinone]                      | 0.20  | 0.765 | 0.92  |
| Q9DC70 | NADH dehydrogenase [ubiquinone]                      | 0.11  | 0.793 | 0.71  |
| Q8CI78 | Required for meiotic nuclear envelope breakdown      | 0.19  | 0.802 | 0.66  |
| Q06185 | ATP synthase subunit e, nuclear                      | 0.14  | 0.802 | 0.68  |
| P58281 | Dynamin-like 120 kDa protein                         | 0.18  | 0.805 | 0.53  |
| P32020 | Non-specific lipid-transfer protein                  | -0.36 | 0.814 | -1.25 |
| Q64521 | Glycerol-3-phosphate dehydrogenase                   | 0.17  | 0.815 | 0.70  |
| Q9CZN8 | Glutamyl-tRNA(Gln) amidotransferase                  | -0.31 | 0.820 | 0.81  |
| Q60931 | Voltage-dependent anion channel                      | 0.11  | 0.839 | 0.37  |
| P03930 | ATP synthase protein 8 OSCP                          | -0.09 | 0.845 | 0.56  |

|        |                            |       |       |       |
|--------|----------------------------|-------|-------|-------|
| Q8BK72 | 28S ribosomal protein S2   | 0.22  | 0.847 | -0.67 |
| Q8R4N0 | Citrate lyase subunit beta | 0.11  | 0.865 | 1.12  |
| Q80U63 | Mitofusin-2 OS=Mus mus     | 0.13  | 0.868 | 0.34  |
| Q9CQQ7 | ATP synthase F(0) comple   | 0.09  | 0.880 | 0.77  |
| P68254 | 14-3-3 protein theta OS=f  | -0.16 | 0.888 | 3.84  |
| P62259 | 14-3-3 protein epsilon OS  | 0.11  | 0.890 | 1.06  |
| Q3UV70 | [Pyruvate dehydrogenase    | 0.10  | 0.893 | 0.89  |
| Q9CPX8 | Cytochrome b-c1 complex    | -0.25 | 0.893 | 0.95  |
| Q6PB66 | Leucine-rich PPR motif-co  | -0.15 | 0.896 | -0.79 |
| P62075 | Mitochondrial import inn   | -0.12 | 0.897 | 0.63  |
| Q8BIJ6 | Isoleucine--tRNA ligase, m | -0.09 | 0.899 | 0.64  |
| Q8C163 | Nuclease EXOG, mitochor    | -0.09 | 0.901 | 0.37  |
| Q8K2B3 | Succinate dehydrogenase    | 0.15  | 0.903 | 0.29  |
| Q9D1N9 | 39S ribosomal protein L2   | -0.12 | 0.913 | -0.76 |
| Q60932 | Voltage-dependent anion    | -0.06 | 0.917 | 0.91  |
| Q99KB8 | Hydroxyacylglutathione h   | 0.11  | 0.926 | 1.77  |
| Q3TC33 | Coiled-coil domain-contai  | 0.15  | 0.932 | 0.73  |
| Q9WV84 | Nucleoside diphosphate k   | 0.15  | 0.940 | -0.94 |
| Q2TPA8 | Hydroxysteroid dehydrog    | 0.17  | 0.948 | -0.50 |
| Q9Z2I0 | Mitochondrial proton/cal   | 0.06  | 0.948 | 0.48  |
| Q791V5 | Mitochondrial carrier hon  | 0.06  | 0.948 | 0.57  |
| Q9CQ75 | NADH dehydrogenase [uk     | 0.05  | 0.948 | 0.75  |
| P35700 | Peroxiredoxin-1 OS=Mus     | 0.11  | 0.948 | 1.08  |
| Q3ULF4 | Paraplegin OS=Mus musc     | 0.11  | 0.948 | 2.19  |
| Q5ND52 | rRNA methyltransferase 3   | 0.10  | 0.949 | -1.54 |
| Q9QXX4 | Calcium-binding mitochor   | 0.09  | 0.951 | 0.72  |
| P42125 | Enoyl-CoA delta isomeras   | 0.04  | 0.958 | 0.51  |
| Q8C5H8 | NAD kinase 2, mitochond    | -0.04 | 0.961 | 0.32  |
| P20108 | Thioredoxin-dependent p    | -0.02 | 0.962 | 0.51  |
| P19783 | Cytochrome c oxidase suk   | 0.02  | 0.962 | 0.69  |
| P19536 | Cytochrome c oxidase suk   | 0.02  | 0.983 | 0.70  |
| P45952 | Medium-chain specific ac   | 0.02  | 0.983 | -0.45 |
| Q91V61 | Sideroflexin-3 OS=Mus m    | -0.02 | 0.983 | 0.75  |
| Q9D8T7 | SRA stem-loop-interactin   | 0.02  | 0.986 | -0.74 |
| Q8BFR5 | Elongation factor Tu, mitc | -0.01 | 0.986 | 0.29  |
| Q9CXJ4 | ATP-binding cassette sub-  | -0.02 | 0.986 | 0.55  |
| Q8K215 | LYR motif-containing prot  | 0.02  | 0.986 | 0.60  |
| Q9ERS2 | NADH dehydrogenase [uk     | 0.01  | 0.986 | 0.78  |
| Q91VM9 | Inorganic pyrophosphata    | 0.02  | 0.986 | 0.84  |
| Q9Z1P6 | NADH dehydrogenase [uk     | -0.01 | 0.986 | 0.85  |
| Q505D7 | Optic atrophy 3 protein h  | -0.01 | 0.987 | 0.66  |
| Q91VN4 | MICOS complex subunit N    | -0.01 | 0.987 | 0.52  |

|        |                             |       |       |       |
|--------|-----------------------------|-------|-------|-------|
| O08734 | Bcl-2 homologous antago     | -1.15 | 0.050 | -1.73 |
| P50431 | Serine hydroxymethyltrar    | -2.21 | 0.050 | -0.97 |
| Q8BMS1 | Trifunctional enzyme subi   | 1.60  | 0.050 | 0.30  |
| Q9D8E6 | 60S ribosomal protein L4    | -1.83 | 0.052 | -0.66 |
| O88986 | 2-amino-3-ketobutyrate c    | -1.94 | 0.057 | -0.32 |
| Q61578 | NADPH:adrenodoxin oxid      | -1.00 | 0.061 | -0.13 |
| P14869 | 60S acidic ribosomal proti  | -1.37 | 0.062 | -1.58 |
| Q99JB2 | Stomatin-like protein 2, n  | 2.17  | 0.062 | -0.02 |
| P14148 | 60S ribosomal protein L7    | -0.99 | 0.068 | -0.67 |
| P54071 | Isocitrate dehydrogenase    | -1.06 | 0.068 | -0.10 |
| Q91V92 | ATP-citrate synthase OS=l   | -1.58 | 0.071 | -3.25 |
| Q3UHB1 | 5'-nucleotidase domain-c    | 1.93  | 0.071 | -0.17 |
| Q8C5Q4 | G-rich sequence factor 1 (  | -1.46 | 0.071 | 1.03  |
| Q9CTY5 | Calcium uptake protein 3,   | 1.42  | 0.072 | 0.39  |
| Q8K2Y7 | 39S ribosomal protein L47   | 1.59  | 0.075 | -0.28 |
| Q99LB2 | Dehydrogenase/reductas      | 1.22  | 0.077 | 0.71  |
| Q9DCU6 | 39S ribosomal protein L4,   | -1.24 | 0.083 | -0.53 |
| P14211 | Calreticulin OS=Mus musc    | -1.52 | 0.086 | -0.50 |
| Q9CR88 | 28S ribosomal protein S14   | -1.18 | 0.088 | -3.35 |
| Q9QZH6 | Evolutionarily conserved :  | -1.24 | 0.088 | -0.21 |
| Q60714 | Long-chain fatty acid tran  | -0.96 | 0.088 | 0.15  |
| P67778 | Prohibitin OS=Mus muscu     | -0.64 | 0.100 | -0.02 |
| O08756 | 3-hydroxyacyl-CoA dehyd     | -0.91 | 0.112 | -0.23 |
| Q9CQU0 | Thioredoxin domain-cont.    | -2.11 | 0.126 | -0.22 |
| P09925 | Surfeit locus protein 1 OS  | 1.85  | 0.127 | 0.10  |
| Q9CQN1 | Heat shock protein 75 kDa   | -0.89 | 0.127 | -0.36 |
| Q8VCL2 | Protein SCO2 homolog, m     | -1.18 | 0.127 | 0.08  |
| Q99JY0 | Trifunctional enzyme subi   | 2.83  | 0.127 | 0.28  |
| Q91WM2 | Haloacid dehalogenase-lil   | 1.80  | 0.129 | -0.20 |
| Q9JKF7 | 39S ribosomal protein L35   | -1.13 | 0.131 | -0.46 |
| Q91YM4 | Protein TBRG4 OS=Mus m      | -1.25 | 0.132 | 0.29  |
| P38647 | Stress-70 protein, mitoch   | 0.73  | 0.139 | -0.08 |
| Q99JT1 | Glutamyl-tRNA(Gln) amid     | -1.00 | 0.142 | 3.05  |
| Q8BMF3 | NADP-dependent malic ei     | 1.25  | 0.142 | -0.74 |
| Q9DCC8 | Mitochondrial import rec    | -1.02 | 0.144 | 0.00  |
| Q9CRD0 | OCIA domain-containing p    | 2.80  | 0.144 | 0.06  |
| Q8K4Z3 | NAD(P)H-hydrate epimer:     | 1.76  | 0.144 | 0.17  |
| Q9Z2I8 | Succinate--CoA ligase [GD   | -0.82 | 0.144 | 0.29  |
| Q8BUY5 | Complex I assembly facto    | -0.75 | 0.145 | -0.55 |
| Q91YJ5 | Translation initiation fact | -0.90 | 0.158 | -0.33 |
| Q9CQS4 | Solute carrier family 25 m  | 1.14  | 0.159 | -0.21 |
| Q9WTP6 | Adenylate kinase 2, mitoc   | 3.00  | 0.161 | -0.36 |



|        |                            |       |       |       |
|--------|----------------------------|-------|-------|-------|
| Q3U186 | Probable arginine--tRNA l  | -1.46 | 0.165 | 0.12  |
| O35435 | Dihydroorotate dehydrog    | -0.71 | 0.166 | -0.13 |
| Q3ULD5 | Methylcrotonoyl-CoA carl   | -0.81 | 0.175 | -0.19 |
| Q3TUH1 | Phosphatidate cytidyltr    | -1.89 | 0.193 | -1.07 |
| Q8CHT0 | Delta-1-pyrroline-5-carbo  | -0.73 | 0.206 | -0.20 |
| P50544 | Very long-chain specific a | -0.83 | 0.209 | -0.04 |
| Q9QYF1 | Retinol dehydrogenase 11   | -1.62 | 0.210 | -0.99 |
| Q8BYL4 | Tyrosine--tRNA ligase, mit | 1.38  | 0.211 | -0.13 |
| O88696 | ATP-dependent Clp prote    | -0.61 | 0.216 | -0.15 |
| Q91WK1 | SPRY domain-containing p   | -0.83 | 0.221 | -0.09 |
| Q99J25 | rRNA methyltransferase 1   | -0.98 | 0.222 | -0.91 |
| Q99MR8 | Methylcrotonoyl-CoA carl   | 3.01  | 0.228 | 0.04  |
| Q9D8Y1 | Transmembrane protein 1    | -0.81 | 0.232 | -0.18 |
| Q99LB7 | Sarcosine dehydrogenase    | 2.41  | 0.232 | 0.39  |
| Q9CQV5 | 28S ribosomal protein S24  | -1.43 | 0.234 | -0.51 |
| Q02053 | Ubiquitin-like modifier-ac | 2.11  | 0.234 | 2.69  |
| Q61879 | Myosin-10 OS=Mus musc      | -1.59 | 0.235 | -0.25 |
| Q80ZS3 | 28S ribosomal protein S24  | -1.08 | 0.238 | 0.12  |
| Q92511 | ATPase family AAA domai    | 0.85  | 0.242 | 0.20  |
| P97478 | 5-demethoxyubiquinone      | -0.83 | 0.243 | 2.74  |
| Q78IK4 | MICOS complex subunit N    | 1.26  | 0.246 | -0.27 |
| Q9CZU4 | GTPase Era, mitochondria   | -1.54 | 0.249 | 0.09  |
| Q61387 | Cytochrome c oxidase sub   | -0.77 | 0.253 | -0.05 |
| Q7TSQ8 | Pyruvate dehydrogenase     | -0.72 | 0.253 | 0.27  |
| Q14CH7 | Alanine--tRNA ligase, mitc | -1.01 | 0.266 | -0.02 |
| P62242 | 40S ribosomal protein S8   | -1.31 | 0.267 | -1.96 |
| P52503 | NADH dehydrogenase [uk     | 2.47  | 0.269 | 0.50  |
| P50171 | Estradiol 17-beta-dehydr   | -0.85 | 0.270 | 0.12  |
| Q91YQ5 | Dolichyl-diphosphooligos   | -0.79 | 0.271 | -0.53 |
| B7ZMP1 | Probable Xaa-Pro aminop    | -2.07 | 0.271 | -0.18 |
| P40630 | Transcription factor A, mi | -0.71 | 0.271 | 0.12  |
| Q9CQF0 | 39S ribosomal protein L11  | -1.19 | 0.280 | -0.57 |
| Q922Q1 | Mitochondrial amidoxime    | -1.27 | 0.281 | 0.37  |
| P47911 | 60S ribosomal protein L6   | -0.95 | 0.282 | -0.60 |
| Q9D2R6 | Cytochrome c oxidase ass   | -0.73 | 0.282 | 0.26  |
| P35980 | 60S ribosomal protein L18  | 1.19  | 0.287 | -1.52 |
| Q9CZ42 | ATP-dependent (S)-NAD(F    | 0.84  | 0.287 | 0.21  |
| Q8VCW8 | Acyl-CoA synthetase fami   | 2.06  | 0.288 | -0.07 |
| Q64133 | Amine oxidase [flavin-con  | -0.56 | 0.288 | -0.01 |
| P47738 | Aldehyde dehydrogenase     | 0.92  | 0.289 | -0.25 |
| Q9CWG8 | Protein arginine methyltr  | -0.76 | 0.292 | 0.14  |
| Q9CQB5 | CDGSH iron-sulfur domair   | -1.49 | 0.301 | -0.35 |

|        |                              |       |       |       |
|--------|------------------------------|-------|-------|-------|
| P47963 | 60S ribosomal protein L13    | -0.80 | 0.303 | -0.43 |
| Q9D1D4 | Transmembrane emp24 c        | 1.51  | 0.305 | -0.80 |
| P62889 | 60S ribosomal protein L30    | -0.93 | 0.305 | -0.33 |
| Q9CR98 | Protein FAM136A OS=Mus       | 0.87  | 0.305 | -0.01 |
| Q9D0L4 | Uncharacterized aarF dom     | -0.68 | 0.306 | 0.05  |
| Q9CQV1 | Mitochondrial import inn     | 1.34  | 0.306 | 0.14  |
| Q3UQ84 | Threonine--tRNA ligase, n    | -1.13 | 0.306 | 0.32  |
| Q9DB73 | NADH-cytochrome b5 red       | 2.11  | 0.306 | 0.91  |
| P61027 | Ras-related protein Rab-1    | 1.56  | 0.309 | 0.66  |
| P26443 | Glutamate dehydrogenas       | -0.45 | 0.314 | 0.09  |
| Q9WVA2 | Mitochondrial import inn     | 0.92  | 0.317 | 0.27  |
| Q924L1 | LETM1 domain-containing      | -0.63 | 0.318 | 0.00  |
| Q9JLJ2 | 4-trimethylaminobutyralc     | 0.77  | 0.318 | 0.28  |
| Q8R127 | Saccharopine dehydroger      | 1.96  | 0.329 | 0.08  |
| P36552 | Oxygen-dependent copro       | -1.07 | 0.330 | -0.14 |
| Q91WK5 | Glycine cleavage system h    | -0.91 | 0.335 | 5.22  |
| Q9DBG6 | Dolichyl-diphosphooligos     | 1.94  | 0.339 | -0.27 |
| Q9QZ23 | NFU1 iron-sulfur cluster s   | -0.62 | 0.339 | -0.26 |
| Q99N93 | 39S ribosomal protein L16    | 1.49  | 0.340 | -0.35 |
| O88741 | Ganglioside-induced diffe    | -0.43 | 0.340 | 0.39  |
| P62908 | 40S ribosomal protein S3     | -0.90 | 0.344 | -1.96 |
| Q5U458 | DnaJ homolog subfamily C     | -0.71 | 0.344 | 0.34  |
| Q9QYR9 | Acyl-coenzyme A thioeste     | 1.14  | 0.353 | 0.15  |
| P45878 | Peptidyl-prolyl cis-trans is | -0.64 | 0.355 | -2.71 |
| Q920A7 | AFG3-like protein 1 OS=M     | 1.29  | 0.355 | 0.14  |
| Q8R3Q6 | Coiled-coil domain-contai    | -0.56 | 0.357 | 1.85  |
| P52825 | Carnitine O-palmitoyltran    | -0.70 | 0.368 | 0.24  |
| Q9ESW4 | Acylglycerol kinase, mitoc   | -0.43 | 0.371 | -0.18 |
| Q8BYM8 | Probable cysteine--tRNA l    | 0.78  | 0.376 | 0.49  |
| Q99JI6 | Ras-related protein Rap-1    | -1.26 | 0.381 | 1.82  |
| P97493 | Thioredoxin, mitochondri     | -0.57 | 0.398 | -4.68 |
| Q9DBL1 | Short/branched chain spe     | -0.51 | 0.398 | -0.17 |
| Q9WTP7 | GTP:AMP phosphotransfe       | -0.48 | 0.398 | 0.18  |
| Q9D1H8 | 39S ribosomal protein L52    | -0.87 | 0.406 | -0.17 |
| P35564 | Calnexin OS=Mus musculi      | -0.51 | 0.407 | -0.46 |
| P38060 | Hydroxymethylglutaryl-Cc     | 0.61  | 0.407 | -0.12 |
| Q8BG51 | Mitochondrial Rho GTPas      | 0.45  | 0.407 | 0.17  |
| Q9CQL5 | 39S ribosomal protein L18    | -1.07 | 0.410 | -0.36 |
| Q99L04 | Dehydrogenase/reductas       | -0.95 | 0.422 | 0.26  |
| Q9DBL7 | Bifunctional coenzyme A :    | 1.14  | 0.425 | 4.06  |
| Q99M87 | DnaJ homolog subfamily J     | -0.46 | 0.427 | 0.13  |
| P62270 | 40S ribosomal protein S18    | -0.91 | 0.432 | -0.96 |

|        |                                  |       |       |       |
|--------|----------------------------------|-------|-------|-------|
| Q9CXW2 | 28S ribosomal protein S2:        | -0.56 | 0.434 | -0.40 |
| Q80YD1 | ATP-dependent RNA helic          | -0.55 | 0.434 | 0.29  |
| Q8K1J6 | CCA tRNA nucleotidyltran         | -0.95 | 0.440 | 0.05  |
| P63038 | 60 kDa heat shock proteir        | 0.44  | 0.442 | 0.16  |
| Q9CPY7 | Cytosol aminopeptidase C         | 0.54  | 0.462 | -0.12 |
| Q9D7N3 | 28S ribosomal protein S9,        | -0.42 | 0.463 | -0.39 |
| Q9CYR0 | Single-stranded DNA-binc         | 1.05  | 0.463 | -0.35 |
| Q8VDP6 | CDP-diacylglycerol--inosit       | 0.51  | 0.468 | -2.43 |
| Q60649 | Caseinolytic peptidase B $\beta$ | -0.58 | 0.468 | -0.24 |
| Q8VCF0 | Mitochondrial antiviral-siq      | 1.07  | 0.468 | -0.16 |
| Q8K2M0 | 39S ribosomal protein L3 $\xi$   | -0.57 | 0.468 | -0.13 |
| P46638 | Ras-related protein Rab-1        | -0.45 | 0.473 | -0.41 |
| P50136 | 2-oxoisovalerate dehydro         | -0.51 | 0.473 | 0.10  |
| Q66GT5 | Phosphatidylglycerophos $\beta$  | 1.05  | 0.473 | 0.54  |
| O35857 | Mitochondrial import inn         | -0.43 | 0.474 | 0.01  |
| P62874 | Guanine nucleotide-bindi         | 0.56  | 0.477 | -0.70 |
| P62830 | 60S ribosomal protein L2 $\xi$   | -1.02 | 0.487 | 0.59  |
| P97742 | Carnitine O-palmitoyltran        | 0.98  | 0.487 | 0.02  |
| Q8K411 | Presequence protease, m          | -0.43 | 0.492 | -0.21 |
| Q8BFP9 | [Pyruvate dehydrogenase          | 0.41  | 0.493 | -0.13 |
| Q8R3F5 | Malonyl-CoA-acyl carrier $\beta$ | -0.87 | 0.499 | -0.48 |
| Q3U2A8 | Valine--tRNA ligase, mitoc       | -0.39 | 0.513 | -0.43 |
| Q61207 | Prosaposin OS=Mus musc           | -0.71 | 0.518 | -0.78 |
| Q91W43 | Glycine dehydrogenase (c         | 0.67  | 0.518 | -0.43 |
| Q8JZN5 | Acyl-CoA dehydrogenase           | -0.39 | 0.518 | -0.06 |
| P51150 | Ras-related protein Rab-7        | 0.56  | 0.526 | 0.04  |
| Q924T2 | 28S ribosomal protein S2,        | -0.51 | 0.530 | -0.43 |
| Q9QYA2 | Mitochondrial import rec         | -0.37 | 0.532 | -0.25 |
| O35129 | Prohibitin-2 OS=Mus mus          | -0.38 | 0.532 | -0.06 |
| Q3TIU4 | 2',5'-phosphodiesterase 1        | -0.62 | 0.532 | 0.24  |
| Q9CZX8 | 40S ribosomal protein S1 $\xi$   | -0.71 | 0.540 | 1.34  |
| Q9D1P0 | 39S ribosomal protein L1 $\xi$   | -0.64 | 0.553 | -4.48 |
| Q9JHI5 | Isovaleryl-CoA dehydroge         | 0.57  | 0.553 | 0.09  |
| P09103 | Protein disulfide-isomera:       | -0.51 | 0.564 | -0.72 |
| Q9D6S7 | Ribosome-recycling facto         | -0.40 | 0.570 | 0.02  |
| Q99N94 | 39S ribosomal protein L9,        | 0.41  | 0.571 | -0.54 |
| P47740 | Fatty aldehyde dehydroge         | 0.33  | 0.575 | 2.26  |
| Q924D0 | Reticulon-4-interacting pr       | -0.57 | 0.585 | 0.19  |
| Q6PE15 | Mycophenolic acid acyl-gl        | -0.30 | 0.602 | -0.99 |
| Q9DCB8 | Iron-sulfur cluster assem        | -0.33 | 0.602 | 0.20  |
| P63037 | DnaJ homolog subfamily $\beta$   | 0.63  | 0.602 | 0.33  |
| Q9JL8  | Serine--tRNA ligase, mitoc       | -0.34 | 0.603 | 0.14  |

|        |                            |       |       |       |
|--------|----------------------------|-------|-------|-------|
| Q9CQX2 | Cytochrome b5 type B OS    | 0.33  | 0.605 | 0.50  |
| Q8CC88 | von Willebrand factor A d  | -0.47 | 0.608 | 0.31  |
| Q3TBW2 | 39S ribosomal protein L1C  | -0.69 | 0.609 | -0.98 |
| Q922Q4 | Pyrroline-5-carboxylate re | -0.34 | 0.611 | -0.49 |
| Q8VEG4 | Exonuclease 3'-5' domain   | 0.46  | 0.612 | 0.00  |
| Q9R0X4 | Acyl-coenzyme A thioeste   | 0.38  | 0.623 | -0.11 |
| P58252 | Elongation factor 2 OS=M   | -0.48 | 0.627 | -0.19 |
| Q8CGK3 | Lon protease homolog, m    | -0.31 | 0.640 | -0.07 |
| Q8BSF4 | Phosphatidylserine decaril | 0.59  | 0.640 | 0.63  |
| P20029 | 78 kDa glucose-regulated   | -0.36 | 0.641 | -0.38 |
| Q8R3K3 | Pentatricopeptide repeat   | -0.51 | 0.656 | -0.64 |
| Q3UMR5 | Calcium uniporter proteir  | -0.31 | 0.661 | 0.10  |
| Q64433 | 10 kDa heat shock proteir  | 0.16  | 0.679 | 0.11  |
| Q8BK08 | Transmembrane protein :    | 0.39  | 0.680 | -0.10 |
| Q8K0D5 | Elongation factor G, mito  | 0.40  | 0.685 | -0.22 |
| Q80UU9 | Membrane-associated pr     | -0.38 | 0.687 | -0.13 |
| P35278 | Ras-related protein Rab-5  | -0.24 | 0.704 | 0.22  |
| Q921S7 | 39S ribosomal protein L37  | -0.29 | 0.708 | -0.24 |
| P16332 | Methylmalonyl-CoA muta     | -0.29 | 0.710 | 0.03  |
| Q80XN0 | D-beta-hydroxybutyrate c   | -0.22 | 0.717 | -0.37 |
| Q59J78 | Mimitin, mitochondrial O:  | 0.40  | 0.717 | -0.09 |
| P47802 | Metaxin-1 OS=Mus muscu     | -0.44 | 0.717 | 0.44  |
| Q8BH95 | Enoyl-CoA hydratase, mit   | -0.23 | 0.726 | 0.01  |
| Q9WV98 | Mitochondrial import inn   | -0.24 | 0.727 | 0.21  |
| Q9D773 | 39S ribosomal protein L2,  | -0.34 | 0.732 | -3.26 |
| Q9JIY5 | Serine protease HTRA2, n   | -0.24 | 0.732 | -0.08 |
| Q5IRJ6 | Zinc transporter 9 OS=Mu   | -0.20 | 0.732 | 0.05  |
| Q9QUJ7 | Long-chain-fatty-acid--Co. | -0.74 | 0.734 | 0.22  |
| O35114 | Lysosome membrane pro      | -0.50 | 0.736 | 0.15  |
| Q9Z0X1 | Apoptosis-inducing factor  | 0.23  | 0.739 | 0.29  |
| Q9CQ62 | 2,4-dienoyl-CoA reductas   | -0.27 | 0.741 | -0.22 |
| Q99KE1 | NAD-dependent malic en:    | -0.25 | 0.741 | -0.09 |
| Q810S1 | Calcium uniporter regulat  | -0.41 | 0.752 | -0.61 |
| Q61941 | NAD(P) transhydrogenase    | 0.21  | 0.752 | 0.50  |
| Q3URS9 | Coiled-coil domain-contai  | -0.33 | 0.754 | 0.17  |
| Q9D7B6 | Isobutyryl-CoA dehydroge   | -0.24 | 0.757 | 0.32  |
| Q9WV54 | Acid ceramidase OS=Mus     | -0.39 | 0.757 | 2.87  |
| Q99J47 | Dehydrogenase/reductas     | 0.33  | 0.765 | -0.58 |
| Q9CXT8 | Mitochondrial-processing   | 0.30  | 0.765 | -0.34 |
| Q9WTM5 | RuvB-like 2 OS=Mus musc    | 0.18  | 0.781 | 0.78  |
| Q8BH55 | Threonine synthase-like 1  | 0.18  | 0.785 | 0.00  |
| Q8VDC0 | Probable leucine--tRNA liq | -0.34 | 0.788 | 0.01  |

|        |                              |       |       |       |
|--------|------------------------------|-------|-------|-------|
| P18572 | Basigin OS=Mus musculus      | -0.43 | 0.788 | 0.19  |
| Q9CQ06 | 39S ribosomal protein L24    | 0.31  | 0.790 | -0.47 |
| Q9DB25 | Dolichyl-phosphate beta-4    | -0.26 | 0.791 | -0.61 |
| Q9DB41 | Mitochondrial glutamate      | -0.20 | 0.802 | 0.51  |
| P51174 | Long-chain specific acyl-C   | -0.16 | 0.823 | -0.15 |
| P99024 | Tubulin beta-5 chain OS=M    | -0.22 | 0.836 | -0.18 |
| Q9D5T0 | ATPase family AAA domain     | -0.24 | 0.836 | -0.10 |
| Q8VDD5 | Myosin-9 OS=Mus muscu        | 0.42  | 0.839 | -0.41 |
| Q9CRD2 | ER membrane protein cor      | -0.28 | 0.839 | -0.37 |
| Q9D1E8 | 1-acyl-sn-glycerol-3-phos    | 0.39  | 0.842 | 0.69  |
| Q5SUC9 | Protein SCO1 homolog, m      | -0.18 | 0.859 | 0.18  |
| Q9CWU6 | Ubiquinol-cytochrome-c r     | -0.14 | 0.865 | 0.36  |
| P80313 | T-complex protein 1 subu     | -0.25 | 0.867 | -1.40 |
| Q9DCN2 | NADH-cytochrome b5 red       | 0.15  | 0.867 | -0.64 |
| P62245 | 40S ribosomal protein S15    | -0.24 | 0.878 | 0.08  |
| Q62186 | Translocon-associated pr     | 0.22  | 0.890 | -0.38 |
| O08807 | Peroxiredoxin-4 OS=Mus       | -0.19 | 0.890 | -0.35 |
| Q8K1R3 | Polyribonucleotide nucle     | -0.22 | 0.890 | 0.31  |
| Q9WUR2 | Enoyl-CoA delta isomeras     | -0.15 | 0.897 | 0.00  |
| Q9JLT4 | Thioredoxin reductase 2,     | -0.21 | 0.898 | -0.07 |
| Q9CPU4 | Microsomal glutathione S     | 0.22  | 0.903 | -1.16 |
| O54734 | Dolichyl-diphosphooligos     | 0.15  | 0.913 | -1.63 |
| P47934 | Carnitine O-acetyltransfer   | 0.10  | 0.914 | 0.19  |
| Q3V3R1 | Monofunctional C1-tetra      | -0.08 | 0.917 | 0.45  |
| Q6ZQI3 | Malectin OS=Mus muscul       | 0.17  | 0.918 | -0.71 |
| Q9CZD3 | Glycine--tRNA ligase OS=M    | -0.07 | 0.930 | 0.39  |
| Q9DCS3 | Enoyl-[acyl-carrier-proteir  | -0.12 | 0.940 | 0.09  |
| Q8R2Y8 | Peptidyl-tRNA hydrolase 2    | 0.08  | 0.948 | -0.59 |
| P08113 | Endoplasmin OS=Mus mu        | 0.12  | 0.948 | -0.50 |
| Q99LP6 | GrpE protein homolog 1, i    | -0.09 | 0.948 | -0.28 |
| Q9Z2Z6 | Mitochondrial carnitine/a    | -0.12 | 0.948 | -0.22 |
| P11499 | Heat shock protein HSP 90    | -0.12 | 0.948 | 0.24  |
| Q9CZB0 | Succinate dehydrogenase      | 0.11  | 0.948 | 0.26  |
| Q925N0 | Sideroflexin-5 OS=Mus m      | -0.06 | 0.948 | 0.32  |
| P63276 | 40S ribosomal protein S17    | 0.13  | 0.948 | 0.33  |
| Q91V12 | Cytosolic acyl coenzyme A    | 0.06  | 0.948 | 1.53  |
| P63321 | Ras-related protein Ral-A    | -0.09 | 0.948 | 4.05  |
| Q8VBT0 | Thioredoxin-related trans    | -0.09 | 0.949 | -0.05 |
| Q9DC61 | Mitochondrial-processing     | -0.08 | 0.949 | -0.02 |
| Q99N95 | 39S ribosomal protein L3,    | -0.09 | 0.951 | -1.22 |
| O35465 | Peptidyl-prolyl cis-trans is | 0.06  | 0.958 | -0.35 |
| Q8VCX5 | Calcium uptake protein 1,    | -0.05 | 0.958 | -0.18 |

|        |                           |       |       |       |
|--------|---------------------------|-------|-------|-------|
| Q8BHE8 | m-AAA protease-interacti  | 0.04  | 0.958 | 0.44  |
| Q9D710 | Thioredoxin-related trans | 0.06  | 0.961 | -0.12 |
| Q9DCM0 | Persulfide dioxygenase ET | 0.03  | 0.969 | 0.07  |
| Q60759 | Glutaryl-CoA dehydrogen.  | 0.04  | 0.983 | 0.08  |
| Q99M04 | Lipoyl synthase, mitochor | -0.04 | 0.986 | 0.02  |
| Q9D8S9 | BolA-like protein 1 OS=Mi | -0.02 | 0.987 | -0.18 |
| Q8BHN3 | Neutral alpha-glucosidase | 0.01  | 0.996 | -0.71 |

SILAC BH

0.000  
0.000  
0.000  
0.000  
0.000  
0.001  
0.005  
0.000  
0.000  
0.012  
0.000  
0.000  
0.000  
0.000  
0.000  
0.013  
0.000  
0.014  
0.006  
0.000  
0.016  
0.005  
0.000  
0.000  
0.000  
0.001  
0.007  
0.032  
0.000  
0.000  
0.000  
0.005  
0.008  
0.029  
0.001  
0.014  
0.013  
0.031  
0.043  
0.000

0.183

0.560  
0.524  
0.224  
0.134  
0.416  
0.560  
0.053  
0.449  
0.066  
0.333  
0.876  
0.152  
0.078  
0.853  
0.123  
0.277  
0.160  
0.671

0.000  
0.035  
0.000  
0.000  
0.000  
0.011  
0.000  
0.000  
0.000  
0.000  
0.029  
0.033  
0.002  
0.000  
0.000  
0.014  
0.037  
0.000  
0.001  
0.000  
0.016  
0.000  
0.000  
0.000



0.000  
0.001  
0.002  
0.000  
0.000  
0.000  
0.001  
0.000  
0.007  
0.000  
0.010  
0.000  
0.000  
0.000  
0.000  
0.000  
0.000  
0.000  
0.000  
0.000  
0.000  
0.039  
0.015  
0.023  
0.009  
0.019  
0.002  
0.004  
0.000  
0.014  
0.000  
0.006  
0.000  
0.000  
0.000  
0.000  
0.035  
0.000  
0.033  
0.001  
0.033  
0.001  
0.000  
0.002  
0.000

0.000  
0.015  
0.003  
0.002  
0.000  
0.000  
0.000  
0.001  
0.000  
0.023  
0.047  
0.000  
0.004  
0.000  
0.000  
0.047  
0.000  
0.000  
0.000  
0.000  
0.000  
0.000  
0.000  
0.012  
0.000  
0.010  
0.027  
0.000  
0.000  
0.000  
0.000  
0.001  
0.007  
0.000  
0.000  
0.000  
0.007  
0.001  
0.023  
0.025  
0.001  
0.000  
0.000

0.014  
0.023  
0.008  
0.000  
0.017  
0.001  
0.006  
0.030  
0.001  
0.000  
0.002  
0.000  
0.014  
0.009  
0.002  
0.000  
0.033  
0.002  
0.015  
0.039  
0.009  
0.020  
0.001  
0.000  
0.015  
0.005  
0.003  
0.000  
0.000  
0.027  
0.004  
0.016  
0.002  
0.003  
0.000  
0.000  
0.001  
0.000  
0.001  
0.020  
0.000  
0.006

0.000  
0.005  
0.038  
0.000  
0.035  
0.039  
0.002  
0.015  
0.000  
0.010  
0.001  
0.000  
0.000  
0.015  
0.000  
0.001  
0.007  
0.008  
0.000  
0.000  
0.027  
0.013  
0.028  
0.000  
0.001  
0.005  
0.000  
0.032  
0.000  
0.008  
0.011  
0.013  
0.000  
0.000  
0.001  
0.000  
0.000  
0.000  
0.000  
0.000  
0.000  
0.014  
0.032  
0.022

0.011  
0.000  
0.036  
0.000  
0.000  
0.000  
0.002  
0.000  
0.001  
0.022  
0.002  
0.015  
0.033  
0.008  
0.000  
0.000  
0.000  
0.035  
0.007  
0.004  
0.002  
0.000  
0.000  
0.016  
0.021  
0.021  
0.003  
0.032  
0.002  
0.000  
0.000  
0.003  
0.000  
0.002  
0.031  
0.005  
0.010  
0.000  
0.003  
0.000  
0.003  
0.001

0.271  
0.182  
0.084  
0.246  
0.206  
0.632  
0.188  
0.949  
0.188  
0.688  
0.092  
0.250  
0.268  
0.067  
0.170  
0.063  
0.100  
0.457  
0.212  
0.294  
0.670  
0.947  
0.134  
0.874  
0.779  
0.181  
0.743  
0.108  
0.362  
0.189  
0.554  
0.827  
0.181  
0.545  
0.995  
0.777  
0.271  
0.388  
0.094  
0.243  
0.221  
0.432

0.688  
0.670  
0.194  
0.056  
0.306  
0.853  
0.188  
0.673  
0.437  
0.667  
0.128  
0.830  
0.541  
0.136  
0.378  
0.215  
0.610  
0.565  
0.425  
0.285  
0.243  
0.844  
0.865  
0.055  
0.945  
0.077  
0.066  
0.395  
0.269  
0.332  
0.650  
0.072  
0.060  
0.407  
0.233  
0.092  
0.108  
0.632  
0.924  
0.130  
0.451  
0.259

0.420  
0.093  
0.853  
0.955  
0.762  
0.587  
0.296  
0.082  
0.062  
0.620  
0.101  
0.999  
0.249  
0.709  
0.710  
0.234  
0.793  
0.153  
0.497  
0.195  
0.101  
0.206  
0.721  
0.101  
0.784  
0.303  
0.260  
0.260  
0.269  
0.181  
0.195  
0.206  
0.181  
0.439  
0.406  
0.437  
0.379  
0.139  
0.148  
0.206  
0.452  
0.513



0.139  
0.377  
0.858  
0.555  
0.726  
0.066  
0.377  
0.291  
0.234  
0.898  
0.670  
0.067  
0.572  
0.699  
0.968  
0.085  
0.084  
0.955  
0.437  
0.565  
0.153  
0.777  
0.206  
0.111  
0.708  
0.900  
0.406  
0.190  
0.754  
0.875  
0.186  
0.075  
0.571  
0.545  
0.924  
0.051  
0.101  
0.315  
0.080  
0.390  
0.659  
0.501

0.130  
0.123  
0.082  
0.207  
0.994  
0.632  
0.699  
0.856  
0.258  
0.624  
0.697  
0.507  
0.670  
0.798  
0.458  
0.911  
0.545  
0.203  
0.875  
0.092  
0.676  
0.078  
0.956  
0.131  
0.258  
0.793  
0.838  
0.671  
0.790  
0.131  
0.251  
0.754  
0.706  
0.110  
0.509  
0.101  
0.107  
0.309  
0.194  
0.259  
0.990  
0.974

0.735  
0.192  
0.726  
0.608  
0.333  
0.540  
0.601  
0.777  
0.458  
0.107  
0.446  
0.320  
0.432  
0.144  
0.883  
0.469  
0.586  
0.324  
0.985  
0.680  
0.234  
0.104  
0.182  
0.333  
0.191  
0.422  
0.671  
0.155  
0.686  
0.339  
0.258  
0.555  
0.206  
0.604  
0.762  
0.407  
0.094  
0.928  
0.942  
0.093  
0.112  
0.298

0.092  
0.844  
0.632  
0.601  
0.948  
0.643  
0.563
