# Supplementary material
Source: PubMed Central journal article supplement (PMC6543812)
Supplement: NIHMS1026625-supplement-Supp_TableS6.pdf [file NIHMS1026625-supplement-Supp_TableS6.pdf]

| Category  | Term                                                             | Count |
|-----------|------------------------------------------------------------------|-------|
| GOTERM_BP | GO:0046034~ATP metabolic process                                 | 6     |
| GOTERM_BP | GO:0006099~tricarboxylic acid cycle                              | 5     |
| GOTERM_BP | GO:0055114~oxidation-reduction process                           | 10    |
| GOTERM_BP | GO:0006102~isocitrate metabolic process                          | 3     |
| GOTERM_BP | GO:0006120~mitochondrial electron transport, NADH to ubiquinone  | 3     |
| GOTERM_BP | GO:0006734~NADH metabolic process                                | 3     |
| GOTERM_BP | GO:0006103~2-oxoglutarate metabolic process                      | 3     |
| GOTERM_BP | GO:0015986~ATP synthesis coupled proton transport                | 3     |
| GOTERM_BP | GO:0014823~response to activity                                  | 3     |
| GOTERM_BP | GO:0015992~proton transport                                      | 3     |
| GOTERM_BP | GO:0006810~transport                                             | 9     |
| GOTERM_BP | GO:0008152~metabolic process                                     | 5     |
| GOTERM_BP | GO:0006086~acetyl-CoA biosynthetic process from pyruvate         | 2     |
| GOTERM_BP | GO:0001889~liver development                                     | 3     |
| GOTERM_BP | GO:0061732~mitochondrial acetyl-CoA biosynthetic process from py | 2     |
| GOTERM_BP | GO:0045333~cellular respiration                                  | 2     |
| GOTERM_BP | GO:0006754~ATP biosynthetic process                              | 2     |
| GOTERM_BP | GO:0005975~carbohydrate metabolic process                        | 3     |
| GOTERM_BP | GO:0008637~apoptotic mitochondrial changes                       | 2     |
| GOTERM_BP | GO:0051881~regulation of mitochondrial membrane potential        | 2     |
| GOTERM_BP | GO:0015991~ATP hydrolysis coupled proton transport               | 2     |
| GOTERM_BP | GO:0006096~glycolytic process                                    | 2     |
| GOTERM_BP | GO:0006635~fatty acid beta-oxidation                             | 2     |
| GOTERM_BP | GO:0016310~phosphorylation                                       | 4     |
| GOTERM_BP | GO:0042493~response to drug                                      | 3     |

| %          | PValue     | Genes                  | List Total | Pop Hits | Pop Total | Fold Enrichm |
|------------|------------|------------------------|------------|----------|-----------|--------------|
|            | 20         | 3.87E-09 Q03265, P97   | 29         | 40       | 18082     | 93.5275862   |
| 16.6666667 | 1.06E-07   | Q99KI0, P082           | 29         | 29       | 18082     | 107.502973   |
| 33.3333333 | 4.93E-07   | P08249, Q9C            | 29         | 676      | 18082     | 9.22362783   |
|            | 10         | 3.46E-05 Q99KI0, Q9D   | 29         | 6        | 18082     | 311.758621   |
|            | 10         | 1.51E-04 O08749, Q9C   | 29         | 12       | 18082     | 155.87931    |
|            | 10         | 1.51E-04 P08249, Q9D   | 29         | 12       | 18082     | 155.87931    |
|            | 10         | 3.48E-04 Q9D6R2, O08   | 29         | 18       | 18082     | 103.91954    |
|            | 10         | 5.73E-04 Q03265, P97   | 29         | 23       | 18082     | 81.3283358   |
|            | 10         | 0.00259967 Q61425, A2A | 29         | 49       | 18082     | 38.174525    |
|            | 10         | 0.00362284 Q03265, P97 | 29         | 58       | 18082     | 32.2508918   |
|            | 30         | 0.00514895 Q03265, P97 | 29         | 1822     | 18082     | 3.07994247   |
| 16.6666667 | 0.00533676 | Q99KI0, P524           | 29         | 463      | 18082     | 6.73344753   |
| 6.6666667  | 0.00771942 | O08749, Q8E            | 29         | 5        | 18082     | 249.406897   |
|            | 10         | 0.00944662 P52480, Q9V | 29         | 95       | 18082     | 19.6900181   |
| 6.6666667  | 0.01232345 | O08749, Q8E            | 29         | 8        | 18082     | 155.87931    |
| 6.6666667  | 0.02902932 | Q91VD9, A2A            | 29         | 19       | 18082     | 65.6333938   |
| 6.6666667  | 0.03503635 | Q03265, P52            | 29         | 23       | 18082     | 54.2188906   |
|            | 10         | 0.04021318 P08249, Q8B | 29         | 206      | 18082     | 9.08034818   |
| 6.6666667  | 0.04100755 | Q91VD9, P08            | 29         | 27       | 18082     | 46.1864623   |
| 6.6666667  | 0.04249477 | Q91VD9, P08            | 29         | 28       | 18082     | 44.5369458   |
| 6.6666667  | 0.04989758 | Q03265, P50            | 29         | 33       | 18082     | 37.7889237   |
| 6.6666667  | 0.05431274 | P52480, P171           | 29         | 36       | 18082     | 34.6398467   |
| 6.6666667  | 0.06599    | Q61425, Q9J            | 29         | 44       | 18082     | 28.3416928   |
| 13.3333333 | 0.06759604 | P30275, P524           | 29         | 612      | 18082     | 4.07527609   |
|            | 10         | 0.09632189 Q61425, Q9V | 29         | 339      | 18082     | 5.51785169   |

| Bonferroni | Benjamini  | FDR        |
|------------|------------|------------|
| 7.78E-07   | 7.78E-07   | 4.86E-06   |
| 2.14E-05   | 1.07E-05   | 1.33E-04   |
| 9.92E-05   | 3.31E-05   | 6.19E-04   |
| 0.00692109 | 0.00173478 | 0.04333457 |
| 0.02992818 | 0.00605861 | 0.18945096 |
| 0.02992818 | 0.00605861 | 0.18945096 |
| 0.06764481 | 0.0116057  | 0.43616732 |
| 0.10888321 | 0.01633368 | 0.7168673  |
| 0.40738676 | 0.06330885 | 3.21258378 |
| 0.51785645 | 0.07785891 | 4.45073149 |
| 0.64570077 | 0.09855959 | 6.27042151 |
| 0.65889388 | 0.0931501  | 6.49213939 |
| 0.78936371 | 0.12173057 | 9.26341901 |
| 0.85159302 | 0.13649329 | 11.2248681 |
| 0.91728901 | 0.16308165 | 14.4054235 |
| 0.99731818 | 0.32615196 | 30.8947627 |
| 0.99922963 | 0.36112067 | 36.0703583 |
| 0.99973871 | 0.38447883 | 40.2418879 |
| 0.99977877 | 0.37347806 | 40.8593514 |
| 0.99983805 | 0.3683256  | 41.9996165 |
| 0.99996597 | 0.40214926 | 47.3803758 |
| 0.99998666 | 0.41403822 | 50.366804  |
| 0.9999989  | 0.46405433 | 57.5298695 |
| 0.99999922 | 0.45754172 | 58.4369094 |
| 1          | 0.57183096 | 71.9309445 |
