# Supplementary material
Source: PubMed Central journal article supplement (PMC6543812)
Supplement: NIHMS1026625-supplement-Supp_TableS7.pdf [file NIHMS1026625-supplement-Supp_TableS7.pdf]

| Category  | Term       | Count | %          | PValue     | Genes       | List Total |
|-----------|------------|-------|------------|------------|-------------|------------|
| GOTERM_BP | GO:0030150 | 2     | 22.2222222 | 0.00705834 | Q9WTQ8, Q9  | 9          |
| GOTERM_BP | GO:0006635 | 2     | 22.2222222 | 0.01930559 | Q8QZT1, P55 | 9          |
| GOTERM_BP | GO:0014070 | 2     | 22.2222222 | 0.0348577  | Q8QZT1, P55 | 9          |
| GOTERM_BP | GO:0006886 | 2     | 22.2222222 | 0.09816871 | Q9WTQ8, Q9  | 9          |

| Pop Hits | Pop Total | Fold Enrichm | Bonferroni | Benjamini  | FDR        |
|----------|-----------|--------------|------------|------------|------------|
| 16       | 18082     | 251.138889   | 0.24137779 | 0.24137779 | 6.23849091 |
| 44       | 18082     | 91.3232323   | 0.53246479 | 0.31623454 | 16.2455412 |
| 80       | 18082     | 50.2277778   | 0.74935291 | 0.36949643 | 27.5773214 |
| 232      | 18082     | 17.3199234   | 0.98222184 | 0.63484968 | 60.9238338 |
