# Supplementary material
Source: PubMed Central journal article supplement (PMC6543812)

**A**

NIH/3T3

SH-SY5Y

Control

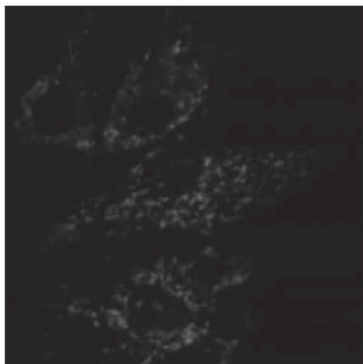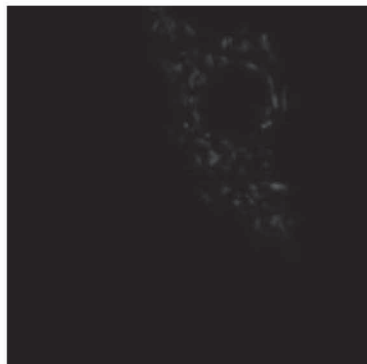

MitoNEET

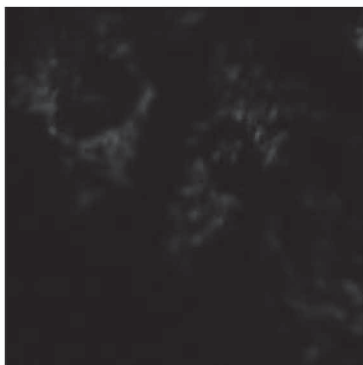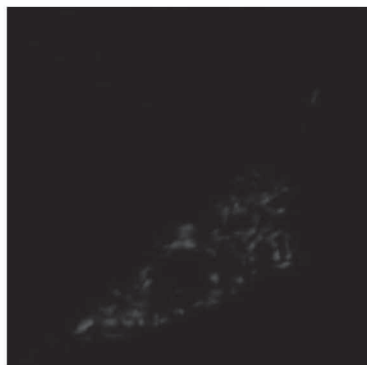**B**

12 24 48 72 96 hours post-transfection

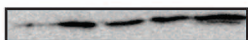

MitoNEET

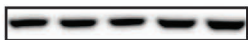

Atp5b

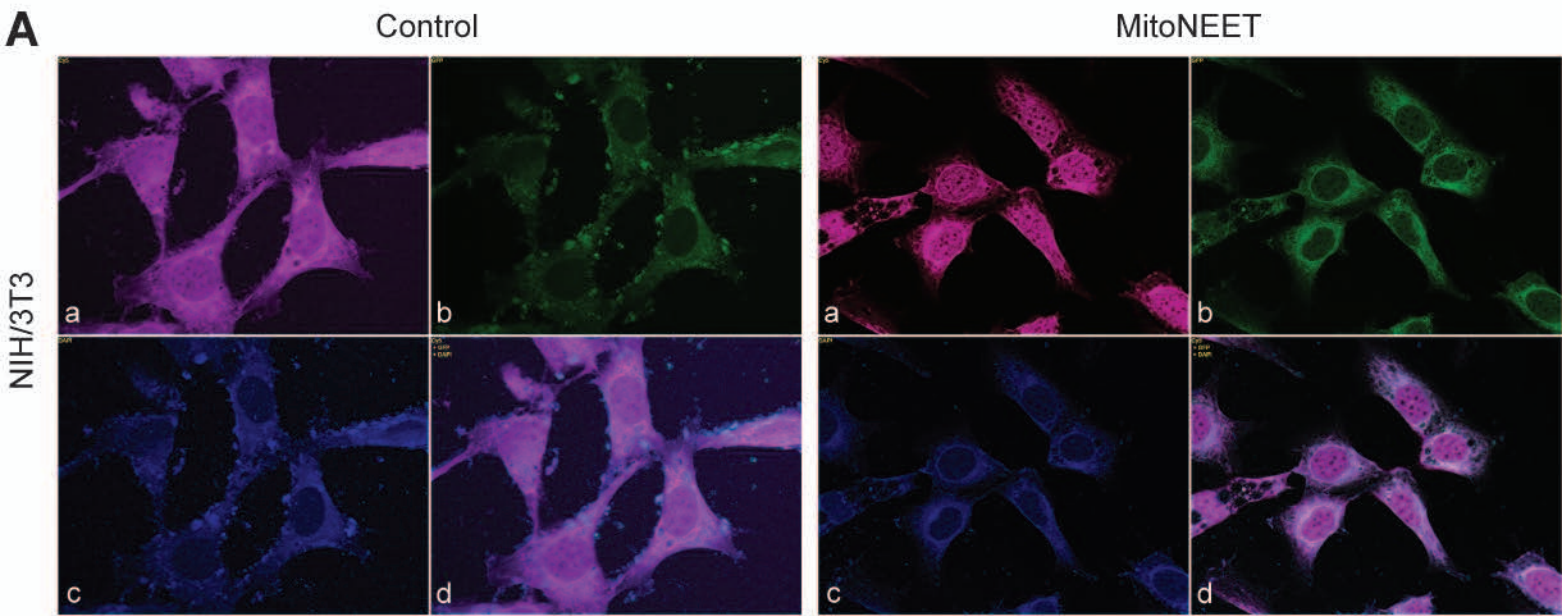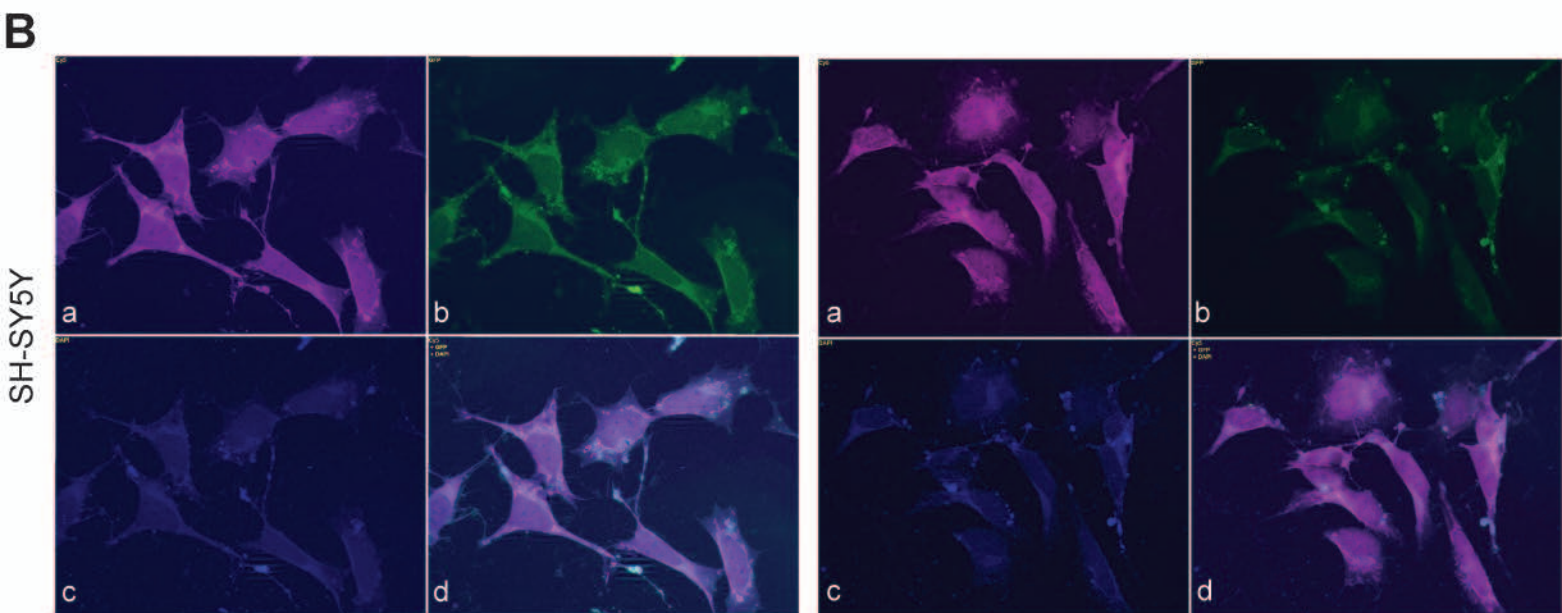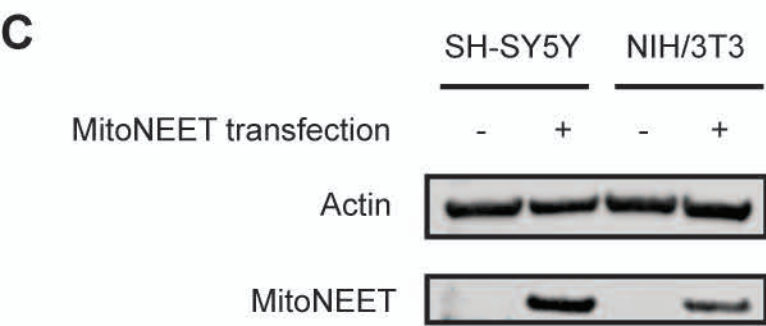

Supplement: NIHMS1026625-supplement-Supp_FigS1-2.pdf [file NIHMS1026625-supplement-Supp_FigS1-2.pdf]
